# Supplementary material for: Spatial multiomics of acute myocardial infarction reveals immune cell infiltration through the endocardium
Source: Springer Nature journal article supplement (doi:10.1038/s44161-025-00717-y), 2025-10-03
Supplement: MOESM1 [file 44161_2025_717_MOESM1_ESM.pdf › 44161_2025_717_MOESM1_ESM.pdf]

# **Spatial multiomics of acute myocardial infarction reveals immune cell infiltration through the endocardium**

---

In the format provided by the  
authors and unedited

## **Table of Contents - Supplementary Information**

### **Supplementary Figures**

Supplementary Figure 1  
Supplementary Figure 2  
Supplementary Figure 3  
Supplementary Figure 4  
Supplementary Figure 5  
Supplementary Figure 6  
Supplementary Figure 7  
Supplementary Figure 8  
Supplementary Figure 9  
Supplementary Figure 10

## Supplementary Figures

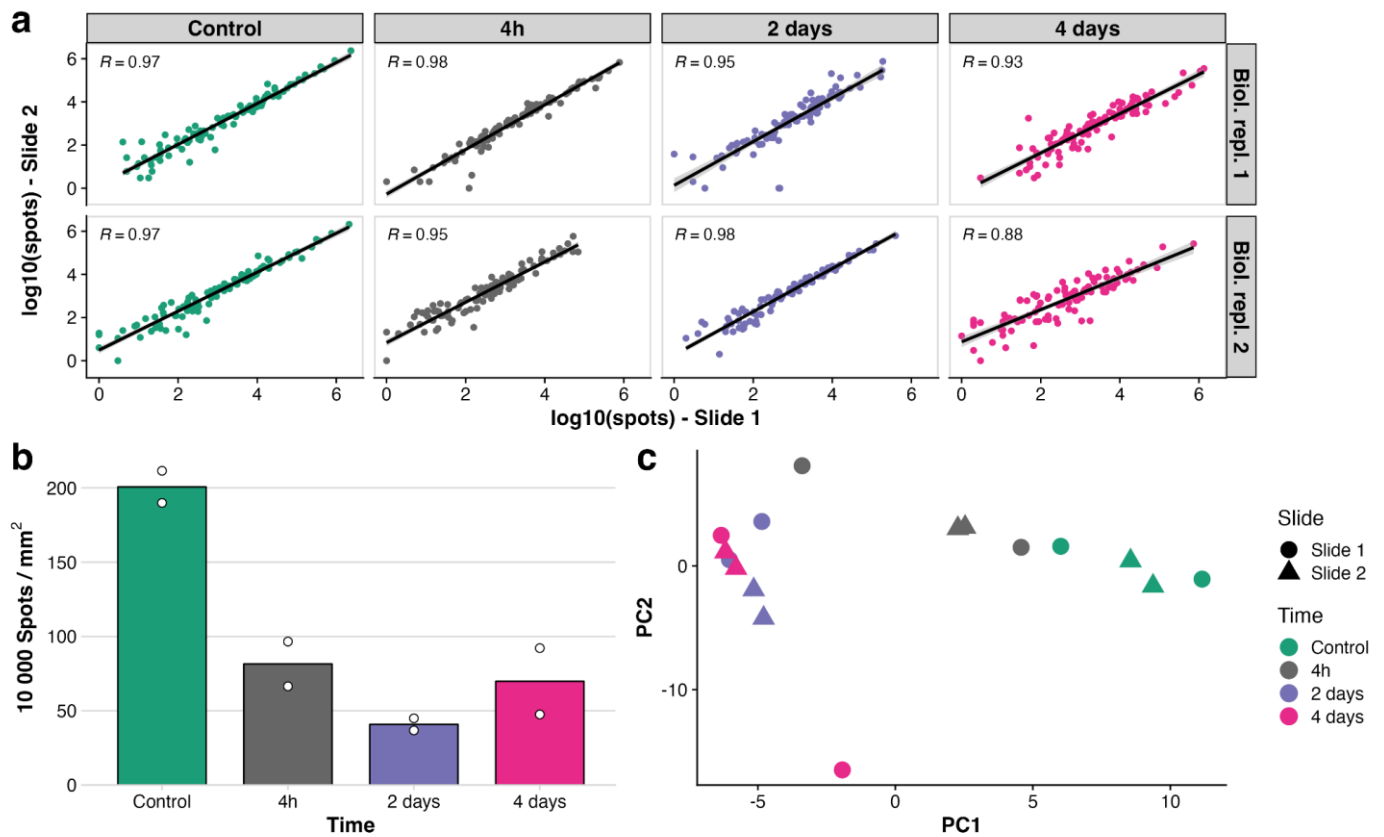

**Supplementary Figure 1: Quality control of Molecular Cartography RNA spot count data.** **a)** Correlation between technical replicates across two runs of Molecular Cartography across four timepoints of acute MI. R: Pearson correlation coefficient of log10 spot sum between technical replicates. **b)** Relative number of RNA spots identified per square micrometre of tissue measured using Molecular Cartography. **c)** Principal component analysis of samples by total RNA spots per gene. The outlier samples for the 4-hour and 4-day time points both have multiple small image tiles with spots missing due to failing quality control during spot calling by Resolve Bioscience.

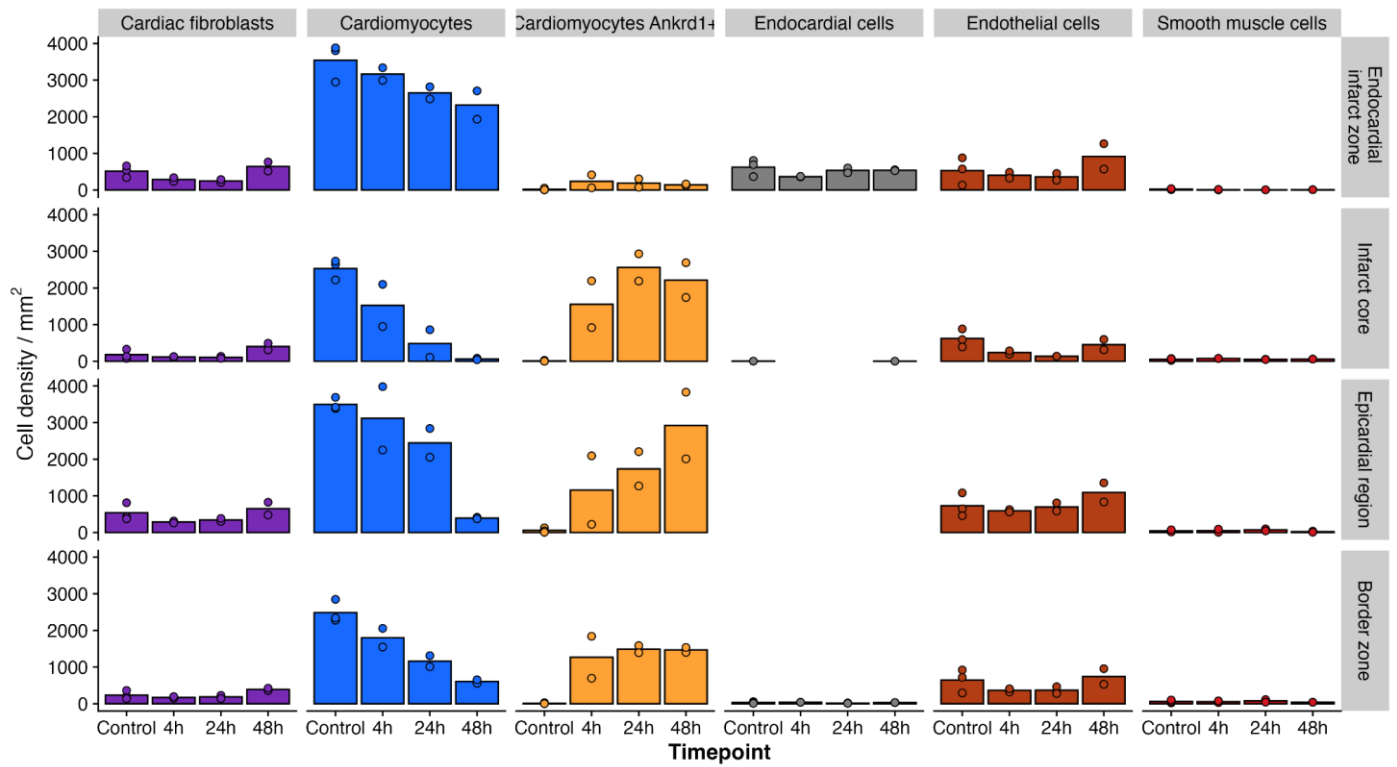

**Supplementary Figure 2: Density of non-immune cells in different regions of the heart across acute MI in SeqIF data.** Bars represent mean cell density across biological replicates and points represent individual measurements (n= 3 for control, n=2 for infarct groups).

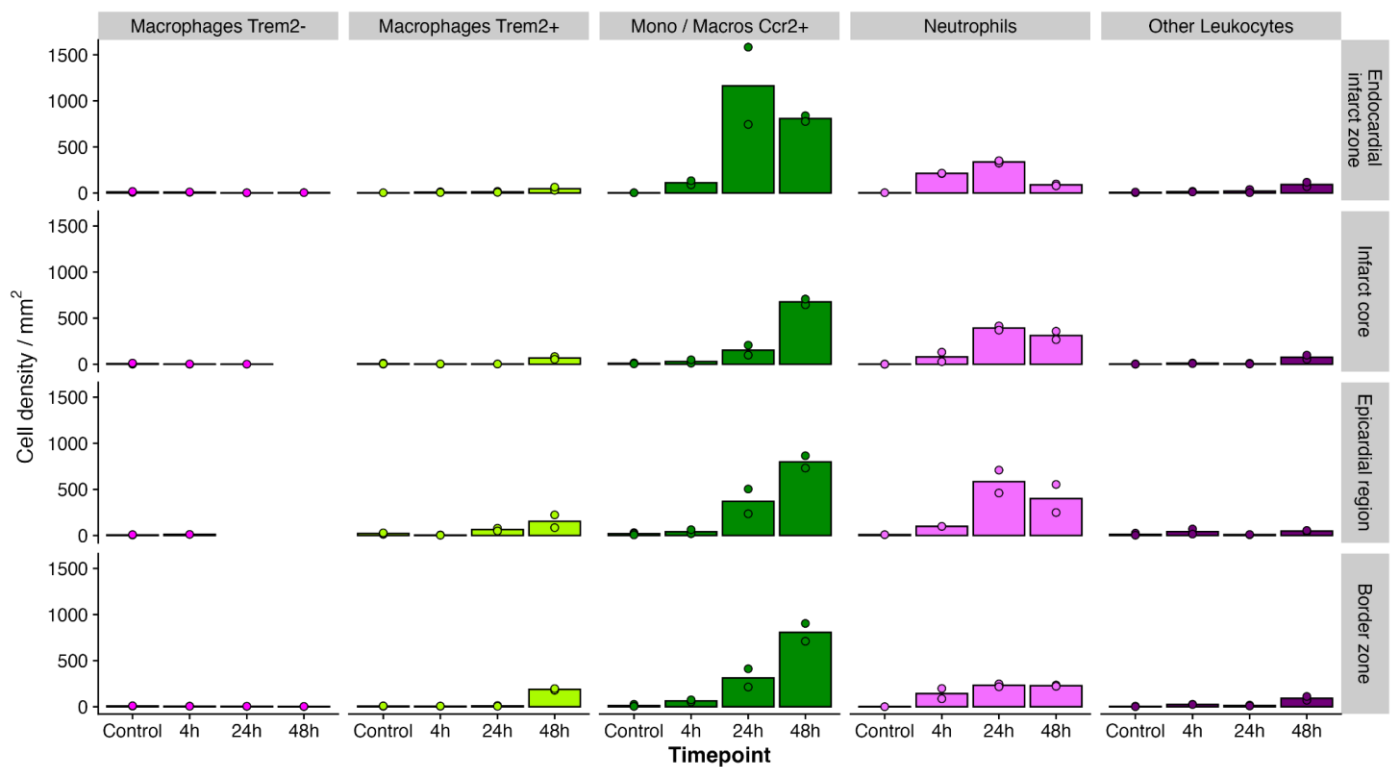

**Supplementary Figure 3: Density of immune cells in different regions of the heart across acute MI in SeqIF data.** Bars represent mean cell density across biological replicates and points represent individual measurements (n= 3 for control, n=2 for infarct groups).

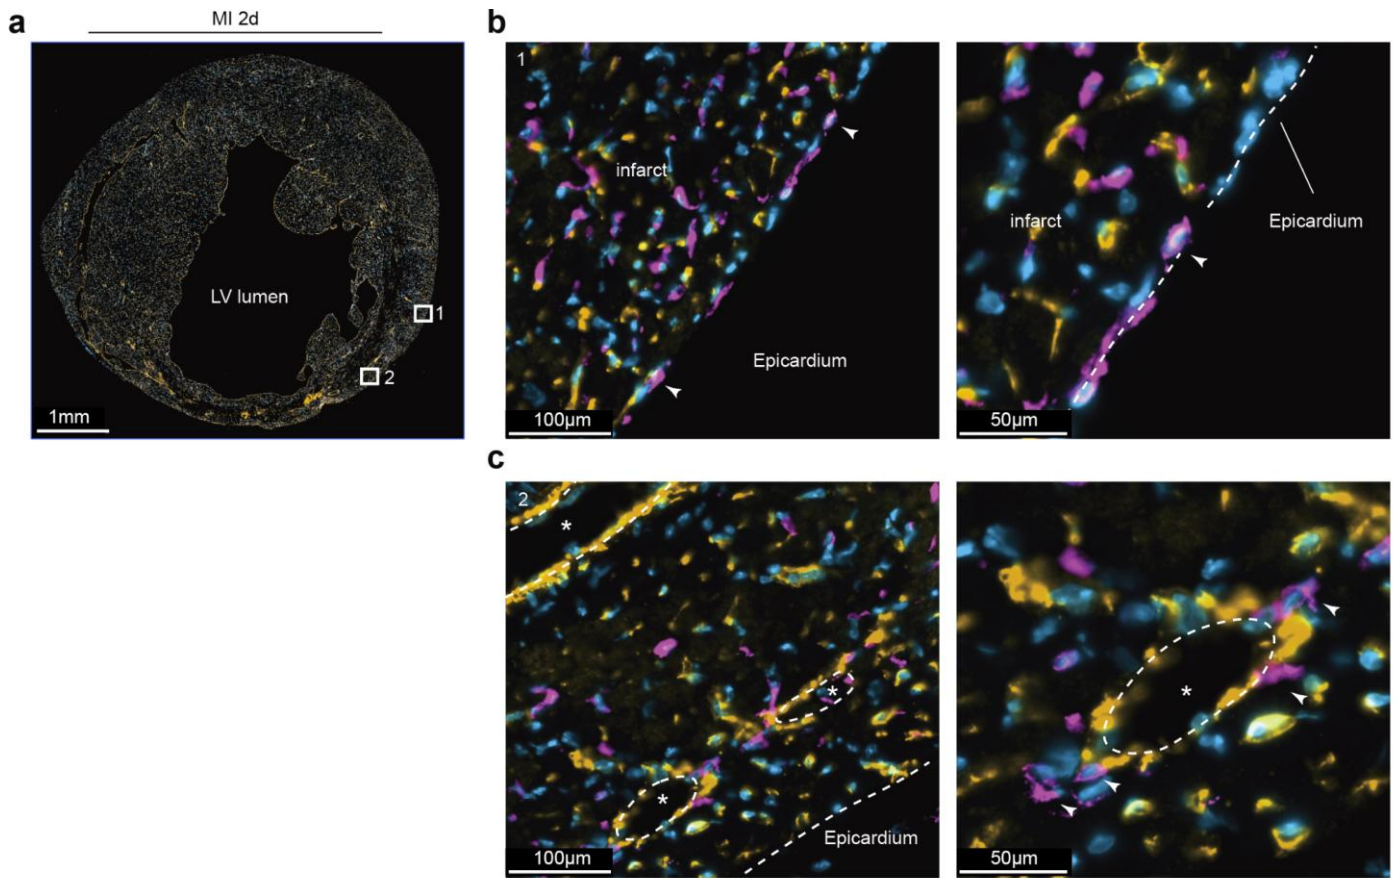

**Supplementary Figure 4: CCR2+ cells in proximity to epicardium and epicardial vessels.** a) Overview section 2d post-MI with staining of CD31 (yellow), CCR2 (magenta) and DAPI (blue). b) and c) Magnified areas with a focus on the epicardial region displaying CCR2+ cells on the surface of the epicardium (arrows) and epicardial vessels (marked by asterisks). The mid and right panel displays magnifications of the marked box in the left overview panel.

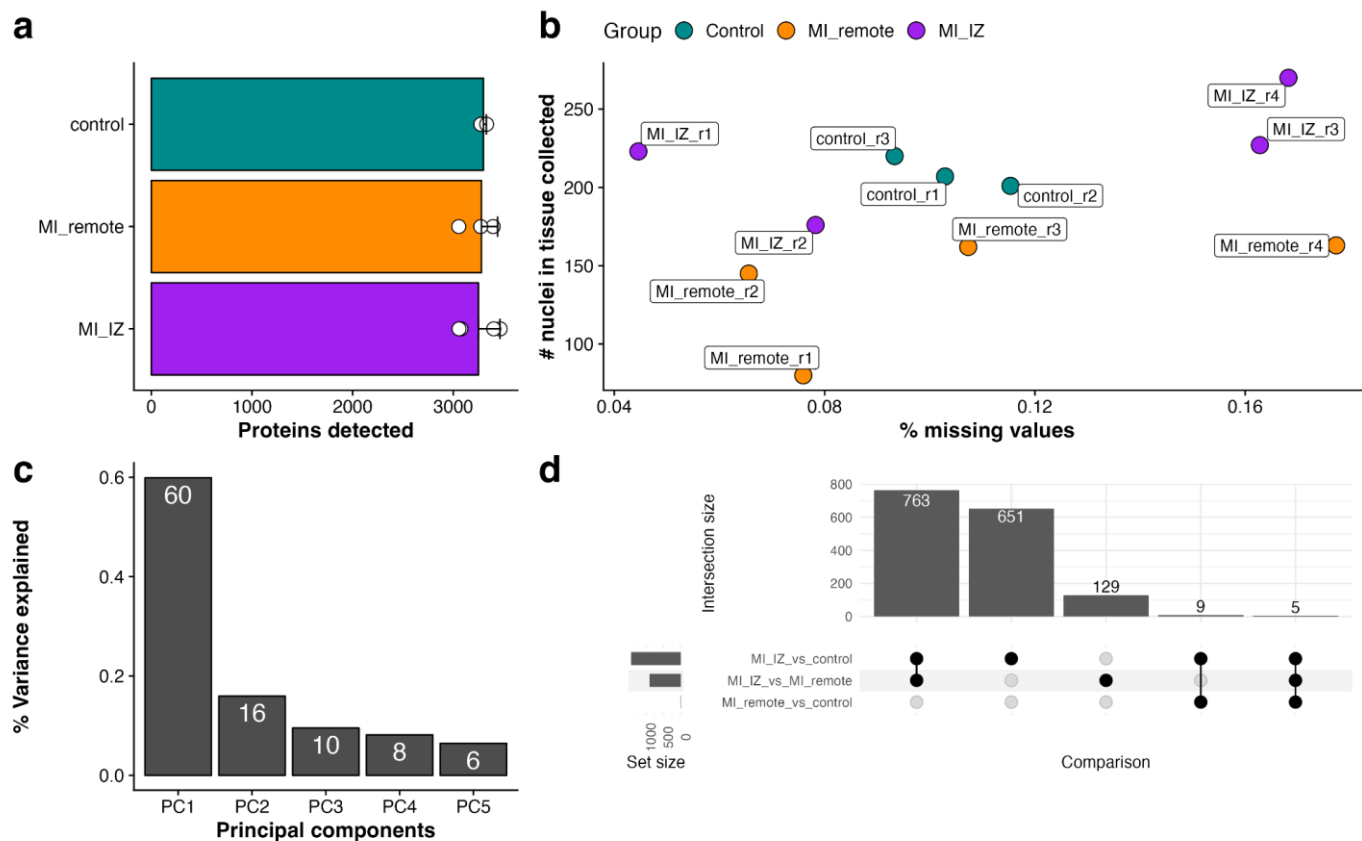

**Supplementary Figure 5: Quality control of DVP data. a)** Number of proteins identified per sample within each treatment / subregion group. **b)** Scatterplot showing the percentage of missing values in the proteomic data against the number of nuclei that were detected within the region marked for laser microdissection **c)** Percent variance explained by the first five principal components for proteomics data. Principal component one separates samples by treatment group / subregion and explains 60% of the variance within the data. **d)** Upset plot showing overlap between significantly differentially expressed proteins between all three laser microdissected regions.

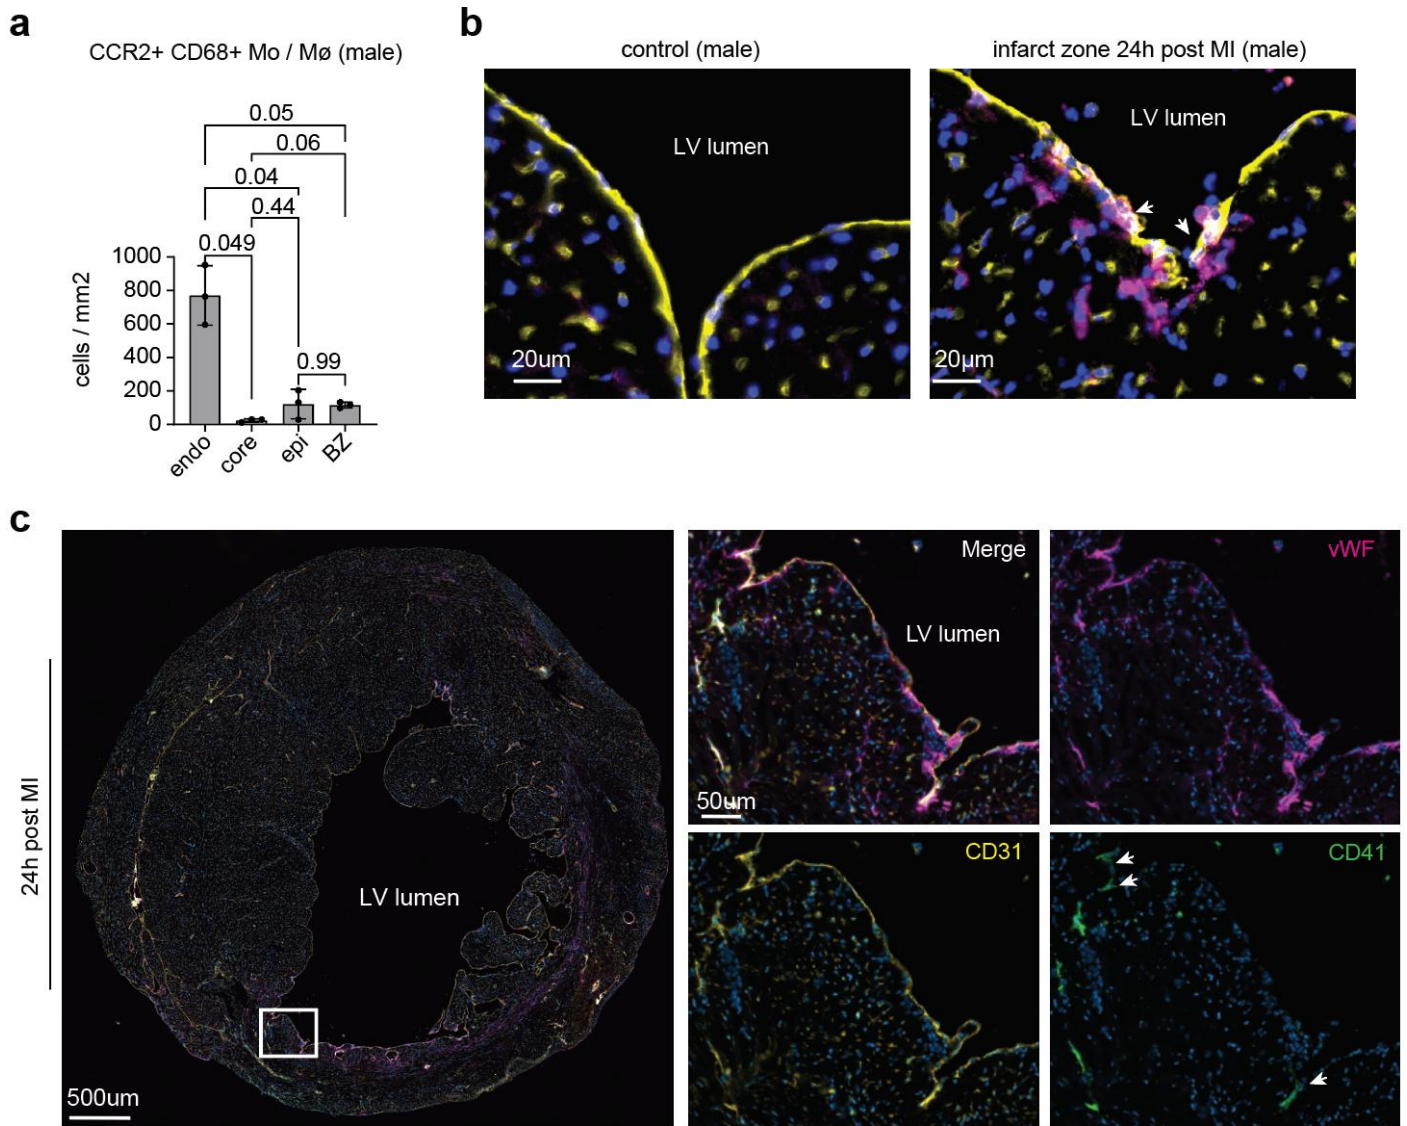

**Supplementary Figure 6: a)** Quantification of infiltrating CCR2+ CD68+ Mo/M $\phi$  in different regions of the infarcted heart 24 hours post-MI in male mice. Data show mean $\pm$ SD (n=3 per group). *P* values were determined by one-way ANOVA with repeated measurements followed by Tukey multiple comparison. **b)** Representative immunofluorescence stainings of CCR2+ cells (magenta) in the healthy and infarcted myocardium of male mice. DAPI in blue and CD31 in yellow. Arrows indicate CCR2+ attaching or infiltrating at the endocardial layer. **c)** Co-staining of vWF, CD31 and CD41 in the infarct region 24h after permanent occlusion indicates a platelet-independent mechanism. Arrows indicate CD41+ platelets in some but not all vWF+ areas.



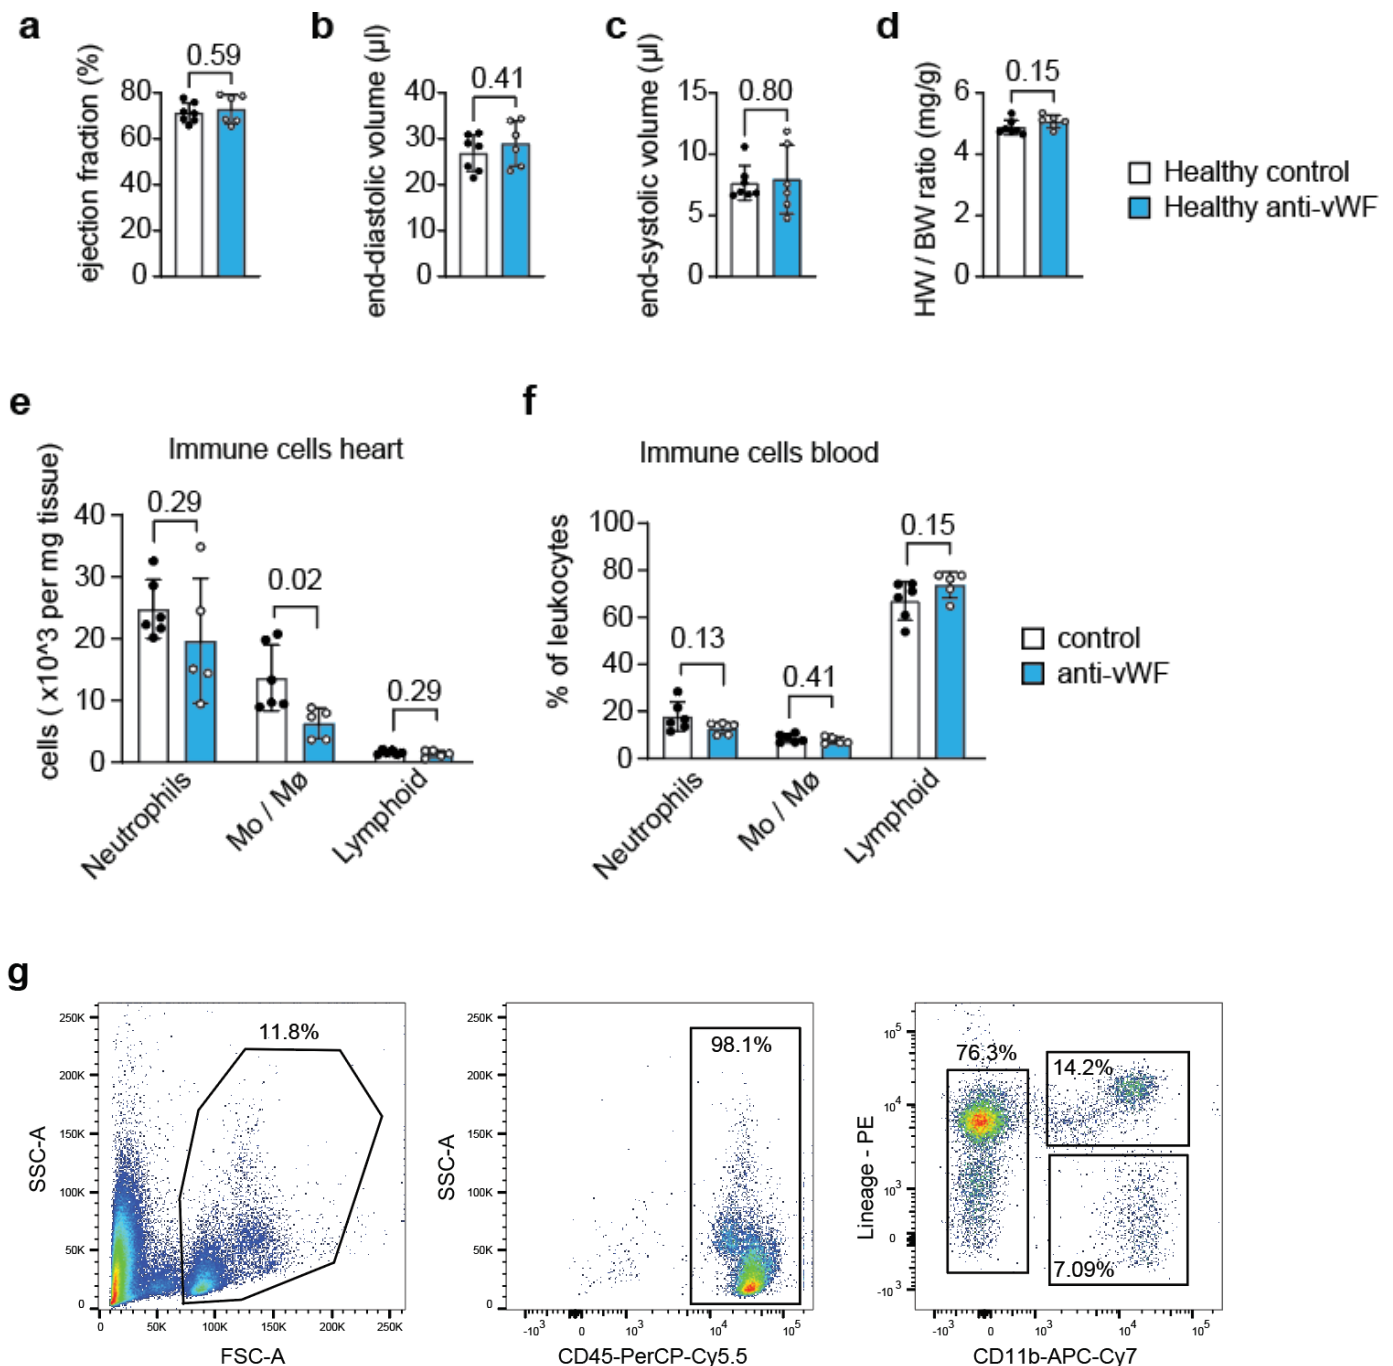

**Supplementary Figure 7: Effects of anti-vWF blockade via antibody in healthy and infarcted mice. a-c)** LV ejection fraction, end-systolic and end-diastolic volume determined by echocardiography 14d after antibody treatment in healthy mice (n=7 for control, n=6 for anti-vWF). *P* value was calculated using 2-tailed Student t test. **d)** Heart weight to body weight ratios after organ removal. **e)** Absolute counts of neutrophils, Mo/Mφ and lymphoid cell based on flow cytometry analysis of digested heart at the 2 day post-MI time point in anti-vWF treated mice (n=5) compared to controls (n=6). *P* values were calculated using 2-tailed Student t test. **f)** Relative cell counts (in % of total blood leukocytes) 2 days post-MI in anti-vWF treated and the control mice. *P* values were calculated using 2-tailed Student t test. **g)** Gating strategy for quantification of blood cell counts. Mo/Mφ were identified as CD45+, Lin-(CD19;CD4;NK1.1;Ly6G;Ter119), CD11b+. Neutrophils were identified as CD45+, Lin+(CD19;CD4;NK1.1;Ly6G;Ter119), CD11b+. Lymphoid cells were gated CD45+, Lin-(CD19;CD4;NK1.1;Ly6G;Ter119), CD11b-.



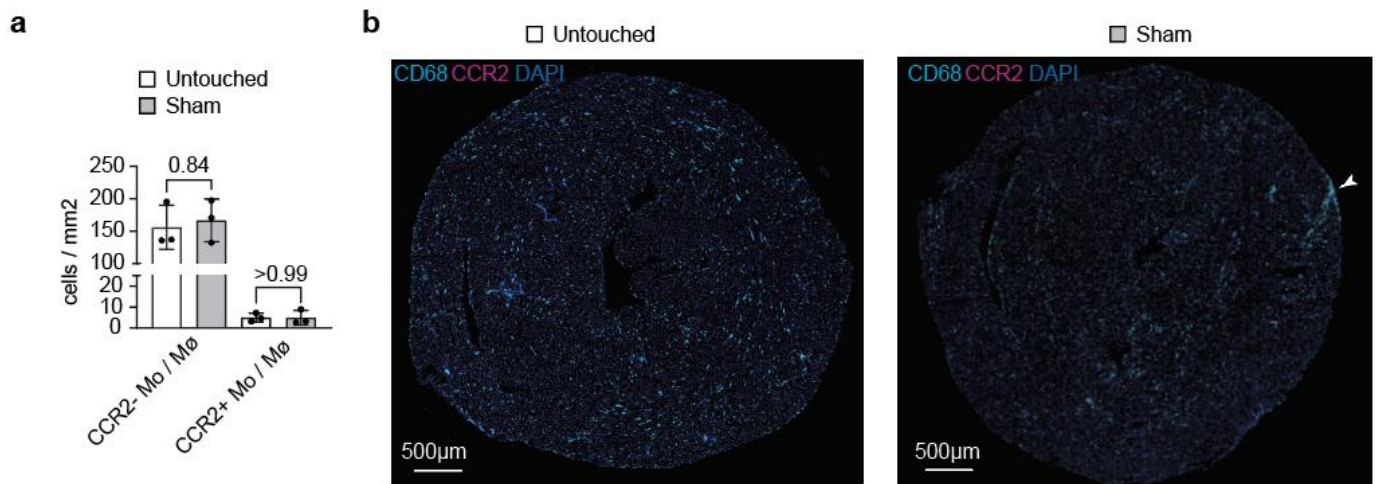

**Supplementary Figure 8: Monocyte / macrophage counts in untouched and sham-operated mice. a)** Quantification of CCR2+ CD68+ and CCR2- CD68+ Mo/Mφ in untouched and sham-operated hearts (24 hours after sham intervention). Data show mean±SD (n=3 per group). *P* values were calculated using 2-tailed Student *t* test. **b)** Co-staining of CCR2, CD68 and DAPI in hearts of untouched and sham-operated mice. The arrow marks a lesion with defined accumulation of CD68+ Mo/Mφ caused by electrocoagulation.

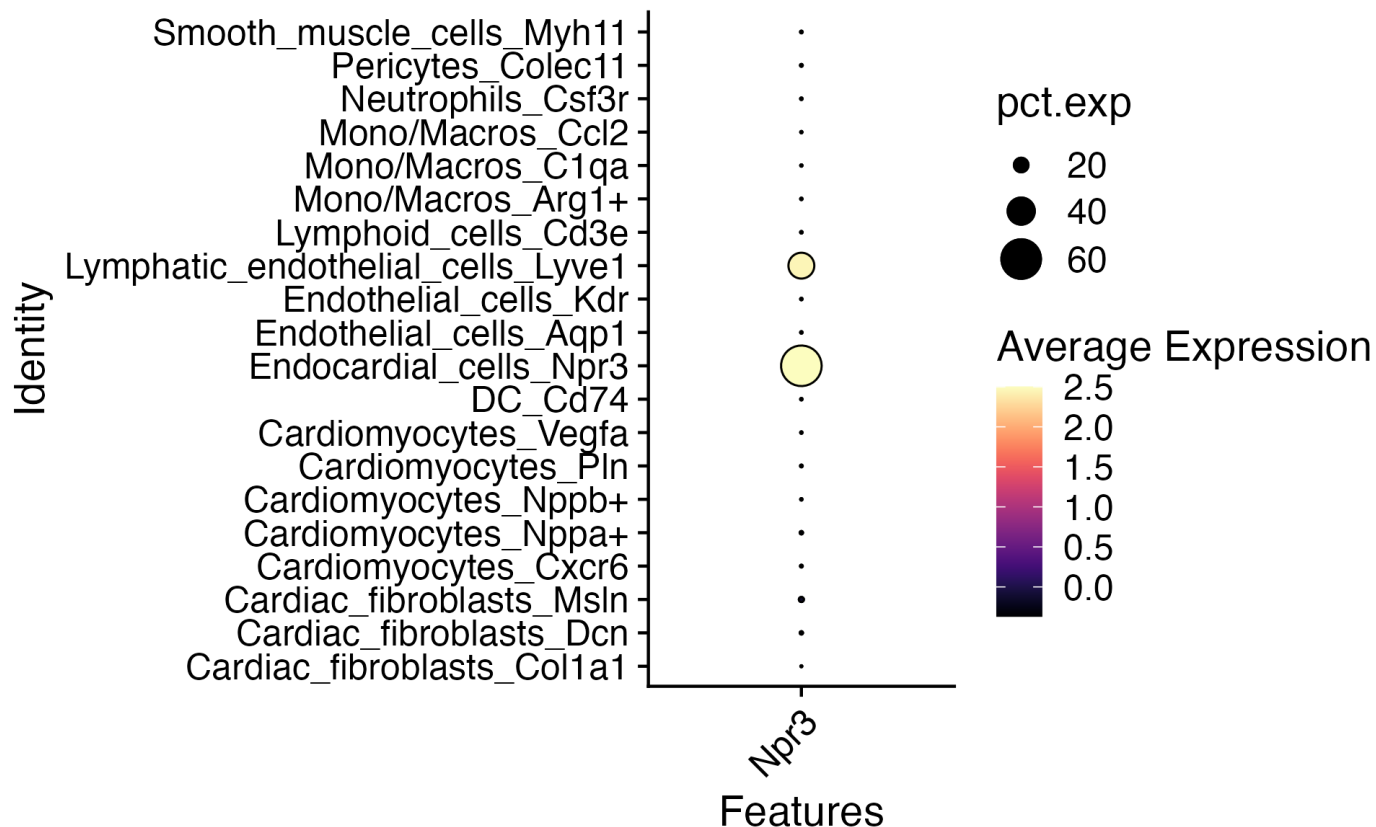

**Supplementary Figure 9: Dotplot showing Npr3 expression over fine-grained cell type annotations in the Molecular Cartography dataset.** While Npr3 is primarily expressed in the Endocardial cells in our data set, the absence of detected Npr3 transcripts in a subset of endocardial cells may reflect transcriptional heterogeneity and/or technical limitations of Molecular Cartography in capturing low-abundance transcripts.

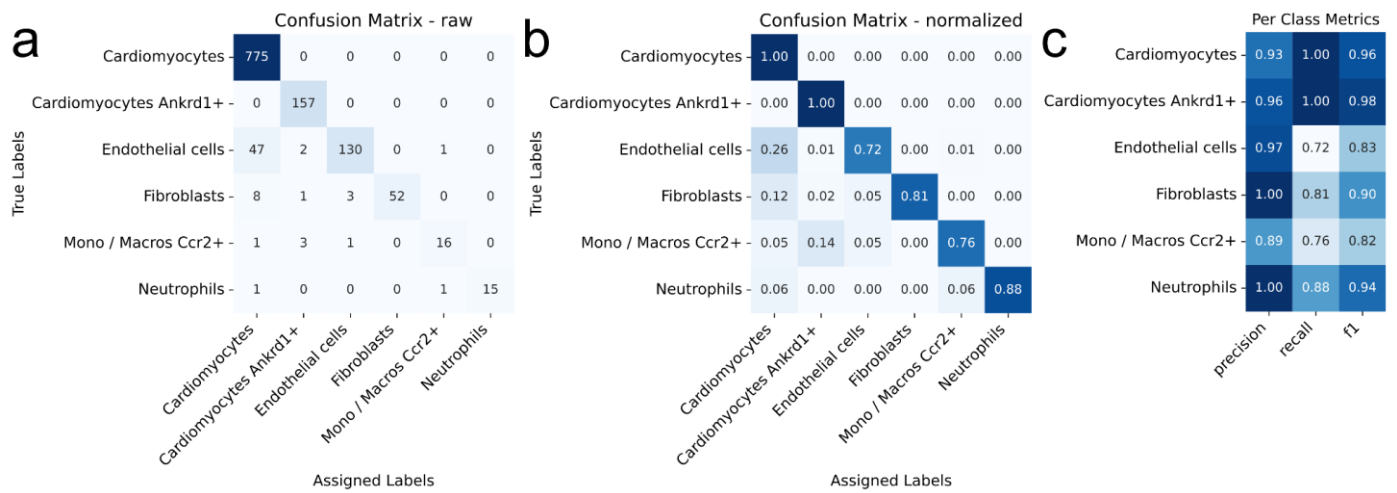

**Supplementary Figure 10: Evaluation of Pixie-based phenotyping by comparison to an independently labeled ground truth data subset focusing on phenotypes which appear 10 or more times in the corresponding annotations. a)** Confusion matrix containing the absolute number of assertions for each pair of true and assigned labels. **b)** Normalized confusion matrix containing the scaled assertions for each true class. **c)** Summary of precision, recall and F1 scores for each phenotype.
