# Supplementary material for: Spatial multiomics of acute myocardial infarction reveals immune cell infiltration through the endocardium
Source: Springer Nature journal article supplement (doi:10.1038/s44161-025-00717-y), 2025-10-03
Supplement: MOESM3 [file 44161_2025_717_MOESM3_ESM.xlsx]

## Sheet: Supplementary Table 1
Supplementary Table 1: Transcript panel design for Molecular Cartography.
Overview of the custom 100 gene panel designed for Molecular Cartography. Genes were selected based on a combination of expert knowledge, evidence from single-cell studies and functional relevance. The column “Function” describes the main reason for inclusion: EMT = Endothelial-to-mesenchymal transition, cell_type_marker = gene is specifically expressed in scRNA-seq data, MI_pathway = prior evide…
Number	Catalog_Nr	Species	Target	Gene_name	Function	Cell_type	Reference_id	Reference URL
1	P0D1P	Mus musculus	ENSMUSG00000006932	Ctnnb1	EMT	Endothelial cells	Xu_et_al	https://www.nature.com/articles/cr20095
2	P0E2P	Mus musculus	ENSMUSG00000023992	Trem2	cell_type_marker	Monocytes	Rizzo_et_al	https://academic.oup.com/cardiovascres/article/119/3/772/6660804
3	P0WCH	Mus musculus	ENSMUST00000103230	Nppa	cell_type_marker	Cardiomyocytes	Galow_et_al	https://www.mdpi.com/2073-4409/9/5/1144/htm
4	P0XCG	Mus musculus	ENSMUST00000024988	C3	cell_type_marker	Endothelial cells	Galow_et_al	https://www.mdpi.com/2073-4409/9/5/1144/htm
5	P1E4S	Mus musculus	ENSMUSG00000019929	Dcn	cell_type_marker	Fibroblasts	Galow_et_al	https://www.mdpi.com/2073-4409/9/5/1144/htm
6	P1E9Y	Mus musculus	ENSMUST00000033036	Dkk3	cell_type_marker	Fibroblasts	Skelly_et_al	https://www.sciencedirect.com/science/article/pii/S2211124717319095
7	P1F4R	Mus musculus	ENSMUSG00000054641	Mmrn1	cell_type_marker	Endothelial cells	Galow_et_al	https://www.mdpi.com/2073-4409/9/5/1144/htm
8	P1R2D	Mus musculus	ENSMUSG00000024621	Csf1r	cell_type_marker	Macrophages	Jin_et_al	https://onlinelibrary.wiley.com/doi/10.1002/smtd.202100752
9	P1W4A	Mus musculus	ENSMUSG00000031765	Mt1	cell_type_marker	Fibroblasts	Forte_et_al	https://www.sciencedirect.com/science/article/pii/S2211124720301625
10	P1XCH	Mus musculus	ENSMUST00000103231	Nppb	cell_type_marker	Cardiomyocytes	van_Duijvenboden_et_al	https://www.ahajournals.org/doi/10.1161/CIRCULATIONAHA.118.038944
11	P2A5Y	Mus musculus	ENSMUSG00000002944	Cd36	cell_type_marker	Endothelial cells	Forte_et_al	https://www.sciencedirect.com/science/article/pii/S2211124720301625
12	P2WCK	Mus musculus	ENSMUSG00000000957	Mmp14	cell_type_marker	EndMA+	Tombor_et_al	https://www.nature.com/articles/s41467-021-20905-1
13	P3663	Mus musculus	ENSMUSG00000030724	Cd19	cell_type_marker	Lymphocytes	Jin_et_al	https://onlinelibrary.wiley.com/doi/10.1002/smtd.202100752
14	P3960	Mus musculus	ENSMUST00000033310	Mki67	cell_type_marker	Proliferative cells	Galow_et_al	https://www.mdpi.com/2073-4409/9/5/1144/htm
15	P3WCM	Mus musculus	ENSMUSG00000033016	Nfatc1	cell_type_marker	Endocardial cells	Zhang_et_al	https://www.ahajournals.org/doi/10.1161/CIRCRESAHA.117.312136
16	P4R7N	Mus musculus	ENSMUST00000028389	Frzb	cell_type_marker	Fibroblasts	Skelly_et_al	https://www.sciencedirect.com/science/article/pii/S2211124717319095
17	P4WCN	Mus musculus	ENSMUST00000034339	Cdh5	cell_type_marker	Endothelial cells	Skelly_et_al	https://www.ahajournals.org/doi/full/10.1161/ATVBAHA.117.310549
18	P5M7T	Mus musculus	ENSMUSG00000063011	Msln	cell_type_marker	Epicardial cells	Galow_et_al	https://www.mdpi.com/2073-4409/9/5/1144/htm
19	P5WCP	Mus musculus	ENSMUST00000004774	Aqp1	cell_type_marker	Endothelial cells	Galow_et_al	https://www.mdpi.com/2073-4409/9/5/1144/htm
20	P638C	Mus musculus	ENSMUST00000092163	Lyz2	cell_type_marker	Monocytes	Galow_et_al	https://www.mdpi.com/2073-4409/9/5/1144/htm
21	P6952	Mus musculus	ENSMUSG00000026193	Fn1	cell_type_marker	EndMA+	Tombor_et_al	https://www.nature.com/articles/s41467-021-20905-1
22	P6G90	Mus musculus	ENSMUST00000046285	C1qa	cell_type_marker	Monocytes	Forte_et_al	https://www.nature.com/articles/s41586-020-2797-4
23	P6WCQ	Mus musculus	ENSMUSG00000029648	Flt1	cell_type_marker	Endothelial cells	Galow_et_al	https://www.mdpi.com/2073-4409/9/5/1144/htm
24	P7C84	Mus musculus	ENSMUST00000046384	C1qb	cell_type_marker	Macrophages	Jin_et_al	https://onlinelibrary.wiley.com/doi/10.1002/smtd.202100752
25	P7R1J	Mus musculus	ENSMUSG00000023951	Vegfa	cell_type_marker	Cardiomyocytes	Galow_et_al	https://www.mdpi.com/2073-4409/9/5/1144/htm
26	P7T6N	Mus musculus	ENSMUSG00000027750	Postn	cell_type_marker	Fibroblasts	Forte_et_al	https://www.sciencedirect.com/science/article/pii/S2211124720301625
27	P7WCR	Mus musculus	ENSMUSG00000020218	Wif1	cell_type_marker	Fibroblasts	Skelly_et_al	https://www.sciencedirect.com/science/article/pii/S2211124717319095
28	P8WCS	Mus musculus	ENSMUST00000031318	Cxcl5	cell_type_marker	Fibroblasts	Forte_et_al	https://www.sciencedirect.com/science/article/pii/S2211124720301625
29	P9R2N	Mus musculus	ENSMUSG00000031425	Plp1	cell_type_marker	Schwann cells	Forte_et_al	https://www.sciencedirect.com/science/article/pii/S2211124720301625
30	P9WCT	Mus musculus	ENSMUST00000033050	Lyve1	cell_type_marker	Lymphatic endothelial cells	Forte_et_al	https://www.sciencedirect.com/science/article/pii/S2211124720301625
31	PAD1L	Mus musculus	ENSMUSG00000024401	Tnf	cell_type_marker	Neutrophils	Forte_et_al	https://www.sciencedirect.com/science/article/pii/S2211124720301625
32	PAF40	Mus musculus	ENSMUSG00000049103	Ccr2	cell_type_marker	Monocytes	Rizzo_et_al	https://academic.oup.com/cardiovascres/article/119/3/772/6660804
33	PAM5X	Mus musculus	ENSMUSG00000022952	Runx1	MI_pathway	Cardiomyocytes	McCarroll_et_al	https://www.ahajournals.org/doi/10.1161/CIRCULATIONAHA.117.028911
34	PAT2M	Mus musculus	ENSMUSG00000055435	Maf	cell_type_marker	Monocytes	Galow_et_al	https://www.mdpi.com/2073-4409/9/5/1144/htm
35	PAWCV	Mus musculus	ENSMUST00000000193	Ccl2	cell_type_marker	Monocytes	Forte_et_al	https://www.sciencedirect.com/science/article/pii/S2211124720301625
36	PC66C	Mus musculus	ENSMUST00000113516	Kdr	cell_type_marker	Endothelial cells	Farbehi_et_al	https://elifesciences.org/articles/43882
37	PCF74	Mus musculus	ENSMUST00000019266	Ccl9	cell_type_marker	Monocytes	Forte_et_al	https://www.sciencedirect.com/science/article/pii/S2211124720301625
38	PCG73	Mus musculus	ENSMUST00000020161	Arg1	cell_type_marker	Monocytes	Forte_et_al	https://www.sciencedirect.com/science/article/pii/S2211124720301625
39	PCWCW	Mus musculus	ENSMUST00000089620	Cd86	cell_type_marker	Monocytes	Pinto_et_al	https://www.frontiersin.org/journals/immunology/articles/10.3389/fimmu.2018.00454/full
40	PD958	Mus musculus	ENSMUSG00000038583	Pln	cell_type_marker	Cardiomyocytes	Litvinuková_et_al	https://www.nature.com/articles/s41586-020-2797-4
41	PDWCX	Mus musculus	ENSMUST00000000299	Itgb2	cell_type_marker	Immune cells	Forte_et_al	https://www.sciencedirect.com/science/article/pii/S2211124720301625
42	PE959	Mus musculus	ENSMUSG00000021313	Ryr2	cell_type_marker	Cardiomyocytes	Litvinuková_et_al	https://www.nature.com/articles/s41586-020-2797-4
43	PEF43	Mus musculus	ENSMUSG00000051504	Siglech	cell_type_marker	Dendritic cells	Jin_et_al	https://onlinelibrary.wiley.com/doi/10.1002/smtd.202100752
44	PEF76	Mus musculus	ENSMUSG00000026581	Sell	inflammation	Immune cells	Ivetic_et_al	https://www.frontiersin.org/articles/10.3389/fimmu.2019.01068/full
45	PEWCY	Mus musculus	ENSMUST00000035938	Ccl5	cell_type_marker	Natural killer cells	Skelly_et_al	https://www.sciencedirect.com/science/article/pii/S2211124717319095
46	PFF77	Mus musculus	ENSMUST00000177715	Ighm	cell_type_marker	Lymphocytes	Galow_et_al	https://www.mdpi.com/2073-4409/9/5/1144/htm
47	PFG43	Mus musculus	ENSMUSG00000026395	Ptprc	cell_type_marker	Immune cells	Skelly_et_al	https://www.sciencedirect.com/science/article/pii/S2211124717319095
48	PFK73	Mus musculus	ENSMUST00000001547	Col1a1	cell_type_marker	Fibroblasts	Forte_et_al	https://www.sciencedirect.com/science/article/pii/S2211124720301625
49	PFWCZ	Mus musculus	ENSMUSG00000030165	Klrd1	cell_type_marker	Natural killer cells	Jin_et_al	https://onlinelibrary.wiley.com/doi/10.1002/smtd.202100752
50	PG35J	Mus musculus	ENSMUSG00000052336	Cx3cr1	cell_type_marker	Monocytes	Forte_et_al	https://www.sciencedirect.com/science/article/pii/S2211124720301625
51	PGK 74.00	Mus musculus	ENSMUSG00000036655	Colec11	cell_type_marker	Pericytes	Skelly_et_al	https://www.sciencedirect.com/science/article/pii/S2211124717319095
52	PGT6X	Mus musculus	ENSMUST00000034973	Smad3	EMT	Endothelial cells	Xu_et_al	https://www.nature.com/articles/cr20095
53	PGWCL	Mus musculus	ENSMUST00000036387	S100b	cell_type_marker	Schwann cells	Forte_et_al	https://www.sciencedirect.com/science/article/pii/S2211124720301625
54	PHG45	Mus musculus	ENSMUSG00000029231	Pdgfra	cell_type_marker	Fibroblasts	Skelly_et_al	https://www.sciencedirect.com/science/article/pii/S2211124717319095#bib1
55	PHM74	Mus musculus	ENSMUST00000062606	Upk3b	cell_type_marker	Epicardial cells	Galow_et_al	https://www.mdpi.com/2073-4409/9/5/1144/htm
56	PHS6Z	Mus musculus	ENSMUST00000028881	Il1b	cell_type_marker	Immune cells	Forte_et_al	https://www.sciencedirect.com/science/article/pii/S2211124720301625
57	PHWC0	Mus musculus	ENSMUST00000039631	Acta2	cell_type_marker	Smooth muscle cells	Galow_et_al	https://www.mdpi.com/2073-4409/9/5/1144/htm
58	PJE9E	Mus musculus	ENSMUST00000042792	Scn7a	cell_type_marker	Fibroblasts	Galow_et_al	https://www.mdpi.com/2073-4409/9/5/1144/htm
59	PJG79	Mus musculus	ENSMUST00000015581	Gzmb	cell_type_marker	Natural killer cells	Skelly_et_al	https://www.sciencedirect.com/science/article/pii/S2211124717319095
60	PJWC1	Mus musculus	ENSMUST00000034590	Tagln	cell_type_marker	Smooth muscle cells	Galow_et_al	https://www.mdpi.com/2073-4409/9/5/1144/htm
61	PJY2Q	Mus musculus	ENSMUSG00000022206	Npr3	cell_type_marker	Endocardial cells	Galow_et_al	https://www.mdpi.com/2073-4409/9/5/1144/htm
62	PK25P	Mus musculus	ENSMUSG00000026069	Il1rl1	inflammation	Cardiomyocytes	Sanada_et_al	https://www.jci.org/articles/view/30634/htm
63	PK95F	Mus musculus	ENSMUSG00000018830	Myh11	cell_type_marker	Smooth muscle cells	Galow_et_al	https://www.mdpi.com/2073-4409/9/5/1144/htm
64	PKWC2	Mus musculus	ENSMUSG00000027985	Lef1	cell_type_marker	Lymphocytes	Skelly_et_al	https://www.sciencedirect.com/science/article/pii/S2211124717319095
65	PMH7A	Mus musculus	ENSMUST00000063062	Chil3	cell_type_marker	Monocytes	Forte_et_al	https://www.sciencedirect.com/science/article/pii/S2211124720301625
66	PMWC3	Mus musculus	ENSMUSG00000048521	Cxcr6	cell_type_marker	Lymphocytes	Jin_et_al	https://onlinelibrary.wiley.com/doi/10.1002/smtd.202100752
67	PN86K	Mus musculus	ENSMUSG00000024620	Pdgfrb	cell_type_marker	Neuronal cells	Galow_et_al	https://www.mdpi.com/2073-4409/9/5/1144/htm
68	PNH7C	Mus musculus	ENSMUSG00000024672	Ms4a7	cell_type_marker	Macrophages	Forte_et_al	https://www.sciencedirect.com/science/article/pii/S2211124720301625
69	PNS62	Mus musculus	ENSMUST00000059352	Lmod1	cell_type_marker	Smooth muscle cells	Skelly_et_al	https://www.sciencedirect.com/science/article/pii/S2211124717319095
70	PPC1C	Mus musculus	ENSMUSG00000053477	Tcf4	cell_type_marker	Dendritic cells	Jin_et_al	https://onlinelibrary.wiley.com/doi/10.1002/smtd.202100752
71	PPT62	Mus musculus	ENSMUSG00000045680	Tcf21	cell_type_marker	Fibroblasts	Forte_et_al	https://www.sciencedirect.com/science/article/pii/S2211124720301625
72	PPWC5	Mus musculus	ENSMUSG00000042453	Reln	cell_type_marker	Endothelial cells	Galow_et_al	https://www.mdpi.com/2073-4409/9/5/1144/htm
73	PQ95K	Mus musculus	ENSMUSG00000018774	Cd68	cell_type_marker	Monocytes	Forte_et_al	https://www.sciencedirect.com/science/article/pii/S2211124720301625
74	PQK7C	Mus musculus	ENSMUST00000020617	Flt4	cell_type_marker	Endothelial cells	Galow_et_al	https://www.mdpi.com/2073-4409/9/5/1144/htm
75	PQR76	Mus musculus	ENSMUST00000026917	Nrp1	EMT	Endothelial cells	Chu_et_al	https://journals.plos.org/plosone/article?id=10.1371/journal.pone.0101931
76	PQT63	Mus musculus	ENSMUST00000002678	Tgfb1	EMT	Endothelial cells	Xu_et_al	https://www.nature.com/articles/cr20095
77	PR66R	Mus musculus	ENSMUST00000034231	Ccl22	cell_type_marker	Dendritic cells	Jin_et_al	https://onlinelibrary.wiley.com/doi/10.1002/smtd.202100752
78	PR81H	Mus musculus	ENSMUSG00000020717	Pecam1	cell_type_marker	Endothelial cells	Forte_et_al	https://www.sciencedirect.com/science/article/pii/S2211124720301625
79	PRJ7E	Mus musculus	ENSMUST00000190262	Ly6g	cell_type_marker	Neutrophils	Kleinholz_et_al	https://www.nature.com/articles/s41598-021-94425-9
80	PRP35	Mus musculus	ENSMUSG00000057329	Bcl2	apoptosis	Cardiomyocytes	Czabotar_et_al	https://www.nature.com/articles/nrm3722
81	PRS65	Mus musculus	ENSMUSG00000040249	Lrp1	WNT_signalling	Cardiomyocytes	Meyer_et_al	https://www.ncbi.nlm.nih.gov/pmc/articles/PMC5582413/
82	PS05Y	Mus musculus	ENSMUSG00000058427	Cxcl2	cell_type_marker	Neutrophils	Forte_et_al	https://www.sciencedirect.com/science/article/pii/S2211124720301625
83	PS56T	Mus musculus	ENSMUST00000102832	Cd3e	cell_type_marker	Lymphocytes	Jin_et_al	https://onlinelibrary.wiley.com/doi/10.1002/smtd.202100752
84	PSN59	Mus musculus	ENSMUSG00000028859	Csf3r	cell_type_marker	Adipocytes	Skelly_et_al	https://www.sciencedirect.com/science/article/pii/S2211124717319095
85	PSWC8	Mus musculus	ENSMUSG00000025746	Il6	inflammation	Fibroblasts	Tombor_et_al	https://www.nature.com/articles/s41467-021-20905-1
86	PT56V	Mus musculus	ENSMUST00000024044	Cd4	cell_type_marker	Lymphocytes	Jin_et_al	https://onlinelibrary.wiley.com/doi/10.1002/smtd.202100752
87	PVF7M	Mus musculus	ENSMUSG00000075122	Cd80	cell_type_marker	Monocytes	Pinto_et_al	https://www.frontiersin.org/journals/immunology/articles/10.3389/fimmu.2018.00454/full
88	PVK3C	Mus musculus	ENSMUSG00000002100	Mybpc3	cell_type_marker	Cardiomyocytes	Litvinuková_et_al	https://www.nature.com/articles/s41586-020-2797-4
89	PVQ37	Mus musculus	ENSMUSG00000026728	Vim	cell_type_marker	EndMA+	Tombor_et_al	https://www.nature.com/articles/s41467-021-20905-1
90	PVT67	Mus musculus	ENSMUST00000068031	Top2a	cell_type_marker	Proliferative cells	Galow_et_al	https://www.mdpi.com/2073-4409/9/5/1144/htm
91	PXF7P	Mus musculus	ENSMUSG00000024610	Cd74	cell_type_marker	Monocytes	Galow_et_al	https://www.mdpi.com/2073-4409/9/5/1144/htm
92	PXM6G	Mus musculus	ENSMUST00000028045	Mrc1	cell_type_marker	Macrophages	Jin_et_al	https://onlinelibrary.wiley.com/doi/10.1002/smtd.202100752
93	PXV24	Mus musculus	ENSMUSG00000024810	Il33	inflammation	Fibroblasts	Forte_et_al	https://www.sciencedirect.com/science/article/pii/S2211124720301625
94	PYJ7M	Mus musculus	ENSMUSG00000037548	H2-DMb2	cell_type_marker	Lymphocytes	Forte_et_al	https://www.sciencedirect.com/science/article/pii/S2211124720301625
95	PYVCF	Mus musculus	ENSMUST00000029076	Car3	cell_type_marker	Adipocytes	Galow_et_al	https://www.mdpi.com/2073-4409/9/5/1144/htm
96	PZ493	Mus musculus	ENSMUST00000022616	Clu	cell_type_marker	Epicardial cells	Forte_et_al	https://www.sciencedirect.com/science/article/pii/S2211124720301625
97	PZ85W	Mus musculus	ENSMUSG00000021109	Hif1a	cell_type_marker	Cardiomyocytes	Forte_et_al	https://www.sciencedirect.com/science/article/pii/S2211124720301625
98	PZF7R	Mus musculus	ENSMUST00000235530	H2-Eb1	cell_type_marker	Lymphocytes	Galow_et_al	https://www.mdpi.com/2073-4409/9/5/1144/htm
99	PZVCG	Mus musculus	ENSMUSG00000061780	Cfd	cell_type_marker	Adipocytes	Galow_et_al	https://www.mdpi.com/2073-4409/9/5/1144/htm
100	PZWCF	Mus musculus	ENSMUST00000003469	Cd79a	cell_type_marker	Lymphocytes	Skelly_et_al	https://www.sciencedirect.com/science/article/pii/S2211124717319095

## Sheet: Supplementary Table 2
Supplementary Table 2: Antibody panel information for Lunaphore COMET, conventional IF and FACS experiments.
Complete list of all primary and secondary antibodies used for sequential immunofluorescence experiments in this study. “Cycle” refers to the imaging cycle the antibody was used in, “Host” is the species the antibody was raised in. Cd11b* = This antibody was used in the imaging but did not pass quality control and was therefore not used in any analysis in this study.
Cycle	Antibody	Type	Channel	Host	Secondary Ab	Dilution	Incubation time (min)	Supplier	Catalog number	Clone number
1	Trem2	primary	Cy5	rabbit	Rabbit-AF647	1:150	4	Abcam	ab245227	EPR23177-106
1	CD68	primary	TRITC	rat	Rat-AF555	1:300	4	Abcam	ab53444	FA-11
2	aSMA	primary	Cy5	rabbit	Rabbit-AF647	1:400	4	Cell Signaling	19245	D4K9N
2	CD11b*	primary	TRITC	rat	Rat-AF555	1:100	4	Thermo Fisher	14-0112-82	M1/70
3	CD31	primary	Cy5	rabbit	Rabbit-AF647	1:250	8	Abcam	ab182981	EPR17259
3	CD45	primary	TRITC	rat	Rat-AF555	1:200	8	Novus Biosciences	NB100-77417	30-F11
4	Ccr2	primary	Cy5	rabbit	Rabbit-AF647	1:250	4	Abcam	ab273050	EPR20844-15
5	Postn	primary	Cy5	rabbit	Rat-AF555	1:300	4	Abcam	ab215199	EPR20806
6	Pdgfra	primary	Cy5	rabbit	Rabbit-AF647	1:500	4	Abcam	ab203491	EPR22059-270
7	Icam1	primary	Cy5	rabbit	Rabbit-AF647	1:300	4	Thermo Fisher	MA5-43363	101
8	LaminB1	primary	Cy5	rabbit	Rabbit-AF647	1:300	4	Abcam	ab133741	EPR8985
9	Mpo	primary	Cy5	rabbit	Rabbit-AF647	1:150	4	Abcam	ab208670	EPR20257
10	Gpnmb	primary	Cy5	rabbit	Rabbit-AF647	1:500	4	Abcam	ab188222	EPR18226-147
11	Ankrd1	primary	Cy5	rabbit	Rabbit-AF647	1:200	4	Thermo Fisher	BS-8074R	X
12	Tnnt2	primary	Cy5	rabbit	Rabbit-AF647	1:3000	2	Thermo Fisher	ab209813	EPR20266
12	WGA-AF555	primary, conjugated	TRITC	none	none	1:250	2	Thermo Fisher	W32464	X
X	Rabbit-AF647	secondary	Cy5	goat	X	1:250	2	Thermo Fisher	A32733	X
X	Rat-AF555	secondary	TRITC	goat	X	1:250	2	Thermo Fisher	A48263	X

## Sheet: Supplementary Table 3
Supplementary Table 3: Primary and secondary antibodies used in conventional immunofluorescence experiments.
Complete list of all primary and secondary antibodies used for conventional immunofluorescence experiments in this study.
Antibody	Dilution	Supplier	Clone
anti-CD45-PerCP-Cy5.5	1:100	BD Biosciences	clone 30-F11
anti-Ter119-PE	1:200	BD Biosciences	clone TER-119
anti-CD4-PE	1:200	Biolegend	clone RM4-5
anti-CD19-PE	1:200	BD Biosciences	clone 1D3
anti-NK1.1-PE	1:200	BD Biosciences	clone PK136
anti-Ly6G-PE	1:100	BD Biosciences	clone 1A8
anti-CD11b-APC-Cy7	1:100	BD Biosciences	clone M1/70
anti-F4/80-PE-Cy7	1:100	Biolegend	clone BM8
anti-Ly6C-APC	1:100	BD Biosciences	clone AL-21

## Sheet: Supplementary Table 4
Supplementary Table 4: Antibodies used in flow cytometry experiments.
Complete list of all antibodies used in flow cytometry experiments in this study.
Antibody name	Antibody type	Host	Dilution	Supplier	Catalog number	Clone number
vWF	Primary	rabbit	1:200	Dako	A0082	Polyclonal
CD41	Primary	rat	1:200	Abcam	ab33661	MWReg30
PSGL-1	Primary	rat	1:200	BioXCell/Biozol	BE0186	4RA10
CCR2	Primary	rabbit	1:150	Abcam	ab273050	EPR20844-15
CD68	Primary	rat	1:200	Abcam	ab245227	FA-11
CD31	Primary	goat	1:600	R&D Systems	AF3628	Polyclonal
anti-Rabbit IgG,Alexa Fluor 555	Secondary	Donkey	1:400	Thermo Fisher Scientific	A-31572
anti-Goat IgG, Alexa Fluor 555	Secondary	Donkey	1:400	Thermo Fisher Scientific	A-21432
anti-Rat IgG, Alexa Fluor 647	Secondary	Donkey	1:400	Thermo Fisher Scientific	A-48272
anti-Rabbit, Alexa Fluor 750	Secondary	Donkey	1:400	Abcam	ab175728
anti-Rabbit IgG, Alexa Fluor 647	Secondary	Goat	1:400	Thermo Fisher Scientific	A-32733
anti-Rabbit IgG, Alexa Fluor 555	Secondary	Goat	1:400	Thermo Fisher Scientific	A-32732
anti-Rat IgG, Alexa Fluor 647	Secondary	Goat	1:400	Thermo Fisher Scientific	A-48265
anti-Rat IgG, Alexa Fluor 555	Secondary	Goat	1:400	Thermo Fisher Scientific	A-48263
