# Supplementary material for: Spatial multiomics of acute myocardial infarction reveals immune cell infiltration through the endocardium
Source: Springer Nature journal article supplement (doi:10.1038/s44161-025-00717-y), 2025-10-03
Supplement: MOESM4 [file 44161_2025_717_MOESM4_ESM.xlsx]

## Sheet: Fig 1D
cellID	X_centroid	Y_centroid	cell_type
sample_2d_r2_s1-cell_1	8515.45	25345.6	Cardiac fibroblasts
sample_2d_r2_s1-cell_2	8436.67	25329.4	Cardiac fibroblasts
sample_2d_r2_s1-cell_5	8467.23	25283.5	Endothelial cells
sample_2d_r2_s1-cell_7	8391.34	25224.6	Myeloid cells
sample_2d_r2_s1-cell_8	8440.74	25230.3	Endothelial cells
sample_2d_r2_s1-cell_10	8328.62	25162.1	Myeloid cells
sample_2d_r2_s1-cell_11	8352.09	25119.7	Cardiac fibroblasts
sample_2d_r2_s1-cell_12	8419.82	25131.7	Cardiac fibroblasts
sample_2d_r2_s1-cell_13	8227.34	25092.4	Myeloid cells
sample_2d_r2_s1-cell_19	8291.89	25009.5	Cardiac fibroblasts
sample_2d_r2_s1-cell_20	8151.61	25045.8	Myeloid cells
sample_2d_r2_s1-cell_24	8056.69	24971.6	Myeloid cells
sample_2d_r2_s1-cell_25	8397.57	24942	Cardiac fibroblasts
sample_2d_r2_s1-cell_26	8184.65	24919.8	Cardiac fibroblasts
sample_2d_r2_s1-cell_28	8298.61	24915	Cardiac fibroblasts
sample_2d_r2_s1-cell_31	8052.82	24888	Cardiomyocytes
sample_2d_r2_s1-cell_34	8221.46	24857.6	Cardiac fibroblasts
sample_2d_r2_s1-cell_36	8135.14	24857	Cardiac fibroblasts
sample_2d_r2_s1-cell_38	7986.87	24839.3	Endothelial cells
sample_2d_r2_s1-cell_39	8539.38	24758.9	Endothelial cells
sample_2d_r2_s1-cell_41	8094.12	24810.8	Endothelial cells
sample_2d_r2_s1-cell_46	8359.34	24775.6	Endothelial cells
sample_2d_r2_s1-cell_47	8453.94	24717	Myeloid cells
sample_2d_r2_s1-cell_48	7889.84	24737.3	Myeloid cells
sample_2d_r2_s1-cell_49	8389.82	24746.8	Myeloid cells
sample_2d_r2_s1-cell_51	7959	24697.3	Myeloid cells
sample_2d_r2_s1-cell_58	7881.55	24661	Pericytes
sample_2d_r2_s1-cell_59	7803.25	24585.7	Myeloid cells
sample_2d_r2_s1-cell_60	7765.14	24623.3	Endothelial cells
sample_2d_r2_s1-cell_61	8425.27	24594.3	Cardiac fibroblasts
sample_2d_r2_s1-cell_66	7880.67	24531	Myeloid cells
sample_2d_r2_s1-cell_68	8063.2	24556.9	Endothelial cells
sample_2d_r2_s1-cell_69	8234.52	24540.1	Myeloid cells
sample_2d_r2_s1-cell_70	8133.48	24575	Endothelial cells
sample_2d_r2_s1-cell_71	7689.31	24536.1	Myeloid cells
sample_2d_r2_s1-cell_73	7966.74	24527.3	Endothelial cells
sample_2d_r2_s1-cell_78	7569.76	24514.3	Cardiac fibroblasts
sample_2d_r2_s1-cell_80	7574.54	24459.7	Myeloid cells
sample_2d_r2_s1-cell_82	7799.86	24475.2	Endothelial cells
sample_2d_r2_s1-cell_87	7656.4	24410.1	Myeloid cells
sample_2d_r2_s1-cell_88	8164.9	24401.8	Myeloid cells
sample_2d_r2_s1-cell_89	7482.75	24432.5	Cardiac fibroblasts
sample_2d_r2_s1-cell_91	8390.1	24386.4	Cardiac fibroblasts
sample_2d_r2_s1-cell_94	7429.53	24381.1	Cardiac fibroblasts
sample_2d_r2_s1-cell_96	7572.1	24392.2	Myeloid cells
sample_2d_r2_s1-cell_97	7385.74	24376.2	Cardiac fibroblasts
sample_2d_r2_s1-cell_98	7504.78	24351.4	Myeloid cells
sample_2d_r2_s1-cell_99	7970.6	24326.3	Cardiac fibroblasts
sample_2d_r2_s1-cell_100	7665.55	24290.4	Endothelial cells
sample_2d_r2_s1-cell_101	7396.51	24245.4	Cardiac fibroblasts
sample_2d_r2_s1-cell_102	8181.86	24278.4	Myeloid cells
sample_2d_r2_s1-cell_103	7317.17	24296.4	Cardiac fibroblasts
sample_2d_r2_s1-cell_104	7841.56	24311.7	Myeloid cells
sample_2d_r2_s1-cell_105	7552.83	24296.9	Myeloid cells
sample_2d_r2_s1-cell_107	8397.85	24237	Cardiac fibroblasts
sample_2d_r2_s1-cell_109	7870.87	24239.5	Cardiac fibroblasts
sample_2d_r2_s1-cell_110	7773.74	24212.5	Endothelial cells
sample_2d_r2_s1-cell_112	7521.26	24198.1	Endothelial cells
sample_2d_r2_s1-cell_113	7264.79	24202.8	Endothelial cells
sample_2d_r2_s1-cell_118	7630.91	24157.3	Myeloid cells
sample_2d_r2_s1-cell_119	7858.35	24176.3	Myeloid cells
sample_2d_r2_s1-cell_123	7689.1	24113.8	Cardiac fibroblasts
sample_2d_r2_s1-cell_125	8265.14	24137.6	Endothelial cells
sample_2d_r2_s1-cell_127	7797.24	24114.5	Myeloid cells
sample_2d_r2_s1-cell_128	7391.41	24064.3	Cardiac fibroblasts
sample_2d_r2_s1-cell_129	7996.51	24027.7	Myeloid cells
sample_2d_r2_s1-cell_130	7504.24	24101	Endothelial cells
sample_2d_r2_s1-cell_131	8160.38	24059.7	Myeloid cells
sample_2d_r2_s1-cell_134	7586.27	24035.9	Cardiac fibroblasts
sample_2d_r2_s1-cell_135	7755.44	24016.3	Myeloid cells
sample_2d_r2_s1-cell_136	7178.11	24057	Myeloid cells
sample_2d_r2_s1-cell_138	7894.22	24020.2	Myeloid cells
sample_2d_r2_s1-cell_140	7231.03	24011.2	Cardiac fibroblasts
sample_2d_r2_s1-cell_143	7525.14	23974.2	Myeloid cells
sample_2d_r2_s1-cell_146	7113.5	23978.1	Cardiac fibroblasts
sample_2d_r2_s1-cell_149	7271.5	23951.5	Endothelial cells
sample_2d_r2_s1-cell_151	7905.33	23983.5	Myeloid cells
sample_2d_r2_s1-cell_154	7642.21	23935.3	Myeloid cells
sample_2d_r2_s1-cell_159	7181.54	23905.8	Cardiac fibroblasts
sample_2d_r2_s1-cell_161	7077.34	23921.9	Myeloid cells
sample_2d_r2_s1-cell_162	7751.33	23846.7	Cardiac fibroblasts
sample_2d_r2_s1-cell_166	7034.61	23877.1	Myeloid cells
sample_2d_r2_s1-cell_167	8382.97	23913.5	Smooth muscle cells
sample_2d_r2_s1-cell_172	8183.73	23873	Myeloid cells
sample_2d_r2_s1-cell_174	8281.47	23866.7	Smooth muscle cells
sample_2d_r2_s1-cell_176	7220.76	23819.5	Cardiac fibroblasts
sample_2d_r2_s1-cell_180	8151.6	23767.6	Smooth muscle cells
sample_2d_r2_s1-cell_182	7155.53	23796.7	Endothelial cells
sample_2d_r2_s1-cell_183	8112.66	23789.7	Cardiac fibroblasts
sample_2d_r2_s1-cell_185	6991.98	23783.8	Endothelial cells
sample_2d_r2_s1-cell_186	6951.37	23796.7	Cardiac fibroblasts
sample_2d_r2_s1-cell_187	7021.52	23739.7	Myeloid cells
sample_2d_r2_s1-cell_189	7210.82	23703.2	Myeloid cells
sample_2d_r2_s1-cell_194	6940.4	23746.4	Cardiac fibroblasts
sample_2d_r2_s1-cell_195	7116.97	23714	Endothelial cells
sample_2d_r2_s1-cell_197	6896.58	23717.1	Cardiac fibroblasts
sample_2d_r2_s1-cell_203	6969.05	23646.5	Cardiac fibroblasts
sample_2d_r2_s1-cell_205	8113.15	23678.4	Smooth muscle cells
sample_2d_r2_s1-cell_210	8073.04	23651.2	Cardiac fibroblasts
sample_2d_r2_s1-cell_211	8097.92	23626.3	Smooth muscle cells
sample_2d_r2_s1-cell_213	7077.17	23619.4	Endothelial cells
sample_2d_r2_s1-cell_214	8127.03	23603.6	Smooth muscle cells
sample_2d_r2_s1-cell_222	6864	23542.7	Cardiac fibroblasts
sample_2d_r2_s1-cell_223	6507.96	23546.5	Myeloid cells
sample_2d_r2_s1-cell_226	8080.47	23531.6	Smooth muscle cells
sample_2d_r2_s1-cell_230	8114.65	23521.9	Smooth muscle cells
sample_2d_r2_s1-cell_234	7055.03	23462.2	Cardiac fibroblasts
sample_2d_r2_s1-cell_237	8001.72	23505.6	Cardiac fibroblasts
sample_2d_r2_s1-cell_238	8055.96	23472.3	Cardiac fibroblasts
sample_2d_r2_s1-cell_239	6521.96	23465.1	Myeloid cells
sample_2d_r2_s1-cell_241	6919.4	23479.7	Cardiac fibroblasts
sample_2d_r2_s1-cell_243	6971.28	23482	Pericytes
sample_2d_r2_s1-cell_246	7960.72	23428.7	Cardiac fibroblasts
sample_2d_r2_s1-cell_249	6906.21	23366.7	Cardiac fibroblasts
sample_2d_r2_s1-cell_251	6455.54	23434.7	Cardiac fibroblasts
sample_2d_r2_s1-cell_252	7992.03	23378.6	Myeloid cells
sample_2d_r2_s1-cell_254	8088.77	23362.5	Cardiac fibroblasts
sample_2d_r2_s1-cell_266	7074.28	23314.1	Cardiac fibroblasts
sample_2d_r2_s1-cell_267	7216.2	23333.4	Endothelial cells
sample_2d_r2_s1-cell_273	8322.37	23336.9	Endothelial cells
sample_2d_r2_s1-cell_275	8210.96	23307.8	Smooth muscle cells
sample_2d_r2_s1-cell_276	8062.35	23312.9	Cardiac fibroblasts
sample_2d_r2_s1-cell_282	6789.6	23280.1	Endothelial cells
sample_2d_r2_s1-cell_284	8162.16	23281.8	Cardiac fibroblasts
sample_2d_r2_s1-cell_286	8276.3	23273.1	Smooth muscle cells
sample_2d_r2_s1-cell_288	6529.13	23238.1	Cardiac fibroblasts
sample_2d_r2_s1-cell_296	7035.08	23216	Cardiac fibroblasts
sample_2d_r2_s1-cell_297	8345.08	23259.4	Smooth muscle cells
sample_2d_r2_s1-cell_298	8217.11	23237.2	Pericytes
sample_2d_r2_s1-cell_300	6962.38	23232	Cardiac fibroblasts
sample_2d_r2_s1-cell_304	6244.77	23229.4	Cardiac fibroblasts
sample_2d_r2_s1-cell_306	8252.11	23243.2	Smooth muscle cells
sample_2d_r2_s1-cell_309	8364.67	23213.8	Smooth muscle cells
sample_2d_r2_s1-cell_313	8322.95	23209.1	Cardiac fibroblasts
sample_2d_r2_s1-cell_314	8174.26	23210.3	Cardiac fibroblasts
sample_2d_r2_s1-cell_317	8409.77	23201.4	Pericytes
sample_2d_r2_s1-cell_318	8241.92	23200.4	Cardiac fibroblasts
sample_2d_r2_s1-cell_320	6189.25	23177.9	Cardiac fibroblasts
sample_2d_r2_s1-cell_322	6951.31	23185	Cardiac fibroblasts
sample_2d_r2_s1-cell_323	6507.89	23138.5	Cardiac fibroblasts
sample_2d_r2_s1-cell_324	6813.19	23172	Endothelial cells
sample_2d_r2_s1-cell_326	6870.69	23170.6	Endothelial cells
sample_2d_r2_s1-cell_340	6887.85	23131	Myeloid cells
sample_2d_r2_s1-cell_344	7389.49	22976.7	Myeloid cells
sample_2d_r2_s1-cell_370	6896.86	23013.4	Endothelial cells
sample_2d_r2_s1-cell_375	6555.34	22987.8	Cardiac fibroblasts
sample_2d_r2_s1-cell_376	6803.47	22987.3	Cardiac fibroblasts
sample_2d_r2_s1-cell_390	6920.34	22929	Cardiac fibroblasts
sample_2d_r2_s1-cell_397	6480.11	22922.3	Endothelial cells
sample_2d_r2_s1-cell_406	7561.81	22888.2	Myeloid cells
sample_2d_r2_s1-cell_411	6840.43	22885.3	Endothelial cells
sample_2d_r2_s1-cell_416	6878.76	22865.5	Pericytes
sample_2d_r2_s1-cell_417	7738.84	22838.2	Myeloid cells
sample_2d_r2_s1-cell_427	6830.06	22824.4	Pericytes
sample_2d_r2_s1-cell_429	6617.52	22827.9	Endothelial cells
sample_2d_r2_s1-cell_430	5826.13	22802.1	Myeloid cells
sample_2d_r2_s1-cell_434	7521.84	22757.7	Cardiac fibroblasts
sample_2d_r2_s1-cell_442	6364.91	22741	Cardiac fibroblasts
sample_2d_r2_s1-cell_444	6451.54	22731.8	Myeloid cells
sample_2d_r2_s1-cell_446	5765.15	22740.8	Cardiac fibroblasts
sample_2d_r2_s1-cell_447	6030.82	22646.7	Myeloid cells
sample_2d_r2_s1-cell_449	7028.16	22695.9	Myeloid cells
sample_2d_r2_s1-cell_450	6299.28	22738.4	Cardiac fibroblasts
sample_2d_r2_s1-cell_453	5841.41	22679.4	Cardiac fibroblasts
sample_2d_r2_s1-cell_462	6202.13	22596.3	Cardiac fibroblasts
sample_2d_r2_s1-cell_467	5686.2	22672.9	Cardiac fibroblasts
sample_2d_r2_s1-cell_468	6399.74	22691.1	Cardiac fibroblasts
sample_2d_r2_s1-cell_470	6348.64	22691.1	Pericytes
sample_2d_r2_s1-cell_471	7163.71	22643.8	Myeloid cells
sample_2d_r2_s1-cell_475	5728.7	22634.6	Myeloid cells
sample_2d_r2_s1-cell_480	8396.73	22544.8	Myeloid cells
sample_2d_r2_s1-cell_484	6617.22	22602.3	Endothelial cells
sample_2d_r2_s1-cell_486	5606.13	22603.7	Cardiac fibroblasts
sample_2d_r2_s1-cell_489	7168.73	22542.4	Pericytes
sample_2d_r2_s1-cell_492	7043.77	22556.8	Cardiac fibroblasts
sample_2d_r2_s1-cell_493	6073.59	22589.8	Endothelial cells
sample_2d_r2_s1-cell_496	5643.75	22567.6	Endothelial cells
sample_2d_r2_s1-cell_499	7279.83	22526.8	Myeloid cells
sample_2d_r2_s1-cell_502	5691.19	22505.8	Cardiomyocytes
sample_2d_r2_s1-cell_503	5907.97	22557.1	Endothelial cells
sample_2d_r2_s1-cell_505	8494.59	22403	Lymphoid cells
sample_2d_r2_s1-cell_511	5559.41	22508.9	Cardiac fibroblasts
sample_2d_r2_s1-cell_515	5870.95	22507.5	Myeloid cells
sample_2d_r2_s1-cell_518	5516.92	22510.9	Myeloid cells
sample_2d_r2_s1-cell_523	5748.92	22411.6	Myeloid cells
sample_2d_r2_s1-cell_527	6114.81	22430.6	Myeloid cells
sample_2d_r2_s1-cell_536	5862.64	22374.6	Myeloid cells
sample_2d_r2_s1-cell_540	5971.71	22415.7	Myeloid cells
sample_2d_r2_s1-cell_541	8402.57	22426.6	Myeloid cells
sample_2d_r2_s1-cell_545	7134.97	22441.8	Cardiac fibroblasts
sample_2d_r2_s1-cell_547	5448.39	22379.8	Cardiac fibroblasts
sample_2d_r2_s1-cell_548	7033.61	22351.1	Myeloid cells
sample_2d_r2_s1-cell_550	8017.14	22325	Cardiac fibroblasts
sample_2d_r2_s1-cell_551	5538.51	22370.8	Cardiomyocytes
sample_2d_r2_s1-cell_554	8298.85	22371.1	Endothelial cells
sample_2d_r2_s1-cell_555	6374.17	22314.6	Myeloid cells
sample_2d_r2_s1-cell_557	8367.06	22368.3	Endothelial cells
sample_2d_r2_s1-cell_561	6015.04	22339.1	Myeloid cells
sample_2d_r2_s1-cell_562	6910.68	22336.1	Cardiac fibroblasts
sample_2d_r2_s1-cell_566	5962.64	22297	Endothelial cells
sample_2d_r2_s1-cell_570	8100.1	22281.9	Myeloid cells
sample_2d_r2_s1-cell_572	5764.82	22320.7	Endothelial cells
sample_2d_r2_s1-cell_576	8364	22300.5	Lymphoid cells
sample_2d_r2_s1-cell_578	5496.09	22261.3	Endothelial cells
sample_2d_r2_s1-cell_580	5677.13	22238.5	Cardiomyocytes
sample_2d_r2_s1-cell_581	6495.96	22173.5	Cardiac fibroblasts
sample_2d_r2_s1-cell_584	5814.49	22267.4	Endothelial cells
sample_2d_r2_s1-cell_585	8326.26	22253.8	Cardiac fibroblasts
sample_2d_r2_s1-cell_588	5901.24	22208.3	Endothelial cells
sample_2d_r2_s1-cell_589	8397.24	22219.7	Cardiac fibroblasts
sample_2d_r2_s1-cell_593	8506.26	22221.3	Myeloid cells
sample_2d_r2_s1-cell_599	5404.82	22148.2	Cardiomyocytes
sample_2d_r2_s1-cell_600	8020.79	22186.4	Cardiac fibroblasts
sample_2d_r2_s1-cell_602	5555.36	22176.2	Endothelial cells
sample_2d_r2_s1-cell_604	6212.66	22175.1	Endothelial cells
sample_2d_r2_s1-cell_605	5777.07	22152.1	Endothelial cells
sample_2d_r2_s1-cell_607	6275.77	22126.5	Myeloid cells
sample_2d_r2_s1-cell_614	5970.68	22122.1	Endothelial cells
sample_2d_r2_s1-cell_617	8367.46	22134	Myeloid cells
sample_2d_r2_s1-cell_618	6109.04	22112.5	Cardiac fibroblasts
sample_2d_r2_s1-cell_624	8283.67	22078.1	Myeloid cells
sample_2d_r2_s1-cell_625	5647.54	22141.8	Endothelial cells
sample_2d_r2_s1-cell_627	5552.38	22045.4	Cardiac fibroblasts
sample_2d_r2_s1-cell_632	5604.68	22108.4	Endothelial cells
sample_2d_r2_s1-cell_640	5980.26	22051.3	Smooth muscle cells
sample_2d_r2_s1-cell_645	6071.32	22000.5	Cardiac fibroblasts
sample_2d_r2_s1-cell_650	6723.3	22006.6	Myeloid cells
sample_2d_r2_s1-cell_651	7204.49	22011.8	Endothelial cells
sample_2d_r2_s1-cell_652	6411.46	21985.8	Endothelial cells
sample_2d_r2_s1-cell_656	8324.19	22014.3	Myeloid cells
sample_2d_r2_s1-cell_669	5924.24	21974.9	Endothelial cells
sample_2d_r2_s1-cell_671	6712.79	21873.2	Endothelial cells
sample_2d_r2_s1-cell_675	5857.35	21932	Endothelial cells
sample_2d_r2_s1-cell_683	6527.82	21864.2	Myeloid cells
sample_2d_r2_s1-cell_685	5901.21	21917.5	Endothelial cells
sample_2d_r2_s1-cell_689	6011.86	21873.2	Myeloid cells
sample_2d_r2_s1-cell_691	6447.81	21916	Endothelial cells
sample_2d_r2_s1-cell_692	6244.25	21879.4	Myeloid cells
sample_2d_r2_s1-cell_698	6396.09	21875.2	Myeloid cells
sample_2d_r2_s1-cell_699	5031.6	21890.2	Myeloid cells
sample_2d_r2_s1-cell_707	5801.28	21843.7	Myeloid cells
sample_2d_r2_s1-cell_708	4987.78	21761.8	Myeloid cells
sample_2d_r2_s1-cell_716	6172.53	21754.3	Pericytes
sample_2d_r2_s1-cell_717	6279.99	21756.6	Endothelial cells
sample_2d_r2_s1-cell_732	4952.28	21755	Cardiac fibroblasts
sample_2d_r2_s1-cell_744	5835.3	21702	Cardiac fibroblasts
sample_2d_r2_s1-cell_764	4996.92	21603.6	Cardiomyocytes
sample_2d_r2_s1-cell_768	4938.42	21620.3	Myeloid cells
sample_2d_r2_s1-cell_774	4874.48	21598.3	Cardiac fibroblasts
sample_2d_r2_s1-cell_792	5046.23	21466.5	Endothelial cells
sample_2d_r2_s1-cell_804	4868.94	21502.4	Cardiac fibroblasts
sample_2d_r2_s1-cell_842	4949.27	21339.3	Cardiac fibroblasts
sample_2d_r2_s1-cell_865	8390.24	21323.3	Myeloid cells
sample_2d_r2_s1-cell_871	8323.1	21302.4	Myeloid cells
sample_2d_r2_s1-cell_906	5182.19	21168.3	Endothelial cells
sample_2d_r2_s1-cell_924	8169.87	21172.4	Cardiac fibroblasts
sample_2d_r2_s1-cell_925	4516.12	21142.6	Cardiac fibroblasts
sample_2d_r2_s1-cell_932	5325.65	21137.6	Cardiomyocytes Nppa+
sample_2d_r2_s1-cell_933	5079.32	21087.3	Myeloid cells
sample_2d_r2_s1-cell_939	4972.54	21095.2	Myeloid cells
sample_2d_r2_s1-cell_954	4722.1	21088.8	Endothelial cells
sample_2d_r2_s1-cell_983	5389.05	21049.9	Cardiomyocytes Nppa+
sample_2d_r2_s1-cell_984	5331.1	21028.2	Cardiomyocytes Nppa+
sample_2d_r2_s1-cell_990	5362.43	20979.5	Cardiomyocytes Nppa+
sample_2d_r2_s1-cell_991	4685.95	21009.8	Endothelial cells
sample_2d_r2_s1-cell_998	4694.78	20910.9	Endothelial cells
sample_2d_r2_s1-cell_1024	5320.75	20920.1	Cardiomyocytes Nppa+
sample_2d_r2_s1-cell_1035	5223.27	20882.6	Cardiomyocytes Nppa+
sample_2d_r2_s1-cell_1048	4540.64	20845.3	Cardiac fibroblasts
sample_2d_r2_s1-cell_1074	5074.6	20809.5	Endothelial cells
sample_2d_r2_s1-cell_1097	4988.97	20731.3	Myeloid cells
sample_2d_r2_s1-cell_1113	4523.21	20742.6	Cardiac fibroblasts
sample_2d_r2_s1-cell_1121	4831.77	20704.2	Cardiac fibroblasts
sample_2d_r2_s1-cell_1143	4496.58	20611.1	Cardiac fibroblasts
sample_2d_r2_s1-cell_1154	4635.4	20658.3	Cardiac fibroblasts
sample_2d_r2_s1-cell_1185	4742.19	20598.8	Endothelial cells
sample_2d_r2_s1-cell_1186	4347.88	20596.4	Myeloid cells
sample_2d_r2_s1-cell_1190	4640.59	20583.3	Endothelial cells
sample_2d_r2_s1-cell_1201	4570.67	20499.4	Myeloid cells
sample_2d_r2_s1-cell_1222	4333.5	20491.1	Cardiac fibroblasts
sample_2d_r2_s1-cell_1259	4449.45	20326.9	Endothelial cells
sample_2d_r2_s1-cell_1263	4315.25	20387.2	Cardiac fibroblasts
sample_2d_r2_s1-cell_1265	4599.77	20413.1	Endothelial cells
sample_2d_r2_s1-cell_1277	4996.48	20330.9	Cardiac fibroblasts
sample_2d_r2_s1-cell_1282	4572.56	20347.9	Pericytes
sample_2d_r2_s1-cell_1329	4744.64	20264.8	Endothelial cells
sample_2d_r2_s1-cell_1344	4814.1	20167.1	Cardiac fibroblasts
sample_2d_r2_s1-cell_1363	4642.8	20120	Endothelial cells
sample_2d_r2_s1-cell_1366	4577.18	20141.6	Endothelial cells
sample_2d_r2_s1-cell_1380	4319.01	20123.7	Endothelial cells
sample_2d_r2_s1-cell_1382	8496.81	20088.1	Myeloid cells
sample_2d_r2_s1-cell_1394	4815.47	20060.7	Endothelial cells
sample_2d_r2_s1-cell_1397	4488.22	20046.5	Cardiac fibroblasts
sample_2d_r2_s1-cell_1416	8519.18	20005.7	Myeloid cells
sample_2d_r2_s1-cell_1435	4327.31	19962.8	Endothelial cells
sample_2d_r2_s1-cell_1436	4379.92	19989	Pericytes
sample_2d_r2_s1-cell_1441	8353.2	19970.1	Myeloid cells
sample_2d_r2_s1-cell_1455	4629.74	19939.1	Pericytes
sample_2d_r2_s1-cell_1461	4430.92	19929	Endothelial cells
sample_2d_r2_s1-cell_1463	4550.07	19877.2	Cardiac fibroblasts
sample_2d_r2_s1-cell_1508	4627.56	19737.2	Cardiac fibroblasts
sample_2d_r2_s1-cell_1575	4870.95	19606.3	Cardiac fibroblasts
sample_2d_r2_s1-cell_1599	7495.27	19501.3	Myeloid cells
sample_2d_r2_s1-cell_1602	8079.41	19473.5	Myeloid cells
sample_2d_r2_s1-cell_1607	8164.92	19506.1	Myeloid cells
sample_2d_r2_s1-cell_1651	7420.97	19407.9	Myeloid cells
sample_2d_r2_s1-cell_1653	5749.52	19345	Cardiac fibroblasts
sample_2d_r2_s1-cell_1662	7358.89	19355.1	Myeloid cells
sample_2d_r2_s1-cell_1681	7305.03	19331.9	Endothelial cells
sample_2d_r2_s1-cell_1708	7210.27	19241.7	Myeloid cells
sample_2d_r2_s1-cell_1709	7262.77	19239	Myeloid cells
sample_2d_r2_s1-cell_1714	3532.33	19213.3	Cardiac fibroblasts
sample_2d_r2_s1-cell_1716	3206.57	19232.4	Myeloid cells
sample_2d_r2_s1-cell_1717	3630.71	19218.7	Endothelial cells
sample_2d_r2_s1-cell_1738	7158.32	19213	Myeloid cells
sample_2d_r2_s1-cell_1740	5665.45	19180.2	Cardiac fibroblasts
sample_2d_r2_s1-cell_1742	3407.46	19192.7	Cardiac fibroblasts
sample_2d_r2_s1-cell_1763	7177.52	19155.1	Myeloid cells
sample_2d_r2_s1-cell_1764	3445.52	19117	Cardiac fibroblasts
sample_2d_r2_s1-cell_1765	3511.27	19076.9	Cardiomyocytes
sample_2d_r2_s1-cell_1768	8529.83	19168.1	Cardiac fibroblasts
sample_2d_r2_s1-cell_1773	3581.82	19151.6	Endothelial cells
sample_2d_r2_s1-cell_1775	6442.61	19081.8	Myeloid cells
sample_2d_r2_s1-cell_1777	7601.01	19093.7	Myeloid cells
sample_2d_r2_s1-cell_1783	6255.99	19074.9	Myeloid cells
sample_2d_r2_s1-cell_1788	8514.88	19067.3	Cardiomyocytes
sample_2d_r2_s1-cell_1789	2987.37	19109.9	Endothelial cells
sample_2d_r2_s1-cell_1801	3556.39	18945	Endothelial cells
sample_2d_r2_s1-cell_1803	8431.88	19092.5	Myeloid cells
sample_2d_r2_s1-cell_1809	4569.26	19052.2	Cardiac fibroblasts
sample_2d_r2_s1-cell_1824	3631.53	19026	Endothelial cells
sample_2d_r2_s1-cell_1830	2772.7	18978.7	Endothelial cells
sample_2d_r2_s1-cell_1833	3433.33	18917.1	Endothelial cells
sample_2d_r2_s1-cell_1836	2884.84	19000	Endothelial cells
sample_2d_r2_s1-cell_1860	6181.64	18935	Myeloid cells
sample_2d_r2_s1-cell_1864	3396.71	18972.7	Endothelial cells
sample_2d_r2_s1-cell_1887	6600.85	18953.3	Myeloid cells
sample_2d_r2_s1-cell_1902	3860.94	18928.1	Endothelial cells
sample_2d_r2_s1-cell_1910	3375.45	18903.2	Myeloid cells
sample_2d_r2_s1-cell_1926	3873.23	18865.1	Cardiac fibroblasts
sample_2d_r2_s1-cell_1941	8508.67	18794.8	Cardiomyocytes
sample_2d_r2_s1-cell_1960	3427.92	18795.5	Endothelial cells
sample_2d_r2_s1-cell_1961	2683.58	18808.2	Cardiac fibroblasts
sample_2d_r2_s1-cell_1973	3821.28	18738.6	Endothelial cells
sample_2d_r2_s1-cell_1979	6853.18	18687	Myeloid cells
sample_2d_r2_s1-cell_1986	4142.92	18763	Cardiac fibroblasts
sample_2d_r2_s1-cell_1997	2634.13	18743.6	Myeloid cells
sample_2d_r2_s1-cell_1998	3475.81	18738.2	Cardiac fibroblasts
sample_2d_r2_s1-cell_2011	8450.34	18625.6	Myeloid cells
sample_2d_r2_s1-cell_2020	3389.02	18663.5	Endothelial cells
sample_2d_r2_s1-cell_2042	2594.58	18676.7	Cardiac fibroblasts
sample_2d_r2_s1-cell_2060	5979.43	18582.7	Myeloid cells
sample_2d_r2_s1-cell_2077	2566.72	18609.7	Myeloid cells
sample_2d_r2_s1-cell_2078	3657.64	18544.6	Endothelial cells
sample_2d_r2_s1-cell_2094	3595.64	18549.9	Cardiac fibroblasts
sample_2d_r2_s1-cell_2108	7582.2	18550.8	Endothelial cells
sample_2d_r2_s1-cell_2109	3511.04	18555.6	Cardiac fibroblasts
sample_2d_r2_s1-cell_2121	7780.22	18526.5	Myeloid cells
sample_2d_r2_s1-cell_2127	7840.02	18465.9	Cardiac fibroblasts
sample_2d_r2_s1-cell_2128	3516.05	18507.2	Cardiac fibroblasts
sample_2d_r2_s1-cell_2133	2501.01	18500.6	Cardiac fibroblasts
sample_2d_r2_s1-cell_2137	3378.53	18526.4	Endothelial cells
sample_2d_r2_s1-cell_2145	7968.02	18476.1	Myeloid cells
sample_2d_r2_s1-cell_2151	8546.79	18505	Cardiac fibroblasts
sample_2d_r2_s1-cell_2153	4679.1	18466.5	Cardiac fibroblasts
sample_2d_r2_s1-cell_2164	3446.13	18438.1	Cardiac fibroblasts
sample_2d_r2_s1-cell_2171	2539.9	18416.4	Cardiac fibroblasts
sample_2d_r2_s1-cell_2176	3572.73	18350.8	Endothelial cells
sample_2d_r2_s1-cell_2201	3496.36	18366.3	Cardiac fibroblasts
sample_2d_r2_s1-cell_2209	7867.35	18396	Cardiac fibroblasts
sample_2d_r2_s1-cell_2214	2673.31	18393.9	Endothelial cells
sample_2d_r2_s1-cell_2223	3671.76	18338.5	Endothelial cells
sample_2d_r2_s1-cell_2247	7715.12	18297	Cardiac fibroblasts
sample_2d_r2_s1-cell_2251	7799.3	18281.4	Cardiac fibroblasts
sample_2d_r2_s1-cell_2254	7001.82	18307.9	Cardiac fibroblasts
sample_2d_r2_s1-cell_2259	3393.04	18304.1	Endothelial cells
sample_2d_r2_s1-cell_2262	7086.1	18276.9	Myeloid cells
sample_2d_r2_s1-cell_2269	2509.21	18254.8	Endothelial cells
sample_2d_r2_s1-cell_2271	7655.24	18296.2	Cardiac fibroblasts
sample_2d_r2_s1-cell_2288	7639.26	18256.8	Cardiac fibroblasts
sample_2d_r2_s1-cell_2290	7579.87	18245.1	Myeloid cells
sample_2d_r2_s1-cell_2294	3962.19	18094.7	Cardiac fibroblasts
sample_2d_r2_s1-cell_2305	2417.22	18167.7	Endothelial cells
sample_2d_r2_s1-cell_2310	7336.94	18194	Cardiac fibroblasts
sample_2d_r2_s1-cell_2326	7605.09	18130.2	Myeloid cells
sample_2d_r2_s1-cell_2330	7744.1	18172.8	Cardiac fibroblasts
sample_2d_r2_s1-cell_2332	7415.56	18166.4	Cardiac fibroblasts
sample_2d_r2_s1-cell_2339	6827.59	18168.4	Myeloid cells
sample_2d_r2_s1-cell_2351	7859.37	18160.6	Cardiac fibroblasts
sample_2d_r2_s1-cell_2354	6623.82	18164.7	Myeloid cells
sample_2d_r2_s1-cell_2357	7698.38	18122.1	Cardiomyocytes Nppa+
sample_2d_r2_s1-cell_2358	8108.3	18114.9	Cardiomyocytes Nppa+
sample_2d_r2_s1-cell_2363	2537.68	18098.5	Cardiac fibroblasts
sample_2d_r2_s1-cell_2364	7949.27	18141.5	Cardiac fibroblasts
sample_2d_r2_s1-cell_2375	6751	18125.7	Myeloid cells
sample_2d_r2_s1-cell_2380	6669.09	18135.2	Cardiac fibroblasts
sample_2d_r2_s1-cell_2381	8174.26	18060.7	Cardiomyocytes Nppa+
sample_2d_r2_s1-cell_2383	4910.91	18054.9	Myeloid cells
sample_2d_r2_s1-cell_2385	2592.85	18100.9	Endothelial cells
sample_2d_r2_s1-cell_2386	8001.68	18103.6	Endothelial cells
sample_2d_r2_s1-cell_2393	7191.29	18095.4	Endothelial cells
sample_2d_r2_s1-cell_2400	7441.52	18048	Cardiac fibroblasts
sample_2d_r2_s1-cell_2401	7826.81	18071.9	Cardiomyocytes
sample_2d_r2_s1-cell_2409	3778.72	17989.9	Cardiac fibroblasts
sample_2d_r2_s1-cell_2410	8509.94	18058.3	Cardiomyocytes Nppa+
sample_2d_r2_s1-cell_2413	7656.36	18039.9	Cardiac fibroblasts
sample_2d_r2_s1-cell_2420	7948.69	18060.4	Cardiac fibroblasts
sample_2d_r2_s1-cell_2421	7725.02	18063.4	Myeloid cells
sample_2d_r2_s1-cell_2425	6187.25	18022.9	Myeloid cells
sample_2d_r2_s1-cell_2430	3474.16	18043.6	Endothelial cells
sample_2d_r2_s1-cell_2438	3977.94	18023	Cardiac fibroblasts
sample_2d_r2_s1-cell_2440	2527.4	18005	Cardiac fibroblasts
sample_2d_r2_s1-cell_2447	7594.7	18026.2	Cardiac fibroblasts
sample_2d_r2_s1-cell_2449	2305.23	18019.5	Endothelial cells
sample_2d_r2_s1-cell_2452	7170.17	18025.3	Cardiac fibroblasts
sample_2d_r2_s1-cell_2454	7886.26	18016.1	Cardiac fibroblasts
sample_2d_r2_s1-cell_2455	8060.34	17983.2	Lymphoid cells
sample_2d_r2_s1-cell_2457	7252.16	18029.7	Cardiac fibroblasts
sample_2d_r2_s1-cell_2461	7171.52	17965.3	Cardiac fibroblasts
sample_2d_r2_s1-cell_2464	7873.05	17945.2	Cardiomyocytes Nppa+
sample_2d_r2_s1-cell_2465	2392.45	17970.5	Cardiac fibroblasts
sample_2d_r2_s1-cell_2468	7351.64	17988.7	Cardiac fibroblasts
sample_2d_r2_s1-cell_2471	8518.56	17936.8	Cardiomyocytes Nppa+
sample_2d_r2_s1-cell_2474	7269.03	17987.3	Cardiac fibroblasts
sample_2d_r2_s1-cell_2477	7991.72	17908.3	Cardiomyocytes Nppa+
sample_2d_r2_s1-cell_2478	2413.03	17919	Endothelial cells
sample_2d_r2_s1-cell_2481	7482.09	17970	Cardiomyocytes Nppa+
sample_2d_r2_s1-cell_2486	3938.2	17888.4	Cardiac fibroblasts
sample_2d_r2_s1-cell_2488	7055.06	17895.9	Lymphoid cells
sample_2d_r2_s1-cell_2489	7434.09	17965.9	Cardiac fibroblasts
sample_2d_r2_s1-cell_2490	7518.25	17898.8	Cardiomyocytes Nppa+
sample_2d_r2_s1-cell_2492	2574.49	17881.8	Cardiac fibroblasts
sample_2d_r2_s1-cell_2495	2292.15	17959.1	Endothelial cells
sample_2d_r2_s1-cell_2506	4822.88	17911.8	Myeloid cells
sample_2d_r2_s1-cell_2508	7193.03	17882.9	Cardiomyocytes Nppa+
sample_2d_r2_s1-cell_2513	6924.31	17865.1	Cardiomyocytes
sample_2d_r2_s1-cell_2514	3320.93	17882.5	Cardiac fibroblasts
sample_2d_r2_s1-cell_2515	2233.11	17898.6	Cardiac fibroblasts
sample_2d_r2_s1-cell_2516	2307.81	17908.2	Cardiac fibroblasts
sample_2d_r2_s1-cell_2518	7699.43	17864.9	Cardiomyocytes Nppa+
sample_2d_r2_s1-cell_2524	8193	17889.1	Cardiac fibroblasts
sample_2d_r2_s1-cell_2526	8126.71	17857	Cardiac fibroblasts
sample_2d_r2_s1-cell_2528	5958.37	17842.6	Endothelial cells
sample_2d_r2_s1-cell_2533	3734.27	17863	Cardiac fibroblasts
sample_2d_r2_s1-cell_2536	5837.17	17832	Myeloid cells
sample_2d_r2_s1-cell_2538	2251.86	17825.7	Endothelial cells
sample_2d_r2_s1-cell_2540	8078.09	17841.5	Myeloid cells
sample_2d_r2_s1-cell_2542	7818.54	17857.1	Lymphoid cells
sample_2d_r2_s1-cell_2548	7890.62	17831.9	Pericytes
sample_2d_r2_s1-cell_2563	3411.33	17703.9	Cardiac fibroblasts
sample_2d_r2_s1-cell_2565	3663.4	17801.1	Endothelial cells
sample_2d_r2_s1-cell_2568	7603.78	17796.9	Cardiomyocytes Nppa+
sample_2d_r2_s1-cell_2569	8007.83	17775.1	Cardiomyocytes Nppa+
sample_2d_r2_s1-cell_2578	7851.01	17737.9	Cardiomyocytes Nppa+
sample_2d_r2_s1-cell_2579	3239.36	17732.1	Cardiac fibroblasts
sample_2d_r2_s1-cell_2580	7645.03	17783.4	Cardiomyocytes Nppa+
sample_2d_r2_s1-cell_2581	8250.98	17766.4	Cardiomyocytes Nppa+
sample_2d_r2_s1-cell_2588	5885.85	17766.3	Myeloid cells
sample_2d_r2_s1-cell_2591	8151.93	17794.1	Cardiac fibroblasts
sample_2d_r2_s1-cell_2592	7084.57	17768.5	Lymphoid cells
sample_2d_r2_s1-cell_2594	7548.13	17792.6	Endothelial cells
sample_2d_r2_s1-cell_2596	7190.15	17768.7	Myeloid cells
sample_2d_r2_s1-cell_2601	7684.22	17780.9	Cardiomyocytes Nppa+
sample_2d_r2_s1-cell_2605	7144.9	17747.3	Cardiac fibroblasts
sample_2d_r2_s1-cell_2606	7264.14	17731.9	Cardiac fibroblasts
sample_2d_r2_s1-cell_2607	2264.36	17704.4	Cardiac fibroblasts
sample_2d_r2_s1-cell_2608	8073.35	17757	Cardiomyocytes Nppa+
sample_2d_r2_s1-cell_2609	2630.5	17772.1	Endothelial cells
sample_2d_r2_s1-cell_2615	2188.86	17727.4	Cardiac fibroblasts
sample_2d_r2_s1-cell_2618	6906.83	17747.5	Myeloid cells
sample_2d_r2_s1-cell_2619	2161.9	17747.2	Myeloid cells
sample_2d_r2_s1-cell_2621	7506.27	17752	Cardiac fibroblasts
sample_2d_r2_s1-cell_2622	5936.54	17745.6	Myeloid cells
sample_2d_r2_s1-cell_2623	6983.3	17754.8	Myeloid cells
sample_2d_r2_s1-cell_2636	7364.88	17707.9	Cardiomyocytes Nppa+
sample_2d_r2_s1-cell_2637	7680.67	17740.7	Cardiomyocytes Nppa+
sample_2d_r2_s1-cell_2638	7443.69	17692.2	Cardiomyocytes Nppa+
sample_2d_r2_s1-cell_2639	7599.69	17698.3	Cardiomyocytes Nppa+
sample_2d_r2_s1-cell_2640	7526.83	17691.5	Cardiomyocytes Nppa+
sample_2d_r2_s1-cell_2647	7047.76	17727	Myeloid cells
sample_2d_r2_s1-cell_2652	7087.35	17713.3	Myeloid cells
sample_2d_r2_s1-cell_2653	8146.16	17670.2	Cardiomyocytes Nppa+
sample_2d_r2_s1-cell_2654	8059.47	17679.1	Cardiomyocytes Nppa+
sample_2d_r2_s1-cell_2658	7656.06	17671.9	Cardiomyocytes Nppa+
sample_2d_r2_s1-cell_2660	7942.51	17643.3	Myeloid cells
sample_2d_r2_s1-cell_2666	7194.51	17625.3	Myeloid cells
sample_2d_r2_s1-cell_2674	7024.66	17679	Cardiomyocytes Nppa+
sample_2d_r2_s1-cell_2678	2927.79	17657.2	Myeloid cells
sample_2d_r2_s1-cell_2679	6346.37	17605.8	Myeloid cells
sample_2d_r2_s1-cell_2680	6772.28	17644.5	Cardiomyocytes Nppa+
sample_2d_r2_s1-cell_2681	2883.54	17668.3	Myeloid cells
sample_2d_r2_s1-cell_2686	7252.48	17659.6	Myeloid cells
sample_2d_r2_s1-cell_2687	3466.82	17644.5	Cardiac fibroblasts
sample_2d_r2_s1-cell_2688	7087.09	17600.2	Cardiomyocytes Nppa+
sample_2d_r2_s1-cell_2698	3837.56	17634.4	Cardiac fibroblasts
sample_2d_r2_s1-cell_2699	6968.51	17649.9	Endothelial cells
sample_2d_r2_s1-cell_2700	7734.27	17646.3	Cardiac fibroblasts
sample_2d_r2_s1-cell_2701	2863.06	17629	Pericytes
sample_2d_r2_s1-cell_2703	7313.49	17628.7	Myeloid cells
sample_2d_r2_s1-cell_2709	6868.67	17564.8	Cardiac fibroblasts
sample_2d_r2_s1-cell_2710	3180.94	17609.4	Myeloid cells
sample_2d_r2_s1-cell_2711	6984.88	17585.9	Cardiomyocytes Nppa+
sample_2d_r2_s1-cell_2716	7419.25	17625	Cardiac fibroblasts
sample_2d_r2_s1-cell_2717	5761.59	17568.3	Myeloid cells
sample_2d_r2_s1-cell_2718	2914.21	17555.5	Cardiac fibroblasts
sample_2d_r2_s1-cell_2722	6616.02	17563.9	Cardiomyocytes
sample_2d_r2_s1-cell_2724	7748.57	17614.2	Cardiac fibroblasts
sample_2d_r2_s1-cell_2726	7675.22	17603.9	Myeloid cells
sample_2d_r2_s1-cell_2735	7473.02	17597.7	Cardiac fibroblasts
sample_2d_r2_s1-cell_2736	8106.56	17596.6	Lymphoid cells
sample_2d_r2_s1-cell_2738	7363.15	17597.1	Myeloid cells
sample_2d_r2_s1-cell_2739	7824.47	17571.3	Myeloid cells
sample_2d_r2_s1-cell_2741	3423.91	17580.1	Pericytes
sample_2d_r2_s1-cell_2743	7407.35	17584.4	Cardiomyocytes Nppa+
sample_2d_r2_s1-cell_2744	7618.16	17558.2	Cardiomyocytes Nppa+
sample_2d_r2_s1-cell_2745	2960.12	17475.2	Endothelial cells
sample_2d_r2_s1-cell_2746	7315.14	17553.5	Cardiac fibroblasts
sample_2d_r2_s1-cell_2747	6388.07	17545.4	Myeloid cells
sample_2d_r2_s1-cell_2748	8057.98	17564.5	Endocardial cells
sample_2d_r2_s1-cell_2749	6792.99	17549	Cardiac fibroblasts
sample_2d_r2_s1-cell_2751	6478.82	17490.8	Cardiomyocytes Nppa+
sample_2d_r2_s1-cell_2752	7732.11	17554.6	Myeloid cells
sample_2d_r2_s1-cell_2753	7926.26	17572.7	Endothelial cells
sample_2d_r2_s1-cell_2754	2879.73	17549.7	Endothelial cells
sample_2d_r2_s1-cell_2757	3809.02	17547.7	Cardiac fibroblasts
sample_2d_r2_s1-cell_2758	2243.82	17476.5	Cardiomyocytes
sample_2d_r2_s1-cell_2760	6913.33	17496.1	Myeloid cells
sample_2d_r2_s1-cell_2762	2336.69	17442.5	Endothelial cells
sample_2d_r2_s1-cell_2768	7240.16	17522.3	Myeloid cells
sample_2d_r2_s1-cell_2769	7395.97	17444.4	Cardiomyocytes Nppa+
sample_2d_r2_s1-cell_2770	7677.06	17510.7	Myeloid cells
sample_2d_r2_s1-cell_2772	7525.3	17499.9	Cardiomyocytes Nppa+
sample_2d_r2_s1-cell_2774	7173.17	17486.8	Cardiac fibroblasts
sample_2d_r2_s1-cell_2776	7456.52	17494.4	Cardiomyocytes Nppa+
sample_2d_r2_s1-cell_2778	7038.01	17466	Cardiomyocytes
sample_2d_r2_s1-cell_2782	3260.9	17465.9	Cardiac fibroblasts
sample_2d_r2_s1-cell_2783	6321.97	17477.3	Cardiomyocytes Nppa+
sample_2d_r2_s1-cell_2784	6972.23	17494	Cardiomyocytes Nppa+
sample_2d_r2_s1-cell_2787	7334.1	17509.1	Cardiomyocytes Nppa+
sample_2d_r2_s1-cell_2788	3806.47	17343.4	Cardiac fibroblasts
sample_2d_r2_s1-cell_2794	5727.04	17480.4	Endothelial cells
sample_2d_r2_s1-cell_2796	7614.87	17472.3	Cardiomyocytes Nppa+
sample_2d_r2_s1-cell_2797	7738.75	17468.8	Endocardial cells
sample_2d_r2_s1-cell_2799	6767.11	17431	Cardiomyocytes Nppa+
sample_2d_r2_s1-cell_2806	7312.87	17433.4	Cardiomyocytes Nppa+
sample_2d_r2_s1-cell_2808	7259.55	17455	Cardiomyocytes Nppa+
sample_2d_r2_s1-cell_2813	6361.3	17395	Cardiomyocytes Nppa+
sample_2d_r2_s1-cell_2815	6591.23	17429.3	Cardiomyocytes
sample_2d_r2_s1-cell_2817	7546.54	17435	Cardiomyocytes Nppa+
sample_2d_r2_s1-cell_2820	6083.3	17433.9	Myeloid cells
sample_2d_r2_s1-cell_2821	2874.47	17344.9	Endothelial cells
sample_2d_r2_s1-cell_2829	7145.51	17412.3	Cardiac fibroblasts
sample_2d_r2_s1-cell_2830	6914.29	17366.7	Cardiomyocytes Nppa+
sample_2d_r2_s1-cell_2838	6185.49	17296.6	Cardiomyocytes
sample_2d_r2_s1-cell_2839	7201.61	17392.6	Cardiomyocytes Nppa+
sample_2d_r2_s1-cell_2840	7558.51	17390.1	Endocardial cells
sample_2d_r2_s1-cell_2841	5997.66	17364.4	Myeloid cells
sample_2d_r2_s1-cell_2842	5724.37	17320.2	Myeloid cells
sample_2d_r2_s1-cell_2848	7021.85	17363.5	Myeloid cells
sample_2d_r2_s1-cell_2849	3249.88	17326.8	Endothelial cells
sample_2d_r2_s1-cell_2850	6454.14	17361.8	Cardiac fibroblasts
sample_2d_r2_s1-cell_2851	7265.04	17353	Cardiomyocytes Nppa+
sample_2d_r2_s1-cell_2854	2215.98	17347.2	Endothelial cells
sample_2d_r2_s1-cell_2856	6026.29	17272.4	Myeloid cells
sample_2d_r2_s1-cell_2859	6816.87	17360.2	Pericytes
sample_2d_r2_s1-cell_2861	7094.01	17355.4	Myeloid cells
sample_2d_r2_s1-cell_2862	7444.57	17367.7	Endocardial cells
sample_2d_r2_s1-cell_2867	7322.69	17335.2	Cardiomyocytes Nppa+
sample_2d_r2_s1-cell_2870	6396.69	17329.4	Cardiac fibroblasts
sample_2d_r2_s1-cell_2872	5858.27	17278.8	Myeloid cells
sample_2d_r2_s1-cell_2873	3323.79	17331.2	Endothelial cells
sample_2d_r2_s1-cell_2876	7002.25	17303.4	Myeloid cells
sample_2d_r2_s1-cell_2877	6757.32	17277.4	Cardiomyocytes
sample_2d_r2_s1-cell_2879	5821.34	17316.5	Myeloid cells
sample_2d_r2_s1-cell_2880	2308.63	17251.6	Endothelial cells
sample_2d_r2_s1-cell_2881	7056.65	17320.7	Lymphoid cells
sample_2d_r2_s1-cell_2882	6468.3	17250	Cardiomyocytes Nppa+
sample_2d_r2_s1-cell_2883	7123.73	17282.5	Cardiomyocytes Nppa+
sample_2d_r2_s1-cell_2884	6339.09	17306.5	Cardiac fibroblasts
sample_2d_r2_s1-cell_2886	2207.78	17156.2	Cardiac fibroblasts
sample_2d_r2_s1-cell_2889	7199.7	17305.8	Cardiac fibroblasts
sample_2d_r2_s1-cell_2891	7214.4	17254.7	Myeloid cells
sample_2d_r2_s1-cell_2892	7065.1	17277.3	Myeloid cells
sample_2d_r2_s1-cell_2897	6929.25	17263.7	Myeloid cells
sample_2d_r2_s1-cell_2899	6657.7	17219.6	Cardiomyocytes
sample_2d_r2_s1-cell_2903	6870.61	17262.4	Cardiac fibroblasts
sample_2d_r2_s1-cell_2904	7039.15	17203.2	Cardiomyocytes Nppa+
sample_2d_r2_s1-cell_2906	6060.49	17220.7	Myeloid cells
sample_2d_r2_s1-cell_2908	6357.08	17158.5	Cardiomyocytes Nppa+
sample_2d_r2_s1-cell_2909	6864.41	17192.8	Myeloid cells
sample_2d_r2_s1-cell_2910	6312.25	17236.3	Cardiomyocytes Nppa+
sample_2d_r2_s1-cell_2913	5826.02	17131.9	Cardiomyocytes
sample_2d_r2_s1-cell_2916	6218.77	17187.4	Cardiomyocytes Nppa+
sample_2d_r2_s1-cell_2917	6286.97	17189.4	Cardiomyocytes Nppa+
sample_2d_r2_s1-cell_2920	5679.55	17190.8	Myeloid cells
sample_2d_r2_s1-cell_2922	6739.67	17187.9	Lymphoid cells
sample_2d_r2_s1-cell_2923	6699.97	17165.8	Myeloid cells
sample_2d_r2_s1-cell_2925	6084.47	17167.1	Myeloid cells
sample_2d_r2_s1-cell_2926	6255.71	17105	Cardiomyocytes Nppa+
sample_2d_r2_s1-cell_2928	6091.39	17104.7	Cardiomyocytes Nppa+
sample_2d_r2_s1-cell_2929	5653.11	17035.9	Endothelial cells
sample_2d_r2_s1-cell_2930	6179.92	17096.6	Cardiomyocytes Nppa+
sample_2d_r2_s1-cell_2934	6130.85	17085.5	Cardiomyocytes Nppa+
sample_2d_r2_s1-cell_2935	1859.49	17103.5	Myeloid cells
sample_2d_r2_s1-cell_2944	1981.32	17051.9	Cardiac fibroblasts
sample_2d_r2_s1-cell_2945	2043.2	17030.1	Cardiac fibroblasts
sample_2d_r2_s1-cell_2954	3040.3	17094.9	Pericytes
sample_2d_r2_s1-cell_2957	6036.11	17084.2	Cardiomyocytes Nppa+
sample_2d_r2_s1-cell_2959	5955.82	17083.1	Myeloid cells
sample_2d_r2_s1-cell_2961	5435.31	16954.5	Myeloid cells
sample_2d_r2_s1-cell_2962	6413.06	17087.3	Lymphoid cells
sample_2d_r2_s1-cell_2973	5980.65	17054.7	Cardiomyocytes Nppa+
sample_2d_r2_s1-cell_2974	6391.66	17042.3	Myeloid cells
sample_2d_r2_s1-cell_2975	5856.28	17018.8	Cardiomyocytes Nppa+
sample_2d_r2_s1-cell_2976	6285.2	17036.3	Endothelial cells
sample_2d_r2_s1-cell_2977	6061.38	16986.4	Cardiomyocytes Nppa+
sample_2d_r2_s1-cell_2978	6337.46	17038.1	Endothelial cells
sample_2d_r2_s1-cell_2980	5382.37	17013.9	Myeloid cells
sample_2d_r2_s1-cell_2984	5950.04	16971.2	Cardiomyocytes Nppa+
sample_2d_r2_s1-cell_2986	6223.88	17029.4	Myeloid cells
sample_2d_r2_s1-cell_2990	6197.74	16997.3	Myeloid cells
sample_2d_r2_s1-cell_2991	6122.32	16966.8	Endothelial cells
sample_2d_r2_s1-cell_2992	2928.91	16982.8	Endothelial cells
sample_2d_r2_s1-cell_2993	5307.97	16964.3	Myeloid cells
sample_2d_r2_s1-cell_2996	5714.27	16978.6	Myeloid cells
sample_2d_r2_s1-cell_2997	2815.48	16920.9	Endothelial cells
sample_2d_r2_s1-cell_3008	1862.55	16926.2	Endothelial cells
sample_2d_r2_s1-cell_3011	5813.19	16882.6	Cardiomyocytes Nppa+
sample_2d_r2_s1-cell_3012	1928.84	16885	Cardiomyocytes
sample_2d_r2_s1-cell_3013	2102.28	16871.8	Cardiac fibroblasts
sample_2d_r2_s1-cell_3017	5736.9	16928.8	Cardiomyocytes Nppa+
sample_2d_r2_s1-cell_3020	5346.5	16889.8	Myeloid cells
sample_2d_r2_s1-cell_3024	3141.74	16880	Cardiomyocytes
sample_2d_r2_s1-cell_3027	5181.6	16900.1	Myeloid cells
sample_2d_r2_s1-cell_3029	5665.25	16903.9	Endothelial cells
sample_2d_r2_s1-cell_3031	6033.64	16888.4	Myeloid cells
sample_2d_r2_s1-cell_3032	5605.91	16812.5	Cardiomyocytes
sample_2d_r2_s1-cell_3035	5968.46	16857.2	Endothelial cells
sample_2d_r2_s1-cell_3039	2848.37	16850.5	Cardiac fibroblasts
sample_2d_r2_s1-cell_3051	5276.09	16799.7	Myeloid cells
sample_2d_r2_s1-cell_3054	2800.87	16796.3	Cardiac fibroblasts
sample_2d_r2_s1-cell_3074	5241.8	16624.2	Myeloid cells
sample_2d_r2_s1-cell_3077	6394.05	16730	Endothelial cells
sample_2d_r2_s1-cell_3079	5962.69	16745.5	Endothelial cells
sample_2d_r2_s1-cell_3087	5745	16717.6	Cardiomyocytes
sample_2d_r2_s1-cell_3088	1904.39	16712.4	Myeloid cells
sample_2d_r2_s1-cell_3089	5647.53	16747.7	Myeloid cells
sample_2d_r2_s1-cell_3091	5601.37	16710.4	Myeloid cells
sample_2d_r2_s1-cell_3092	2088	16695.1	Cardiac fibroblasts
sample_2d_r2_s1-cell_3095	2762.97	16703.8	Cardiac fibroblasts
sample_2d_r2_s1-cell_3103	1982.38	16660.8	Cardiac fibroblasts
sample_2d_r2_s1-cell_3108	1865.32	16668	Cardiac fibroblasts
sample_2d_r2_s1-cell_3109	6341.12	16719.5	Endothelial cells
sample_2d_r2_s1-cell_3117	6264.69	16687.2	Myeloid cells
sample_2d_r2_s1-cell_3118	6297.78	16654.5	Cardiomyocytes Nppa+
sample_2d_r2_s1-cell_3121	5816.68	16643.1	Endothelial cells
sample_2d_r2_s1-cell_3127	5736.34	16627.7	Myeloid cells
sample_2d_r2_s1-cell_3134	5612.07	16647.7	Myeloid cells
sample_2d_r2_s1-cell_3136	1889.92	16616.5	Cardiac fibroblasts
sample_2d_r2_s1-cell_3146	6186.06	16621.6	Cardiomyocytes
sample_2d_r2_s1-cell_3151	6199.33	16588.5	Cardiomyocytes Nppa+
sample_2d_r2_s1-cell_3152	5581.86	16555.7	Cardiomyocytes Nppa+
sample_2d_r2_s1-cell_3153	2668.99	16592.4	Endothelial cells
sample_2d_r2_s1-cell_3156	5131.16	16578.9	Myeloid cells
sample_2d_r2_s1-cell_3158	6134.15	16584.2	Cardiac fibroblasts
sample_2d_r2_s1-cell_3159	5945.83	16532.6	Cardiomyocytes Nppa+
sample_2d_r2_s1-cell_3160	1867.6	16480.4	Cardiomyocytes
sample_2d_r2_s1-cell_3161	5854.92	16586.3	Cardiac fibroblasts
sample_2d_r2_s1-cell_3163	6042.72	16582.9	Endothelial cells
sample_2d_r2_s1-cell_3169	6093.04	16566.8	Myeloid cells
sample_2d_r2_s1-cell_3174	5678.64	16517.1	Cardiomyocytes Nppa+
sample_2d_r2_s1-cell_3175	5654.26	16555.3	Cardiomyocytes Nppa+
sample_2d_r2_s1-cell_3180	6294.26	16564.4	Endothelial cells
sample_2d_r2_s1-cell_3182	6026.46	16543.7	Cardiac fibroblasts
sample_2d_r2_s1-cell_3185	5892.93	16499.6	Cardiomyocytes
sample_2d_r2_s1-cell_3186	5845.97	16475.3	Cardiomyocytes Nppa+
sample_2d_r2_s1-cell_3187	6077.15	16523.5	Myeloid cells
sample_2d_r2_s1-cell_3190	2647.11	16528.9	Cardiac fibroblasts
sample_2d_r2_s1-cell_3192	6140.07	16530.4	Cardiac fibroblasts
sample_2d_r2_s1-cell_3199	6181.86	16521	Cardiomyocytes Nppa+
sample_2d_r2_s1-cell_3202	6019.05	16483.2	Cardiac fibroblasts
sample_2d_r2_s1-cell_3203	6182.22	16454.6	Cardiomyocytes Nppa+
sample_2d_r2_s1-cell_3210	6119.13	16442.9	Cardiomyocytes Nppa+
sample_2d_r2_s1-cell_3211	1779.26	16435.4	Cardiac fibroblasts
sample_2d_r2_s1-cell_3214	6092.02	16473.6	Cardiomyocytes Nppa+
sample_2d_r2_s1-cell_3218	5520.03	16455.1	Cardiac fibroblasts
sample_2d_r2_s1-cell_3219	6055.83	16462.7	Cardiomyocytes Nppa+
sample_2d_r2_s1-cell_3220	5782.71	16417.1	Cardiac fibroblasts
sample_2d_r2_s1-cell_3221	5587.53	16427.3	Pericytes
sample_2d_r2_s1-cell_3223	5062.45	16377.1	Myeloid cells
sample_2d_r2_s1-cell_3225	1669.5	16383	Cardiac fibroblasts
sample_2d_r2_s1-cell_3232	2144.77	16250.8	Myeloid cells
sample_2d_r2_s1-cell_3233	2013.19	16404.5	Cardiac fibroblasts
sample_2d_r2_s1-cell_3237	5462.91	16361.4	Cardiomyocytes Nppa+
sample_2d_r2_s1-cell_3239	6196.78	16401.8	Endocardial cells
sample_2d_r2_s1-cell_3240	5936.72	16422.8	Endothelial cells
sample_2d_r2_s1-cell_3241	6018.67	16407.5	Cardiomyocytes Nppa+
sample_2d_r2_s1-cell_3252	5937.25	16373.2	Cardiomyocytes Nppa+
sample_2d_r2_s1-cell_3256	6126.54	16353	Cardiomyocytes Nppa+
sample_2d_r2_s1-cell_3258	5852.89	16366.9	Cardiomyocytes Nppa+
sample_2d_r2_s1-cell_3260	5974.62	16311.6	Cardiomyocytes Nppa+
sample_2d_r2_s1-cell_3262	6069.26	16340.4	Cardiomyocytes Nppa+
sample_2d_r2_s1-cell_3265	5756.74	16325.6	Cardiomyocytes Nppa+
sample_2d_r2_s1-cell_3276	5554.71	16248	Cardiomyocytes Nppa+
sample_2d_r2_s1-cell_3277	1766.17	16336.7	Endothelial cells
sample_2d_r2_s1-cell_3281	5621.1	16342.5	Pericytes
sample_2d_r2_s1-cell_3286	5658.56	16275.3	Cardiomyocytes Nppa+
sample_2d_r2_s1-cell_3290	5797.03	16324.1	Myeloid cells
sample_2d_r2_s1-cell_3293	5833.16	16311.1	Myeloid cells
sample_2d_r2_s1-cell_3294	5914.25	16324.7	Endothelial cells
sample_2d_r2_s1-cell_3299	5877.47	16303.4	Cardiomyocytes Nppa+
sample_2d_r2_s1-cell_3305	1859.64	16214.2	Myeloid cells
sample_2d_r2_s1-cell_3306	6076.17	16269.9	Cardiomyocytes Nppa+
sample_2d_r2_s1-cell_3307	1775.59	16280.7	Pericytes
sample_2d_r2_s1-cell_3309	5964.09	16213	Cardiomyocytes Nppa+
sample_2d_r2_s1-cell_3311	5466.28	16270.7	Myeloid cells
sample_2d_r2_s1-cell_3316	4924.92	16261.1	Myeloid cells
sample_2d_r2_s1-cell_3317	5800.97	16268.7	Cardiac fibroblasts
sample_2d_r2_s1-cell_3320	5343.21	16234.1	Cardiomyocytes
sample_2d_r2_s1-cell_3326	1734.63	16184.5	Cardiomyocytes
sample_2d_r2_s1-cell_3327	5415.02	16247.5	Cardiomyocytes
sample_2d_r2_s1-cell_3329	1986.67	16125.9	Myeloid cells
sample_2d_r2_s1-cell_3332	1802.27	16243.2	Pericytes
sample_2d_r2_s1-cell_3334	5750.24	16172.4	Cardiac fibroblasts
sample_2d_r2_s1-cell_3344	1790.34	16167.3	Cardiomyocytes
sample_2d_r2_s1-cell_3345	5454.23	16208.3	Cardiomyocytes Nppa+
sample_2d_r2_s1-cell_3348	1548.48	16173.3	Endothelial cells
sample_2d_r2_s1-cell_3349	5850.79	16145.6	Cardiomyocytes Nppa+
sample_2d_r2_s1-cell_3354	5406.75	16190	Myeloid cells
sample_2d_r2_s1-cell_3357	1471.55	16151.9	Cardiac fibroblasts
sample_2d_r2_s1-cell_3366	5338.4	16107.5	Cardiomyocytes Nppa+
sample_2d_r2_s1-cell_3368	5503.4	16144.3	Cardiomyocytes Nppa+
sample_2d_r2_s1-cell_3372	5776.62	16082.1	Cardiomyocytes Nppa+
sample_2d_r2_s1-cell_3379	5509.17	16063.1	Cardiomyocytes Nppa+
sample_2d_r2_s1-cell_3381	5642.4	16046.9	Myeloid cells
sample_2d_r2_s1-cell_3386	1774.6	16100.2	Cardiac fibroblasts
sample_2d_r2_s1-cell_3391	1763.01	16060	Myeloid cells
sample_2d_r2_s1-cell_3397	1434.59	16043.1	Cardiac fibroblasts
sample_2d_r2_s1-cell_3404	1914.09	16019.3	Myeloid cells
sample_2d_r2_s1-cell_3405	1452.08	15969.2	Cardiac fibroblasts
sample_2d_r2_s1-cell_3409	5429.04	16036.4	Cardiomyocytes
sample_2d_r2_s1-cell_3411	5380.27	16035.3	Cardiac fibroblasts
sample_2d_r2_s1-cell_3412	5716.1	16029.1	Myeloid cells
sample_2d_r2_s1-cell_3413	1662.02	16015.5	Endothelial cells
sample_2d_r2_s1-cell_3416	5262.84	15946.8	Cardiomyocytes Nppa+
sample_2d_r2_s1-cell_3419	5574.93	16000.7	Cardiomyocytes Nppa+
sample_2d_r2_s1-cell_3420	1824.78	15999.2	Endothelial cells
sample_2d_r2_s1-cell_3421	5044.16	15986.3	Cardiac fibroblasts
sample_2d_r2_s1-cell_3425	5732.02	15982.8	Myeloid cells
sample_2d_r2_s1-cell_3427	5337.46	16001	Cardiac fibroblasts
sample_2d_r2_s1-cell_3430	5411.29	15975.4	Cardiomyocytes
sample_2d_r2_s1-cell_3444	5196.15	15951.8	Cardiomyocytes Nppa+
sample_2d_r2_s1-cell_3445	5690.88	15951.7	Myeloid cells
sample_2d_r2_s1-cell_3447	1615.42	15869.1	Endothelial cells
sample_2d_r2_s1-cell_3448	5602.07	15957.9	Cardiomyocytes Nppa+
sample_2d_r2_s1-cell_3452	5365.02	15868.2	Cardiomyocytes Nppa+
sample_2d_r2_s1-cell_3453	1920.64	15941.7	Myeloid cells
sample_2d_r2_s1-cell_3454	1770.5	15934.2	Endothelial cells
sample_2d_r2_s1-cell_3455	5040.58	15896.8	Cardiomyocytes
sample_2d_r2_s1-cell_3458	5088.97	15920.6	Cardiomyocytes
sample_2d_r2_s1-cell_3459	5526.28	15920.3	Cardiomyocytes Nppa+
sample_2d_r2_s1-cell_3462	5627.86	15903.9	Cardiomyocytes Nppa+
sample_2d_r2_s1-cell_3465	2197.2	15890.3	Cardiac fibroblasts
sample_2d_r2_s1-cell_3475	5680.1	15888.8	Endocardial cells
sample_2d_r2_s1-cell_3476	5572.17	15861.1	Cardiomyocytes Nppa+
sample_2d_r2_s1-cell_3480	5452.84	15861	Cardiomyocytes Nppa+
sample_2d_r2_s1-cell_3482	2240.45	15833.4	Myeloid cells
sample_2d_r2_s1-cell_3483	5216.66	15861.9	Cardiac fibroblasts
sample_2d_r2_s1-cell_3488	1712.99	15747.9	Endothelial cells
sample_2d_r2_s1-cell_3496	1955.34	15847.3	Endothelial cells
sample_2d_r2_s1-cell_3501	5504.66	15820	Cardiomyocytes Nppa+
sample_2d_r2_s1-cell_3502	5010.39	15763.8	Cardiomyocytes
sample_2d_r2_s1-cell_3506	2020.35	15813.5	Myeloid cells
sample_2d_r2_s1-cell_3508	2021.2	15688.6	Myeloid cells
sample_2d_r2_s1-cell_3509	5135.56	15749	Cardiomyocytes Nppa+
sample_2d_r2_s1-cell_3511	2170.03	15801.2	Endothelial cells
sample_2d_r2_s1-cell_3516	1857.7	15801.6	Pericytes
sample_2d_r2_s1-cell_3517	1504.11	15678.9	Cardiomyocytes
sample_2d_r2_s1-cell_3518	1884.1	15741.5	Myeloid cells
sample_2d_r2_s1-cell_3521	4888.34	15713.7	Cardiomyocytes
sample_2d_r2_s1-cell_3524	5270.95	15790.9	Myeloid cells
sample_2d_r2_s1-cell_3530	5222.35	15773.3	Cardiomyocytes Nppa+
sample_2d_r2_s1-cell_3537	2190.75	15741.9	Myeloid cells
sample_2d_r2_s1-cell_3538	4371.92	15582.5	Cardiac fibroblasts
sample_2d_r2_s1-cell_3543	4948.6	15639.5	Cardiomyocytes Nppa+
sample_2d_r2_s1-cell_3546	1268.37	15625.4	Cardiomyocytes
sample_2d_r2_s1-cell_3548	1364.2	15714.9	Lymphoid cells
sample_2d_r2_s1-cell_3558	1395.1	15619	Lymphoid cells
sample_2d_r2_s1-cell_3559	5119.5	15579.2	Cardiomyocytes Nppa+
sample_2d_r2_s1-cell_3576	4241.31	15474.8	Myeloid cells
sample_2d_r2_s1-cell_3589	4857.79	15580.4	Endothelial cells
sample_2d_r2_s1-cell_3592	1175.47	15498.1	Cardiac fibroblasts
sample_2d_r2_s1-cell_3594	5009.1	15520.3	Cardiomyocytes Nppa+
sample_2d_r2_s1-cell_3596	1173.74	15570.8	Cardiac fibroblasts
sample_2d_r2_s1-cell_3602	5239.69	15519.2	Cardiomyocytes Nppa+
sample_2d_r2_s1-cell_3603	4776.14	15484.7	Cardiomyocytes
sample_2d_r2_s1-cell_3604	1474.43	15537.9	Myeloid cells
sample_2d_r2_s1-cell_3608	1393.92	15528.1	Cardiac fibroblasts
sample_2d_r2_s1-cell_3609	4657.29	15417.1	Cardiac fibroblasts
sample_2d_r2_s1-cell_3611	1303.57	15347.3	Cardiomyocytes
sample_2d_r2_s1-cell_3615	1272.81	15519.2	Endothelial cells
sample_2d_r2_s1-cell_3623	4912.59	15411.8	Cardiomyocytes Nppa+
sample_2d_r2_s1-cell_3624	1446.76	15413.4	Myeloid cells
sample_2d_r2_s1-cell_3627	5089.75	15451.6	Cardiac fibroblasts
sample_2d_r2_s1-cell_3628	1212.74	15421	Cardiomyocytes
sample_2d_r2_s1-cell_3630	1499.35	15478.9	Myeloid cells
sample_2d_r2_s1-cell_3633	1390.93	15448.5	Myeloid cells
sample_2d_r2_s1-cell_3637	5149.42	15339.7	Cardiomyocytes Nppa+
sample_2d_r2_s1-cell_3642	4131.25	15392.5	Myeloid cells
sample_2d_r2_s1-cell_3643	4526.81	15344.2	Endothelial cells
sample_2d_r2_s1-cell_3644	5033.85	15412.6	Myeloid cells
sample_2d_r2_s1-cell_3649	1134.29	15374	Cardiac fibroblasts
sample_2d_r2_s1-cell_3650	4065.51	15336.9	Cardiac fibroblasts
sample_2d_r2_s1-cell_3651	4782.83	15318.2	Cardiomyocytes Nppa+
sample_2d_r2_s1-cell_3655	5022.33	15343.9	Endothelial cells
sample_2d_r2_s1-cell_3656	4215.72	15268	Myeloid cells
sample_2d_r2_s1-cell_3661	5233.1	15329.1	Endocardial cells
sample_2d_r2_s1-cell_3664	4692.83	15315.7	Myeloid cells
sample_2d_r2_s1-cell_3665	3904.7	15331.8	Myeloid cells
sample_2d_r2_s1-cell_3667	4959.55	15250.7	Cardiomyocytes Nppa+
sample_2d_r2_s1-cell_3672	1108.86	15311.1	Cardiac fibroblasts
sample_2d_r2_s1-cell_3674	2512.3	15271.6	Endothelial cells
sample_2d_r2_s1-cell_3677	1134.36	15187.4	Cardiomyocytes Nppa+
sample_2d_r2_s1-cell_3679	3789.04	15257.8	Myeloid cells
sample_2d_r2_s1-cell_3681	5066.49	15244.2	Cardiomyocytes Nppa+
sample_2d_r2_s1-cell_3685	4640.02	15159	Cardiomyocytes Nppa+
sample_2d_r2_s1-cell_3686	4124.78	15290.1	Myeloid cells
sample_2d_r2_s1-cell_3688	4889.63	15291.2	Cardiac fibroblasts
sample_2d_r2_s1-cell_3689	4150.58	15242.4	Myeloid cells
sample_2d_r2_s1-cell_3692	1387.42	15254.1	Pericytes
sample_2d_r2_s1-cell_3695	3902.7	15104.8	Myeloid cells
sample_2d_r2_s1-cell_3698	1447.12	15220.9	Pericytes
sample_2d_r2_s1-cell_3699	4001.22	15121.1	Cardiac fibroblasts
sample_2d_r2_s1-cell_3700	4093.75	15264.2	Pericytes
sample_2d_r2_s1-cell_3703	4422.91	15258.9	Cardiac fibroblasts
sample_2d_r2_s1-cell_3704	4862.34	15239	Cardiac fibroblasts
sample_2d_r2_s1-cell_3715	1513.9	15207.4	Endothelial cells
sample_2d_r2_s1-cell_3717	4094.29	15196.2	Endothelial cells
sample_2d_r2_s1-cell_3720	4429.23	15207.9	Cardiac fibroblasts
sample_2d_r2_s1-cell_3726	1401.04	15191.6	Endothelial cells
sample_2d_r2_s1-cell_3728	4772.73	15143.5	Cardiomyocytes Nppa+
sample_2d_r2_s1-cell_3729	5026.61	15146.4	Cardiomyocytes Nppa+
sample_2d_r2_s1-cell_3730	1547.98	15137.7	Endothelial cells
sample_2d_r2_s1-cell_3732	4838.53	15103.7	Cardiomyocytes Nppa+
sample_2d_r2_s1-cell_3733	4477.85	15084	Cardiomyocytes
sample_2d_r2_s1-cell_3735	4362.92	15110.6	Myeloid cells
sample_2d_r2_s1-cell_3739	4079.69	15034.4	Myeloid cells
sample_2d_r2_s1-cell_3740	4928.16	15104.3	Cardiomyocytes Nppa+
sample_2d_r2_s1-cell_3743	1420.72	15093.9	Endothelial cells
sample_2d_r2_s1-cell_3745	1485.15	15132.5	Endothelial cells
sample_2d_r2_s1-cell_3750	1626.77	15042.1	Endothelial cells
sample_2d_r2_s1-cell_3753	1070.58	15051.5	Cardiac fibroblasts
sample_2d_r2_s1-cell_3757	1150.69	15058	Endothelial cells
sample_2d_r2_s1-cell_3758	1743.98	15055.9	Cardiac fibroblasts
sample_2d_r2_s1-cell_3764	4754.97	15032.1	Cardiomyocytes Nppa+
sample_2d_r2_s1-cell_3765	1099.98	14994.8	Endothelial cells
sample_2d_r2_s1-cell_3783	1478.36	14925.7	Endothelial cells
sample_2d_r2_s1-cell_3785	4219.75	14890.3	Myeloid cells
sample_2d_r2_s1-cell_3786	1115.57	14945.9	Endothelial cells
sample_2d_r2_s1-cell_3787	1011.52	14943.8	Cardiac fibroblasts
sample_2d_r2_s1-cell_3796	3896.54	14808.7	Cardiac fibroblasts
sample_2d_r2_s1-cell_3797	4118.41	14914.6	Cardiac fibroblasts
sample_2d_r2_s1-cell_3814	1043.02	14815.8	Endothelial cells
sample_2d_r2_s1-cell_3816	997.896	14847.5	Cardiac fibroblasts
sample_2d_r2_s1-cell_3818	3796.15	14802	Myeloid cells
sample_2d_r2_s1-cell_3829	1110.9	14773	Endothelial cells
sample_2d_r2_s1-cell_3834	1425.87	14854.6	Pericytes
sample_2d_r2_s1-cell_3848	1459.77	14746	Cardiac fibroblasts
sample_2d_r2_s1-cell_3857	983.72	14735.4	Cardiac fibroblasts
sample_2d_r2_s1-cell_3868	1038.92	14679.1	Cardiac fibroblasts
sample_2d_r2_s1-cell_3869	1588.76	14616.3	Cardiac fibroblasts
sample_2d_r2_s1-cell_3879	1694.76	14667.1	Cardiac fibroblasts
sample_2d_r2_s1-cell_3884	1462.21	14610.2	Endothelial cells
sample_2d_r2_s1-cell_3892	4108.65	14635.5	Cardiac fibroblasts
sample_2d_r2_s1-cell_3895	4223.97	14558.6	Endothelial cells
sample_2d_r2_s1-cell_3908	4062.35	14579.9	Myeloid cells
sample_2d_r2_s1-cell_3911	1645.64	14612.3	Myeloid cells
sample_2d_r2_s1-cell_3925	934.747	14530.9	Cardiac fibroblasts
sample_2d_r2_s1-cell_3929	4149.94	14528.4	Myeloid cells
sample_2d_r2_s1-cell_3936	4024.59	14373.2	Cardiac fibroblasts
sample_2d_r2_s1-cell_3939	1380.49	14396.9	Cardiac fibroblasts
sample_2d_r2_s1-cell_3951	1365.77	14473.1	Endothelial cells
sample_2d_r2_s1-cell_3954	1510.37	14473.6	Endothelial cells
sample_2d_r2_s1-cell_3962	4205.29	14463.4	Myeloid cells
sample_2d_r2_s1-cell_3964	917.522	14415.5	Cardiac fibroblasts
sample_2d_r2_s1-cell_3965	944.13	14374.9	Endothelial cells
sample_2d_r2_s1-cell_3967	4254.07	14432.1	Cardiac fibroblasts
sample_2d_r2_s1-cell_3968	3869.65	14351.2	Cardiac fibroblasts
sample_2d_r2_s1-cell_3975	1434.3	14318.3	Cardiac fibroblasts
sample_2d_r2_s1-cell_4002	1576.1	14215.6	Myeloid cells
sample_2d_r2_s1-cell_4005	4190	14210.4	Cardiomyocytes Nppa+
sample_2d_r2_s1-cell_4009	965.966	14227.8	Cardiac fibroblasts
sample_2d_r2_s1-cell_4011	1320.77	14153.7	Cardiac fibroblasts
sample_2d_r2_s1-cell_4016	3703.03	14232.9	Myeloid cells
sample_2d_r2_s1-cell_4024	869.38	14231.4	Cardiac fibroblasts
sample_2d_r2_s1-cell_4026	4063.81	14192.1	Cardiomyocytes
sample_2d_r2_s1-cell_4031	847.271	14184.8	Cardiac fibroblasts
sample_2d_r2_s1-cell_4053	4089.5	14104.1	Cardiomyocytes Nppa+
sample_2d_r2_s1-cell_4058	4022.63	14045.8	Cardiomyocytes Nppa+
sample_2d_r2_s1-cell_4066	4145.29	14057.1	Cardiac fibroblasts
sample_2d_r2_s1-cell_4071	1799.47	13918.3	Cardiac fibroblasts
sample_2d_r2_s1-cell_4073	4196.58	13992.1	Cardiomyocytes Nppa+
sample_2d_r2_s1-cell_4076	588.04	13978.2	Endothelial cells
sample_2d_r2_s1-cell_4085	1574.25	13872.3	Cardiac fibroblasts
sample_2d_r2_s1-cell_4088	3938.7	14005.4	Myeloid cells
sample_2d_r2_s1-cell_4089	3342.93	13979.9	Myeloid cells
sample_2d_r2_s1-cell_4091	1085.78	13948.7	Cardiac fibroblasts
sample_2d_r2_s1-cell_4098	1367.51	13873.7	Cardiac fibroblasts
sample_2d_r2_s1-cell_4099	959.933	13953.7	Cardiac fibroblasts
sample_2d_r2_s1-cell_4100	3972.45	13890.8	Cardiomyocytes
sample_2d_r2_s1-cell_4101	4054.81	13960.2	Myeloid cells
sample_2d_r2_s1-cell_4104	3740.83	13817.3	Myeloid cells
sample_2d_r2_s1-cell_4105	4129.11	13871.9	Cardiomyocytes Nppa+
sample_2d_r2_s1-cell_4109	1062.31	13837.2	Cardiac fibroblasts
sample_2d_r2_s1-cell_4110	3270.55	13924.1	Myeloid cells
sample_2d_r2_s1-cell_4111	4046.04	13925.6	Endothelial cells
sample_2d_r2_s1-cell_4117	4238.03	13829.2	Cardiomyocytes Nppa+
sample_2d_r2_s1-cell_4120	3277.85	13847.5	Myeloid cells
sample_2d_r2_s1-cell_4124	1002.38	13881	Cardiac fibroblasts
sample_2d_r2_s1-cell_4125	550.341	13806.2	Cardiac fibroblasts
sample_2d_r2_s1-cell_4129	1157.68	13820.6	Endothelial cells
sample_2d_r2_s1-cell_4132	1763.27	13649.9	Cardiac fibroblasts
sample_2d_r2_s1-cell_4133	1023.68	13746.9	Myeloid cells
sample_2d_r2_s1-cell_4136	4027.39	13750	Cardiomyocytes
sample_2d_r2_s1-cell_4138	2145.05	13791.7	Cardiac fibroblasts
sample_2d_r2_s1-cell_4139	483.021	13709.1	Cardiac fibroblasts
sample_2d_r2_s1-cell_4140	1167.08	13678.4	Endothelial cells
sample_2d_r2_s1-cell_4145	1108.49	13710.5	Cardiac fibroblasts
sample_2d_r2_s1-cell_4147	3238.58	13724	Myeloid cells
sample_2d_r2_s1-cell_4149	4139.13	13764.7	Endothelial cells
sample_2d_r2_s1-cell_4161	4183.17	13706.7	Endothelial cells
sample_2d_r2_s1-cell_4169	1326.76	13676.7	Cardiac fibroblasts
sample_2d_r2_s1-cell_4171	3938.48	13709.8	Myeloid cells
sample_2d_r2_s1-cell_4172	4113.21	13694.7	Cardiomyocytes
sample_2d_r2_s1-cell_4173	3602.28	13554.1	Myeloid cells
sample_2d_r2_s1-cell_4174	1403.2	13571.4	Myeloid cells
sample_2d_r2_s1-cell_4175	1662.07	13555.6	Cardiac fibroblasts
sample_2d_r2_s1-cell_4179	4253.67	13688.9	Endothelial cells
sample_2d_r2_s1-cell_4186	3137.35	13641	Pericytes
sample_2d_r2_s1-cell_4190	3958.69	13558	Cardiomyocytes
sample_2d_r2_s1-cell_4192	4137.75	13533.1	Cardiomyocytes Nppa+
sample_2d_r2_s1-cell_4198	1283.07	13539.3	Cardiac fibroblasts
sample_2d_r2_s1-cell_4200	1449.38	13481.1	Cardiac fibroblasts
sample_2d_r2_s1-cell_4205	1036.4	13499.9	Cardiac fibroblasts
sample_2d_r2_s1-cell_4212	3151.61	13519.6	Endothelial cells
sample_2d_r2_s1-cell_4217	4224.82	13530	Myeloid cells
sample_2d_r2_s1-cell_4219	4265.68	13532.5	Cardiomyocytes
sample_2d_r2_s1-cell_4220	3857	13506.4	Myeloid cells
sample_2d_r2_s1-cell_4227	4172.8	13388.6	Cardiomyocytes
sample_2d_r2_s1-cell_4234	1115.81	13412.7	Cardiac fibroblasts
sample_2d_r2_s1-cell_4236	3926.36	13396.7	Cardiomyocytes
sample_2d_r2_s1-cell_4237	412.544	13412.4	Cardiac fibroblasts
sample_2d_r2_s1-cell_4248	1011.7	13382.1	Pericytes
sample_2d_r2_s1-cell_4250	1050.28	13327.2	Pericytes
sample_2d_r2_s1-cell_4253	1408.71	13266	Cardiac fibroblasts
sample_2d_r2_s1-cell_4256	4084.63	13387.5	Cardiomyocytes
sample_2d_r2_s1-cell_4259	3980.01	13343.5	Endothelial cells
sample_2d_r2_s1-cell_4267	4266.14	13329.9	Endothelial cells
sample_2d_r2_s1-cell_4270	3798.8	13253.6	Cardiac fibroblasts
sample_2d_r2_s1-cell_4278	3441.08	13289.4	Myeloid cells
sample_2d_r2_s1-cell_4279	4195.71	13259.9	Cardiomyocytes Nppa+
sample_2d_r2_s1-cell_4280	3210.69	13123.9	Myeloid cells
sample_2d_r2_s1-cell_4283	3953.49	13224.3	Cardiomyocytes
sample_2d_r2_s1-cell_4284	4046.79	13249.9	Cardiomyocytes
sample_2d_r2_s1-cell_4287	1107.12	13181.7	Cardiac fibroblasts
sample_2d_r2_s1-cell_4296	1174.13	13106.5	Myeloid cells
sample_2d_r2_s1-cell_4300	1012.48	13192.5	Lymphoid cells
sample_2d_r2_s1-cell_4302	4120.32	13219.3	Cardiomyocytes Nppa+
sample_2d_r2_s1-cell_4304	4073.29	13175.5	Cardiac fibroblasts
sample_2d_r2_s1-cell_4305	3841.63	13157.4	Cardiomyocytes
sample_2d_r2_s1-cell_4311	4201.02	13125.5	Cardiomyocytes Nppa+
sample_2d_r2_s1-cell_4314	3642.73	13116	Cardiac fibroblasts
sample_2d_r2_s1-cell_4320	1287.93	13097.7	Pericytes
sample_2d_r2_s1-cell_4323	3969.71	13092.9	Cardiac fibroblasts
sample_2d_r2_s1-cell_4324	4093.39	13104.4	Cardiomyocytes Nppa+
sample_2d_r2_s1-cell_4328	4032.59	13121.6	Cardiac fibroblasts
sample_2d_r2_s1-cell_4330	3721.08	13090.3	Cardiac fibroblasts
sample_2d_r2_s1-cell_4331	3862.07	13011.8	Cardiomyocytes Nppa+
sample_2d_r2_s1-cell_4332	1724.78	13033.9	Cardiac fibroblasts
sample_2d_r2_s1-cell_4334	4060.58	13021.9	Cardiomyocytes Nppa+
sample_2d_r2_s1-cell_4339	3649.88	13061	Cardiac fibroblasts
sample_2d_r2_s1-cell_4340	3754.72	12922.2	Cardiomyocytes Nppa+
sample_2d_r2_s1-cell_4342	1248.28	12934.4	Cardiac fibroblasts
sample_2d_r2_s1-cell_4345	4222.48	13033.9	Cardiomyocytes Nppa+
sample_2d_r2_s1-cell_4346	4157.19	12955.7	Cardiomyocytes Nppa+
sample_2d_r2_s1-cell_4348	3523.68	12947.9	Cardiac fibroblasts
sample_2d_r2_s1-cell_4349	4241.08	12967.6	Myeloid cells
sample_2d_r2_s1-cell_4353	1786.76	12886.4	Cardiac fibroblasts
sample_2d_r2_s1-cell_4364	3602.6	12957.1	Cardiomyocytes Nppa+
sample_2d_r2_s1-cell_4365	4038.04	12913	Cardiomyocytes Nppa+
sample_2d_r2_s1-cell_4366	1189.23	12960.2	Endothelial cells
sample_2d_r2_s1-cell_4369	1341.49	12900.1	Endothelial cells
sample_2d_r2_s1-cell_4372	1095.45	12800.9	Lymphoid cells
sample_2d_r2_s1-cell_4377	3833.58	12924.1	Cardiomyocytes Nppa+
sample_2d_r2_s1-cell_4378	4257.98	12920.4	Myeloid cells
sample_2d_r2_s1-cell_4379	1022.47	12925.7	Endothelial cells
sample_2d_r2_s1-cell_4380	1716.07	12892.3	Cardiac fibroblasts
sample_2d_r2_s1-cell_4383	3661.96	12805.5	Cardiomyocytes Nppa+
sample_2d_r2_s1-cell_4389	989.314	12881.2	Cardiac fibroblasts
sample_2d_r2_s1-cell_4394	3988.77	12806	Cardiomyocytes Nppa+
sample_2d_r2_s1-cell_4396	4179.72	12855	Endocardial cells
sample_2d_r2_s1-cell_4405	981.095	12794.5	Myeloid cells
sample_2d_r2_s1-cell_4406	4129.86	12806.6	Myeloid cells
sample_2d_r2_s1-cell_4408	1245.51	12732.9	Myeloid cells
sample_2d_r2_s1-cell_4417	1934.5	12740.2	Cardiac fibroblasts
sample_2d_r2_s1-cell_4419	3118.5	12708.9	Myeloid cells
sample_2d_r2_s1-cell_4421	1316.14	12797.9	Endothelial cells
sample_2d_r2_s1-cell_4427	2860.98	12780.3	Endothelial cells
sample_2d_r2_s1-cell_4428	1524.38	12753.8	Cardiac fibroblasts
sample_2d_r2_s1-cell_4429	3417.09	12771.2	Myeloid cells
sample_2d_r2_s1-cell_4430	3788.27	12799.2	Cardiomyocytes Nppa+
sample_2d_r2_s1-cell_4434	3467	12754.1	Myeloid cells
sample_2d_r2_s1-cell_4435	3814.53	12767.4	Endothelial cells
sample_2d_r2_s1-cell_4436	3854.93	12691.3	Cardiomyocytes
sample_2d_r2_s1-cell_4437	1564.22	12616.8	Myeloid cells
sample_2d_r2_s1-cell_4438	2917.54	12762.6	Endothelial cells
sample_2d_r2_s1-cell_4439	3882.67	12778	Myeloid cells
sample_2d_r2_s1-cell_4440	1285.43	12708.8	Endothelial cells
sample_2d_r2_s1-cell_4442	4085.08	12744.3	Cardiomyocytes
sample_2d_r2_s1-cell_4443	3511.68	12730.8	Endothelial cells
sample_2d_r2_s1-cell_4447	3935.17	12724.2	Cardiomyocytes
sample_2d_r2_s1-cell_4449	3621.83	12641.7	Cardiomyocytes Nppa+
sample_2d_r2_s1-cell_4450	447.564	12690.9	Endothelial cells
sample_2d_r2_s1-cell_4452	3242.3	12608	Myeloid cells
sample_2d_r2_s1-cell_4454	2864.53	12703.4	Endothelial cells
sample_2d_r2_s1-cell_4469	2821.22	12660.5	Endothelial cells
sample_2d_r2_s1-cell_4470	3433.86	12686.8	Myeloid cells
sample_2d_r2_s1-cell_4472	3922.66	12674.8	Cardiomyocytes
sample_2d_r2_s1-cell_4473	3363.15	12579.8	Cardiac fibroblasts
sample_2d_r2_s1-cell_4475	3970.47	12660.1	Cardiomyocytes
sample_2d_r2_s1-cell_4477	3476.95	12616.1	Cardiac fibroblasts
sample_2d_r2_s1-cell_4478	3749.32	12658.7	Endothelial cells
sample_2d_r2_s1-cell_4480	2878.42	12585.7	Cardiomyocytes
sample_2d_r2_s1-cell_4481	4062.7	12655.4	Endocardial cells
sample_2d_r2_s1-cell_4487	1254.51	12609.7	Pericytes
sample_2d_r2_s1-cell_4493	4031.96	12617.4	Endocardial cells
sample_2d_r2_s1-cell_4500	3925.36	12550.4	Cardiomyocytes Nppa+
sample_2d_r2_s1-cell_4503	1614	12580.3	Endothelial cells
sample_2d_r2_s1-cell_4505	3783.98	12617.2	Endothelial cells
sample_2d_r2_s1-cell_4508	1065.74	12530.3	Cardiac fibroblasts
sample_2d_r2_s1-cell_4515	359.298	12530	Cardiac fibroblasts
sample_2d_r2_s1-cell_4517	3826.96	12566.2	Cardiomyocytes Nppa+
sample_2d_r2_s1-cell_4518	3753.55	12487.3	Cardiomyocytes Nppa+
sample_2d_r2_s1-cell_4522	4007.66	12567.1	Endocardial cells
sample_2d_r2_s1-cell_4523	1182.88	12535.4	Endothelial cells
sample_2d_r2_s1-cell_4525	3515.62	12561.8	Endothelial cells
sample_2d_r2_s1-cell_4526	3617.6	12408.3	Cardiomyocytes Nppa+
sample_2d_r2_s1-cell_4529	3434.74	12500	Cardiac fibroblasts
sample_2d_r2_s1-cell_4537	4006.21	12497.5	Cardiac fibroblasts
sample_2d_r2_s1-cell_4538	913.962	12500.6	Cardiac fibroblasts
sample_2d_r2_s1-cell_4539	3170.64	12378.9	Myeloid cells
sample_2d_r2_s1-cell_4541	3836.59	12489.3	Cardiac fibroblasts
sample_2d_r2_s1-cell_4547	3896.84	12420.3	Cardiomyocytes Nppa+
sample_2d_r2_s1-cell_4550	3242.4	12354.3	Myeloid cells
sample_2d_r2_s1-cell_4555	886.786	12436.9	Cardiac fibroblasts
sample_2d_r2_s1-cell_4556	3384.81	12443.2	Cardiac fibroblasts
sample_2d_r2_s1-cell_4557	1072.07	12356	Endothelial cells
sample_2d_r2_s1-cell_4558	1461.41	12419.7	Endothelial cells
sample_2d_r2_s1-cell_4562	3835.12	12420.3	Cardiomyocytes Nppa+
sample_2d_r2_s1-cell_4566	3309.09	12404.5	Myeloid cells
sample_2d_r2_s1-cell_4568	3735.38	12388.8	Cardiomyocytes Nppa+
sample_2d_r2_s1-cell_4569	3432.67	12351.1	Myeloid cells
sample_2d_r2_s1-cell_4570	1415.74	12346.1	Endothelial cells
sample_2d_r2_s1-cell_4576	3835.75	12366.8	Myeloid cells
sample_2d_r2_s1-cell_4577	2866.88	12354.6	Cardiac fibroblasts
sample_2d_r2_s1-cell_4578	900.431	12238.7	Cardiac fibroblasts
sample_2d_r2_s1-cell_4580	3523.09	12325	Endothelial cells
sample_2d_r2_s1-cell_4585	1477.94	12251	Cardiac fibroblasts
sample_2d_r2_s1-cell_4591	3934.53	12317.4	Endocardial cells
sample_2d_r2_s1-cell_4595	3727.66	12295.2	Cardiac fibroblasts
sample_2d_r2_s1-cell_4597	3855.7	12292.7	Myeloid cells
sample_2d_r2_s1-cell_4598	1254.93	12182	Pericytes
sample_2d_r2_s1-cell_4599	3601.62	12272.4	Myeloid cells
sample_2d_r2_s1-cell_4602	2850.45	12262.9	Cardiomyocytes
sample_2d_r2_s1-cell_4603	3118.51	12193.2	Myeloid cells
sample_2d_r2_s1-cell_4607	3072.37	12231.5	Myeloid cells
sample_2d_r2_s1-cell_4608	3564.72	12257.4	Myeloid cells
sample_2d_r2_s1-cell_4609	1176.82	12178.8	Endothelial cells
sample_2d_r2_s1-cell_4610	3793.95	12235.5	Cardiac fibroblasts
sample_2d_r2_s1-cell_4617	3509.24	12231.5	Myeloid cells
sample_2d_r2_s1-cell_4620	3902.68	12244.2	Endocardial cells
sample_2d_r2_s1-cell_4622	3860.88	12261.2	Endocardial cells
sample_2d_r2_s1-cell_4623	3313.92	12173.9	Cardiomyocytes
sample_2d_r2_s1-cell_4624	3744.87	12253.9	Cardiac fibroblasts
sample_2d_r2_s1-cell_4626	3667.35	12249.3	Myeloid cells
sample_2d_r2_s1-cell_4628	3707.13	12219.3	Myeloid cells
sample_2d_r2_s1-cell_4632	3255.73	12213.3	Myeloid cells
sample_2d_r2_s1-cell_4634	1067.08	12171.6	Cardiomyocytes
sample_2d_r2_s1-cell_4637	3639.73	12141.8	Cardiomyocytes
sample_2d_r2_s1-cell_4641	3846.56	12197.4	Myeloid cells
sample_2d_r2_s1-cell_4643	3205.4	12195.5	Myeloid cells
sample_2d_r2_s1-cell_4644	3447.08	12177.5	Pericytes
sample_2d_r2_s1-cell_4645	3741.63	12169.4	Cardiac fibroblasts
sample_2d_r2_s1-cell_4646	3385.44	12119	Cardiac fibroblasts
sample_2d_r2_s1-cell_4648	3883.93	12190.3	Cardiomyocytes
sample_2d_r2_s1-cell_4651	1111.06	12050.4	Endothelial cells
sample_2d_r2_s1-cell_4652	3787.53	12168.9	Cardiac fibroblasts
sample_2d_r2_s1-cell_4653	3567.15	12010.8	Cardiomyocytes Nppa+
sample_2d_r2_s1-cell_4655	1407.76	12108.4	Myeloid cells
sample_2d_r2_s1-cell_4657	939.812	12145.9	Myeloid cells
sample_2d_r2_s1-cell_4660	3880.53	12149.5	Cardiomyocytes
sample_2d_r2_s1-cell_4662	3187.65	12155.6	Myeloid cells
sample_2d_r2_s1-cell_4664	2712.43	12127.6	Smooth muscle cells
sample_2d_r2_s1-cell_4665	3828.33	12108.9	Cardiac fibroblasts
sample_2d_r2_s1-cell_4668	2819.96	12104	Myeloid cells
sample_2d_r2_s1-cell_4676	2970.46	12082.1	Cardiomyocytes
sample_2d_r2_s1-cell_4677	1318.66	12100.2	Pericytes
sample_2d_r2_s1-cell_4679	3774.59	12111.7	Myeloid cells
sample_2d_r2_s1-cell_4682	3473.76	12032.3	Cardiomyocytes
sample_2d_r2_s1-cell_4683	847.998	12067.7	Cardiac fibroblasts
sample_2d_r2_s1-cell_4687	3908.95	12101.3	Endothelial cells
sample_2d_r2_s1-cell_4688	906.315	12050.5	Myeloid cells
sample_2d_r2_s1-cell_4690	3740.01	12088	Myeloid cells
sample_2d_r2_s1-cell_4693	824.671	12091.9	Pericytes
sample_2d_r2_s1-cell_4696	3084.57	12071.6	Endothelial cells
sample_2d_r2_s1-cell_4716	3892.28	12012.9	Cardiac fibroblasts
sample_2d_r2_s1-cell_4727	3069.21	12023.3	Cardiac fibroblasts
sample_2d_r2_s1-cell_4729	1357.66	11997.4	Endothelial cells
sample_2d_r2_s1-cell_4736	3808.21	12010.9	Cardiac fibroblasts
sample_2d_r2_s1-cell_4740	843.627	11900.7	Cardiac fibroblasts
sample_2d_r2_s1-cell_4741	3346.37	11994.8	Endothelial cells
sample_2d_r2_s1-cell_4744	821.91	11981.8	Cardiac fibroblasts
sample_2d_r2_s1-cell_4752	1365.02	11908.4	Pericytes
sample_2d_r2_s1-cell_4754	3050.3	11949.7	Myeloid cells
sample_2d_r2_s1-cell_4757	2694.39	11957.4	Cardiac fibroblasts
sample_2d_r2_s1-cell_4759	3884.71	11938.6	Cardiac fibroblasts
sample_2d_r2_s1-cell_4760	3968.04	11945.4	Endothelial cells
sample_2d_r2_s1-cell_4764	1153.78	11941.5	Myeloid cells
sample_2d_r2_s1-cell_4765	3324.4	11888.6	Myeloid cells
sample_2d_r2_s1-cell_4768	3693.47	11773.5	Cardiomyocytes Nppa+
sample_2d_r2_s1-cell_4770	305.119	11928.3	Pericytes
sample_2d_r2_s1-cell_4775	3016.87	11898.5	Pericytes
sample_2d_r2_s1-cell_4776	3458.78	11789.3	Cardiomyocytes Nppa+
sample_2d_r2_s1-cell_4777	3282.95	11889.6	Myeloid cells
sample_2d_r2_s1-cell_4778	1320.3	11788.4	Pericytes
sample_2d_r2_s1-cell_4779	2808.44	11838.8	Myeloid cells
sample_2d_r2_s1-cell_4780	3845.6	11853.1	Cardiac fibroblasts
sample_2d_r2_s1-cell_4781	3628.36	11892.3	Cardiomyocytes Nppa+
sample_2d_r2_s1-cell_4801	1138.37	11843.6	Myeloid cells
sample_2d_r2_s1-cell_4804	3580.79	11846.3	Endothelial cells
sample_2d_r2_s1-cell_4805	1466	11773.8	Pericytes
sample_2d_r2_s1-cell_4816	1943.91	11783	Cardiac fibroblasts
sample_2d_r2_s1-cell_4818	3540.36	11740.1	Cardiac fibroblasts
sample_2d_r2_s1-cell_4820	1533.02	11648.1	Cardiac fibroblasts
sample_2d_r2_s1-cell_4824	3342.92	11641.4	Endothelial cells
sample_2d_r2_s1-cell_4826	1372.09	11765	Myeloid cells
sample_2d_r2_s1-cell_4834	1148.99	11652.8	Endothelial cells
sample_2d_r2_s1-cell_4837	1415.71	11599.5	Endothelial cells
sample_2d_r2_s1-cell_4841	1266.53	11738.5	Lymphoid cells
sample_2d_r2_s1-cell_4843	2067.8	11718.5	Cardiomyocytes
sample_2d_r2_s1-cell_4854	1348.37	11669.6	Cardiac fibroblasts
sample_2d_r2_s1-cell_4856	1846.68	11622	Myeloid cells
sample_2d_r2_s1-cell_4860	1779.7	11617.7	Cardiac fibroblasts
sample_2d_r2_s1-cell_4867	1197.39	11625.5	Endothelial cells
sample_2d_r2_s1-cell_4872	3459.51	11601.7	Cardiomyocytes Nppa+
sample_2d_r2_s1-cell_4873	1087.58	11535	Endothelial cells
sample_2d_r2_s1-cell_4874	1300.3	11502.9	Endothelial cells
sample_2d_r2_s1-cell_4887	1337.51	11598.2	Endothelial cells
sample_2d_r2_s1-cell_4891	3593.17	11515.6	Cardiomyocytes
sample_2d_r2_s1-cell_4898	3519.71	11540.6	Cardiac fibroblasts
sample_2d_r2_s1-cell_4905	1237.58	11515.8	Endothelial cells
sample_2d_r2_s1-cell_4906	3785.16	11422.4	Cardiac fibroblasts
sample_2d_r2_s1-cell_4911	4177.8	11482.7	Cardiomyocytes
sample_2d_r2_s1-cell_4916	4289.97	11524.4	Cardiac fibroblasts
sample_2d_r2_s1-cell_4918	246.557	11523.4	Endothelial cells
sample_2d_r2_s1-cell_4931	3467.37	11512.1	Cardiac fibroblasts
sample_2d_r2_s1-cell_4933	4338.52	11501.5	Cardiac fibroblasts
sample_2d_r2_s1-cell_4935	224.819	11466.9	Cardiac fibroblasts
sample_2d_r2_s1-cell_4942	4239.11	11394.7	Cardiomyocytes
sample_2d_r2_s1-cell_4943	4394.54	11469.1	Myeloid cells
sample_2d_r2_s1-cell_4944	3514.69	11395.6	Cardiac fibroblasts
sample_2d_r2_s1-cell_4952	4334.16	11412.2	Cardiomyocytes
sample_2d_r2_s1-cell_4954	930.744	11419.6	Pericytes
sample_2d_r2_s1-cell_4956	3927.85	11445.2	Myeloid cells
sample_2d_r2_s1-cell_4959	4431.27	11379.7	Cardiomyocytes Nppa+
sample_2d_r2_s1-cell_4960	1239.8	11408.4	Myeloid cells
sample_2d_r2_s1-cell_4961	4493.98	11435.8	Endocardial cells
sample_2d_r2_s1-cell_4965	3975.92	11299.7	Cardiac fibroblasts
sample_2d_r2_s1-cell_4978	3678.07	11317.9	Cardiomyocytes
sample_2d_r2_s1-cell_4982	223.813	11401.8	Cardiac fibroblasts
sample_2d_r2_s1-cell_4985	4502.17	11353.9	Cardiac fibroblasts
sample_2d_r2_s1-cell_4991	3893.95	11377.9	Myeloid cells
sample_2d_r2_s1-cell_4992	4585.56	11392.2	Cardiac fibroblasts
sample_2d_r2_s1-cell_4994	4140.05	11340	Cardiac fibroblasts
sample_2d_r2_s1-cell_4996	3603.02	11370.3	Myeloid cells
sample_2d_r2_s1-cell_4997	1114.03	11355.2	Cardiac fibroblasts
sample_2d_r2_s1-cell_4999	913.938	11307.8	Cardiac fibroblasts
sample_2d_r2_s1-cell_5000	4694.9	11267.2	Cardiomyocytes Nppa+
sample_2d_r2_s1-cell_5005	197.011	11293.1	Cardiac fibroblasts
sample_2d_r2_s1-cell_5006	4567.16	11315.3	Cardiomyocytes Nppa+
sample_2d_r2_s1-cell_5012	4757.04	11320.2	Myeloid cells
sample_2d_r2_s1-cell_5019	4371.93	11264.6	Cardiomyocytes Nppa+
sample_2d_r2_s1-cell_5020	4291.97	11326.9	Cardiac fibroblasts
sample_2d_r2_s1-cell_5021	1145.89	11286.6	Cardiac fibroblasts
sample_2d_r2_s1-cell_5023	4523.8	11284.3	Cardiomyocytes Nppa+
sample_2d_r2_s1-cell_5026	4813.86	11251.8	Cardiomyocytes Nppa+
sample_2d_r2_s1-cell_5027	970.961	11277.5	Endothelial cells
sample_2d_r2_s1-cell_5028	4228.9	11201.3	Cardiomyocytes
sample_2d_r2_s1-cell_5030	4310.58	11266.7	Cardiac fibroblasts
sample_2d_r2_s1-cell_5036	1104.91	11262.6	Cardiac fibroblasts
sample_2d_r2_s1-cell_5038	4582.23	11217.4	Cardiomyocytes Nppa+
sample_2d_r2_s1-cell_5039	4874.78	11276.9	Cardiomyocytes Nppa+
sample_2d_r2_s1-cell_5040	3589.68	11264.7	Cardiac fibroblasts
sample_2d_r2_s1-cell_5043	4638.5	11236.3	Cardiomyocytes Nppa+
sample_2d_r2_s1-cell_5047	1065.68	11230.2	Cardiac fibroblasts
sample_2d_r2_s1-cell_5049	4409.61	11122.4	Cardiomyocytes Nppa+
sample_2d_r2_s1-cell_5055	4968.03	11201.2	Cardiomyocytes Nppa+
sample_2d_r2_s1-cell_5057	4885.89	11192.7	Cardiomyocytes Nppa+
sample_2d_r2_s1-cell_5065	4311.13	11175.6	Cardiac fibroblasts
sample_2d_r2_s1-cell_5066	4520.81	11060.5	Cardiomyocytes Nppa+
sample_2d_r2_s1-cell_5067	4540.96	11151.9	Cardiomyocytes Nppa+
sample_2d_r2_s1-cell_5068	173.927	11145.6	Cardiac fibroblasts
sample_2d_r2_s1-cell_5069	4917.1	11100.5	Cardiomyocytes Nppa+
sample_2d_r2_s1-cell_5071	4613.7	11092.8	Cardiomyocytes Nppa+
sample_2d_r2_s1-cell_5077	4354.97	11162.3	Endothelial cells
sample_2d_r2_s1-cell_5078	1030.68	11066.5	Cardiac fibroblasts
sample_2d_r2_s1-cell_5086	4154.92	11090.5	Cardiac fibroblasts
sample_2d_r2_s1-cell_5087	4652	11116	Cardiomyocytes Nppa+
sample_2d_r2_s1-cell_5093	4997.98	11098.5	Myeloid cells
sample_2d_r2_s1-cell_5102	798.916	11094.6	Cardiac fibroblasts
sample_2d_r2_s1-cell_5112	4816.86	11070.7	Cardiomyocytes Nppa+
sample_2d_r2_s1-cell_5124	3582.54	11040.5	Myeloid cells
sample_2d_r2_s1-cell_5127	5029.26	11030.4	Cardiomyocytes Nppa+
sample_2d_r2_s1-cell_5130	4804.37	10987.1	Cardiomyocytes Nppa+
sample_2d_r2_s1-cell_5131	4455.16	11000	Cardiomyocytes
sample_2d_r2_s1-cell_5132	4891.04	11017.1	Cardiac fibroblasts
sample_2d_r2_s1-cell_5135	4956.14	10971.4	Cardiomyocytes Nppa+
sample_2d_r2_s1-cell_5136	4706.49	10963.7	Cardiac fibroblasts
sample_2d_r2_s1-cell_5137	5052.3	10958.1	Myeloid cells
sample_2d_r2_s1-cell_5142	4636.28	10970.4	Cardiac fibroblasts
sample_2d_r2_s1-cell_5143	840.128	10860.1	Cardiomyocytes
sample_2d_r2_s1-cell_5144	3413.94	10954	Myeloid cells
sample_2d_r2_s1-cell_5158	942.142	10910.5	Endothelial cells
sample_2d_r2_s1-cell_5160	1026.76	10907.5	Endothelial cells
sample_2d_r2_s1-cell_5166	4925.22	10857.7	Cardiomyocytes Nppa+
sample_2d_r2_s1-cell_5168	4659.21	10907.6	Cardiac fibroblasts
sample_2d_r2_s1-cell_5170	4592.93	10822.4	Cardiomyocytes Nppa+
sample_2d_r2_s1-cell_5172	5088.58	10913.1	Cardiomyocytes
sample_2d_r2_s1-cell_5176	4798.9	10887.6	Myeloid cells
sample_2d_r2_s1-cell_5183	4782.09	10788.1	Cardiomyocytes Nppa+
sample_2d_r2_s1-cell_5188	4340.77	10855.7	Myeloid cells
sample_2d_r2_s1-cell_5191	5130.33	10819.5	Cardiomyocytes Nppa+
sample_2d_r2_s1-cell_5201	5204.86	10834.9	Endothelial cells
sample_2d_r2_s1-cell_5202	941.444	10819	Pericytes
sample_2d_r2_s1-cell_5208	5062.59	10745.2	Cardiomyocytes Nppa+
sample_2d_r2_s1-cell_5209	4676.58	10714.4	Endothelial cells
sample_2d_r2_s1-cell_5213	5199.43	10789	Cardiomyocytes Nppa+
sample_2d_r2_s1-cell_5217	1177.32	10707.3	Cardiac fibroblasts
sample_2d_r2_s1-cell_5219	4875.16	10728.1	Cardiomyocytes
sample_2d_r2_s1-cell_5224	5270.78	10743.2	Cardiomyocytes Nppa+
sample_2d_r2_s1-cell_5230	4960.07	10750.9	Myeloid cells
sample_2d_r2_s1-cell_5235	5206.77	10723	Cardiomyocytes Nppa+
sample_2d_r2_s1-cell_5239	4983.19	10716.8	Myeloid cells
sample_2d_r2_s1-cell_5242	5137.31	10703.4	Cardiomyocytes Nppa+
sample_2d_r2_s1-cell_5246	4923.9	10683.4	Myeloid cells
sample_2d_r2_s1-cell_5250	948.304	10679	Endothelial cells
sample_2d_r2_s1-cell_5253	4586.14	10665.6	Endothelial cells
sample_2d_r2_s1-cell_5256	5181.06	10670.6	Cardiomyocytes Nppa+
sample_2d_r2_s1-cell_5257	5266.81	10665.7	Cardiomyocytes Nppa+
sample_2d_r2_s1-cell_5259	5408.2	10669.3	Cardiomyocytes Nppa+
sample_2d_r2_s1-cell_5261	5374.73	10632.4	Cardiomyocytes Nppa+
sample_2d_r2_s1-cell_5276	4748.24	10665.7	Endothelial cells
sample_2d_r2_s1-cell_5285	4959.16	10643.5	Myeloid cells
sample_2d_r2_s1-cell_5289	5060.57	10618.8	Cardiomyocytes Nppa+
sample_2d_r2_s1-cell_5290	5116.87	10642.6	Cardiomyocytes Nppa+
sample_2d_r2_s1-cell_5297	4833.04	10626.7	Endothelial cells
sample_2d_r2_s1-cell_5299	4908.34	10635.8	Myeloid cells
sample_2d_r2_s1-cell_5300	5001.25	10616.4	Cardiomyocytes Nppa+
sample_2d_r2_s1-cell_5302	5317.07	10557.4	Cardiomyocytes Nppa+
sample_2d_r2_s1-cell_5303	5190.16	10624.5	Cardiomyocytes Nppa+
sample_2d_r2_s1-cell_5304	4737.8	10616.8	Endothelial cells
sample_2d_r2_s1-cell_5307	4610.29	10567.1	Myeloid cells
sample_2d_r2_s1-cell_5309	5234.32	10590.1	Cardiomyocytes Nppa+
sample_2d_r2_s1-cell_5310	832.472	10574.8	Endothelial cells
sample_2d_r2_s1-cell_5316	5115.07	10599.3	Cardiomyocytes Nppa+
sample_2d_r2_s1-cell_5317	4914.44	10600.2	Cardiac fibroblasts
sample_2d_r2_s1-cell_5320	5430.94	10562	Cardiomyocytes Nppa+
sample_2d_r2_s1-cell_5321	4877.11	10588	Cardiac fibroblasts
sample_2d_r2_s1-cell_5324	4955.32	10561.8	Cardiac fibroblasts
sample_2d_r2_s1-cell_5326	4880.88	10495.2	Myeloid cells
sample_2d_r2_s1-cell_5329	5136.89	10569.6	Cardiomyocytes Nppa+
sample_2d_r2_s1-cell_5330	5049.62	10507.8	Cardiomyocytes Nppa+
sample_2d_r2_s1-cell_5331	5203.87	10538.1	Cardiomyocytes Nppa+
sample_2d_r2_s1-cell_5332	4922.07	10573.7	Cardiac fibroblasts
sample_2d_r2_s1-cell_5335	972.27	10490.7	Cardiac fibroblasts
sample_2d_r2_s1-cell_5345	5011.55	10544.5	Cardiomyocytes Nppa+
sample_2d_r2_s1-cell_5349	5386.31	10532.6	Cardiomyocytes Nppa+
sample_2d_r2_s1-cell_5354	5471.01	10433.9	Cardiomyocytes Nppa+
sample_2d_r2_s1-cell_5355	5138.28	10519.3	Cardiomyocytes Nppa+
sample_2d_r2_s1-cell_5359	820.22	10511.3	Cardiac fibroblasts
sample_2d_r2_s1-cell_5362	4985.61	10498.4	Cardiomyocytes Nppa+
sample_2d_r2_s1-cell_5366	5256.97	10455	Cardiomyocytes Nppa+
sample_2d_r2_s1-cell_5368	5374.08	10444.5	Cardiomyocytes Nppa+
sample_2d_r2_s1-cell_5369	739.924	10446.9	Cardiomyocytes
sample_2d_r2_s1-cell_5374	5062.73	10427.6	Cardiomyocytes Nppa+
sample_2d_r2_s1-cell_5375	5155.65	10421.7	Cardiomyocytes Nppa+
sample_2d_r2_s1-cell_5378	854.549	10410.4	Cardiac fibroblasts
sample_2d_r2_s1-cell_5393	4994.34	10421.8	Cardiomyocytes Nppa+
sample_2d_r2_s1-cell_5405	5298.11	10391.4	Cardiomyocytes Nppa+
sample_2d_r2_s1-cell_5424	5370.92	10359	Cardiomyocytes Nppa+
sample_2d_r2_s1-cell_5428	773.89	10357.6	Myeloid cells
sample_2d_r2_s1-cell_5429	5078.54	10335.6	Cardiomyocytes Nppa+
sample_2d_r2_s1-cell_5438	870.21	10252.2	Cardiomyocytes
sample_2d_r2_s1-cell_5442	5215.13	10308.2	Cardiomyocytes
sample_2d_r2_s1-cell_5443	5299.02	10330.6	Smooth muscle cells
sample_2d_r2_s1-cell_5447	5156.87	10319	Cardiomyocytes Nppa+
sample_2d_r2_s1-cell_5450	295.726	10295.3	Myeloid cells
sample_2d_r2_s1-cell_5452	5389.57	10284.2	Cardiomyocytes Nppa+
sample_2d_r2_s1-cell_5457	5468.25	10281	Cardiomyocytes Nppa+
sample_2d_r2_s1-cell_5466	5282.5	10252.6	Cardiomyocytes Nppa+
sample_2d_r2_s1-cell_5471	5054.79	10275.1	Cardiac fibroblasts
sample_2d_r2_s1-cell_5475	4766.12	10189.7	Myeloid cells
sample_2d_r2_s1-cell_5479	4577.76	10230.2	Endothelial cells
sample_2d_r2_s1-cell_5480	5098.25	10268.5	Cardiac fibroblasts
sample_2d_r2_s1-cell_5491	5152.49	10246.1	Cardiac fibroblasts
sample_2d_r2_s1-cell_5495	345.116	10206.9	Cardiac fibroblasts
sample_2d_r2_s1-cell_5497	5202.6	10238.6	Cardiac fibroblasts
sample_2d_r2_s1-cell_5501	5075.34	10235	Cardiac fibroblasts
sample_2d_r2_s1-cell_5505	5379.02	10222.3	Myeloid cells
sample_2d_r2_s1-cell_5506	5495.01	10181.7	Endothelial cells
sample_2d_r2_s1-cell_5516	5440.18	10201.1	Cardiac fibroblasts
sample_2d_r2_s1-cell_5519	5186.94	10205.7	Cardiac fibroblasts
sample_2d_r2_s1-cell_5523	5230.95	10194.5	Endothelial cells
sample_2d_r2_s1-cell_5526	5322.25	10167.9	Cardiomyocytes Nppa+
sample_2d_r2_s1-cell_5530	3425.49	10118.5	Myeloid cells
sample_2d_r2_s1-cell_5532	5264.34	10158.7	Endothelial cells
sample_2d_r2_s1-cell_5533	5137.65	10119.4	Cardiomyocytes
sample_2d_r2_s1-cell_5542	5424.58	10148.5	Cardiomyocytes Nppa+
sample_2d_r2_s1-cell_5546	5378.38	10158	Cardiomyocytes Nppa+
sample_2d_r2_s1-cell_5548	5231.71	10115.3	Endothelial cells
sample_2d_r2_s1-cell_5552	5419.53	10103.1	Cardiomyocytes Nppa+
sample_2d_r2_s1-cell_5563	5258.21	10037.1	Cardiomyocytes Nppa+
sample_2d_r2_s1-cell_5564	915.92	10072.1	Cardiac fibroblasts
sample_2d_r2_s1-cell_5565	5275.98	10098.4	Cardiomyocytes
sample_2d_r2_s1-cell_5577	5371.82	10030.9	Cardiomyocytes Nppa+
sample_2d_r2_s1-cell_5580	5501.01	10022.6	Cardiomyocytes Nppa+
sample_2d_r2_s1-cell_5581	868.703	9960.65	Cardiomyocytes Nppa+
sample_2d_r2_s1-cell_5583	5174.89	10034.8	Endothelial cells
sample_2d_r2_s1-cell_5584	4029.54	9973.52	Myeloid cells
sample_2d_r2_s1-cell_5585	767.917	10036.7	Cardiomyocytes
sample_2d_r2_s1-cell_5589	806.906	10016.9	Cardiomyocytes Nppa+
sample_2d_r2_s1-cell_5601	5094.74	10027	Endothelial cells
sample_2d_r2_s1-cell_5605	721.346	10025	Endothelial cells
sample_2d_r2_s1-cell_5608	979.78	9950.01	Cardiac fibroblasts
sample_2d_r2_s1-cell_5614	5303.82	9995.45	Cardiomyocytes Nppa+
sample_2d_r2_s1-cell_5622	5595.57	9925.28	Cardiomyocytes Nppa+
sample_2d_r2_s1-cell_5630	5083.13	9972.78	Cardiac fibroblasts
sample_2d_r2_s1-cell_5631	758.084	9968.65	Cardiac fibroblasts
sample_2d_r2_s1-cell_5633	5169.93	9919.03	Cardiomyocytes Nppa+
sample_2d_r2_s1-cell_5636	5410.76	9971.52	Endothelial cells
sample_2d_r2_s1-cell_5643	5364.43	9899.17	Cardiomyocytes Nppa+
sample_2d_r2_s1-cell_5647	5503.38	9941.9	Cardiomyocytes Nppa+
sample_2d_r2_s1-cell_5650	5212.49	9847.66	Myeloid cells
sample_2d_r2_s1-cell_5651	5298.5	9948.58	Myeloid cells
sample_2d_r2_s1-cell_5654	781.665	9917.16	Cardiomyocytes Nppa+
sample_2d_r2_s1-cell_5655	5093.23	9930.32	Endothelial cells
sample_2d_r2_s1-cell_5663	5489.01	9858.5	Cardiomyocytes Nppa+
sample_2d_r2_s1-cell_5664	5289.6	9856.84	Myeloid cells
sample_2d_r2_s1-cell_5668	5075.3	9776.11	Endothelial cells
sample_2d_r2_s1-cell_5671	4899.32	9760.89	Pericytes
sample_2d_r2_s1-cell_5679	889.364	9759.81	Cardiomyocytes
sample_2d_r2_s1-cell_5683	5629.85	9846.26	Cardiac fibroblasts
sample_2d_r2_s1-cell_5690	816.816	9849.73	Cardiac fibroblasts
sample_2d_r2_s1-cell_5693	984.669	9812.65	Cardiomyocytes
sample_2d_r2_s1-cell_5698	5690.18	9815.22	Endothelial cells
sample_2d_r2_s1-cell_5707	5259.71	9764.24	Cardiac fibroblasts
sample_2d_r2_s1-cell_5711	5540.07	9790.27	Myeloid cells
sample_2d_r2_s1-cell_5714	5637.51	9793.1	Cardiac fibroblasts
sample_2d_r2_s1-cell_5715	5599.43	9783.57	Myeloid cells
sample_2d_r2_s1-cell_5720	5674.04	9775.81	Cardiomyocytes Nppa+
sample_2d_r2_s1-cell_5731	5569.05	9715.28	Endothelial cells
sample_2d_r2_s1-cell_5732	5515.82	9705.34	Smooth muscle cells
sample_2d_r2_s1-cell_5734	5628.45	9736.44	Cardiomyocytes Nppa+
sample_2d_r2_s1-cell_5737	5702.09	9730.92	Cardiomyocytes Nppa+
sample_2d_r2_s1-cell_5741	829.594	9692.82	Cardiac fibroblasts
sample_2d_r2_s1-cell_5748	5132.2	9637.16	Myeloid cells
sample_2d_r2_s1-cell_5756	4767.27	9616.43	Myeloid cells
sample_2d_r2_s1-cell_5757	5224.03	9634.15	Cardiomyocytes Nppa+
sample_2d_r2_s1-cell_5758	5687.13	9675.25	Cardiomyocytes Nppa+
sample_2d_r2_s1-cell_5759	5773.34	9688.61	Endocardial cells
sample_2d_r2_s1-cell_5766	5759.08	9667.32	Cardiomyocytes Nppa+
sample_2d_r2_s1-cell_5768	4923.99	9565.94	Endothelial cells
sample_2d_r2_s1-cell_5774	5599.3	9659.82	Endothelial cells
sample_2d_r2_s1-cell_5785	5627.96	9660.95	Myeloid cells
sample_2d_r2_s1-cell_5788	5654.81	9626.6	Cardiomyocytes Nppa+
sample_2d_r2_s1-cell_5791	5729.42	9581.41	Cardiomyocytes Nppa+
sample_2d_r2_s1-cell_5796	5604.41	9572.47	Cardiomyocytes
sample_2d_r2_s1-cell_5799	5695.68	9619.97	Cardiomyocytes Nppa+
sample_2d_r2_s1-cell_5805	846.795	9587.2	Cardiac fibroblasts
sample_2d_r2_s1-cell_5806	5844.73	9589.34	Pericytes
sample_2d_r2_s1-cell_5807	5493.34	9598.17	Endothelial cells
sample_2d_r2_s1-cell_5808	5777.66	9565.98	Cardiomyocytes Nppa+
sample_2d_r2_s1-cell_5810	4403.22	9546.84	Myeloid cells
sample_2d_r2_s1-cell_5811	5018.37	9515.1	Endothelial cells
sample_2d_r2_s1-cell_5815	5422.69	9452.76	Cardiomyocytes
sample_2d_r2_s1-cell_5816	5534.5	9525.73	Cardiac fibroblasts
sample_2d_r2_s1-cell_5819	957.149	9434.59	Cardiomyocytes
sample_2d_r2_s1-cell_5821	4208.44	9551.91	Cardiac fibroblasts
sample_2d_r2_s1-cell_5822	5815.95	9512.38	Cardiomyocytes Nppa+
sample_2d_r2_s1-cell_5824	5159.56	9490.78	Cardiomyocytes
sample_2d_r2_s1-cell_5832	856.625	9482.4	Cardiac fibroblasts
sample_2d_r2_s1-cell_5844	5573.5	9437.28	Cardiomyocytes
sample_2d_r2_s1-cell_5845	4220.94	9495.51	Myeloid cells
sample_2d_r2_s1-cell_5847	4524.04	9387.47	Cardiomyocytes
sample_2d_r2_s1-cell_5848	4604.79	9411.11	Cardiac fibroblasts
sample_2d_r2_s1-cell_5849	5703.18	9462.17	Cardiomyocytes Nppa+
sample_2d_r2_s1-cell_5850	5631.18	9421.87	Cardiomyocytes Nppa+
sample_2d_r2_s1-cell_5856	5767.16	9433.78	Cardiomyocytes Nppa+
sample_2d_r2_s1-cell_5859	5884.88	9413.34	Cardiomyocytes Nppa+
sample_2d_r2_s1-cell_5860	5511.61	9417.39	Pericytes
sample_2d_r2_s1-cell_5861	4337.79	9341.26	Myeloid cells
sample_2d_r2_s1-cell_5871	5807.8	9356.59	Cardiomyocytes Nppa+
sample_2d_r2_s1-cell_5875	5152.14	9368.47	Myeloid cells
sample_2d_r2_s1-cell_5879	4873.68	9391.15	Endothelial cells
sample_2d_r2_s1-cell_5880	5723.93	9354.85	Cardiomyocytes Nppa+
sample_2d_r2_s1-cell_5882	1053.09	9367.58	Pericytes
sample_2d_r2_s1-cell_5885	5655.47	9395.16	Myeloid cells
sample_2d_r2_s1-cell_5892	1097.95	9375.9	Cardiac fibroblasts
sample_2d_r2_s1-cell_5896	5609.73	9312.07	Myeloid cells
sample_2d_r2_s1-cell_5898	5489.3	9291.1	Cardiac fibroblasts
sample_2d_r2_s1-cell_5899	5666.56	9304.93	Cardiomyocytes Nppa+
sample_2d_r2_s1-cell_5901	5258.35	9360.03	Cardiac fibroblasts
sample_2d_r2_s1-cell_5904	5185.49	9213.45	Cardiomyocytes Nppa+
sample_2d_r2_s1-cell_5907	5852.84	9261.59	Cardiomyocytes Nppa+
sample_2d_r2_s1-cell_5909	1100.37	9209.67	Cardiac fibroblasts
sample_2d_r2_s1-cell_5914	781.475	9300.61	Endothelial cells
sample_2d_r2_s1-cell_5930	4243.39	9216.28	Myeloid cells
sample_2d_r2_s1-cell_5944	5347.59	9160.36	Myeloid cells
sample_2d_r2_s1-cell_5952	5727.13	9221.33	Cardiomyocytes Nppa+
sample_2d_r2_s1-cell_5965	5586.89	9132.59	Myeloid cells
sample_2d_r2_s1-cell_5966	4501.87	9192.99	Myeloid cells
sample_2d_r2_s1-cell_5974	4865.16	9201.17	Cardiac fibroblasts
sample_2d_r2_s1-cell_5978	5251.48	9194.94	Myeloid cells
sample_2d_r2_s1-cell_5979	5464.2	9190.4	Myeloid cells
sample_2d_r2_s1-cell_5987	4842.38	9159.57	Cardiac fibroblasts
sample_2d_r2_s1-cell_5993	5773.27	9135.08	Cardiac fibroblasts
sample_2d_r2_s1-cell_5996	5824.82	9170.04	Cardiomyocytes Nppa+
sample_2d_r2_s1-cell_5997	5740.93	9168.67	Cardiac fibroblasts
sample_2d_r2_s1-cell_6003	4912.02	9069.88	Cardiac fibroblasts
sample_2d_r2_s1-cell_6006	5701.1	9144.91	Myeloid cells
sample_2d_r2_s1-cell_6008	5832.79	9109.62	Cardiomyocytes Nppa+
sample_2d_r2_s1-cell_6011	5208.79	9098.71	Endothelial cells
sample_2d_r2_s1-cell_6018	5973.18	9028.71	Cardiomyocytes Nppa+
sample_2d_r2_s1-cell_6022	5679.01	9044.89	Myeloid cells
sample_2d_r2_s1-cell_6023	1168.22	8998.42	Cardiomyocytes
sample_2d_r2_s1-cell_6026	5260.54	9080.69	Cardiac fibroblasts
sample_2d_r2_s1-cell_6033	5509.21	9064.09	Myeloid cells
sample_2d_r2_s1-cell_6039	5409.34	9014.12	Cardiomyocytes
sample_2d_r2_s1-cell_6040	5747.08	9056.83	Cardiac fibroblasts
sample_2d_r2_s1-cell_6043	777.334	8987.68	Myeloid cells
sample_2d_r2_s1-cell_6046	5262.6	8995.94	Endothelial cells
sample_2d_r2_s1-cell_6052	5074.97	8991.09	Cardiac fibroblasts
sample_2d_r2_s1-cell_6054	5891.72	8989.41	Cardiomyocytes Nppa+
sample_2d_r2_s1-cell_6055	5839.49	8937.39	Cardiomyocytes Nppa+
sample_2d_r2_s1-cell_6056	5775.52	9025.71	Myeloid cells
sample_2d_r2_s1-cell_6059	5483.55	8926.4	Endothelial cells
sample_2d_r2_s1-cell_6062	5732.87	8961.89	Cardiomyocytes Nppa+
sample_2d_r2_s1-cell_6065	5787.23	8987.75	Cardiac fibroblasts
sample_2d_r2_s1-cell_6067	1466.32	8963.49	Endothelial cells
sample_2d_r2_s1-cell_6071	5324.63	8974.79	Endothelial cells
sample_2d_r2_s1-cell_6084	5624.93	8934	Lymphoid cells
sample_2d_r2_s1-cell_6085	5419.39	8948.96	Endothelial cells
sample_2d_r2_s1-cell_6086	5674.74	8939.8	Cardiomyocytes Nppa+
sample_2d_r2_s1-cell_6090	1254.88	8917.23	Myeloid cells
sample_2d_r2_s1-cell_6102	5581.69	8786.35	Cardiomyocytes
sample_2d_r2_s1-cell_6105	5907.6	8811.39	Cardiomyocytes Nppa+
sample_2d_r2_s1-cell_6117	5784.07	8854.2	Cardiomyocytes Nppa+
sample_2d_r2_s1-cell_6118	4903.55	8857.61	Myeloid cells
sample_2d_r2_s1-cell_6119	797.345	8863.17	Myeloid cells
sample_2d_r2_s1-cell_6123	6055.07	8830.72	Cardiomyocytes Nppa+
sample_2d_r2_s1-cell_6124	5680.92	8883.44	Myeloid cells
sample_2d_r2_s1-cell_6125	1292.96	8859.32	Endothelial cells
sample_2d_r2_s1-cell_6129	5727.83	8861.55	Cardiomyocytes Nppa+
sample_2d_r2_s1-cell_6130	6111.98	8860.98	Cardiomyocytes Nppa+
sample_2d_r2_s1-cell_6143	5695.45	8818	Cardiomyocytes Nppa+
sample_2d_r2_s1-cell_6148	5091.23	8742.53	Myeloid cells
sample_2d_r2_s1-cell_6161	6105.8	8765.59	Cardiomyocytes Nppa+
sample_2d_r2_s1-cell_6171	5761.29	8708.41	Cardiomyocytes Nppa+
sample_2d_r2_s1-cell_6184	6148.3	8734.69	Cardiac fibroblasts
sample_2d_r2_s1-cell_6188	6042.97	8669.21	Cardiomyocytes Nppa+
sample_2d_r2_s1-cell_6189	6192.31	8714.72	Endocardial cells
sample_2d_r2_s1-cell_6202	6171.75	8623.86	Cardiomyocytes Nppa+
sample_2d_r2_s1-cell_6209	5526.88	8508.89	Myeloid cells
sample_2d_r2_s1-cell_6214	5862.71	8592.26	Cardiomyocytes Nppa+
sample_2d_r2_s1-cell_6221	5697.27	8632.22	Endothelial cells
sample_2d_r2_s1-cell_6236	5776.97	8581.61	Cardiomyocytes Nppa+
sample_2d_r2_s1-cell_6237	5707.99	8566.52	Cardiac fibroblasts
sample_2d_r2_s1-cell_6241	5902.03	8507.08	Cardiac fibroblasts
sample_2d_r2_s1-cell_6242	6092.95	8561.24	Cardiomyocytes Nppa+
sample_2d_r2_s1-cell_6244	6005.44	8462.97	Cardiomyocytes Nppa+
sample_2d_r2_s1-cell_6257	1269.96	8516.08	Cardiomyocytes
sample_2d_r2_s1-cell_6262	6262.11	8477.11	Cardiomyocytes Nppa+
sample_2d_r2_s1-cell_6264	6134.34	8517.37	Cardiomyocytes Nppa+
sample_2d_r2_s1-cell_6273	6085.13	8478.15	Cardiomyocytes Nppa+
sample_2d_r2_s1-cell_6278	5744.54	8487.91	Cardiac fibroblasts
sample_2d_r2_s1-cell_6286	5681.72	8476.25	Cardiac fibroblasts
sample_2d_r2_s1-cell_6287	5818.13	8503.26	Cardiomyocytes Nppa+
sample_2d_r2_s1-cell_6291	4942.42	8475.66	Myeloid cells
sample_2d_r2_s1-cell_6302	6153.28	8461.39	Cardiomyocytes Nppa+
sample_2d_r2_s1-cell_6304	1414.99	8407.33	Cardiac fibroblasts
sample_2d_r2_s1-cell_6311	6186.09	8420.92	Cardiac fibroblasts
sample_2d_r2_s1-cell_6313	5807.79	8376.52	Cardiomyocytes Nppa+
sample_2d_r2_s1-cell_6327	6347.59	8405.08	Cardiomyocytes Nppa+
sample_2d_r2_s1-cell_6332	5906.75	8407.85	Myeloid cells
sample_2d_r2_s1-cell_6334	5713.74	8401.93	Myeloid cells
sample_2d_r2_s1-cell_6342	6249.08	8391.85	Cardiomyocytes Nppa+
sample_2d_r2_s1-cell_6344	5673.07	8355.15	Myeloid cells
sample_2d_r2_s1-cell_6355	5931	8288.36	Cardiomyocytes
sample_2d_r2_s1-cell_6356	5722.91	8343.09	Cardiomyocytes Nppa+
sample_2d_r2_s1-cell_6357	6118.39	8361.26	Myeloid cells
sample_2d_r2_s1-cell_6358	6180.98	8363.67	Myeloid cells
sample_2d_r2_s1-cell_6359	6246.7	8358.06	Cardiomyocytes Nppa+
sample_2d_r2_s1-cell_6361	6394.38	8327.93	Cardiomyocytes Nppa+
sample_2d_r2_s1-cell_6364	6283.85	8287.98	Cardiomyocytes Nppa+
sample_2d_r2_s1-cell_6368	6472.68	8330.87	Cardiomyocytes Nppa+
sample_2d_r2_s1-cell_6371	6078.11	8313.01	Cardiomyocytes Nppa+
sample_2d_r2_s1-cell_6374	6219.14	8231.98	Cardiomyocytes Nppa+
sample_2d_r2_s1-cell_6376	5995.19	8322.11	Endothelial cells
sample_2d_r2_s1-cell_6377	6140.3	8323.73	Cardiomyocytes Nppa+
sample_2d_r2_s1-cell_6384	5837.41	8272.99	Endothelial cells
sample_2d_r2_s1-cell_6387	4910.27	8259.25	Myeloid cells
sample_2d_r2_s1-cell_6388	6478.17	8217.25	Cardiomyocytes Nppa+
sample_2d_r2_s1-cell_6389	4984.65	8277.01	Myeloid cells
sample_2d_r2_s1-cell_6393	6104.25	8233.26	Cardiomyocytes Nppa+
sample_2d_r2_s1-cell_6396	5755.99	8254.1	Cardiomyocytes Nppa+
sample_2d_r2_s1-cell_6397	6354.04	8205.16	Cardiomyocytes Nppa+
sample_2d_r2_s1-cell_6399	6027.69	8254.56	Myeloid cells
sample_2d_r2_s1-cell_6407	1326.61	8197.39	Pericytes
sample_2d_r2_s1-cell_6409	5702.96	8225.42	Myeloid cells
sample_2d_r2_s1-cell_6416	5824.13	8136.09	Cardiomyocytes Nppa+
sample_2d_r2_s1-cell_6417	6164.52	8207.43	Cardiomyocytes Nppa+
sample_2d_r2_s1-cell_6432	6027.1	8191.29	Myeloid cells
sample_2d_r2_s1-cell_6434	5934.12	8178.33	Endothelial cells
sample_2d_r2_s1-cell_6436	5966.19	8173.04	Myeloid cells
sample_2d_r2_s1-cell_6440	6422.41	8155.7	Cardiomyocytes Nppa+
sample_2d_r2_s1-cell_6448	1168.75	8118.58	Cardiac fibroblasts
sample_2d_r2_s1-cell_6449	6532.98	8164.62	Cardiomyocytes Nppa+
sample_2d_r2_s1-cell_6450	6139.18	8160.33	Myeloid cells
sample_2d_r2_s1-cell_6452	6210.78	8118.78	Cardiac fibroblasts
sample_2d_r2_s1-cell_6457	6316.29	8136.28	Endothelial cells
sample_2d_r2_s1-cell_6461	6056.47	8128.1	Myeloid cells
sample_2d_r2_s1-cell_6465	5926.33	7960.3	Cardiomyocytes
sample_2d_r2_s1-cell_6466	6461.95	8042.66	Cardiomyocytes Nppa+
sample_2d_r2_s1-cell_6469	6124.94	8065.77	Cardiomyocytes Nppa+
sample_2d_r2_s1-cell_6473	6293	8052.14	Cardiomyocytes Nppa+
sample_2d_r2_s1-cell_6477	6551.06	8074.46	Cardiomyocytes Nppa+
sample_2d_r2_s1-cell_6488	6391.19	7978.36	Cardiomyocytes Nppa+
sample_2d_r2_s1-cell_6491	4613.68	8034.33	Myeloid cells
sample_2d_r2_s1-cell_6505	6038.63	8044.13	Pericytes
sample_2d_r2_s1-cell_6507	1162.35	8021.19	Cardiac fibroblasts
sample_2d_r2_s1-cell_6521	6250.04	8007.93	Myeloid cells
sample_2d_r2_s1-cell_6528	4782.71	7965.44	Myeloid cells
sample_2d_r2_s1-cell_6534	6227.29	7973.13	Cardiomyocytes
sample_2d_r2_s1-cell_6536	6577.76	7977	Cardiomyocytes Nppa+
sample_2d_r2_s1-cell_6540	6144.43	7995.99	Cardiomyocytes
sample_2d_r2_s1-cell_6545	6039.25	7972.69	Myeloid cells
sample_2d_r2_s1-cell_6553	6319.07	7932.64	Cardiac fibroblasts
sample_2d_r2_s1-cell_6555	6137.33	7909.38	Cardiomyocytes Nppa+
sample_2d_r2_s1-cell_6562	6530.42	7916.96	Cardiomyocytes Nppa+
sample_2d_r2_s1-cell_6570	1854.51	7873.72	Cardiomyocytes
sample_2d_r2_s1-cell_6572	6034.71	7891.63	Cardiomyocytes Nppa+
sample_2d_r2_s1-cell_6578	6279.43	7833.15	Cardiomyocytes Nppa+
sample_2d_r2_s1-cell_6583	6454.82	7840.69	Cardiomyocytes Nppa+
sample_2d_r2_s1-cell_6591	6365.33	7814.41	Cardiomyocytes Nppa+
sample_2d_r2_s1-cell_6592	5774.03	7816.72	Cardiac fibroblasts
sample_2d_r2_s1-cell_6607	6036.66	7842	Endothelial cells
sample_2d_r2_s1-cell_6615	6072.02	7813.95	Cardiomyocytes Nppa+
sample_2d_r2_s1-cell_6622	6177.26	7774.28	Cardiomyocytes Nppa+
sample_2d_r2_s1-cell_6629	1239.87	7766.92	Cardiac fibroblasts
sample_2d_r2_s1-cell_6631	6006.63	7793.1	Myeloid cells
sample_2d_r2_s1-cell_6656	6043.05	7715.66	Cardiomyocytes
sample_2d_r2_s1-cell_6661	5946.52	7727.65	Cardiac fibroblasts
sample_2d_r2_s1-cell_6663	5851.23	7675.04	Cardiomyocytes
sample_2d_r2_s1-cell_6667	5004.38	7676.67	Myeloid cells
sample_2d_r2_s1-cell_6671	5899.38	7735.07	Cardiac fibroblasts
sample_2d_r2_s1-cell_6674	6281.17	7723.09	Endothelial cells
sample_2d_r2_s1-cell_6678	6142.08	7715.89	Cardiac fibroblasts
sample_2d_r2_s1-cell_6686	6196.42	7696.22	Cardiac fibroblasts
sample_2d_r2_s1-cell_6688	6258.72	7670.01	Cardiac fibroblasts
sample_2d_r2_s1-cell_6693	6138.37	7672.2	Endothelial cells
sample_2d_r2_s1-cell_6702	6182.57	7635.4	Cardiomyocytes
sample_2d_r2_s1-cell_6703	5964.26	7654.92	Cardiac fibroblasts
sample_2d_r2_s1-cell_6706	1464.31	7573.02	Cardiomyocytes
sample_2d_r2_s1-cell_6710	5932.07	7635.63	Cardiac fibroblasts
sample_2d_r2_s1-cell_6711	6004.16	7641.68	Cardiac fibroblasts
sample_2d_r2_s1-cell_6712	6066.46	7642.54	Endothelial cells
sample_2d_r2_s1-cell_6713	1290.23	7617.67	Endothelial cells
sample_2d_r2_s1-cell_6714	6116.84	7639.16	Myeloid cells
sample_2d_r2_s1-cell_6728	6145.97	7554.87	Cardiomyocytes
sample_2d_r2_s1-cell_6731	6044.7	7567.98	Cardiomyocytes
sample_2d_r2_s1-cell_6738	5741.32	7531.74	Pericytes
sample_2d_r2_s1-cell_6744	6231.65	7554.44	Endothelial cells
sample_2d_r2_s1-cell_6755	1921.76	7500.57	Endothelial cells
sample_2d_r2_s1-cell_6776	1411.72	7479.57	Cardiomyocytes
sample_2d_r2_s1-cell_6779	6087.38	7506.07	Endothelial cells
sample_2d_r2_s1-cell_6780	1706.54	7385.31	Cardiac fibroblasts
sample_2d_r2_s1-cell_6783	5875.1	7469.12	Cardiac fibroblasts
sample_2d_r2_s1-cell_6784	5976.38	7448.72	Cardiomyocytes Nppa+
sample_2d_r2_s1-cell_6786	6107.19	7458.13	Cardiomyocytes Nppa+
sample_2d_r2_s1-cell_6789	1619.66	7410.66	Cardiac fibroblasts
sample_2d_r2_s1-cell_6791	6207.22	7476.83	Cardiac fibroblasts
sample_2d_r2_s1-cell_6793	1510.6	7344.69	Cardiomyocytes Nppa+
sample_2d_r2_s1-cell_6796	5696.97	7442.65	Cardiac fibroblasts
sample_2d_r2_s1-cell_6812	5806.66	7402.45	Cardiomyocytes
sample_2d_r2_s1-cell_6818	5920.57	7351.66	Cardiomyocytes
sample_2d_r2_s1-cell_6819	6085.51	7384.15	Cardiomyocytes Nppa+
sample_2d_r2_s1-cell_6835	5785.67	7303.94	Cardiomyocytes
sample_2d_r2_s1-cell_6853	6182.25	7309.2	Myeloid cells
sample_2d_r2_s1-cell_6855	1871.61	7171.34	Myeloid cells
sample_2d_r2_s1-cell_6861	6025.17	7326.09	Cardiac fibroblasts
sample_2d_r2_s1-cell_6866	6706.83	7277.87	Cardiomyocytes
sample_2d_r2_s1-cell_6871	6626.11	7280.93	Cardiomyocytes
sample_2d_r2_s1-cell_6878	5241.88	7297.74	Myeloid cells
sample_2d_r2_s1-cell_6879	1373.47	7281.66	Endothelial cells
sample_2d_r2_s1-cell_6882	6795.53	7295.54	Myeloid cells
sample_2d_r2_s1-cell_6885	6492.75	7297.68	Endocardial cells
sample_2d_r2_s1-cell_6888	6530.6	7274.71	Cardiac fibroblasts
sample_2d_r2_s1-cell_6891	6046	7271.09	Myeloid cells
sample_2d_r2_s1-cell_6893	1791.17	7270.74	Cardiac fibroblasts
sample_2d_r2_s1-cell_6894	6751.25	7279.22	Myeloid cells
sample_2d_r2_s1-cell_6895	5979.09	7274.9	Cardiac fibroblasts
sample_2d_r2_s1-cell_6896	1672.16	7202.51	Cardiac fibroblasts
sample_2d_r2_s1-cell_6898	6838.12	7232.9	Cardiomyocytes Nppa+
sample_2d_r2_s1-cell_6902	6763.32	7250.43	Cardiomyocytes Nppa+
sample_2d_r2_s1-cell_6906	6405.04	7265.21	Endocardial cells
sample_2d_r2_s1-cell_6908	6338.1	7223.88	Myeloid cells
sample_2d_r2_s1-cell_6909	6457.54	7226.96	Cardiac fibroblasts
sample_2d_r2_s1-cell_6911	1780.58	7156.78	Cardiac fibroblasts
sample_2d_r2_s1-cell_6913	5905.44	7230.68	Myeloid cells
sample_2d_r2_s1-cell_6919	5980.36	7226.55	Myeloid cells
sample_2d_r2_s1-cell_6920	6099.56	7222.24	Myeloid cells
sample_2d_r2_s1-cell_6921	6196	7204.01	Myeloid cells
sample_2d_r2_s1-cell_6922	5774.05	7224.14	Myeloid cells
sample_2d_r2_s1-cell_6924	6541.15	7181.88	Cardiac fibroblasts
sample_2d_r2_s1-cell_6928	6727.84	7186.7	Cardiomyocytes Nppa+
sample_2d_r2_s1-cell_6931	1372.72	7163.34	Cardiac fibroblasts
sample_2d_r2_s1-cell_6932	6592.11	7172.97	Myeloid cells
sample_2d_r2_s1-cell_6934	6874.06	7174.06	Cardiomyocytes Nppa+
sample_2d_r2_s1-cell_6936	6646.68	7179.16	Cardiac fibroblasts
sample_2d_r2_s1-cell_6937	5584.76	7097.05	Endothelial cells
sample_2d_r2_s1-cell_6939	5811.35	7177.21	Myeloid cells
sample_2d_r2_s1-cell_6940	6501.56	7150.68	Myeloid cells
sample_2d_r2_s1-cell_6942	6930.73	7153.29	Cardiomyocytes Nppa+
sample_2d_r2_s1-cell_6943	5960.22	7119.2	Cardiomyocytes
sample_2d_r2_s1-cell_6944	6118.28	7128.09	Cardiomyocytes Nppa+
sample_2d_r2_s1-cell_6945	6437.37	7161.75	Myeloid cells
sample_2d_r2_s1-cell_6946	6791.64	7130.87	Cardiomyocytes Nppa+
sample_2d_r2_s1-cell_6949	5844.29	7114.24	Myeloid cells
sample_2d_r2_s1-cell_6952	6977.14	7141.46	Endocardial cells
sample_2d_r2_s1-cell_6954	6393.78	7148.73	Myeloid cells
sample_2d_r2_s1-cell_6956	6298.47	7113.51	Cardiomyocytes Nppa+
sample_2d_r2_s1-cell_6962	1706.55	7021.74	Cardiomyocytes
sample_2d_r2_s1-cell_6963	6671.96	7084.32	Cardiomyocytes
sample_2d_r2_s1-cell_6965	6890.23	7088.17	Cardiomyocytes Nppa+
sample_2d_r2_s1-cell_6969	6475.01	7031.7	Cardiomyocytes
sample_2d_r2_s1-cell_6976	6374.95	6968	Cardiomyocytes Nppa+
sample_2d_r2_s1-cell_6978	6787.97	7034.8	Cardiomyocytes Nppa+
sample_2d_r2_s1-cell_6980	6963.84	7082.63	Myeloid cells
sample_2d_r2_s1-cell_6983	1398.71	7062.01	Endothelial cells
sample_2d_r2_s1-cell_6986	6239.29	6995.2	Cardiomyocytes Nppa+
sample_2d_r2_s1-cell_6987	6595.16	7028.7	Cardiac fibroblasts
sample_2d_r2_s1-cell_6990	6155.25	7063.59	Endothelial cells
sample_2d_r2_s1-cell_6998	6995.45	7043.9	Cardiac fibroblasts
sample_2d_r2_s1-cell_7009	6072.33	7045.17	Endothelial cells
sample_2d_r2_s1-cell_7010	6633.73	7036.32	Cardiac fibroblasts
sample_2d_r2_s1-cell_7013	6957.96	7036.59	Myeloid cells
sample_2d_r2_s1-cell_7015	5872.87	7041.91	Pericytes
sample_2d_r2_s1-cell_7016	6904.01	7035.92	Myeloid cells
sample_2d_r2_s1-cell_7019	5663.89	7000.45	Cardiac fibroblasts
sample_2d_r2_s1-cell_7020	6555.15	7025.86	Myeloid cells
sample_2d_r2_s1-cell_7022	6087.72	6967.53	Cardiomyocytes
sample_2d_r2_s1-cell_7033	7047.27	6962.35	Cardiomyocytes Nppa+
sample_2d_r2_s1-cell_7034	1425.08	6966.14	Myeloid cells
sample_2d_r2_s1-cell_7035	5991.99	6976.92	Cardiac fibroblasts
sample_2d_r2_s1-cell_7036	6941.62	6995.25	Cardiomyocytes Nppa+
sample_2d_r2_s1-cell_7037	6700.7	6950.77	Myeloid cells
sample_2d_r2_s1-cell_7038	6653.05	6981.87	Myeloid cells
sample_2d_r2_s1-cell_7039	6875.87	6990.63	Cardiomyocytes Nppa+
sample_2d_r2_s1-cell_7042	6538.07	6926.08	Cardiomyocytes Nppa+
sample_2d_r2_s1-cell_7047	6747.74	6976.8	Cardiomyocytes Nppa+
sample_2d_r2_s1-cell_7054	6804.52	6953	Cardiomyocytes Nppa+
sample_2d_r2_s1-cell_7056	6875.39	6922.42	Cardiomyocytes
sample_2d_r2_s1-cell_7060	5689.23	6873.63	Myeloid cells
sample_2d_r2_s1-cell_7061	6624.68	6920.58	Smooth muscle cells
sample_2d_r2_s1-cell_7063	6754.05	6935.91	Endothelial cells
sample_2d_r2_s1-cell_7070	6152.56	6894.76	Cardiomyocytes
sample_2d_r2_s1-cell_7074	1461.18	6883.42	Cardiac fibroblasts
sample_2d_r2_s1-cell_7081	6795.37	6871.76	Cardiomyocytes
sample_2d_r2_s1-cell_7083	6453.19	6885.05	Cardiomyocytes Nppa+
sample_2d_r2_s1-cell_7084	7011.88	6870.35	Cardiomyocytes Nppa+
sample_2d_r2_s1-cell_7085	2036.28	6749.48	Myeloid cells
sample_2d_r2_s1-cell_7091	6315.57	6852.46	Cardiac fibroblasts
sample_2d_r2_s1-cell_7097	6236.39	6871.03	Cardiac fibroblasts
sample_2d_r2_s1-cell_7098	6642.07	6818.03	Cardiomyocytes Nppa+
sample_2d_r2_s1-cell_7103	6903.06	6835.04	Cardiomyocytes Nppa+
sample_2d_r2_s1-cell_7108	7096.01	6837.48	Myeloid cells
sample_2d_r2_s1-cell_7110	6439.26	6836.16	Endothelial cells
sample_2d_r2_s1-cell_7114	6350.79	6777.94	Endothelial cells
sample_2d_r2_s1-cell_7118	6459.58	6799.55	Myeloid cells
sample_2d_r2_s1-cell_7123	7040.32	6800.13	Endothelial cells
sample_2d_r2_s1-cell_7125	6993.08	6796.77	Endothelial cells
sample_2d_r2_s1-cell_7128	5545.62	6715.54	Myeloid cells
sample_2d_r2_s1-cell_7129	6806.92	6775.02	Cardiac fibroblasts
sample_2d_r2_s1-cell_7130	7110.9	6774.79	Cardiac fibroblasts
sample_2d_r2_s1-cell_7131	1632.55	6716.6	Cardiac fibroblasts
sample_2d_r2_s1-cell_7135	6973.45	6741.85	Cardiomyocytes
sample_2d_r2_s1-cell_7137	5800.92	6681.7	Myeloid cells
sample_2d_r2_s1-cell_7139	6886.48	6742.86	Cardiac fibroblasts
sample_2d_r2_s1-cell_7142	6534.34	6708.09	Cardiomyocytes
sample_2d_r2_s1-cell_7143	7180.21	6742.49	Myeloid cells
sample_2d_r2_s1-cell_7148	7060.53	6679.59	Myeloid cells
sample_2d_r2_s1-cell_7150	6779.99	6661.51	Cardiomyocytes Nppa+
sample_2d_r2_s1-cell_7151	1802.01	6683.78	Cardiomyocytes Nppa+
sample_2d_r2_s1-cell_7155	6681.11	6727.83	Pericytes
sample_2d_r2_s1-cell_7156	7293.31	6722.7	Cardiac fibroblasts
sample_2d_r2_s1-cell_7159	7392.43	6677.48	Cardiomyocytes Nppa+
sample_2d_r2_s1-cell_7161	6878.33	6699.65	Cardiomyocytes Nppa+
sample_2d_r2_s1-cell_7163	7244.89	6624.73	Cardiomyocytes Nppa+
sample_2d_r2_s1-cell_7164	5907.03	6697.19	Cardiac fibroblasts
sample_2d_r2_s1-cell_7170	7179.91	6628.66	Myeloid cells
sample_2d_r2_s1-cell_7174	1765.45	6551.46	Cardiomyocytes Nppa+
sample_2d_r2_s1-cell_7179	6641.02	6620.67	Cardiomyocytes
sample_2d_r2_s1-cell_7188	6915.84	6621.5	Cardiac fibroblasts
sample_2d_r2_s1-cell_7190	7454.56	6659.11	Cardiomyocytes Nppa+
sample_2d_r2_s1-cell_7199	7355.43	6609.51	Cardiomyocytes Nppa+
sample_2d_r2_s1-cell_7202	5707.43	6606.15	Cardiac fibroblasts
sample_2d_r2_s1-cell_7205	6147.02	6604.48	Myeloid cells
sample_2d_r2_s1-cell_7219	7447.67	6579.17	Cardiomyocytes Nppa+
sample_2d_r2_s1-cell_7221	6507.97	6591.85	Cardiac fibroblasts
sample_2d_r2_s1-cell_7227	7134.11	6567.49	Myeloid cells
sample_2d_r2_s1-cell_7239	6813.73	6544.48	Cardiomyocytes Nppa+
sample_2d_r2_s1-cell_7242	5776.77	6515.32	Myeloid cells
sample_2d_r2_s1-cell_7248	7347.03	6534.08	Cardiomyocytes Nppa+
sample_2d_r2_s1-cell_7250	7157.04	6486.43	Cardiomyocytes Nppa+
sample_2d_r2_s1-cell_7251	7378.9	6476.28	Cardiomyocytes Nppa+
sample_2d_r2_s1-cell_7256	7234.34	6508.53	Cardiac fibroblasts
sample_2d_r2_s1-cell_7260	7060.38	6411.42	Cardiomyocytes
sample_2d_r2_s1-cell_7263	7474.06	6476.55	Cardiomyocytes Nppa+
sample_2d_r2_s1-cell_7265	7500.12	6515.9	Cardiomyocytes Nppa+
sample_2d_r2_s1-cell_7269	6781.35	6442.01	Endothelial cells
sample_2d_r2_s1-cell_7273	7310.41	6466.28	Endothelial cells
sample_2d_r2_s1-cell_7277	7662.24	6414.31	Cardiomyocytes Nppa+
sample_2d_r2_s1-cell_7279	7581.72	6415.02	Cardiomyocytes Nppa+
sample_2d_r2_s1-cell_7280	7618.22	6480.08	Cardiomyocytes Nppa+
sample_2d_r2_s1-cell_7287	7246.94	6376	Cardiac fibroblasts
sample_2d_r2_s1-cell_7289	6353.47	6389.02	Myeloid cells
sample_2d_r2_s1-cell_7296	7750.51	6429.16	Cardiomyocytes Nppa+
sample_2d_r2_s1-cell_7298	7508.66	6395.38	Cardiomyocytes Nppa+
sample_2d_r2_s1-cell_7300	7427.57	6399.98	Cardiomyocytes Nppa+
sample_2d_r2_s1-cell_7304	7789.97	6329.27	Cardiomyocytes Nppa+
sample_2d_r2_s1-cell_7319	7723.54	6353.57	Cardiomyocytes Nppa+
sample_2d_r2_s1-cell_7324	7377.1	6331.98	Cardiomyocytes Nppa+
sample_2d_r2_s1-cell_7330	7473.33	6302.49	Cardiomyocytes Nppa+
sample_2d_r2_s1-cell_7337	6956.09	6256.84	Cardiomyocytes
sample_2d_r2_s1-cell_7345	7546.31	6326.95	Cardiomyocytes Nppa+
sample_2d_r2_s1-cell_7346	7116.22	6284.56	Cardiomyocytes
sample_2d_r2_s1-cell_7347	7601.58	6296.26	Cardiomyocytes Nppa+
sample_2d_r2_s1-cell_7350	7689.67	6309.55	Cardiomyocytes Nppa+
sample_2d_r2_s1-cell_7354	8009.11	6263.92	Cardiomyocytes Nppa+
sample_2d_r2_s1-cell_7356	8081.7	6262.53	Cardiomyocytes Nppa+
sample_2d_r2_s1-cell_7361	5527.7	6292.98	Myeloid cells
sample_2d_r2_s1-cell_7365	7658.86	6300.25	Cardiomyocytes Nppa+
sample_2d_r2_s1-cell_7369	7845.04	6285.93	Cardiomyocytes Nppa+
sample_2d_r2_s1-cell_7371	7177.74	6287.1	Myeloid cells
sample_2d_r2_s1-cell_7374	7293.13	6264.1	Cardiac fibroblasts
sample_2d_r2_s1-cell_7378	7539.19	6274.19	Myeloid cells
sample_2d_r2_s1-cell_7384	7235.26	6264.3	Cardiac fibroblasts
sample_2d_r2_s1-cell_7388	8151.53	6247.23	Cardiomyocytes Nppa+
sample_2d_r2_s1-cell_7389	7710.13	6265.71	Cardiomyocytes Nppa+
sample_2d_r2_s1-cell_7390	7370.01	6218.25	Endothelial cells
sample_2d_r2_s1-cell_7391	7815.85	6231.17	Myeloid cells
sample_2d_r2_s1-cell_7392	7937.98	6256.14	Cardiomyocytes Nppa+
sample_2d_r2_s1-cell_7401	7116.28	6171.34	Cardiomyocytes
sample_2d_r2_s1-cell_7402	7526.56	6190.19	Cardiomyocytes Nppa+
sample_2d_r2_s1-cell_7403	7671.72	6227.79	Cardiomyocytes Nppa+
sample_2d_r2_s1-cell_7404	7896.22	6232.28	Cardiomyocytes Nppa+
sample_2d_r2_s1-cell_7411	8229.03	6195.72	Cardiomyocytes Nppa+
sample_2d_r2_s1-cell_7412	2180.85	6209.77	Myeloid cells
sample_2d_r2_s1-cell_7415	7747.27	6215.59	Myeloid cells
sample_2d_r2_s1-cell_7420	7974.15	6165.72	Cardiomyocytes Nppa+
sample_2d_r2_s1-cell_7425	7998.8	6202.75	Cardiomyocytes Nppa+
sample_2d_r2_s1-cell_7428	8154.95	6190.58	Cardiomyocytes Nppa+
sample_2d_r2_s1-cell_7429	7238.81	6168.22	Cardiomyocytes Nppa+
sample_2d_r2_s1-cell_7440	5770.83	6159.36	Myeloid cells
sample_2d_r2_s1-cell_7442	5684.43	6168.96	Endothelial cells
sample_2d_r2_s1-cell_7444	7704.42	6171.47	Myeloid cells
sample_2d_r2_s1-cell_7447	7927.82	6128.39	Cardiomyocytes Nppa+
sample_2d_r2_s1-cell_7448	7660.3	6183.73	Cardiac fibroblasts
sample_2d_r2_s1-cell_7449	8130.48	6122.18	Cardiomyocytes Nppa+
sample_2d_r2_s1-cell_7450	2280.31	6072.21	Myeloid cells
sample_2d_r2_s1-cell_7451	8058.97	6169.5	Cardiomyocytes Nppa+
sample_2d_r2_s1-cell_7459	7842.98	6117.45	Cardiomyocytes
sample_2d_r2_s1-cell_7461	7739.59	6146.18	Myeloid cells
sample_2d_r2_s1-cell_7463	7003.4	6155.84	Endothelial cells
sample_2d_r2_s1-cell_7465	7638.81	6142.56	Myeloid cells
sample_2d_r2_s1-cell_7468	8282.09	6105.47	Cardiomyocytes Nppa+
sample_2d_r2_s1-cell_7472	7246.07	6110.64	Cardiac fibroblasts
sample_2d_r2_s1-cell_7477	7587.13	6131.32	Myeloid cells
sample_2d_r2_s1-cell_7481	8217.03	6092.05	Cardiomyocytes Nppa+
sample_2d_r2_s1-cell_7482	8060.08	6110.16	Cardiomyocytes Nppa+
sample_2d_r2_s1-cell_7484	7380.9	6111.46	Cardiac fibroblasts
sample_2d_r2_s1-cell_7485	7531.18	6114.3	Myeloid cells
sample_2d_r2_s1-cell_7490	5773.36	6090.22	Myeloid cells
sample_2d_r2_s1-cell_7493	7688.24	6059.36	Cardiomyocytes Nppa+
sample_2d_r2_s1-cell_7496	7460.58	6106.76	Myeloid cells
sample_2d_r2_s1-cell_7499	6828.26	6095.21	Myeloid cells
sample_2d_r2_s1-cell_7500	7546.79	6043.58	Cardiomyocytes
sample_2d_r2_s1-cell_7502	8017.03	6064.02	Cardiomyocytes Nppa+
sample_2d_r2_s1-cell_7504	8055.94	6027.18	Cardiomyocytes Nppa+
sample_2d_r2_s1-cell_7506	7809.13	6021.54	Cardiomyocytes
sample_2d_r2_s1-cell_7507	7449.39	6068.23	Myeloid cells
sample_2d_r2_s1-cell_7508	8118.63	6066.52	Cardiomyocytes Nppa+
sample_2d_r2_s1-cell_7509	7228.74	6060.52	Endothelial cells
sample_2d_r2_s1-cell_7514	7953.28	6039.43	Cardiomyocytes Nppa+
sample_2d_r2_s1-cell_7515	8184.73	6061.95	Cardiomyocytes Nppa+
sample_2d_r2_s1-cell_7528	8293.75	6028.66	Cardiomyocytes Nppa+
sample_2d_r2_s1-cell_7533	7111.39	6032.51	Myeloid cells
sample_2d_r2_s1-cell_7537	8351.83	6015.46	Cardiomyocytes Nppa+
sample_2d_r2_s1-cell_7539	7747.08	5976.94	Cardiomyocytes
sample_2d_r2_s1-cell_7540	7339.65	5982.93	Endothelial cells
sample_2d_r2_s1-cell_7541	8152.93	6022.55	Cardiomyocytes Nppa+
sample_2d_r2_s1-cell_7544	8192.83	5990.88	Myeloid cells
sample_2d_r2_s1-cell_7547	8252.6	5995.08	Cardiomyocytes Nppa+
sample_2d_r2_s1-cell_7549	8078.51	5955.57	Cardiomyocytes Nppa+
sample_2d_r2_s1-cell_7550	3456.72	5910.78	Endothelial cells
sample_2d_r2_s1-cell_7552	7444.74	5980.6	Cardiac fibroblasts
sample_2d_r2_s1-cell_7555	7874.39	5949.29	Cardiomyocytes
sample_2d_r2_s1-cell_7559	7623.54	6000.08	Myeloid cells
sample_2d_r2_s1-cell_7562	8404.5	5979.86	Cardiomyocytes Nppa+
sample_2d_r2_s1-cell_7572	8290.77	5958.76	Cardiomyocytes Nppa+
sample_2d_r2_s1-cell_7581	7949.36	5919.93	Endothelial cells
sample_2d_r2_s1-cell_7584	8453.21	5967.48	Cardiomyocytes Nppa+
sample_2d_r2_s1-cell_7586	8359.37	5917.56	Cardiomyocytes Nppa+
sample_2d_r2_s1-cell_7597	8487.21	5942.52	Endocardial cells
sample_2d_r2_s1-cell_7601	8429.02	5912.32	Cardiomyocytes Nppa+
sample_2d_r2_s1-cell_7602	8226.83	5886.37	Myeloid cells
sample_2d_r2_s1-cell_7610	8490	5887.84	Cardiomyocytes Nppa+
sample_2d_r2_s1-cell_7621	8309.93	5894.38	Cardiomyocytes Nppa+
sample_2d_r2_s1-cell_7622	2282.32	5782.06	Cardiomyocytes
sample_2d_r2_s1-cell_7628	2353.75	5820.96	Myeloid cells
sample_2d_r2_s1-cell_7631	8087.15	5877.93	Myeloid cells
sample_2d_r2_s1-cell_7633	7826.04	5840.11	Cardiac fibroblasts
sample_2d_r2_s1-cell_7635	7992.47	5848.7	Myeloid cells
sample_2d_r2_s1-cell_7648	8319.07	5854	Cardiomyocytes Nppa+
sample_2d_r2_s1-cell_7657	7251.5	5810.56	Myeloid cells
sample_2d_r2_s1-cell_7660	8567.85	5852.5	Cardiomyocytes Nppa+
sample_2d_r2_s1-cell_7662	8399.53	5833.51	Myeloid cells
sample_2d_r2_s1-cell_7663	2188.39	5774.34	Endothelial cells
sample_2d_r2_s1-cell_7665	8050.89	5781.97	Cardiomyocytes Nppa+
sample_2d_r2_s1-cell_7666	8226.89	5773.79	Cardiomyocytes Nppa+
sample_2d_r2_s1-cell_7667	8454.78	5803.28	Cardiomyocytes Nppa+
sample_2d_r2_s1-cell_7669	8541.65	5805.41	Cardiomyocytes Nppa+
sample_2d_r2_s1-cell_7675	7889.06	5795.45	Cardiac fibroblasts
sample_2d_r2_s1-cell_7677	8599.88	5787.28	Endocardial cells
sample_2d_r2_s1-cell_7685	8342.71	5810.97	Endothelial cells
sample_2d_r2_s1-cell_7687	3403.43	5684.77	Myeloid cells
sample_2d_r2_s1-cell_7697	3574.75	5753.82	Endothelial cells
sample_2d_r2_s1-cell_7702	7163.56	5762.19	Myeloid cells
sample_2d_r2_s1-cell_7703	8404.86	5739.74	Cardiomyocytes
sample_2d_r2_s1-cell_7707	8331.54	5748.77	Cardiomyocytes
sample_2d_r2_s1-cell_7708	8506.07	5772.17	Cardiomyocytes Nppa+
sample_2d_r2_s1-cell_7713	8129.43	5763.59	Lymphoid cells
sample_2d_r2_s1-cell_7717	7908.74	5754.63	Cardiac fibroblasts
sample_2d_r2_s1-cell_7718	7937.94	5757.3	Cardiac fibroblasts
sample_2d_r2_s1-cell_7721	7313.95	5705.19	Myeloid cells
sample_2d_r2_s1-cell_7742	8091.77	5672.55	Cardiomyocytes Nppa+
sample_2d_r2_s1-cell_7745	2357.67	5639.83	Cardiac fibroblasts
sample_2d_r2_s1-cell_7748	8535.75	5709.59	Cardiac fibroblasts
sample_2d_r2_s1-cell_7758	8214.98	5653.04	Cardiomyocytes Nppa+
sample_2d_r2_s1-cell_7760	7865.31	5624.88	Cardiac fibroblasts
sample_2d_r2_s1-cell_7766	3611.12	5671.77	Lymphoid cells
sample_2d_r2_s1-cell_7770	8193.56	5695.12	Endothelial cells
sample_2d_r2_s1-cell_7771	7956.93	5658.55	Cardiomyocytes
sample_2d_r2_s1-cell_7772	8402.21	5673.69	Cardiomyocytes
sample_2d_r2_s1-cell_7776	2181.9	5670.61	Cardiomyocytes
sample_2d_r2_s1-cell_7778	8009.4	5684.33	Cardiac fibroblasts
sample_2d_r2_s1-cell_7784	8567.08	5675.76	Cardiac fibroblasts
sample_2d_r2_s1-cell_7788	8303.34	5650.46	Endothelial cells
sample_2d_r2_s1-cell_7794	8576.66	5593.78	Cardiac fibroblasts
sample_2d_r2_s1-cell_7803	8398.47	5548.88	Cardiomyocytes Nppa+
sample_2d_r2_s1-cell_7804	8352.07	5611.84	Myeloid cells
sample_2d_r2_s1-cell_7808	8034.54	5624.28	Cardiomyocytes Nppa+
sample_2d_r2_s1-cell_7814	3610.03	5583.38	Lymphoid cells
sample_2d_r2_s1-cell_7815	7944.69	5523.49	Cardiomyocytes
sample_2d_r2_s1-cell_7823	8040.53	5585.43	Cardiomyocytes
sample_2d_r2_s1-cell_7826	8487.64	5559.38	Cardiomyocytes Nppa+
sample_2d_r2_s1-cell_7834	8102.92	5544.17	Cardiomyocytes
sample_2d_r2_s1-cell_7839	9554.23	5570.12	Endothelial cells
sample_2d_r2_s1-cell_7842	3582.17	5559.26	Cardiomyocytes
sample_2d_r2_s1-cell_7851	3567.29	5537.86	Cardiomyocytes
sample_2d_r2_s1-cell_7857	9481.24	5478.39	Cardiomyocytes Nppa+
sample_2d_r2_s1-cell_7860	9367.58	5543.5	Cardiac fibroblasts
sample_2d_r2_s1-cell_7861	2843.73	5396.34	Myeloid cells
sample_2d_r2_s1-cell_7865	8662.43	5516.84	Myeloid cells
sample_2d_r2_s1-cell_7869	8164.94	5481.3	Endothelial cells
sample_2d_r2_s1-cell_7873	9717.54	5526.75	Endothelial cells
sample_2d_r2_s1-cell_7879	9783.01	5536.93	Endocardial cells
sample_2d_r2_s1-cell_7881	9617.21	5451.35	Cardiomyocytes
sample_2d_r2_s1-cell_7888	9869.21	5518.16	Myeloid cells
sample_2d_r2_s1-cell_7891	8510.96	5485.49	Cardiomyocytes
sample_2d_r2_s1-cell_7894	3650.5	5490.73	Endothelial cells
sample_2d_r2_s1-cell_7895	8249.01	5493.74	Myeloid cells
sample_2d_r2_s1-cell_7896	9194.73	5499.72	Cardiac fibroblasts
sample_2d_r2_s1-cell_7897	9282.92	5508.14	Pericytes
sample_2d_r2_s1-cell_7898	9922.82	5444.68	Cardiomyocytes Nppa+
sample_2d_r2_s1-cell_7903	3619.51	5479.33	Endothelial cells
sample_2d_r2_s1-cell_7905	9353.22	5468.05	Cardiomyocytes Nppa+
sample_2d_r2_s1-cell_7907	9996.91	5496.44	Myeloid cells
sample_2d_r2_s1-cell_7908	8020.03	5414.3	Myeloid cells
sample_2d_r2_s1-cell_7910	9742.22	5365.81	Cardiomyocytes
sample_2d_r2_s1-cell_7911	8085.61	5487.89	Cardiomyocytes
sample_2d_r2_s1-cell_7917	10156.6	5369.81	Cardiomyocytes Nppa+
sample_2d_r2_s1-cell_7918	2339.17	5435.88	Cardiomyocytes
sample_2d_r2_s1-cell_7924	9706.16	5466.72	Cardiomyocytes
sample_2d_r2_s1-cell_7925	9825.82	5308.76	Cardiomyocytes
sample_2d_r2_s1-cell_7935	9057.48	5448.39	Lymphoid cells
sample_2d_r2_s1-cell_7937	9168.9	5415.19	Cardiomyocytes Nppa+
sample_2d_r2_s1-cell_7940	9273.59	5418.09	Cardiomyocytes Nppa+
sample_2d_r2_s1-cell_7948	8741.12	5443.66	Endocardial cells
sample_2d_r2_s1-cell_7949	9984.13	5394.87	Cardiomyocytes
sample_2d_r2_s1-cell_7953	8543.09	5396.84	Cardiac fibroblasts
sample_2d_r2_s1-cell_7955	8151.15	5414.55	Endothelial cells
sample_2d_r2_s1-cell_7958	8608.27	5319.29	Cardiomyocytes
sample_2d_r2_s1-cell_7959	8827.65	5418.56	Endocardial cells
sample_2d_r2_s1-cell_7961	10317	5412.57	Cardiac fibroblasts
sample_2d_r2_s1-cell_7962	9563.89	5406.54	Cardiomyocytes
sample_2d_r2_s1-cell_7963	3667.61	5386.97	Endothelial cells
sample_2d_r2_s1-cell_7965	8974.2	5414.95	Endothelial cells
sample_2d_r2_s1-cell_7968	10426.8	5368.54	Cardiomyocytes Nppa+
sample_2d_r2_s1-cell_7969	10487.3	5416.22	Endocardial cells
sample_2d_r2_s1-cell_7970	8424.21	5396.07	Cardiomyocytes Nppa+
sample_2d_r2_s1-cell_7971	9418.8	5376.74	Cardiomyocytes Nppa+
sample_2d_r2_s1-cell_7972	9685.03	5369.51	Myeloid cells
sample_2d_r2_s1-cell_7974	8320.89	5382.58	Myeloid cells
sample_2d_r2_s1-cell_7975	8787.14	5407.28	Endocardial cells
sample_2d_r2_s1-cell_7981	10281.1	5356.3	Cardiac fibroblasts
sample_2d_r2_s1-cell_7987	9362.67	5353.01	Cardiomyocytes
sample_2d_r2_s1-cell_7989	8713.9	5386.77	Cardiac fibroblasts
sample_2d_r2_s1-cell_7992	3574.23	5352.54	Myeloid cells
sample_2d_r2_s1-cell_7995	8864.58	5335.86	Myeloid cells
sample_2d_r2_s1-cell_7997	8777.84	5368.55	Cardiac fibroblasts
sample_2d_r2_s1-cell_7998	9233.65	5365.55	Cardiomyocytes Nppa+
sample_2d_r2_s1-cell_8000	8833.5	5373.23	Cardiac fibroblasts
sample_2d_r2_s1-cell_8001	8974.84	5291.8	Cardiomyocytes
sample_2d_r2_s1-cell_8002	10043.8	5288.8	Cardiomyocytes Nppa+
sample_2d_r2_s1-cell_8003	8547.9	5357.39	Cardiomyocytes Nppa+
sample_2d_r2_s1-cell_8005	10578.6	5350.95	Cardiac fibroblasts
sample_2d_r2_s1-cell_8009	9472.68	5366.55	Cardiomyocytes Nppa+
sample_2d_r2_s1-cell_8010	9806.62	5350.22	Cardiomyocytes
sample_2d_r2_s1-cell_8011	9305.58	5346.51	Myeloid cells
sample_2d_r2_s1-cell_8013	8359.99	5356.5	Endothelial cells
sample_2d_r2_s1-cell_8015	9530.88	5320.51	Cardiomyocytes
sample_2d_r2_s1-cell_8017	9105.17	5320.72	Cardiomyocytes Nppa+
sample_2d_r2_s1-cell_8023	10324.6	5338.95	Cardiomyocytes Nppa+
sample_2d_r2_s1-cell_8025	8763.65	5311.61	Myeloid cells
sample_2d_r2_s1-cell_8026	3762.84	5177.96	Myeloid cells
sample_2d_r2_s1-cell_8029	8256.49	5304.22	Myeloid cells
sample_2d_r2_s1-cell_8032	10644.3	5301.27	Cardiomyocytes Nppa+
sample_2d_r2_s1-cell_8037	9967.66	5306.46	Lymphoid cells
sample_2d_r2_s1-cell_8039	8422.52	5340.77	Myeloid cells
sample_2d_r2_s1-cell_8040	9218.62	5260.49	Cardiomyocytes Nppa+
sample_2d_r2_s1-cell_8041	9453.8	5306.95	Cardiomyocytes
sample_2d_r2_s1-cell_8049	8812.34	5316.66	Myeloid cells
sample_2d_r2_s1-cell_8051	8720.15	5315.45	Myeloid cells
sample_2d_r2_s1-cell_8053	8434.3	5311.64	Cardiomyocytes Nppa+
sample_2d_r2_s1-cell_8056	8442.3	5209.03	Cardiomyocytes Nppa+
sample_2d_r2_s1-cell_8060	10538.5	5301.47	Cardiomyocytes Nppa+
sample_2d_r2_s1-cell_8061	9896.47	5278.74	Lymphoid cells
sample_2d_r2_s1-cell_8063	8370.83	5288.24	Endothelial cells
sample_2d_r2_s1-cell_8065	10451	5296.19	Cardiomyocytes Nppa+
sample_2d_r2_s1-cell_8072	9333.18	5268.01	Cardiomyocytes
sample_2d_r2_s1-cell_8073	2808.8	5187.41	Endothelial cells
sample_2d_r2_s1-cell_8075	10306.4	5238.7	Cardiomyocytes Nppa+
sample_2d_r2_s1-cell_8077	8311.51	5277.88	Myeloid cells
sample_2d_r2_s1-cell_8078	10398.1	5265.98	Cardiomyocytes Nppa+
sample_2d_r2_s1-cell_8079	10250.3	5264.2	Cardiomyocytes Nppa+
sample_2d_r2_s1-cell_8080	9618.47	5242.34	Endothelial cells
sample_2d_r2_s1-cell_8083	10537.2	5242.36	Cardiomyocytes Nppa+
sample_2d_r2_s1-cell_8087	8677.77	5270.6	Cardiac fibroblasts
sample_2d_r2_s1-cell_8090	9090.59	5204.23	Cardiomyocytes
sample_2d_r2_s1-cell_8093	10707.7	5275.57	Cardiomyocytes Nppa+
sample_2d_r2_s1-cell_8094	9937.36	5261.58	Lymphoid cells
sample_2d_r2_s1-cell_8097	8708.88	5234.77	Myeloid cells
sample_2d_r2_s1-cell_8098	9427.82	5251.16	Cardiomyocytes Nppa+
sample_2d_r2_s1-cell_8099	8837.48	5244.09	Endothelial cells
sample_2d_r2_s1-cell_8100	9555.05	5255.5	Endothelial cells
sample_2d_r2_s1-cell_8104	8156.1	5194.23	Cardiomyocytes
sample_2d_r2_s1-cell_8109	10667.2	5220.91	Cardiomyocytes Nppa+
sample_2d_r2_s1-cell_8112	8336.4	5225.39	Endothelial cells
sample_2d_r2_s1-cell_8113	8735.15	5114.65	Cardiomyocytes
sample_2d_r2_s1-cell_8116	8296.02	5217.08	Myeloid cells
sample_2d_r2_s1-cell_8119	9443.67	5185.14	Cardiomyocytes Nppa+
sample_2d_r2_s1-cell_8120	8621.49	5216.67	Myeloid cells
sample_2d_r2_s1-cell_8122	9903.62	5147.22	Cardiomyocytes
sample_2d_r2_s1-cell_8126	10483.1	5184.3	Cardiac fibroblasts
sample_2d_r2_s1-cell_8130	10412.1	5211.84	Endothelial cells
sample_2d_r2_s1-cell_8131	10127.4	5194.3	Lymphoid cells
sample_2d_r2_s1-cell_8134	10376.2	5176.56	Myeloid cells
sample_2d_r2_s1-cell_8135	9657.56	5134.1	Cardiomyocytes Nppa+
[truncated: 1,689 more rows]
