# Supplementary material for: Spatial multiomics of acute myocardial infarction reveals immune cell infiltration through the endocardium
Source: Springer Nature journal article supplement (doi:10.1038/s44161-025-00717-y), 2025-10-03
Supplement: MOESM5 [file 44161_2025_717_MOESM5_ESM.xlsx]

## Sheet: Fig 2A
Predictor	Target	Importance
Endocardial cells	Cardiomyocytes Nppa+	1.69891
Cardiomyocytes Nppa+	Endocardial cells	1.28169
Cardiomyocytes	Endothelial cells	0.652438
Cardiac fibroblasts	Smooth muscle cells	0.58193
Endocardial cells	Smooth muscle cells	0.547489
Endothelial cells	Cardiomyocytes	0.519726
Cardiomyocytes Nppa+	Cardiomyocytes	0.498912
Cardiomyocytes Nppa+	Pericytes	0.497474
Endocardial cells	Pericytes	0.451709
Cardiomyocytes	Cardiac fibroblasts	0.444186
Pericytes	Endocardial cells	0.431648
Smooth muscle cells	Myeloid cells	0.425323
Myeloid cells	Cardiac fibroblasts	0.421585
Cardiomyocytes Nppa+	Smooth muscle cells	0.417433
Cardiac fibroblasts	Cardiomyocytes	0
Cardiac fibroblasts	Endocardial cells	0
Cardiac fibroblasts	Endothelial cells	0
Cardiac fibroblasts	Lymphoid cells	0
Cardiac fibroblasts	Myeloid cells	0
Cardiac fibroblasts	Pericytes	0
Cardiomyocytes	Endocardial cells	0
Cardiomyocytes	Lymphoid cells	0
Cardiomyocytes	Myeloid cells	0
Cardiomyocytes	Pericytes	0
Cardiomyocytes	Smooth muscle cells	0
Cardiomyocytes Nppa+	Cardiac fibroblasts	0
Cardiomyocytes Nppa+	Endothelial cells	0
Cardiomyocytes Nppa+	Lymphoid cells	0
Cardiomyocytes Nppa+	Myeloid cells	0
Endocardial cells	Cardiac fibroblasts	0
Endocardial cells	Cardiomyocytes	0
Endocardial cells	Endothelial cells	0
Endocardial cells	Lymphoid cells	0
Endocardial cells	Myeloid cells	0
Endothelial cells	Cardiac fibroblasts	0
Endothelial cells	Cardiomyocytes Nppa+	0
Endothelial cells	Endocardial cells	0
Endothelial cells	Lymphoid cells	0
Endothelial cells	Myeloid cells	0
Endothelial cells	Pericytes	0
Endothelial cells	Smooth muscle cells	0
Lymphoid cells	Cardiac fibroblasts	0
Lymphoid cells	Cardiomyocytes	0
Lymphoid cells	Endothelial cells	0
Lymphoid cells	Lymphoid cells	0
Lymphoid cells	Myeloid cells	0
Lymphoid cells	Pericytes	0
Lymphoid cells	Smooth muscle cells	0
Myeloid cells	Cardiomyocytes	0
Myeloid cells	Endothelial cells	0
Myeloid cells	Lymphoid cells	0
Myeloid cells	Pericytes	0
Myeloid cells	Smooth muscle cells	0
Pericytes	Cardiac fibroblasts	0
Pericytes	Cardiomyocytes	0
Pericytes	Cardiomyocytes Nppa+	0
Pericytes	Endothelial cells	0
Pericytes	Lymphoid cells	0
Pericytes	Myeloid cells	0
Pericytes	Smooth muscle cells	0
Smooth muscle cells	Cardiac fibroblasts	0
Smooth muscle cells	Cardiomyocytes	0
Smooth muscle cells	Cardiomyocytes Nppa+	0
Smooth muscle cells	Endocardial cells	0
Smooth muscle cells	Endothelial cells	0
Smooth muscle cells	Lymphoid cells	0
Smooth muscle cells	Pericytes	0

## Sheet: Fig 2E
Predictor	Target	Importance
Endocardial cells	Cardiomyocytes Nppa+	1.10933
Endothelial cells	Lymphoid cells	0.826362
Endocardial cells	Myeloid cells	0.704442
Cardiomyocytes	Cardiomyocytes Nppa+	0.634593
Pericytes	Smooth muscle cells	0.567389
Endocardial cells	Smooth muscle cells	0.558817
Cardiomyocytes Nppa+	Cardiomyocytes	0.552258
Cardiomyocytes	Lymphoid cells	0.549659
Cardiomyocytes Nppa+	Cardiac fibroblasts	0.544681
Myeloid cells	Cardiac fibroblasts	0.531817
Cardiomyocytes	Cardiac fibroblasts	0.480981
Cardiomyocytes Nppa+	Myeloid cells	0.479558
Cardiomyocytes	Smooth muscle cells	0.465644
Cardiomyocytes Nppa+	Endothelial cells	0.460446
Smooth muscle cells	Cardiomyocytes	0.45177
Cardiomyocytes Nppa+	Smooth muscle cells	0.443843
Endocardial cells	Cardiomyocytes	0.435293
Endocardial cells	Lymphoid cells	0.421331
Endothelial cells	Cardiomyocytes	0.406929
Cardiac fibroblasts	Endothelial cells	0.405301
Endocardial cells	Pericytes	0.400306
Cardiac fibroblasts	Cardiomyocytes	0
Cardiac fibroblasts	Endocardial cells	0
Cardiac fibroblasts	Myeloid cells	0
Cardiac fibroblasts	Pericytes	0
Cardiac fibroblasts	Smooth muscle cells	0
Cardiomyocytes	Endocardial cells	0
Cardiomyocytes	Endothelial cells	0
Cardiomyocytes	Myeloid cells	0
Cardiomyocytes	Pericytes	0
Cardiomyocytes Nppa+	Endocardial cells	0
Cardiomyocytes Nppa+	Lymphoid cells	0
Cardiomyocytes Nppa+	Pericytes	0
Endocardial cells	Cardiac fibroblasts	0
Endocardial cells	Endothelial cells	0
Endothelial cells	Cardiac fibroblasts	0
Endothelial cells	Endocardial cells	0
Endothelial cells	Myeloid cells	0
Endothelial cells	Pericytes	0
Endothelial cells	Smooth muscle cells	0
Lymphoid cells	Cardiac fibroblasts	0
Lymphoid cells	Cardiomyocytes	0
Lymphoid cells	Cardiomyocytes Nppa+	0
Lymphoid cells	Endocardial cells	0
Lymphoid cells	Endothelial cells	0
Lymphoid cells	Myeloid cells	0
Lymphoid cells	Pericytes	0
Myeloid cells	Cardiomyocytes	0
Myeloid cells	Cardiomyocytes Nppa+	0
Myeloid cells	Endothelial cells	0
Myeloid cells	Lymphoid cells	0
Myeloid cells	Pericytes	0
Myeloid cells	Smooth muscle cells	0
Pericytes	Cardiac fibroblasts	0
Pericytes	Cardiomyocytes	0
Pericytes	Cardiomyocytes Nppa+	0
Pericytes	Endocardial cells	0
Pericytes	Endothelial cells	0
Pericytes	Lymphoid cells	0
Pericytes	Myeloid cells	0
Smooth muscle cells	Cardiac fibroblasts	0
Smooth muscle cells	Cardiomyocytes Nppa+	0
Smooth muscle cells	Endocardial cells	0
Smooth muscle cells	Endothelial cells	0
Smooth muscle cells	Lymphoid cells	0
Smooth muscle cells	Myeloid cells	0
Smooth muscle cells	Pericytes	0

## Sheet: Fig 2I
Predictor	Target	Importance
Cardiomyocytes	Cardiomyocytes Nppa+	0.958358
Endocardial cells	Cardiomyocytes	0.77486
Endocardial cells	Smooth muscle cells	0.672046
Cardiomyocytes Nppa+	Cardiac fibroblasts	0.629854
Cardiomyocytes Nppa+	Cardiomyocytes	0.583375
Endocardial cells	Cardiomyocytes Nppa+	0.543053
Cardiac fibroblasts	Cardiomyocytes	0.541285
Cardiac fibroblasts	Myeloid cells	0.506458
Endocardial cells	Cardiac fibroblasts	0.46654
Cardiomyocytes Nppa+	Myeloid cells	0.455598
Myeloid cells	Cardiomyocytes Nppa+	0.450809
Cardiomyocytes	Cardiac fibroblasts	0.447508
Endocardial cells	Myeloid cells	0.414197
Cardiac fibroblasts	Cardiomyocytes Nppa+	0.400178
Cardiac fibroblasts	Endocardial cells	0
Cardiac fibroblasts	Endothelial cells	0
Cardiac fibroblasts	Lymphoid cells	0
Cardiac fibroblasts	Pericytes	0
Cardiac fibroblasts	Smooth muscle cells	0
Cardiomyocytes	Endocardial cells	0
Cardiomyocytes	Endothelial cells	0
Cardiomyocytes	Lymphoid cells	0
Cardiomyocytes	Myeloid cells	0
Cardiomyocytes	Pericytes	0
Cardiomyocytes	Smooth muscle cells	0
Cardiomyocytes Nppa+	Endocardial cells	0
Cardiomyocytes Nppa+	Endothelial cells	0
Cardiomyocytes Nppa+	Lymphoid cells	0
Cardiomyocytes Nppa+	Pericytes	0
Cardiomyocytes Nppa+	Smooth muscle cells	0
Endocardial cells	Endocardial cells	0
Endocardial cells	Endothelial cells	0
Endocardial cells	Lymphoid cells	0
Endocardial cells	Pericytes	0
Endothelial cells	Cardiac fibroblasts	0
Endothelial cells	Cardiomyocytes	0
Endothelial cells	Cardiomyocytes Nppa+	0
Endothelial cells	Endocardial cells	0
Endothelial cells	Lymphoid cells	0
Endothelial cells	Myeloid cells	0
Endothelial cells	Pericytes	0
Endothelial cells	Smooth muscle cells	0
Lymphoid cells	Cardiac fibroblasts	0
Lymphoid cells	Cardiomyocytes	0
Lymphoid cells	Endocardial cells	0
Lymphoid cells	Endothelial cells	0
Lymphoid cells	Myeloid cells	0
Lymphoid cells	Pericytes	0
Lymphoid cells	Smooth muscle cells	0
Myeloid cells	Cardiac fibroblasts	0
Myeloid cells	Cardiomyocytes	0
Myeloid cells	Endocardial cells	0
Myeloid cells	Endothelial cells	0
Myeloid cells	Lymphoid cells	0
Myeloid cells	Pericytes	0
Myeloid cells	Smooth muscle cells	0
Pericytes	Cardiac fibroblasts	0
Pericytes	Cardiomyocytes	0
Pericytes	Cardiomyocytes Nppa+	0
Pericytes	Endocardial cells	0
Pericytes	Endothelial cells	0
Pericytes	Lymphoid cells	0
Pericytes	Myeloid cells	0
Pericytes	Smooth muscle cells	0
Smooth muscle cells	Cardiac fibroblasts	0
Smooth muscle cells	Cardiomyocytes	0
Smooth muscle cells	Cardiomyocytes Nppa+	0
Smooth muscle cells	Endocardial cells	0
Smooth muscle cells	Endothelial cells	0
Smooth muscle cells	Lymphoid cells	0
Smooth muscle cells	Myeloid cells	0
Smooth muscle cells	Pericytes	0

## Sheet: Fig 2N
Timepoint	Distance (um)
2d	19.1779
2d	19.5143
4d	22.1872
4d	11.7606
control	48.6621
control	54.1513

## Sheet: Fig 2O
Timepoint	Distance (um)
2d	24.5207
2d	28.7771
4d	16.8049
4d	19.0291
control	43.3316
control	38.5758
