# Supplementary material for: Spatial multiomics of acute myocardial infarction reveals immune cell infiltration through the endocardium
Source: Springer Nature journal article supplement (doi:10.1038/s44161-025-00717-y), 2025-10-03
Supplement: MOESM6 [file 44161_2025_717_MOESM6_ESM.xlsx]

## Sheet: Fig 3C
Cell type	Ankrd1+	Ccr2+	Cd31+	Cd45+	Cd68+	Mpo+	Pdgfra+	Tnnt2+	Trem2+	aSMA+
Fibroblasts	-0.421096	-0.377595	-0.30593	-0.32556	-0.452446	-0.371473	2.78881	0.0614605	-0.313921	-0.301066
Neutrophils	0.166783	-0.38842	-0.660775	-0.287855	-0.520724	2.80483	-0.555035	-0.760477	-0.352803	-0.3278
Mono / Macros Ccr2+	-0.0670291	2.78481	-0.333059	-0.252891	-0.267905	0.137496	-0.27388	-0.577904	-0.109084	-0.309438
Smooth muscle cells	-0.480205	-0.441244	0.434821	-0.332719	-0.515003	-0.418091	-0.130389	-0.549313	-0.342839	2.84591
Macrophages Trem2+	-0.381805	0.178131	-0.440108	-0.315045	1.96763	-0.386578	0.105295	-0.705201	2.83811	-0.31965
Cardiomyocytes Ankrd1+	2.78248	-0.37295	-0.367918	-0.31917	-0.510352	-0.295032	-0.484445	-0.253104	-0.350788	-0.32764
Endothelial cells	-0.425641	-0.416739	2.7232	-0.330086	-0.524226	-0.364734	-0.213906	-0.124481	-0.349115	-0.303078
Other Leukocytes	-0.257012	-0.0625564	-0.269669	2.84501	-0.439307	-0.244624	-0.368823	-0.687145	-0.31213	-0.310763
Cardiomyocytes	-0.410279	-0.460613	-0.236041	-0.34081	-0.550054	-0.414405	-0.530092	2.16342	-0.361328	-0.32828
Macrophages Trem2-	-0.506198	-0.442826	-0.544516	-0.340873	1.81238	-0.447387	-0.337531	1.43274	-0.346098	-0.31819

## Sheet: Fig 3E
Sample	Timepoint	Distance (um)
sample_1d.r1	1d	22.8227
sample_1d.r2	1d	26.9088
sample_2d.r1	2d	109.355
sample_2d.r2	2d	41.4644
sample_4h.r1	4h	137.526
sample_4h.r2	4h	117.26
sample_control.r1	control	319.032
sample_control.r2	control	162.607
sample_control.r3	control	321.272

## Sheet: Fig 3G
Timepoint	FOV	Region	Cell type	Total cell count	Count / mm2
24h	24h_83	Border zone	Mono / Macros Ccr2+	10052	411.678
24h	24h_83	Endocardium	Mono / Macros Ccr2+	2948	1583.06
24h	24h_83	Epicardium	Mono / Macros Ccr2+	1717	504.361
24h	24h_83	Infarct core	Mono / Macros Ccr2+	10366	207.119
24h	24h_86	Border zone	Mono / Macros Ccr2+	10746	213.429
24h	24h_86	Endocardium	Mono / Macros Ccr2+	1319	744.665
24h	24h_86	Epicardium	Mono / Macros Ccr2+	1071	236.065
24h	24h_86	Infarct core	Mono / Macros Ccr2+	6977	99.3613
48h	48h_76	Border zone	Mono / Macros Ccr2+	8990	710.371
48h	48h_76	Endocardium	Mono / Macros Ccr2+	1119	839.577
48h	48h_76	Epicardium	Mono / Macros Ccr2+	1173	865.582
48h	48h_76	Infarct core	Mono / Macros Ccr2+	7595	645.828
48h	48h_79	Border zone	Mono / Macros Ccr2+	9985	903.637
48h	48h_79	Endocardium	Mono / Macros Ccr2+	1600	776.917
48h	48h_79	Epicardium	Mono / Macros Ccr2+	965	731.61
48h	48h_79	Infarct core	Mono / Macros Ccr2+	9142	708.106
4h	4h_96	Border zone	Mono / Macros Ccr2+	9963	51.4834
4h	4h_96	Endocardium	Mono / Macros Ccr2+	1906	89.6403
4h	4h_96	Epicardium	Mono / Macros Ccr2+	842	19.1928
4h	4h_96	Infarct core	Mono / Macros Ccr2+	9054	11.8422
4h	4h_97	Border zone	Mono / Macros Ccr2+	10792	74.2416
4h	4h_97	Endocardium	Mono / Macros Ccr2+	1538	134.231
4h	4h_97	Epicardium	Mono / Macros Ccr2+	1771	62.9064
4h	4h_97	Infarct core	Mono / Macros Ccr2+	12055	48.2672
