# Supplementary material for: Spatial multiomics of acute myocardial infarction reveals immune cell infiltration through the endocardium
Source: Springer Nature journal article supplement (doi:10.1038/s44161-025-00717-y), 2025-10-03
Supplement: MOESM7 [file 44161_2025_717_MOESM7_ESM.xlsx]

## Sheet: Fig 5B
Sample	Group	PC1	PC2
control_r1	control	-35.8131	7.91921
control_r2	control	-28.674	14.1035
control_r3	control	-38.2578	6.84973
MI_IZ_r1	MI_IZ	16.7955	-44.9672
MI_IZ_r2	MI_IZ	31.0833	-10.4977
MI_IZ_r3	MI_IZ	35.6546	3.46656
MI_IZ_r4	MI_IZ	71.7258	26.4939
MI_remote_r1	MI_remote	-15.7983	5.19886
MI_remote_r2	MI_remote	-1.63253	-6.46135
MI_remote_r3	MI_remote	-24.0489	-4.30866
MI_remote_r4	MI_remote	-11.0344	2.20306

## Sheet: Fig 5C
logFC	AveExpr	t	P.Value	adj.P.Val	B	gene	protein_ids	pval	analysis	label_protein
2.30175	12.8322	12.2469	5.60572e-08	0.00019407	8.75357	Lcp1	Q61233	5.60572e-08	MI_IZ_vs_MI_remote
3.01551	12.3035	11.1379	1.55291e-07	0.000238241	7.83557	Coro1a	O89053	1.55291e-07	MI_IZ_vs_MI_remote	Coro1a
2.7644	13.0683	10.5531	2.75264e-07	0.000238241	7.30918	Hmgb2	P30681	2.75264e-07	MI_IZ_vs_MI_remote
1.76923	12.5637	10.6744	2.43922e-07	0.000238241	7.42094	Lcp1;Pls3	Q99K51;Q61233	2.43922e-07	MI_IZ_vs_MI_remote
1.12059	12.3129	9.47151	8.53041e-07	0.000590645	6.24925	Fbln1	Q08879	8.53041e-07	MI_IZ_vs_MI_remote
-2.00521	14.4282	-8.27235	3.38912e-06	0.000707071	4.92624	Myh13;Myh4	B1AR69;Q5SX39	3.38912e-06	MI_IZ_vs_MI_remote
2.98036	16.8114	8.1193	4.08475e-06	0.000707071	4.74503	Fga	E9PV24	4.08475e-06	MI_IZ_vs_MI_remote
2.61659	12.5211	11.1417	2.15458e-06	0.000707071	5.26624	Chil3	O35744	2.15458e-06	MI_IZ_vs_MI_remote
2.34977	12.579	8.23013	3.56731e-06	0.000707071	4.87655	S100a4	P07091	3.56731e-06	MI_IZ_vs_MI_remote
2.14331	12.7778	11.7208	3.99818e-06	0.000707071	4.68848	Serpine1	P22777	3.99818e-06	MI_IZ_vs_MI_remote
1.25879	13.1397	8.56867	2.37796e-06	0.000707071	5.26885	Capg	P24452	2.37796e-06	MI_IZ_vs_MI_remote
4.33233	14.5872	10.4878	3.50482e-06	0.000707071	4.9824	S100a9	P31725	3.50482e-06	MI_IZ_vs_MI_remote
1.22102	18.4587	8.1766	3.80786e-06	0.000707071	4.81322	Actb;Actg1	P60710;P63260	3.80786e-06	MI_IZ_vs_MI_remote
1.74864	12.1883	8.48984	2.61066e-06	0.000707071	5.17875	G6pdx	Q00612	2.61066e-06	MI_IZ_vs_MI_remote
-1.3041	11.8748	-8.80452	1.80529e-06	0.000707071	5.53398	Reln	Q60841	1.80529e-06	MI_IZ_vs_MI_remote
-1.99097	16.411	-8.39567	2.92118e-06	0.000707071	5.07013	Myh7	Q91Z83	2.92118e-06	MI_IZ_vs_MI_remote
-2.30976	13.8636	-8.36327	3.03697e-06	0.000707071	5.03251	Myh1;Myh2;Myh4;Myh7;Myh8	Q91Z83;G3UW82;Q5SX39;P13542;Q5SX40	3.03697e-06	MI_IZ_vs_MI_remote
-2.52759	14.4888	-8.9187	1.58303e-06	0.000707071	5.66	Myh4;Myh7	Q91Z83;Q5SX39	1.58303e-06	MI_IZ_vs_MI_remote
1.19345	11.8166	8.4798	2.64202e-06	0.000707071	5.16722	Cyria;Cyrib	Q921M7;Q8BHZ0	2.64202e-06	MI_IZ_vs_MI_remote
1.41865	12.618	8.77246	1.87356e-06	0.000707071	5.49833	Arpc5	Q9CPW4	1.87356e-06	MI_IZ_vs_MI_remote
3.51909	12.8766	8.45077	5.02595e-06	0.000799914	4.59975	Ltf	P08071	5.02595e-06	MI_IZ_vs_MI_remote
1.82572	14.3219	7.94264	5.08322e-06	0.000799914	4.53218	Anxa1	P10107	5.08322e-06	MI_IZ_vs_MI_remote
1.44285	12.6595	7.88509	5.4627e-06	0.000822255	4.46197	Arpc1b	Q9WV32	5.4627e-06	MI_IZ_vs_MI_remote
1.95743	16.2403	7.53312	8.555e-06	0.00102129	4.02312	Fn1	P11276	8.555e-06	MI_IZ_vs_MI_remote
-0.975298	12.6789	-7.6241	7.60784e-06	0.00102129	4.13814	Thbd	P15306	7.60784e-06	MI_IZ_vs_MI_remote	Thbd
3.2983	16.4183	7.6427	7.4284e-06	0.00102129	4.16152	Fgb	Q8K0E8	7.4284e-06	MI_IZ_vs_MI_remote
3.13565	16.4711	7.56476	8.21208e-06	0.00102129	4.06324	Fgg	Q8VCM7	8.21208e-06	MI_IZ_vs_MI_remote
-2.45634	15.0086	-7.53715	8.51054e-06	0.00102129	4.02823	Myh2;Myh7	Q91Z83;G3UW82	8.51054e-06	MI_IZ_vs_MI_remote
-1.78281	14.4922	-7.55116	8.35767e-06	0.00102129	4.04601	Myh3;Myh7	Q91Z83;P13541	8.35767e-06	MI_IZ_vs_MI_remote
1.5407	14.3068	7.33114	1.11398e-05	0.00128553	3.76377	Tkt	P40142	1.11398e-05	MI_IZ_vs_MI_remote
1.06694	15.7267	7.24084	1.25554e-05	0.00140216	3.64601	Msn	P26041	1.25554e-05	MI_IZ_vs_MI_remote
1.231	12.2922	7.18659	1.34974e-05	0.00143221	3.57472	Cap1	P40124	1.34974e-05	MI_IZ_vs_MI_remote
0.886004	15.4912	7.17808	1.3652e-05	0.00143221	3.5635	Flna;Flnb;Flnc	Q8BTM8;Q8VHX6;Q80X90	1.3652e-05	MI_IZ_vs_MI_remote
2.48523	14.6336	7.96739	1.58439e-05	0.00154112	3.54887	Thbs1	P35441	1.58439e-05	MI_IZ_vs_MI_remote	Thbs1
0.828585	14.5422	7.10038	1.51535e-05	0.00154112	3.46057	Npm1	Q61937	1.51535e-05	MI_IZ_vs_MI_remote
1.56287	14.0449	7.05894	1.60255e-05	0.00154112	3.40535	F13a1	Q8BH61	1.60255e-05	MI_IZ_vs_MI_remote
-0.699197	14.2156	-6.9886	1.7631e-05	0.00163318	3.31103	Tns1	E9Q0S6	1.7631e-05	MI_IZ_vs_MI_remote
2.08903	11.2912	9.4994	1.79263e-05	0.00163318	3.45435	Gda	Q9R111	1.79263e-05	MI_IZ_vs_MI_remote
1.1745	13.2836	6.94162	1.87985e-05	0.0016612	3.24764	Rbm3	O89086	1.87985e-05	MI_IZ_vs_MI_remote
0.888151	14.2979	6.91689	1.9446e-05	0.0016612	3.21415	Actr2	P61161	1.9446e-05	MI_IZ_vs_MI_remote
1.25777	11.007	6.90841	1.96734e-05	0.0016612	3.20265	Glipr2	Q9CYL5	1.96734e-05	MI_IZ_vs_MI_remote
0.910099	14.0323	6.74111	2.47939e-05	0.00204372	2.97357	Hnrnpf	Q9Z2X1	2.47939e-05	MI_IZ_vs_MI_remote
0.793098	15.3685	6.65849	2.78314e-05	0.00218982	2.85896	Ncl	P09405	2.78314e-05	MI_IZ_vs_MI_remote
-1.09655	12.6391	-7.45099	2.77386e-05	0.00218982	2.99288	Cygb	Q9CX80	2.77386e-05	MI_IZ_vs_MI_remote
-1.18379	11.6207	-7.40847	2.90848e-05	0.00223759	2.94831	Spon1	Q8VCC9	2.90848e-05	MI_IZ_vs_MI_remote
1.877	11.9851	7.94065	3.10662e-05	0.00233807	2.96439	Cd44	P15379	3.10662e-05	MI_IZ_vs_MI_remote
0.896784	13.0718	6.43478	3.82305e-05	0.00281604	2.54359	Arpc2	Q9CVB6	3.82305e-05	MI_IZ_vs_MI_remote
1.16857	14.6375	6.39682	4.03726e-05	0.00285245	2.48936	Tpm3-rs7	D3Z2H9	4.03726e-05	MI_IZ_vs_MI_remote
1.73632	11.7168	6.40505	3.98974e-05	0.00285245	2.50114	Lcp1;Pls1;Pls3	Q3V0K9;Q99K51;Q61233	3.98974e-05	MI_IZ_vs_MI_remote
1.49065	13.0951	6.33101	4.43961e-05	0.0029035	2.39481	Hspa1a;Hspa1b;Hspa1l	Q61696;P17879;P16627	4.43961e-05	MI_IZ_vs_MI_remote
0.958837	12.5952	6.34555	4.3472e-05	0.0029035	2.41575	Mybbp1a	Q7TPV4	4.3472e-05	MI_IZ_vs_MI_remote
-0.976842	14.2627	-6.33017	4.44498e-05	0.0029035	2.39361	Art3	Q8R2G4	4.44498e-05	MI_IZ_vs_MI_remote
1.18094	11.6521	6.68014	4.19882e-05	0.0029035	2.51635	Arpc1a;Arpc1b	Q9WV32;Q9R0Q6	4.19882e-05	MI_IZ_vs_MI_remote
1.14898	14.7272	6.27214	4.83578e-05	0.00294047	2.30969	Cfl1	P18760	4.83578e-05	MI_IZ_vs_MI_remote
2.52109	12.6537	8.23816	4.84132e-05	0.00294047	2.57348	Mmp9	P41245	4.84132e-05	MI_IZ_vs_MI_remote
1.50525	15.1189	6.2867	4.73437e-05	0.00294047	2.3308	Myh9	Q8VDD5	4.73437e-05	MI_IZ_vs_MI_remote
1.41849	10.8627	6.99226	4.67476e-05	0.00294047	2.4839	Ddx39a	Q8VDW0	4.67476e-05	MI_IZ_vs_MI_remote
-1.25271	10.9658	-6.24537	5.0282e-05	0.00300132	2.27081	Mff	Q6PCP5	5.0282e-05	MI_IZ_vs_MI_remote
1.38003	12.4489	6.131	5.94697e-05	0.00307351	2.10351	Myh11;Myh9	O08638;Q8VDD5	5.94697e-05	MI_IZ_vs_MI_remote
0.819734	14.374	6.13463	5.91519e-05	0.00307351	2.10885	Crip1	P63254	5.91519e-05	MI_IZ_vs_MI_remote
1.26751	14.7709	6.12082	6.03694e-05	0.00307351	2.08853	Myl6	Q60605	6.03694e-05	MI_IZ_vs_MI_remote
2.18337	10.9971	6.78681	5.95261e-05	0.00307351	2.26057	Arhgdib	Q61599	5.95261e-05	MI_IZ_vs_MI_remote
1.14091	15.0356	6.14056	5.86368e-05	0.00307351	2.11758	Actn1	Q7TPR4	5.86368e-05	MI_IZ_vs_MI_remote
-0.743241	13.3352	-6.16065	5.69275e-05	0.00307351	2.14708	Mrpl38	Q8K2M0	5.69275e-05	MI_IZ_vs_MI_remote
0.91446	14.2937	6.20499	5.334e-05	0.00307351	2.21197	Actr3	Q99JY9	5.334e-05	MI_IZ_vs_MI_remote
1.31125	12.7945	6.19463	5.41562e-05	0.00307351	2.19684	Klhl40	Q9D783	5.41562e-05	MI_IZ_vs_MI_remote
0.949716	13.5042	6.15878	5.70851e-05	0.00307351	2.14432	Ddx21	Q9JIK5	5.70851e-05	MI_IZ_vs_MI_remote
1.36461	13.4752	6.79708	5.88046e-05	0.00307351	2.2558	Prg4	Q9JM99	5.88046e-05	MI_IZ_vs_MI_remote
1.06582	13.2839	6.09842	6.24015e-05	0.00313093	2.05551	Flna;Flnc	Q8BTM8;Q8VHX6	6.24015e-05	MI_IZ_vs_MI_remote
1.45388	16.2297	6.06825	6.52551e-05	0.00322733	2.01089	Actb;Actbl2;Actg1	Q8BFZ3;P60710;P63260	6.52551e-05	MI_IZ_vs_MI_remote
1.19756	12.8889	6.02181	6.99201e-05	0.00340935	1.94197	Lmcd1	Q8VEE1	6.99201e-05	MI_IZ_vs_MI_remote
0.899112	12.0758	5.96581	7.60217e-05	0.00365538	1.85842	Cbx3	P23198	7.60217e-05	MI_IZ_vs_MI_remote
1.44114	13.5463	6.20394	7.92571e-05	0.00375874	1.88276	Hspa1a;Hspa1b;Hspa1l;Hspa2	Q61696;P17156;P17879;P16627	7.92571e-05	MI_IZ_vs_MI_remote
1.08091	12.7789	5.92314	8.10501e-05	0.00379183	1.79444	Samhd1	Q60710	8.10501e-05	MI_IZ_vs_MI_remote
1.0061	11.2342	6.49727	8.44085e-05	0.0038963	1.91663	Ifi204;Ifi207;Mnda	P0DOV1;E9Q3L4;P0DOV2	8.44085e-05	MI_IZ_vs_MI_remote
0.628442	13.1138	5.84217	9.15874e-05	0.00414502	1.67229	Pa2g4	P50580	9.15874e-05	MI_IZ_vs_MI_remote
1.07264	14.4376	5.83783	9.21914e-05	0.00414502	1.66572	Myl12b	Q3THE2	9.21914e-05	MI_IZ_vs_MI_remote
1.29086	15.271	5.82083	9.46005e-05	0.00419881	1.63993	Flna	Q8BTM8	9.46005e-05	MI_IZ_vs_MI_remote
1.06239	12.8367	5.76684	0.000102702	0.00433601	1.55777	Apob	E9Q414	0.000102702	MI_IZ_vs_MI_remote
-0.751807	12.7132	-5.78362	0.000100108	0.00433601	1.58335	Nt5dc3	Q3UHB1	0.000100108	MI_IZ_vs_MI_remote
1.17928	12.4249	6.77667	0.000102047	0.00433601	1.81606	Cemip;Cemip2	Q8BI06;Q5FWI3	0.000102047	MI_IZ_vs_MI_remote
-0.992692	12.0331	-6.01786	0.000102423	0.00433601	1.65503	Stbd1	Q8C7E7	0.000102423	MI_IZ_vs_MI_remote
3.91293	15.5966	6.5715	0.000127794	0.00453367	1.58644	Ngp	O08692	0.000127794	MI_IZ_vs_MI_remote
-0.72734	12.988	-5.96547	0.000110186	0.00453367	1.58259	Pdk4	O70571	0.000110186	MI_IZ_vs_MI_remote
3.49666	12.0829	8.00375	0.000126656	0.00453367	1.57918	Lyz2	P08905	0.000126656	MI_IZ_vs_MI_remote
-1.87944	12.3825	-5.64267	0.000124258	0.00453367	1.36712	Myl1;Myl4	P09541;P05977	0.000124258	MI_IZ_vs_MI_remote
2.9265	13.3786	6.57031	0.000127962	0.00453367	1.58515	Itgb2	P11835	0.000127962	MI_IZ_vs_MI_remote
1.68622	12.5733	6.1609	0.000128336	0.00453367	1.47523	Lsp1	P19973	0.000128336	MI_IZ_vs_MI_remote
0.744204	12.9749	5.70278	0.000113279	0.00453367	1.4597	Erh	P84089	0.000113279	MI_IZ_vs_MI_remote
2.46905	12.6043	7.22824	0.000117915	0.00453367	1.74904	Rac2	Q05144	0.000117915	MI_IZ_vs_MI_remote
-0.87557	14.9199	-5.68082	0.000117166	0.00453367	1.42594	Slmap	Q3URD3	0.000117166	MI_IZ_vs_MI_remote
1.61788	15.5467	5.67803	0.00011767	0.00453367	1.42165	Ecm1	Q61508	0.00011767	MI_IZ_vs_MI_remote
1.49346	13.8851	5.72639	0.000109253	0.00453367	1.49591	Hspa1a;Hspa1b	Q61696;P17879	0.000109253	MI_IZ_vs_MI_remote
0.729115	12.7555	5.69701	0.000114287	0.00453367	1.45084	Cpne3	Q8BT60	0.000114287	MI_IZ_vs_MI_remote
-0.993719	12.6756	-5.9238	0.000116809	0.00453367	1.52468	Dhrs7c	Q8CHS7	0.000116809	MI_IZ_vs_MI_remote
1.03635	12.5386	5.65071	0.000122727	0.00453367	1.37953	Pgd	Q9DCD0	0.000122727	MI_IZ_vs_MI_remote
0.943624	12.8989	5.66719	0.00011965	0.00453367	1.40494	Set	Q9EQU5	0.00011965	MI_IZ_vs_MI_remote
-0.635581	12.4441	-5.62564	0.00012757	0.00453367	1.34079	Bves	Q9ES83	0.00012757	MI_IZ_vs_MI_remote
1.10041	13.3543	5.58591	0.000135664	0.00474413	1.27921	Itih2	Q61703	0.000135664	MI_IZ_vs_MI_remote
1.13208	13.774	5.53953	0.000145806	0.00494882	1.20701	Tpm3;Tpm3-rs7	P21107;D3Z2H9	0.000145806	MI_IZ_vs_MI_remote
1.61492	13.0851	5.5455	0.000144456	0.00494882	1.21633	Serpinf2	Q61247	0.000144456	MI_IZ_vs_MI_remote
1.27496	14.7989	5.55004	0.000143439	0.00494882	1.2234	Myh10;Myh9	Q61879;Q8VDD5	0.000143439	MI_IZ_vs_MI_remote
0.739283	17.2206	5.50268	0.000154436	0.00519086	1.14941	Anxa2	P07356	0.000154436	MI_IZ_vs_MI_remote
1.28958	15.1151	5.46182	0.000164638	0.00548053	1.08533	Pzp	Q61838	0.000164638	MI_IZ_vs_MI_remote
1.39408	13.498	5.43346	0.000172139	0.00567567	1.04069	Vwf	Q8CIZ8	0.000172139	MI_IZ_vs_MI_remote	vWF
2.08797	12.0001	5.40655	0.00017959	0.00581066	0.998232	Ugt1a1;Ugt1a2;Ugt1a5;Ugt1a6;Ugt1a6b;Ugt1a7;Ugt1a8;Ugt1a9	P70691;B2RT14;Q62452;Q6ZQM8;Q63886;Q64435;K9J7B2;D3Z748	0.00017959	MI_IZ_vs_MI_remote
1.05933	12.0723	5.41214	0.000178015	0.00581066	1.00706	Mogs	Q80UM7	0.000178015	MI_IZ_vs_MI_remote
1.60434	12.1455	6.20642	0.000193103	0.00619004	1.1769	Ptpn6	P29351	0.000193103	MI_IZ_vs_MI_remote
0.762803	12.4315	5.34503	0.000197931	0.00628658	0.900772	Rsl1d1	Q8BVY0	0.000197931	MI_IZ_vs_MI_remote
0.732824	14.2896	5.32643	0.00020386	0.00630146	0.871188	Ezr;Msn;Rdx	P26040;P26043;P26041	0.00020386	MI_IZ_vs_MI_remote
0.897237	12.1685	5.32683	0.00020373	0.00630146	0.871827	S100a11	P50543	0.00020373	MI_IZ_vs_MI_remote
-1.11712	17.0219	-5.32831	0.000203253	0.00630146	0.874178	Ldb3	Q9JKS4	0.000203253	MI_IZ_vs_MI_remote
1.14717	10.9965	5.51343	0.000210232	0.00641754	0.904141	Phgdh	Q61753	0.000210232	MI_IZ_vs_MI_remote
-0.653946	12.4704	-5.30381	0.000211323	0.00641754	0.835147	Dtna	Q9D2N4	0.000211323	MI_IZ_vs_MI_remote
0.751405	11.4443	5.29074	0.000215767	0.00649551	0.814284	Srsf9	Q9D0B0	0.000215767	MI_IZ_vs_MI_remote
1.03336	12.3089	5.26041	0.000226462	0.00674485	0.76578	C4b	P01029	0.000226462	MI_IZ_vs_MI_remote
0.904046	13.9889	5.21861	0.000242125	0.00674485	0.69872	B2m	P01887	0.000242125	MI_IZ_vs_MI_remote
1.12904	12.1908	5.22766	0.000238641	0.00674485	0.713254	H2-K1;H2-Q4	P01901;Q8HWB2	0.000238641	MI_IZ_vs_MI_remote
1.22618	12.1255	5.45799	0.000228018	0.00674485	0.822442	Lyz1;Lyz2	P08905;P17897	0.000228018	MI_IZ_vs_MI_remote
0.930794	19.0869	5.215	0.000243532	0.00674485	0.692913	H2bc12;H2bc14;H2bc15;H2bc3;H2bc8;H2bc9;Hist1h2bp;Hist2h2bb	P10854;Q64525;Q64475;Q6ZWY9;Q64478;Q8CGP2;P10853;Q8CGP1	0.000243532	MI_IZ_vs_MI_remote
-0.761591	16.8842	-5.21802	0.000242356	0.00674485	0.697765	Aldh2	P47738	0.000242356	MI_IZ_vs_MI_remote
-1.06249	12.7622	-5.23507	0.000235826	0.00674485	0.725153	Synpo2;Synpo2l	Q91YE8;Q8BWB1	0.000235826	MI_IZ_vs_MI_remote
0.707233	13.0397	5.22908	0.000238099	0.00674485	0.715536	Hnrnpab	Q99020	0.000238099	MI_IZ_vs_MI_remote
-0.644411	14.324	-5.22654	0.000239068	0.00674485	0.711464	Pdk2	Q9JK42	0.000239068	MI_IZ_vs_MI_remote
-0.770264	12.2862	-5.24149	0.000233416	0.00674485	0.735451	Map1a	Q9QYR6	0.000233416	MI_IZ_vs_MI_remote
2.38349	13.0495	5.95557	0.000258916	0.00708913	0.884344	Fcer1g	P20491	0.000258916	MI_IZ_vs_MI_remote
0.860886	14.4296	5.17413	0.000260058	0.00708913	0.627072	Arpc3	Q9JM76	0.000260058	MI_IZ_vs_MI_remote
1.25466	11.6255	5.59956	0.000266977	0.00717097	0.772032	Fmnl1;Fmnl2	A2APV2;Q9JL26	0.000266977	MI_IZ_vs_MI_remote
1.20006	13.9691	5.15277	0.000269161	0.00717097	0.592565	Lbr	Q3U9G9	0.000269161	MI_IZ_vs_MI_remote
-0.878127	13.2454	-5.15251	0.000269274	0.00717097	0.592147	Popdc2	Q9ES82	0.000269274	MI_IZ_vs_MI_remote
1.28495	11.5396	5.12433	0.000281806	0.00729288	0.546521	Myh11;Myh14;Myh9	O08638;Q6URW6;Q8VDD5	0.000281806	MI_IZ_vs_MI_remote
2.66763	12.4607	7.00707	0.000279928	0.00729288	0.921128	Cd74	P04441	0.000279928	MI_IZ_vs_MI_remote
1.11246	13.04	5.10058	0.000292847	0.00729288	0.507975	Icam1	P13597	0.000292847	MI_IZ_vs_MI_remote
-0.705837	16.3339	-5.09623	0.000294917	0.00729288	0.500911	Hk1	P17710	0.000294917	MI_IZ_vs_MI_remote
0.901611	12.3614	5.11786	0.000284772	0.00729288	0.536023	Pabpc1	P29341	0.000284772	MI_IZ_vs_MI_remote
2.99201	14.1308	6.30952	0.000289391	0.00729288	0.890241	Elane	Q3UP87	0.000289391	MI_IZ_vs_MI_remote
2.31179	13.6929	5.56752	0.000278738	0.00729288	0.728923	Sprr1a	Q62266	0.000278738	MI_IZ_vs_MI_remote
-0.752827	12.4044	-5.10394	0.000291259	0.00729288	0.51343	Mapre3	Q6PER3	0.000291259	MI_IZ_vs_MI_remote
-1.04371	13.5591	-5.10751	0.00028958	0.00729288	0.519229	Col6a5;Col6a6	Q8C6K9;A6H584	0.00028958	MI_IZ_vs_MI_remote
1.19409	14.6689	5.10882	0.000288966	0.00729288	0.521357	Myl6;Myl6b	Q8CI43;Q60605	0.000288966	MI_IZ_vs_MI_remote
-0.726129	15.1175	-5.06578	0.000309851	0.00760783	0.451364	Plin4	O88492	0.000309851	MI_IZ_vs_MI_remote
-1.58055	11.3361	-5.7939	0.000314136	0.00765872	0.737083	Cyp4b1	Q64462	0.000314136	MI_IZ_vs_MI_remote
0.751979	12.8672	5.04904	0.000318399	0.00770837	0.424067	Vcam1	P29533	0.000318399	MI_IZ_vs_MI_remote
0.904296	12.4185	5.02916	0.000328879	0.0079068	0.391582	Vasp	P70460	0.000328879	MI_IZ_vs_MI_remote
1.85145	11.5566	6.7792	0.00033985	0.00811421	0.754308	Chil3;Chil4	O35744;Q91Z98	0.00033985	MI_IZ_vs_MI_remote
-0.682463	14.5595	-4.99003	0.000350571	0.00821801	0.327508	Hk1;Hk2	P17710;O08528	0.000350571	MI_IZ_vs_MI_remote
1.57007	16.882	4.98802	0.000351722	0.00821801	0.32422	H1-5	P43276	0.000351722	MI_IZ_vs_MI_remote
1.08609	13.9118	4.97827	0.000357379	0.00821801	0.308215	Myh10;Myh11;Myh14;Myh9	Q61879;O08638;Q6URW6;Q8VDD5	0.000357379	MI_IZ_vs_MI_remote
-0.802463	12.425	-4.98005	0.00035634	0.00821801	0.311136	Fhod3	Q76LL6	0.00035634	MI_IZ_vs_MI_remote
-0.58922	11.6844	-4.97646	0.00035844	0.00821801	0.305242	Gk;Gykl1	Q8C635;Q64516	0.00035844	MI_IZ_vs_MI_remote
-0.591796	13.0974	-4.99602	0.000347155	0.00821801	0.337333	Ghitm	Q91VC9	0.000347155	MI_IZ_vs_MI_remote
-0.740181	12.8984	-4.91858	0.000394155	0.00858217	0.209959	Wfs1	P56695	0.000394155	MI_IZ_vs_MI_remote
0.839445	12.5525	4.93059	0.00038645	0.00858217	0.229763	Actn1;Actn3;Actn4	P57780;Q7TPR4;O88990	0.00038645	MI_IZ_vs_MI_remote
-0.934819	18.1958	-4.92164	0.000392174	0.00858217	0.215014	Tpm1;Tpm2;Tpm3;Tpm3-rs7;Tpm4	P58774;P58771;P21107;D3Z2H9;Q6IRU2	0.000392174	MI_IZ_vs_MI_remote
0.629127	11.6224	4.9257	0.000389567	0.00858217	0.221704	Dnaja1	P63037	0.000389567	MI_IZ_vs_MI_remote
0.542477	14.7374	4.91915	0.000393787	0.00858217	0.210896	Rpl35	Q6ZWV7	0.000393787	MI_IZ_vs_MI_remote
0.804864	14.4707	4.92435	0.000390433	0.00858217	0.219478	H2ac1;H2ac11;H2ac12;H2ac13;H2ac15;H2ac20;H2ac21;H2ac4;H2ac6;H2ac7;H2ac8;H2aj;H2aw;H2ax;Hist1h2af;Hist1h2an;Hist1h2ao;Hist1h2ap;Hist2h2aa2	Q8CGP6;C0HKE3;Q8CGP7;Q64523;C0HKE6;Q8CGP5;C0HKE8;C0HKE1;Q8R1M2;C0HKE9;C0HKE5;Q64522;Q8BFU2;C0HKE2;C0HKE7;P27661;Q8CGP4;Q6GSS7;C0HKE4	0.000390433	MI_IZ_vs_MI_remote
0.829899	12.1106	5.1196	0.000377872	0.00858217	0.313766	Bzw1	Q9CQC6	0.000377872	MI_IZ_vs_MI_remote
1.03356	12.7133	4.93451	0.000383964	0.00858217	0.236239	Clic1	Q9Z1Q5	0.000383964	MI_IZ_vs_MI_remote
-1.18891	12.507	-4.9009	0.000405795	0.00858585	0.180764	Myl1	P05977	0.000405795	MI_IZ_vs_MI_remote
3.03995	13.156	5.29701	0.000403421	0.00858585	0.358647	Mpo	P11247	0.000403421	MI_IZ_vs_MI_remote
3.16681	13.5148	5.9968	0.000401471	0.00858585	0.571498	Camp	P51437	0.000401471	MI_IZ_vs_MI_remote
-0.890581	15.0446	-4.89951	0.000406724	0.00858585	0.178469	Sorbs2	Q3UTJ2	0.000406724	MI_IZ_vs_MI_remote
0.973401	13.0507	4.91037	0.000399517	0.00858585	0.196404	Taldo1	Q93092	0.000399517	MI_IZ_vs_MI_remote
1.45304	13.8842	4.88271	0.000418148	0.00866844	0.150681	Ighm	P01872	0.000418148	MI_IZ_vs_MI_remote
0.637966	14.7804	4.88599	0.00041589	0.00866844	0.156112	Hnrnpa1	P49312	0.00041589	MI_IZ_vs_MI_remote
1.02919	14.7181	4.88914	0.000413737	0.00866844	0.161321	Flnb;Flnc	Q8VHX6;Q80X90	0.000413737	MI_IZ_vs_MI_remote
-0.703484	13.4966	-4.87742	0.000421818	0.00869245	0.141916	Slc8a1	P70414	0.000421818	MI_IZ_vs_MI_remote
1.11979	10.8868	5.535	0.000431244	0.00878217	0.398435	Fv4	P10404;P11370	0.000431244	MI_IZ_vs_MI_remote
0.985011	11.7567	4.86515	0.00043045	0.00878217	0.121593	Emilin2	Q8K482	0.00043045	MI_IZ_vs_MI_remote
1.06565	15.072	4.85717	0.000436171	0.00879402	0.10835	Rac1;Rac2;Rac3	P63001;P60764;Q05144	0.000436171	MI_IZ_vs_MI_remote
0.816657	11.8389	4.85615	0.000436907	0.00879402	0.106659	Pabpc1;Pabpc2;Pabpc6	Q62029;Q9D4E6;P29341	0.000436907	MI_IZ_vs_MI_remote
2.05002	14.127	5.0102	0.000446467	0.00893451	0.145644	Alox5ap	P30355	0.000446467	MI_IZ_vs_MI_remote
2.16655	12.1395	4.82653	0.000458868	0.00905961	0.0574626	Slc4a1	P04919	0.000458868	MI_IZ_vs_MI_remote
1.04591	10.7443	5.86889	0.00046057	0.00905961	0.445158	Kctd12;Kctd16	Q5DTY9;Q6WVG3	0.00046057	MI_IZ_vs_MI_remote
-0.54385	14.5918	-4.83049	0.000455867	0.00905961	0.0640433	Iars2	Q8BIJ6	0.000455867	MI_IZ_vs_MI_remote
0.592902	11.7757	4.81478	0.000467895	0.0091517	0.0379208	Septin9	Q80UG5	0.000467895	MI_IZ_vs_MI_remote
-1.13495	11.2529	-5.17285	0.000479692	0.00927763	0.238659	Pam	P97467	0.000479692	MI_IZ_vs_MI_remote
-1.19933	13.739	-4.80223	0.000477744	0.00927763	0.0170247	Ogn	Q62000	0.000477744	MI_IZ_vs_MI_remote
-0.786902	15.7654	-4.79095	0.000486789	0.00936257	-0.00178861	Pdlim5	Q8CI51	0.000486789	MI_IZ_vs_MI_remote
-0.770299	11.904	-4.93959	0.000497669	0.00951894	0.0798582	Mfn1;Mfn2	Q80U63;Q811U4	0.000497669	MI_IZ_vs_MI_remote
-0.608137	12.6545	-4.76416	0.000508981	0.00962892	-0.0465067	Prob1	A0A087WR45	0.000508981	MI_IZ_vs_MI_remote
0.972193	13.214	4.76618	0.000507279	0.00962892	-0.0431464	H2az1;H2az2	Q3THW5;P0C0S6	0.000507279	MI_IZ_vs_MI_remote
0.8634	11.7017	4.92126	0.000511948	0.00963241	0.0515686	Pnkp	Q9JLV6	0.000511948	MI_IZ_vs_MI_remote
-0.602132	13.4442	-4.74948	0.0005216	0.00976097	-0.0710716	Sspn	Q62147	0.0005216	MI_IZ_vs_MI_remote
0.706031	13.469	4.74202	0.00052813	0.00983004	-0.083551	Cap1;Cap2	P40124;Q9CYT6	0.00052813	MI_IZ_vs_MI_remote
0.901286	13.3308	4.72076	0.000547224	0.00988718	-0.119173	Sub1	P11031	0.000547224	MI_IZ_vs_MI_remote
1.21068	12.1809	5.36126	0.000536158	0.00988718	0.153533	Hmox1	P14901	0.000536158	MI_IZ_vs_MI_remote
0.773712	11.7529	4.87784	0.000547549	0.00988718	-0.0156701	Gsr	P47791	0.000547549	MI_IZ_vs_MI_remote
-0.945846	12.7399	-4.73	0.000538839	0.00988718	-0.103684	Synpo2	Q91YE8	0.000538839	MI_IZ_vs_MI_remote
-0.846086	11.74	-4.71955	0.000548336	0.00988718	-0.121208	Ppp1r3a	Q99MR9	0.000548336	MI_IZ_vs_MI_remote
0.974739	12.8731	4.72371	0.000544532	0.00988718	-0.114226	Iqgap1	Q9JKF1	0.000544532	MI_IZ_vs_MI_remote
2.26965	11.1374	6.22775	0.000555418	0.00995603	0.354836	Plaur	P35456	0.000555418	MI_IZ_vs_MI_remote
-0.728034	18.6978	-4.70308	0.000563658	0.00995603	-0.148849	Tpm2	P58774	0.000563658	MI_IZ_vs_MI_remote
1.01835	11.1933	4.85972	0.000563172	0.00995603	-0.0884628	Serpinb1a	Q9D154	0.000563172	MI_IZ_vs_MI_remote
0.640867	13.0175	4.70393	0.000562857	0.00995603	-0.147423	Coro1b	Q9WUM3	0.000562857	MI_IZ_vs_MI_remote
-0.579862	14.2422	-4.69235	0.000573884	0.0100852	-0.166881	Sorbs1	Q62417	0.000573884	MI_IZ_vs_MI_remote
-0.658189	13.3622	-4.68337	0.000582589	0.0101353	-0.18198	Cand2	Q6ZQ73	0.000582589	MI_IZ_vs_MI_remote
-0.861753	17.5744	-4.68491	0.000581089	0.0101353	-0.179394	Myh1;Myh2;Myh3;Myh4;Myh6;Myh7;Myh8	Q91Z83;G3UW82;Q02566;P13541;Q5SX39;P13542;Q5SX40	0.000581089	MI_IZ_vs_MI_remote
0.536843	13.2368	4.67614	0.000589701	0.010151	-0.194149	D1Pas1;Ddx3x;Ddx3y;Ddx4	P16381;Q61496;Q62095;Q62167	0.000589701	MI_IZ_vs_MI_remote
0.574143	14.1014	4.67699	0.000588854	0.010151	-0.192707	1700009N14Rik;Ran	P62827;Q14AA6	0.000588854	MI_IZ_vs_MI_remote
-0.563843	15.2999	-4.67353	0.000592289	0.010151	-0.19854	Dag1	Q62165	0.000592289	MI_IZ_vs_MI_remote
0.685395	14.429	4.66825	0.000597563	0.0101909	-0.20743	Cav1	P49817	0.000597563	MI_IZ_vs_MI_remote
-0.723058	14.4042	-4.65434	0.000611693	0.0103808	-0.230868	Ndufa6	Q9CQZ5	0.000611693	MI_IZ_vs_MI_remote
-0.608123	14.1856	-4.64523	0.000621135	0.0104896	-0.246229	Sgcg	P82348	0.000621135	MI_IZ_vs_MI_remote
0.637137	12.7628	4.6419	0.000624626	0.0104974	-0.25185	Raly	Q64012	0.000624626	MI_IZ_vs_MI_remote
-0.987149	13.4998	-4.63512	0.000631796	0.0105666	-0.263295	Crmp1;Dpysl3	P97427;Q62188	0.000631796	MI_IZ_vs_MI_remote
-0.672399	13.879	-4.61649	0.00065194	0.0106968	-0.294766	Tnxb	A0A5F8MPH8	0.00065194	MI_IZ_vs_MI_remote
-0.71364	18.7745	-4.61749	0.000650846	0.0106968	-0.293082	Myh13;Myh2;Myh3;Myh6;Myh8	B1AR69;G3UW82;Q02566;P13541;P13542	0.000650846	MI_IZ_vs_MI_remote
0.612122	12.6501	4.61799	0.000650292	0.0106968	-0.292228	Srsf6	Q3TWW8	0.000650292	MI_IZ_vs_MI_remote
-0.579205	13.7105	-4.62118	0.000646806	0.0106968	-0.286838	Mapre2	Q8R001	0.000646806	MI_IZ_vs_MI_remote
0.961068	16.8406	4.60859	0.000660685	0.0107385	-0.308127	H1-1;H1-2;H1-3;H1-4	P43275;P15864;P43274;P43277	0.000660685	MI_IZ_vs_MI_remote
0.723907	12.6332	4.60918	0.000660027	0.0107385	-0.307127	Rbbp4	Q60972	0.000660027	MI_IZ_vs_MI_remote
0.932665	15.6216	4.58787	0.000684219	0.0107671	-0.343221	C3	P01027	0.000684219	MI_IZ_vs_MI_remote
0.61092	12.6301	4.60155	0.000668585	0.0107671	-0.320045	Itga5	P11688	0.000668585	MI_IZ_vs_MI_remote
-0.493528	14.7538	-4.59212	0.000679314	0.0107671	-0.336008	Sgcd	P82347	0.000679314	MI_IZ_vs_MI_remote
-0.789151	15.0465	-5.18575	0.000670938	0.0107671	-0.0726895	Sec31b	Q3TZ89	0.000670938	MI_IZ_vs_MI_remote
1.53077	11.1135	4.58867	0.000683291	0.0107671	-0.341861	Rcc2	Q8BK67	0.000683291	MI_IZ_vs_MI_remote
1.63833	13.3145	5.51269	0.000682565	0.0107671	0.0494983	Ica;Tf	Q921I1;Q9DBD0	0.000682565	MI_IZ_vs_MI_remote
0.914381	12.9809	4.59859	0.00067193	0.0107671	-0.325049	Actr3;Actr3b	Q99JY9;Q641P0	0.00067193	MI_IZ_vs_MI_remote
1.08946	12.8822	4.58187	0.000691188	0.0107882	-0.353381	Myl12b;Myl9	Q3THE2;Q9CQ19	0.000691188	MI_IZ_vs_MI_remote
0.961174	12.4171	4.58135	0.000691793	0.0107882	-0.354259	Pabpc1;Pabpc6	Q9D4E6;P29341	0.000691793	MI_IZ_vs_MI_remote
1.16888	15.7856	4.57264	0.000702066	0.0108993	-0.369038	Apoe	P08226	0.000702066	MI_IZ_vs_MI_remote
0.474755	11.2502	4.56413	0.000712252	0.0110081	-0.383479	Cacybp	Q9CXW3	0.000712252	MI_IZ_vs_MI_remote
-0.724413	12.6282	-4.55726	0.000720585	0.0110151	-0.395139	Smim20	D3Z7Q2	0.000720585	MI_IZ_vs_MI_remote
1.57774	11.7956	5.46272	0.000722248	0.0110151	-0.00642122	Ass1	P16460	0.000722248	MI_IZ_vs_MI_remote
1.27906	13.1045	5.12961	0.000721492	0.0110151	-0.146059	Hcls1	P49710	0.000721492	MI_IZ_vs_MI_remote
-0.774586	13.1087	-4.54027	0.000741648	0.0110672	-0.424022	Nrp1	P97333	0.000741648	MI_IZ_vs_MI_remote
-0.501448	13.158	-4.54485	0.000735907	0.0110672	-0.416232	Tln2	Q71LX4	0.000735907	MI_IZ_vs_MI_remote
-0.540058	12.2778	-4.54205	0.000739408	0.0110672	-0.42099	Mfn1	Q811U4	0.000739408	MI_IZ_vs_MI_remote
0.965569	16.6003	4.54937	0.000730289	0.0110672	-0.40855	H2ac1;H2ac11;H2ac12;H2ac13;H2ac15;H2ac20;H2ac4;H2ac6;H2ac7;H2ac8;H2aj;H2aw;Hist1h2af;Hist1h2an;Hist1h2ao;Hist1h2ap;Hist2h2aa2	Q8CGP6;C0HKE3;Q8CGP7;Q64523;C0HKE6;Q8CGP5;C0HKE8;C0HKE1;Q8R1M2;C0HKE9;C0HKE5;Q8BFU2;C0HKE2;C0HKE7;Q8CGP4;Q6GSS7;C0HKE4	0.000730289	MI_IZ_vs_MI_remote
-0.652026	13.1937	-4.54132	0.00074032	0.0110672	-0.422225	Cap2	Q9CYT6	0.00074032	MI_IZ_vs_MI_remote
-0.70786	14.6504	-4.53522	0.000748022	0.0111144	-0.432601	Nexn	Q7TPW1	0.000748022	MI_IZ_vs_MI_remote
1.06071	11.5777	4.5223	0.000764618	0.0113124	-0.454598	Mbl1	P39039	0.000764618	MI_IZ_vs_MI_remote
0.556117	15.5711	4.51798	0.000770247	0.0113472	-0.461949	Rpl8	P62918	0.000770247	MI_IZ_vs_MI_remote
-0.843346	13.852	-4.51118	0.000779196	0.0114304	-0.473529	Tmod1	P49813	0.000779196	MI_IZ_vs_MI_remote
0.784028	13.2212	4.50222	0.000791171	0.0115085	-0.488815	Gm7298;Mug1	P28665;A0A0N4SVU1	0.000791171	MI_IZ_vs_MI_remote
-0.539999	12.6067	-4.50359	0.000789326	0.0115085	-0.486475	Mmaa	Q8C7H1	0.000789326	MI_IZ_vs_MI_remote
-0.703654	13.0066	-4.49945	0.000794905	0.0115145	-0.493534	Dsc2	P55292	0.000794905	MI_IZ_vs_MI_remote
-0.518679	14.9998	-4.48614	0.000813117	0.0116805	-0.516237	Atp1a1;Atp1a2;Atp1a3	Q8VDN2;Q6PIC6;Q6PIE5	0.000813117	MI_IZ_vs_MI_remote
-0.718268	12.4989	-4.48822	0.000810244	0.0116805	-0.51269	Gmpr	Q9DCZ1	0.000810244	MI_IZ_vs_MI_remote
-0.615679	12.914	-4.48264	0.000817979	0.0117018	-0.522212	Ecsit	Q9QZH6	0.000817979	MI_IZ_vs_MI_remote
0.875776	14.579	4.47925	0.000822728	0.0117213	-0.528013	Tln1	P26039	0.000822728	MI_IZ_vs_MI_remote
-0.69335	15.7531	-4.46005	0.000850113	0.0119638	-0.560827	Hk1;Hk2;Hkdc1	P17710;Q91W97;O08528	0.000850113	MI_IZ_vs_MI_remote
0.716686	12.0008	4.6001	0.000847067	0.0119638	-0.452218	Snrpc	Q62241	0.000847067	MI_IZ_vs_MI_remote
-0.591091	12.5205	-4.46288	0.000846007	0.0119638	-0.555976	Ank2	Q8C8R3	0.000846007	MI_IZ_vs_MI_remote
1.27384	12.2151	4.45675	0.000854916	0.0119827	-0.566472	Gm8909;H2-K1;H2-L;H2-Q1;H2-Q10;H2-Q4;H2-Q6;H2-Q7;H2-Q8	P14430;P01898;P01896;O19441;P01901;P01897;Q8HWB2;P79568;G3UXE9;P14429	0.000854916	MI_IZ_vs_MI_remote
-0.506488	15.1168	-4.45099	0.000863362	0.0120523	-0.576324	Mtch2	Q791V5	0.000863362	MI_IZ_vs_MI_remote
0.645955	13.0555	4.43546	0.000886583	0.0122009	-0.602918	Cald1	E9QA15	0.000886583	MI_IZ_vs_MI_remote
0.557999	12.7487	4.43759	0.000883356	0.0122009	-0.599264	Eif4a1	P60843	0.000883356	MI_IZ_vs_MI_remote
0.769419	13.2495	4.43446	0.000888105	0.0122009	-0.604636	Anxa11	P97384	0.000888105	MI_IZ_vs_MI_remote
-0.718742	11.348	-4.57417	0.000882772	0.0122009	-0.493531	Fcgrt	Q61559	0.000882772	MI_IZ_vs_MI_remote
1.20566	11.431	4.42039	0.000909744	0.0123511	-0.628756	H1-1	P43275	0.000909744	MI_IZ_vs_MI_remote
0.737758	12.0082	4.42162	0.000907827	0.0123511	-0.626643	Snu13	Q9D0T1	0.000907827	MI_IZ_vs_MI_remote
-0.600783	13.5071	-4.55755	0.000906484	0.0123511	-0.520055	Pdk1;Pdk2	Q9JK42;Q8BFP9	0.000906484	MI_IZ_vs_MI_remote
-0.544257	12.6206	-4.39711	0.000946759	0.0128034	-0.66871	Limch1	Q3UH68	0.000946759	MI_IZ_vs_MI_remote
0.83118	12.0067	4.3926	0.000954102	0.0128525	-0.67645	Ctsz	Q9WUU7	0.000954102	MI_IZ_vs_MI_remote
1.33027	10.373	4.91231	0.000959848	0.0128798	-0.374823	Cfp	P11680	0.000959848	MI_IZ_vs_MI_remote
-0.621881	13.8212	-4.38332	0.000969419	0.0129082	-0.692403	Mlip	Q5FW52	0.000969419	MI_IZ_vs_MI_remote
0.563261	13.7678	4.3852	0.0009663	0.0129082	-0.689174	Ddx39a;Ddx39b	Q8VDW0;Q9Z1N5	0.0009663	MI_IZ_vs_MI_remote
-0.873333	17.9793	-4.38027	0.000974511	0.0129263	-0.69765	Actn2	Q9JI91	0.000974511	MI_IZ_vs_MI_remote
1.2116	17.1804	4.378	0.000978313	0.0129272	-0.701551	H1-2;H1-3;H1-4;H1-5;H1-6	P15864;P43274;Q07133;P43276;P43277	0.000978313	MI_IZ_vs_MI_remote
1.01604	14.1231	4.37031	0.000991325	0.0130493	-0.714785	Macroh2a1	Q9QZQ8	0.000991325	MI_IZ_vs_MI_remote
0.742353	13.0919	4.36785	0.000995523	0.0130549	-0.719018	Psmb10	O35955	0.000995523	MI_IZ_vs_MI_remote
-0.793302	13.5401	-4.35431	0.00101898	0.0131231	-0.742344	Dsg2	O55111	0.00101898	MI_IZ_vs_MI_remote
0.954577	18.2731	4.35391	0.00101967	0.0131231	-0.743023	H1-2;H1-3;H1-4;H1-6	P15864;P43274;Q07133;P43277	0.00101967	MI_IZ_vs_MI_remote
0.879041	14.1695	4.35506	0.00101766	0.0131231	-0.74104	Tpm4	Q6IRU2	0.00101766	MI_IZ_vs_MI_remote
-0.837711	15.5028	-4.3608	0.00100767	0.0131231	-0.731161	Ndufb5	Q9CQH3	0.00100767	MI_IZ_vs_MI_remote
-0.913444	15.7507	-4.35454	0.00101858	0.0131231	-0.741946	Crip2	Q9DCT8	0.00101858	MI_IZ_vs_MI_remote
-0.549206	15.347	-4.34159	0.00104153	0.0133547	-0.76426	Atp1a1;Atp1a2;Atp1a3;Atp4a	Q8VDN2;Q6PIC6;Q64436;Q6PIE5	0.00104153	MI_IZ_vs_MI_remote
-0.728692	12.5066	-4.33391	0.00105539	0.0134825	-0.777498	Mrps23	Q8VE22	0.00105539	MI_IZ_vs_MI_remote
0.717092	12.1685	4.32357	0.00107438	0.0136684	-0.795354	Banf1	O54962	0.00107438	MI_IZ_vs_MI_remote
0.704229	15.0288	4.3217	0.00107784	0.0136684	-0.798576	Msn;Rdx	P26043;P26041	0.00107784	MI_IZ_vs_MI_remote
1.5243	12.134	5.09409	0.00110735	0.0138407	-0.431127	Mcm3	P25206	0.00110735	MI_IZ_vs_MI_remote
0.576361	14.8911	4.30958	0.00110061	0.0138407	-0.81951	Pfn1	P62962	0.00110061	MI_IZ_vs_MI_remote
0.8025	11.1745	4.43503	0.00110343	0.0138407	-0.716778	Cyrib	Q921M7	0.00110343	MI_IZ_vs_MI_remote
-0.760886	15.5309	-4.30601	0.00110742	0.0138407	-0.825682	Myoz2	Q9JJW5	0.00110742	MI_IZ_vs_MI_remote
-0.721242	14.5668	-4.30078	0.00111746	0.013916	-0.83472	Bgn	P28653	0.00111746	MI_IZ_vs_MI_remote
1.41417	10.8729	5.0819	0.00112347	0.0139407	-0.427382	Igkv5-39	A0A075B5M7	0.00112347	MI_IZ_vs_MI_remote
0.908824	11.2294	4.28862	0.00114119	0.0139605	-0.85576	Apoc3	P33622	0.00114119	MI_IZ_vs_MI_remote
0.956177	12.8419	4.29122	0.00113608	0.0139605	-0.851261	U2surp	Q6NV83	0.00113608	MI_IZ_vs_MI_remote
-0.647859	13.8074	-4.28899	0.00114045	0.0139605	-0.855106	Ablim1	Q8K4G5	0.00114045	MI_IZ_vs_MI_remote
0.743089	15.7417	4.2887	0.00114103	0.0139605	-0.855618	Nono;Sfpq	Q99K48;Q8VIJ6	0.00114103	MI_IZ_vs_MI_remote
3.10488	13.0558	5.06188	0.00115051	0.0139757	-0.469264	Epx;Mpo	P11247;P49290	0.00115051	MI_IZ_vs_MI_remote
-0.690302	13.011	-4.28492	0.00114851	0.0139757	-0.862158	Me3	Q8BMF3	0.00114851	MI_IZ_vs_MI_remote
0.44811	14.7817	4.27686	0.00116463	0.0139999	-0.876113	Rps18;Rps18-ps5;Rps18-ps6	F6YVP7;P62270;A0A1Y7VKY1	0.00116463	MI_IZ_vs_MI_remote
1.09568	12.5418	5.05207	0.00116401	0.0139999	-0.480909	Gm20379;Hmgn2	P09602;A0A087WR34	0.00116401	MI_IZ_vs_MI_remote
-0.603525	12.548	-4.40216	0.00116361	0.0139999	-0.769901	Clasp1	Q80TV8	0.00116361	MI_IZ_vs_MI_remote
0.8287	13.1897	4.27331	0.0011718	0.0140372	-0.882251	Arpc4	P59999	0.0011718	MI_IZ_vs_MI_remote
1.12324	11.0173	4.26915	0.00118026	0.0140415	-0.889455	Raver1	Q9CW46	0.00118026	MI_IZ_vs_MI_remote
-0.640531	12.3998	-4.27068	0.00117716	0.0140415	-0.886817	Coq5	Q9CXI0	0.00117716	MI_IZ_vs_MI_remote
2.48048	12.2401	5.44254	0.00118559	0.0140565	-0.367303	Ncf1	Q09014	0.00118559	MI_IZ_vs_MI_remote
-0.691689	11.8153	-4.26206	0.00119484	0.0141179	-0.901744	Ppp1r14c	Q8R4S0	0.00119484	MI_IZ_vs_MI_remote
1.23721	18.5357	4.24982	0.00122045	0.0142743	-0.922963	H1-2;H1-3	P15864;P43277	0.00122045	MI_IZ_vs_MI_remote
1.06702	12.5692	4.25118	0.00121759	0.0142743	-0.920616	Tpm2;Tpm4	P58774;Q6IRU2	0.00121759	MI_IZ_vs_MI_remote
1.41007	12.3985	4.73688	0.00121466	0.0142743	-0.673158	Pdpn	Q62011	0.00121466	MI_IZ_vs_MI_remote
-0.633701	14.6291	-4.24322	0.0012345	0.0143418	-0.934424	Tcap	O70548	0.0012345	MI_IZ_vs_MI_remote
-0.616962	11.9304	-4.2433	0.00123433	0.0143418	-0.93428	Vwa1	Q8R2Z5	0.00123433	MI_IZ_vs_MI_remote
-0.663419	15.7854	-4.2363	0.00124941	0.0144664	-0.946431	Atp1b1	P14094	0.00124941	MI_IZ_vs_MI_remote
0.958445	12.713	4.22896	0.00126542	0.014603	-0.959178	Itih1	Q61702	0.00126542	MI_IZ_vs_MI_remote
0.661362	11.1504	4.22608	0.00127176	0.0146274	-0.964178	Git2	Q9JLQ2	0.00127176	MI_IZ_vs_MI_remote
0.843857	11.8434	4.34045	0.00128609	0.0146945	-0.870014	Gatad2a	Q8CHY6	0.00128609	MI_IZ_vs_MI_remote
2.79341	11.0831	4.69695	0.00128232	0.0146945	-0.72809	Plac8	Q9JI48	0.00128232	MI_IZ_vs_MI_remote
0.929869	14.768	4.21512	0.0012962	0.0147313	-0.983222	Eef1a1	P10126	0.0012962	MI_IZ_vs_MI_remote
-0.538097	14.4135	-4.2144	0.00129782	0.0147313	-0.98447	Dmd	P11531	0.00129782	MI_IZ_vs_MI_remote
-0.812555	14.1608	-4.20728	0.00131397	0.0148659	-0.996843	Coq8a	Q60936	0.00131397	MI_IZ_vs_MI_remote
-0.738923	13.886	-4.20298	0.00132385	0.0149289	-1.00434	Agl	F8VPN4	0.00132385	MI_IZ_vs_MI_remote
1.00939	10.8384	4.94059	0.00133041	0.0149541	-0.614372	Lrrfip1	Q3UZ39	0.00133041	MI_IZ_vs_MI_remote
-0.903836	17.7394	-4.19664	0.00133852	0.0149966	-1.01536	Actn1;Actn2	Q7TPR4;Q9JI91	0.00133852	MI_IZ_vs_MI_remote
-0.584789	12.6861	-4.19328	0.00134637	0.0150359	-1.02121	Cds2	Q99L43	0.00134637	MI_IZ_vs_MI_remote
1.23827	11.9209	4.30296	0.00136706	0.0151206	-0.982269	Slc2a1	P17809	0.00136706	MI_IZ_vs_MI_remote
-0.547538	12.0061	-4.18784	0.00135917	0.0151206	-1.03068	Anks1a	P59672	0.00135917	MI_IZ_vs_MI_remote
0.560333	13.088	4.18522	0.00136538	0.0151206	-1.03524	Sf1	Q64213	0.00136538	MI_IZ_vs_MI_remote
0.76528	12.5462	4.17634	0.00138665	0.01524	-1.0507	Anxa3	O35639	0.00138665	MI_IZ_vs_MI_remote
0.849549	10.0443	4.17657	0.0013861	0.01524	-1.0503	Cep170	Q6A065	0.0013861	MI_IZ_vs_MI_remote
-0.575868	15.4292	-4.17004	0.00140196	0.0153536	-1.06168	Obscn	A2AAJ9	0.00140196	MI_IZ_vs_MI_remote
-0.751493	14.8601	-4.16499	0.00141437	0.0153536	-1.07049	Tpm3	P21107	0.00141437	MI_IZ_vs_MI_remote
-0.568447	13.6142	-4.16592	0.00141206	0.0153536	-1.06886	Bcl2l13	P59017	0.00141206	MI_IZ_vs_MI_remote
-0.417472	12.9795	-4.16484	0.00141473	0.0153536	-1.07075	Cmya5	Q70KF4	0.00141473	MI_IZ_vs_MI_remote
0.494941	12.5597	4.16234	0.0014209	0.0153724	-1.0751	Txnrd1	Q9JMH6	0.0014209	MI_IZ_vs_MI_remote
-0.495249	12.1684	-4.15011	0.00145155	0.0153811	-1.09644	Ccdc141	E9Q8Q6	0.00145155	MI_IZ_vs_MI_remote
0.793329	12.2254	4.15073	0.00144999	0.0153811	-1.09537	Eif6	O55135	0.00144999	MI_IZ_vs_MI_remote
0.592139	12.9874	4.14786	0.00145725	0.0153811	-1.10036	Impdh2	P24547	0.00145725	MI_IZ_vs_MI_remote
-0.533842	13.861	-4.15923	0.00142863	0.0153811	-1.08052	Map4	P27546	0.00142863	MI_IZ_vs_MI_remote
0.767267	12.2655	4.15661	0.00143519	0.0153811	-1.08511	Top1	Q04750	0.00143519	MI_IZ_vs_MI_remote
-0.857086	14.0161	-4.15107	0.00144913	0.0153811	-1.09477	Sorbs1;Sorbs2	Q3UTJ2;Q62417	0.00144913	MI_IZ_vs_MI_remote
-0.639542	11.8802	-4.1515	0.00144803	0.0153811	-1.09401	Fyco1	Q8VDC1	0.00144803	MI_IZ_vs_MI_remote
-0.895892	14.067	-4.14787	0.00145723	0.0153811	-1.10035	Hps6;Myoz2	Q9JJW5;Q8BLY7	0.00145723	MI_IZ_vs_MI_remote
0.725887	12.0672	4.14254	0.00147086	0.0154273	-1.10965	Cad	B2RQC6	0.00147086	MI_IZ_vs_MI_remote
0.584536	14.6834	4.1392	0.00147945	0.0154273	-1.11547	Apoh	Q01339	0.00147945	MI_IZ_vs_MI_remote
0.61254	14.2151	4.14053	0.00147603	0.0154273	-1.11316	Ddx5	Q61656	0.00147603	MI_IZ_vs_MI_remote
-0.66002	15.3784	-4.14192	0.00147246	0.0154273	-1.11074	Ndufa12	Q7TMF3	0.00147246	MI_IZ_vs_MI_remote
-0.606917	13.1573	-4.12724	0.00151069	0.0155753	-1.13637	Speg	Q62407	0.00151069	MI_IZ_vs_MI_remote
0.675933	13.9926	4.12943	0.00150494	0.0155753	-1.13255	Lrrc59	Q922Q8	0.00150494	MI_IZ_vs_MI_remote
1.18851	13.735	4.12688	0.00151164	0.0155753	-1.137	Ifitm2;Ifitm3	Q99J93;Q9CQW9	0.00151164	MI_IZ_vs_MI_remote
-0.677043	17.2691	-4.1304	0.00150239	0.0155753	-1.13086	Dlst	Q9D2G2	0.00150239	MI_IZ_vs_MI_remote
0.444692	14.9501	4.12507	0.00151643	0.0155783	-1.14016	Rpl35a	O55142	0.00151643	MI_IZ_vs_MI_remote
3.06145	15.543	4.3681	0.0015551	0.0159282	-0.998135	Abcb9	Q9JJ59	0.0015551	MI_IZ_vs_MI_remote
0.616052	12.5929	4.10672	0.00156589	0.0159645	-1.17224	Dhx15	O35286	0.00156589	MI_IZ_vs_MI_remote
-0.691856	14.5386	-4.10601	0.00156786	0.0159645	-1.17349	Smyd1	P97443	0.00156786	MI_IZ_vs_MI_remote
0.704985	11.7132	4.08777	0.00161875	0.0164343	-1.20542	Arhgef2	Q60875	0.00161875	MI_IZ_vs_MI_remote
0.517916	14.7381	4.08479	0.00162721	0.016472	-1.21063	Srsf2	Q62093	0.00162721	MI_IZ_vs_MI_remote
-0.808514	19.0544	-4.07286	0.00166159	0.0167222	-1.23152	Tpm1	P58771	0.00166159	MI_IZ_vs_MI_remote
-0.712802	18.5714	-4.0733	0.00166032	0.0167222	-1.23076	Ogdh;Ogdhl	Q60597;E9Q7L0	0.00166032	MI_IZ_vs_MI_remote
-0.773835	16.7606	-4.06053	0.00169794	0.0170044	-1.25314	Idh3b	Q91VA7	0.00169794	MI_IZ_vs_MI_remote
0.858092	10.8672	4.17021	0.00169946	0.0170044	-1.14869	Ap3b1	Q9Z1T1	0.00169946	MI_IZ_vs_MI_remote
-0.82678	17.4204	-4.05643	0.0017102	0.0170626	-1.26033	Atp5f1d	Q9D3D9	0.0017102	MI_IZ_vs_MI_remote
-0.778596	12.6792	-4.05159	0.00172481	0.0170839	-1.26883	Ctnna3	Q65CL1	0.00172481	MI_IZ_vs_MI_remote
0.651072	10.8423	4.05366	0.00171854	0.0170839	-1.26519	Swap70	Q6A028	0.00171854	MI_IZ_vs_MI_remote
-0.513009	12.6323	-4.05082	0.00172714	0.0170839	-1.27018	Mrpl24	Q9CQ06	0.00172714	MI_IZ_vs_MI_remote
-0.841653	13.8102	-4.04347	0.0017496	0.0172567	-1.28308	Actn2;Actn4	P57780;Q9JI91	0.0017496	MI_IZ_vs_MI_remote
0.7792	12.7053	4.03618	0.00177216	0.0174296	-1.29588	Hdac1;Hdac2	O09106;P70288	0.00177216	MI_IZ_vs_MI_remote
1.0801	15.553	4.13679	0.00179585	0.0175628	-1.25682	H1-2	P15864	0.00179585	MI_IZ_vs_MI_remote
-0.528221	17.0254	-4.02932	0.00179367	0.0175628	-1.30793	Atp1a1	Q8VDN2	0.00179367	MI_IZ_vs_MI_remote
1.52435	11.3316	5.03694	0.00180759	0.0176278	-0.76142	Hk3	Q3TRM8	0.00180759	MI_IZ_vs_MI_remote
0.58697	14.4745	4.0177	0.0018307	0.0176554	-1.32834	Gnai2	P08752	0.0018307	MI_IZ_vs_MI_remote
0.837972	16.0038	4.02017	0.00182278	0.0176554	-1.32401	S100a6	P14069	0.00182278	MI_IZ_vs_MI_remote
-0.655448	14.4241	-4.01767	0.00183081	0.0176554	-1.3284	Snta1	Q61234	0.00183081	MI_IZ_vs_MI_remote
0.687424	12.1542	4.01971	0.00182426	0.0176554	-1.32482	Chmp4b	Q9D8B3	0.00182426	MI_IZ_vs_MI_remote
0.559791	14.4547	4.01564	0.00183736	0.0176692	-1.33196	Tln1;Tln2	P26039;Q71LX4	0.00183736	MI_IZ_vs_MI_remote
-0.829117	10.7916	-4.43081	0.00185146	0.0177555	-1.02936	Scrn1	Q9CZC8	0.00185146	MI_IZ_vs_MI_remote
-0.649647	18.6452	-4.0068	0.00186618	0.0178472	-1.3475	Dlat	Q8BMF4	0.00186618	MI_IZ_vs_MI_remote
-0.425476	14.3208	-4.00037	0.00188746	0.0180011	-1.35882	Dnm1l	Q8K1M6	0.00188746	MI_IZ_vs_MI_remote
0.450734	13.0874	3.99844	0.00189389	0.0180127	-1.36222	Eef1b;Eef1d	P57776;O70251	0.00189389	MI_IZ_vs_MI_remote
-0.809002	15.4907	-3.99686	0.00189915	0.0180133	-1.36499	Pygb	Q8CI94	0.00189915	MI_IZ_vs_MI_remote
0.734574	14.195	3.99405	0.0019086	0.0180535	-1.36994	Flnb	Q80X90	0.0019086	MI_IZ_vs_MI_remote
0.744899	12.5076	3.9917	0.0019165	0.0180788	-1.37406	Nos2;Nos3	P70313;P29477	0.0019165	MI_IZ_vs_MI_remote
1.00479	13.1516	3.98738	0.00193115	0.0181183	-1.38167	Kng1	O08677	0.00193115	MI_IZ_vs_MI_remote
-0.859836	12.9535	-4.22693	0.00192977	0.0181183	-1.2154	Map1lc3a;Map1lc3b	Q9CQV6;Q91VR7	0.00192977	MI_IZ_vs_MI_remote
0.864514	13.9353	3.98437	0.00194145	0.0181656	-1.38697	Kng1;Kng2	O08677;Q6S9I3	0.00194145	MI_IZ_vs_MI_remote
0.684441	12.3864	3.98013	0.00195601	0.0182526	-1.39444	Ruvbl2	Q9WTM5	0.00195601	MI_IZ_vs_MI_remote
0.53251	13.2027	3.97408	0.00197702	0.018399	-1.4051	Fubp1	Q91WJ8	0.00197702	MI_IZ_vs_MI_remote
-0.814811	12.0963	-4.20702	0.00198987	0.018469	-1.20424	Mlf1	Q9QWV4	0.00198987	MI_IZ_vs_MI_remote
-0.957596	14.8544	-3.96826	0.00199743	0.0184896	-1.41535	Dpep1	P31428	0.00199743	MI_IZ_vs_MI_remote
0.745417	11.6113	4.37192	0.00201103	0.0185658	-1.18439	C1qc	Q02105	0.00201103	MI_IZ_vs_MI_remote
-0.784778	15.476	-3.96179	0.00202036	0.0186024	-1.42674	Apoo	Q9DCZ4	0.00202036	MI_IZ_vs_MI_remote
1.23369	12.8993	3.95762	0.00203532	0.0186904	-1.4341	Ptma	P26350	0.00203532	MI_IZ_vs_MI_remote
0.930377	19.1774	3.95512	0.00204434	0.0187236	-1.43851	H4f16	P62806	0.00204434	MI_IZ_vs_MI_remote
-0.724185	18.8367	-3.9453	0.0020801	0.0190008	-1.45582	Tpm1;Tpm2	P58774;P58771	0.0020801	MI_IZ_vs_MI_remote
-0.538561	13.5251	-3.94076	0.0020969	0.0190309	-1.46384	Prkar2a	P12367	0.0020969	MI_IZ_vs_MI_remote
0.472451	13.3786	3.9371	0.00211051	0.0190309	-1.47029	Rpl18a	P62717	0.00211051	MI_IZ_vs_MI_remote
0.783243	13.1281	3.93859	0.00210495	0.0190309	-1.46767	Zyx	Q62523	0.00210495	MI_IZ_vs_MI_remote
-0.82195	16.7897	-3.937	0.00211088	0.0190309	-1.47047	Ndufa13	Q9ERS2	0.00211088	MI_IZ_vs_MI_remote
-0.762969	11.57	-3.94186	0.00209279	0.0190309	-1.46189	Homer1;Homer2;Homer3	Q9Z2Y3;Q99JP6;Q9QWW1	0.00209279	MI_IZ_vs_MI_remote
0.844878	11.1932	4.03597	0.00212276	0.0190388	-1.37087	Smarca5	Q91ZW3	0.00212276	MI_IZ_vs_MI_remote
-0.454077	13.6534	-3.93439	0.00212065	0.0190388	-1.47508	Abcb8	Q9CXJ4	0.00212065	MI_IZ_vs_MI_remote
-0.876771	13.9639	-3.92899	0.002141	0.0191528	-1.4846	Neb	A0A571BF58	0.002141	MI_IZ_vs_MI_remote
0.680068	14.8807	3.92295	0.00216402	0.0192225	-1.49527	Cfh	P06909	0.00216402	MI_IZ_vs_MI_remote
-0.608657	17.4954	-3.92258	0.00216545	0.0192225	-1.49593	Immt	Q8CAQ8	0.00216545	MI_IZ_vs_MI_remote
0.617852	11.5844	3.92547	0.00215439	0.0192225	-1.49082	Psmb3	Q9R1P1	0.00215439	MI_IZ_vs_MI_remote
0.776295	12.6827	3.9157	0.00219198	0.0193224	-1.50807	Impdh1;Impdh2	P24547;P50096	0.00219198	MI_IZ_vs_MI_remote
-0.644117	14.9984	-3.91541	0.00219309	0.0193224	-1.50858	Synpo2l	Q8BWB1	0.00219309	MI_IZ_vs_MI_remote
-0.582321	13.9157	-3.91246	0.0022046	0.0193224	-1.5138	Vwa8	Q8CC88	0.0022046	MI_IZ_vs_MI_remote
0.469354	12.3202	3.91514	0.00219415	0.0193224	-1.50906	Tmod3	Q9JHJ0	0.00219415	MI_IZ_vs_MI_remote
-0.991936	14.0798	-3.91337	0.00220103	0.0193224	-1.51218	Tuba8	Q9JJZ2	0.00220103	MI_IZ_vs_MI_remote
0.449091	13.3363	3.90872	0.00221925	0.0194016	-1.52041	1700009N14Rik;Ran;Rasl2-9	Q61820;P62827;Q14AA6	0.00221925	MI_IZ_vs_MI_remote
-0.512871	12.9634	-3.89188	0.00228651	0.0195454	-1.55018	Lmo7	E9PYF4	0.00228651	MI_IZ_vs_MI_remote
0.653358	11.1532	3.8919	0.00228642	0.0195454	-1.55013	Nup153	E9Q3G8	0.00228642	MI_IZ_vs_MI_remote
1.12707	11.7143	3.89533	0.00227253	0.0195454	-1.54406	Spta1	P08032	0.00227253	MI_IZ_vs_MI_remote
0.782404	12.4338	3.89229	0.00228485	0.0195454	-1.54945	Capza1	P47753	0.00228485	MI_IZ_vs_MI_remote
-0.877986	14.0303	-3.99371	0.00227777	0.0195454	-1.44124	Actg2	P63268	0.00227777	MI_IZ_vs_MI_remote
-0.575005	13.8816	-3.89547	0.00227198	0.0195454	-1.54382	Prkaca;Prkacb	P68181;P05132	0.00227198	MI_IZ_vs_MI_remote
0.528252	13.8525	3.9006	0.00225143	0.0195454	-1.53476	Snd1	Q78PY7	0.00225143	MI_IZ_vs_MI_remote
-0.646674	14.8395	-3.8939	0.00227832	0.0195454	-1.5466	Col6a6	Q8C6K9	0.00227832	MI_IZ_vs_MI_remote
-0.470766	12.3997	-3.89811	0.00226137	0.0195454	-1.53916	Txlnb	Q8VBT1	0.00226137	MI_IZ_vs_MI_remote
0.766673	12.1437	3.8837	0.0023199	0.0197384	-1.56463	Snrpf	P62307	0.0023199	MI_IZ_vs_MI_remote
-0.808751	15.338	-3.88356	0.00232049	0.0197384	-1.56488	Hspb6	Q5EBG6	0.00232049	MI_IZ_vs_MI_remote
0.898101	13.4156	3.88002	0.00233511	0.0198141	-1.57114	Xirp2	Q4U4S6	0.00233511	MI_IZ_vs_MI_remote
-0.698133	19.5127	-3.87295	0.0023646	0.0200153	-1.58366	Slc25a3	Q8VEM8	0.0023646	MI_IZ_vs_MI_remote
-0.768979	16.0846	-3.86498	0.00239832	0.0202511	-1.59776	Myh1;Myh13;Myh2;Myh3;Myh4;Myh6;Myh7	Q91Z83;B1AR69;G3UW82;Q02566;P13541;Q5SX39;Q5SX40	0.00239832	MI_IZ_vs_MI_remote
1.11722	10.9961	4.45301	0.00243741	0.0204813	-1.25313	Klkb1	P26262	0.00243741	MI_IZ_vs_MI_remote
-0.827744	10.0081	-4.76353	0.00243232	0.0204813	-1.09599	Fads3	Q9JJE7	0.00243232	MI_IZ_vs_MI_remote
-0.593834	13.6888	-3.85352	0.00244763	0.0205174	-1.61805	Ndufaf4	Q9D1H6	0.00244763	MI_IZ_vs_MI_remote
-0.600404	17.3613	-3.85151	0.0024564	0.0205412	-1.62161	H1-0	P10922	0.0024564	MI_IZ_vs_MI_remote
-0.601777	15.401	-3.84701	0.00247616	0.0206415	-1.62959	Dsp	E9Q557	0.00247616	MI_IZ_vs_MI_remote
0.429008	12.7015	3.84606	0.00248032	0.0206415	-1.63127	Cdk1;Cdk12;Cdk13;Cdk14;Cdk15;Cdk16;Cdk17;Cdk18;Cdk2;Cdk3;Cdk4;Cdk5;Cdk6;Cdk9	P30285;P11440;Q99J95;P49615;Q3V3A1;Q69ZA1;Q14AX6;Q64261;Q04735;Q04899;P97377;Q8K0D0;Q80YP0;O35495	0.00248032	MI_IZ_vs_MI_remote
0.893688	13.3537	3.84444	0.0024875	0.0206516	-1.63415	Ptbp1;Ptbp3	P17225;Q8BHD7	0.0024875	MI_IZ_vs_MI_remote
-0.772312	13.1952	-3.83178	0.00254416	0.0206825	-1.65659	Mtnd1	P03888	0.00254416	MI_IZ_vs_MI_remote
-1.03918	15.7225	-3.83159	0.00254499	0.0206825	-1.65691	Mtatp8	P03930	0.00254499	MI_IZ_vs_MI_remote
0.621557	13.071	3.83389	0.00253459	0.0206825	-1.65283	Gnai1;Gnai2;Gnai3;Gnat1;Gnat2;Gnat3	P08752;Q3V3I2;Q9DC51;B2RSH2;P20612;P50149	0.00253459	MI_IZ_vs_MI_remote
0.704637	11.9021	3.839	0.00251165	0.0206825	-1.64377	Gpx1	P11352	0.00251165	MI_IZ_vs_MI_remote
-0.589954	20.1329	-3.83773	0.00251735	0.0206825	-1.64603	Myl2	P51667	0.00251735	MI_IZ_vs_MI_remote
0.43889	12.346	3.83413	0.00253355	0.0206825	-1.65242	Ruvbl1	P60122	0.00253355	MI_IZ_vs_MI_remote
-0.438046	15.7928	-3.83734	0.00251908	0.0206825	-1.64672	Lama2	Q60675	0.00251908	MI_IZ_vs_MI_remote
2.13447	13.3542	4.21587	0.00250973	0.0206825	-1.4091	Cd177	Q8R2S8	0.00250973	MI_IZ_vs_MI_remote
0.44804	13.247	3.83328	0.00253738	0.0206825	-1.65393	Eif2s3x;Eif2s3y	Q9Z0N1;Q9Z0N2	0.00253738	MI_IZ_vs_MI_remote
-0.750861	11.7794	-3.82933	0.00255528	0.0207175	-1.66093	Timm22	Q9CQ85	0.00255528	MI_IZ_vs_MI_remote
-0.511376	13.7399	-3.82736	0.00256424	0.0207416	-1.66442	Atp12a;Atp1a2;Atp1a3;Atp1a4	Q9WV27;Q9Z1W8;Q6PIC6;Q6PIE5	0.00256424	MI_IZ_vs_MI_remote
-0.515682	12.7735	-3.82447	0.00257748	0.0208001	-1.66955	S100a1	P56565	0.00257748	MI_IZ_vs_MI_remote
-0.649827	14.7488	-3.81418	0.00262513	0.0208122	-1.68779	Dpysl3	Q62188	0.00262513	MI_IZ_vs_MI_remote
-0.414253	13.2484	-3.81457	0.00262333	0.0208122	-1.68711	Gk;Gk2	Q64516;Q9WU65	0.00262333	MI_IZ_vs_MI_remote
0.579915	12.4457	3.81605	0.00261641	0.0208122	-1.68448	Nop58	Q6DFW4	0.00261641	MI_IZ_vs_MI_remote
-0.605275	15.8944	-3.81377	0.00262707	0.0208122	-1.68853	Slc25a12	Q8BH59	0.00262707	MI_IZ_vs_MI_remote
0.501103	11.8167	3.81812	0.00260676	0.0208122	-1.6808	NARS1	Q8BP47	0.00260676	MI_IZ_vs_MI_remote
-0.488691	13.8921	-3.81958	0.00260002	0.0208122	-1.67822	Afg3l2	Q8JZQ2	0.00260002	MI_IZ_vs_MI_remote
-0.40482	14.1987	-3.81916	0.00260193	0.0208122	-1.67895	Fam136a	Q9CR98	0.00260193	MI_IZ_vs_MI_remote
0.817305	11.5661	3.81534	0.00261974	0.0208122	-1.68574	Gnai3	Q9DC51	0.00261974	MI_IZ_vs_MI_remote
0.469885	12.849	3.81171	0.00263671	0.0208409	-1.69218	Hyou1	Q9JKR6	0.00263671	MI_IZ_vs_MI_remote
1.48386	11.8782	3.80782	0.00265504	0.020938	-1.69907	Fermt3	Q8K1B8	0.00265504	MI_IZ_vs_MI_remote
-0.52952	12.9142	-3.80041	0.00269033	0.021168	-1.71222	Rmdn1	Q9DCV4	0.00269033	MI_IZ_vs_MI_remote
-0.770595	18.701	-3.7926	0.00272808	0.0213602	-1.7261	Acta1;Acta2;Actc1	P62737;P68134;P68033	0.00272808	MI_IZ_vs_MI_remote
0.721146	13.6752	3.79027	0.00273944	0.0213602	-1.73023	Gm6525;Rpl36a;Rpl36a-ps1	P83882;A0A0A6YW33;A0A2I3BPG9	0.00273944	MI_IZ_vs_MI_remote
-0.759474	14.8287	-3.79119	0.00273493	0.0213602	-1.72859	Nebl	Q0II04	0.00273493	MI_IZ_vs_MI_remote
-1.193	13.3551	-3.79394	0.00272156	0.0213602	-1.72371	Fmo2	Q8K2I3	0.00272156	MI_IZ_vs_MI_remote
-0.66045	15.9307	-3.78307	0.00277485	0.0215877	-1.74302	Mpc1	P63030	0.00277485	MI_IZ_vs_MI_remote
-0.621254	12.5314	-3.87366	0.00278587	0.0216249	-1.64212	Trim54;Trim55	G3X8Y1;Q9ERP3	0.00278587	MI_IZ_vs_MI_remote
-0.58546	16.3287	-3.77474	0.00281641	0.021813	-1.75781	Atp5if1	O35143	0.00281641	MI_IZ_vs_MI_remote
-0.603927	14.7873	-3.77035	0.00283858	0.0218868	-1.76562	Bgn;Dcn	P28654;P28653	0.00283858	MI_IZ_vs_MI_remote
0.655533	12.7426	3.77096	0.00283546	0.0218868	-1.76452	Rcc1	Q8VE37	0.00283546	MI_IZ_vs_MI_remote
1.53253	12.0399	4.33012	0.00285494	0.021964	-1.38097	Fmnl1	Q9JL26	0.00285494	MI_IZ_vs_MI_remote
1.95326	12.6697	4.12005	0.00288046	0.0220135	-1.47092	Ptprc	P06800	0.00288046	MI_IZ_vs_MI_remote
-0.590436	14.5035	-3.76308	0.00287565	0.0220135	-1.77853	Ndufa3	Q9CQ91	0.00287565	MI_IZ_vs_MI_remote
-0.865343	14.9039	-3.76453	0.00286822	0.0220135	-1.77595	Prelp	Q9JK53	0.00286822	MI_IZ_vs_MI_remote
0.527246	13.3964	3.75763	0.0029038	0.0220944	-1.78822	Khsrp	Q3U0V1	0.0029038	MI_IZ_vs_MI_remote
-0.915293	10.9928	-4.31731	0.00290274	0.0220944	-1.28509	Abhd10	Q6PE15	0.00290274	MI_IZ_vs_MI_remote
0.406455	15.6486	3.75093	0.00293876	0.022262	-1.80013	Rps6	P62754	0.00293876	MI_IZ_vs_MI_remote
-0.523233	13.9268	-3.75168	0.00293483	0.022262	-1.7988	Atp1a2	Q6PIE5	0.00293483	MI_IZ_vs_MI_remote
0.671118	11.2404	3.74972	0.00294512	0.022262	-1.80228	Naga	Q9QWR8	0.00294512	MI_IZ_vs_MI_remote
-0.859825	14.0653	-3.74774	0.00295559	0.0222925	-1.80581	Myh1;Myh2;Myh3;Myh4;Myh6;Myh7;Myh7b;Myh8	Q91Z83;G3UW82;Q02566;P13541;Q5SX39;P13542;A2AQP0;Q5SX40	0.00295559	MI_IZ_vs_MI_remote
-0.71699	16.5347	-3.74561	0.00296685	0.0223043	-1.80959	Sccpdh	Q8R127	0.00296685	MI_IZ_vs_MI_remote
0.476757	12.5755	3.74501	0.00297003	0.0223043	-1.81066	Sf3b1	Q99NB9	0.00297003	MI_IZ_vs_MI_remote
0.801748	14.4061	3.7401	0.00299626	0.0224525	-1.81941	Tagln2;Tagln3	Q9R1Q8;Q9WVA4	0.00299626	MI_IZ_vs_MI_remote
-0.485199	12.5936	-3.73456	0.00302607	0.0225781	-1.82925	Lars2	Q8VDC0	0.00302607	MI_IZ_vs_MI_remote
1.50281	11.6879	4.28534	0.00302594	0.0225781	-1.47275	Npm3	Q9CPP0	0.00302594	MI_IZ_vs_MI_remote
0.880806	20.9044	3.73274	0.00303596	0.0226032	-1.8325	H3-3b;H3-5;H3c11;H3c15;H3f4	A0A8I4SYN6;P84244;P02301;P84228;P68433	0.00303596	MI_IZ_vs_MI_remote
0.932967	12.1513	4.08038	0.00305071	0.0226157	-1.60708	Pcna	P17918	0.00305071	MI_IZ_vs_MI_remote
0.92725	13.7402	3.73058	0.00304768	0.0226157	-1.83633	Cfl1;Cfl2	P18760;P45591	0.00304768	MI_IZ_vs_MI_remote
1.13085	10.2301	3.92752	0.00307797	0.0227691	-1.73995	Kpna2	P52293	0.00307797	MI_IZ_vs_MI_remote
0.464593	13.5817	3.7221	0.00309429	0.022841	-1.85143	Rpl17	Q9CPR4	0.00309429	MI_IZ_vs_MI_remote
1.07679	11.712	3.91959	0.0031168	0.0229095	-1.69747	Selenop	P70274	0.0031168	MI_IZ_vs_MI_remote
0.626213	12.0822	3.71813	0.0031164	0.0229095	-1.85851	Ssrp1	Q08943	0.0031164	MI_IZ_vs_MI_remote
0.549694	14.6801	3.71057	0.00315884	0.0229482	-1.87196	Txn	P10639	0.00315884	MI_IZ_vs_MI_remote
0.521085	13.0586	3.71084	0.00315729	0.0229482	-1.87147	Snrpd3	P62320	0.00315729	MI_IZ_vs_MI_remote
-0.616908	15.9487	-3.71037	0.00315996	0.0229482	-1.87231	Myom1	Q62234	0.00315996	MI_IZ_vs_MI_remote
0.623365	11.6882	3.71343	0.0031427	0.0229482	-1.86686	Larp1	Q6ZQ58	0.0031427	MI_IZ_vs_MI_remote
-0.510075	14.2962	-3.71514	0.00313312	0.0229482	-1.86383	Lonp1	Q8CGK3	0.00313312	MI_IZ_vs_MI_remote
0.913959	10.5458	3.71004	0.00316184	0.0229482	-1.8729	Rp2	Q9EPK2	0.00316184	MI_IZ_vs_MI_remote
-0.639847	12.2886	-3.77094	0.00331415	0.0239898	-1.81513	Gpsm1	Q6IR34	0.00331415	MI_IZ_vs_MI_remote
-0.798259	17.5048	-3.68294	0.00331921	0.0239898	-1.92118	Pygb;Pygl;Pygm	Q9ET01;Q9WUB3;Q8CI94	0.00331921	MI_IZ_vs_MI_remote
0.379064	14.9006	3.68088	0.00333151	0.0240285	-1.92486	Rps3	P62908	0.00333151	MI_IZ_vs_MI_remote
-0.596124	13.6642	-3.67925	0.00334128	0.0240489	-1.92777	Asph	Q8BSY0	0.00334128	MI_IZ_vs_MI_remote
-0.829149	19.7733	-3.6707	0.00339291	0.0243194	-1.943	Tnnt2	P50752	0.00339291	MI_IZ_vs_MI_remote
0.641095	11.6462	3.67086	0.00339193	0.0243194	-1.94271	Tubb3;Tubb6	Q922F4;Q9ERD7	0.00339193	MI_IZ_vs_MI_remote
0.643551	11.4477	3.66629	0.00341988	0.0243926	-1.95087	H2bc14;H2bc8;H2bc9;Hist2h2bb	P10854;Q64525;Q6ZWY9;Q64478	0.00341988	MI_IZ_vs_MI_remote
-0.593044	19.1937	-3.66499	0.00342787	0.0243926	-1.95319	Tpm1;Tpm3	P58771;P21107	0.00342787	MI_IZ_vs_MI_remote
2.04977	12.0077	3.7516	0.00342472	0.0243926	-1.84781	Dsg1a;Dsg1b	Q61495;Q7TSF1	0.00342472	MI_IZ_vs_MI_remote
1.29434	12.4251	3.66443	0.00343132	0.0243926	-1.95418	Itih3	Q61704	0.00343132	MI_IZ_vs_MI_remote
0.487809	13.467	3.65839	0.00346869	0.0245074	-1.96495	Akap2	O54931	0.00346869	MI_IZ_vs_MI_remote
-0.675919	12.7665	-3.65923	0.00346348	0.0245074	-1.96345	Bckdk	O55028	0.00346348	MI_IZ_vs_MI_remote
0.434902	11.8269	3.65863	0.00346719	0.0245074	-1.96452	Flii	Q9JJ28	0.00346719	MI_IZ_vs_MI_remote
-0.400138	12.6801	-3.65403	0.00349596	0.0246497	-1.97272	Myh14	Q6URW6	0.00349596	MI_IZ_vs_MI_remote
0.659326	11.9845	3.73786	0.00350561	0.0246526	-1.87104	Adh1	P00329	0.00350561	MI_IZ_vs_MI_remote
-0.601512	13.8642	-3.65171	0.00351061	0.0246526	-1.97688	Ppp1r12b	Q8BG95	0.00351061	MI_IZ_vs_MI_remote
0.619333	12.1246	3.73549	0.00351976	0.0246668	-1.87505	Ctbp2	P56546	0.00351976	MI_IZ_vs_MI_remote
-0.514486	12.0357	-3.64295	0.00356624	0.0248918	-1.99249	Rab3a	P63011	0.00356624	MI_IZ_vs_MI_remote
-0.758612	16.4566	-3.64309	0.00356539	0.0248918	-1.99225	Ndufv2	Q9D6J6	0.00356539	MI_IZ_vs_MI_remote
1.55193	12.0614	3.96768	0.00359572	0.0250471	-1.77371	Cybb	Q61093	0.00359572	MI_IZ_vs_MI_remote
0.742066	12.8333	3.63602	0.00361098	0.0251028	-2.00487	Cyfip1;Cyfip2	Q5SQX6;Q7TMB8	0.00361098	MI_IZ_vs_MI_remote
0.562027	14.3686	3.63025	0.0036486	0.0252629	-2.01516	Rap1a;Rap1b	P62835;Q99JI6	0.0036486	MI_IZ_vs_MI_remote
-0.820037	12.1374	-3.82041	0.00364794	0.0252629	-1.80945	Ehd2;Ehd4	Q9EQP2;Q8BH64	0.00364794	MI_IZ_vs_MI_remote
-0.534385	13.5017	-3.6241	0.00368918	0.0254929	-2.02614	Endog	O08600	0.00368918	MI_IZ_vs_MI_remote
-0.705251	15.8281	-3.62242	0.00370036	0.0255192	-2.02915	Atp5mg;Gm5426	J3QNM7;Q9CPQ8	0.00370036	MI_IZ_vs_MI_remote
1.71311	12.4993	4.12335	0.00374398	0.0257402	-1.62527	Blk;Cdk20;Cilk1;Fgfr1;Fgfr2;Fgfr3;Fgfr4;Fgr;Fyn;Hck;Lck;Lyn;Mak;Yes1	P16092;Q04736;Q61851;Q9JHU3;Q04859;P14234;P06240;P25911;P39688;Q03142;P21803;Q9JKV2;P08103;P16277	0.00374398	MI_IZ_vs_MI_remote
-0.512697	12.5236	-3.61542	0.00374727	0.0257402	-2.04165	Lclat1	Q3UN02	0.00374727	MI_IZ_vs_MI_remote
-0.856834	14.1424	-3.61138	0.0037746	0.0258765	-2.04886	Slc2a4	P14142	0.0037746	MI_IZ_vs_MI_remote
-0.788474	13.1983	-3.60978	0.00378549	0.0258999	-2.05172	Chchd2;Zbed5	Q9D1L0;B2RPU8	0.00378549	MI_IZ_vs_MI_remote
-0.614255	14.6955	-3.60098	0.00384595	0.0262617	-2.06744	Aldh1a1;Aldh1a2;Aldh1a3;Aldh1a7;Aldh1b1;Aldh2	Q62148;Q9CZS1;P47738;Q9JHW9;O35945;P24549	0.00384595	MI_IZ_vs_MI_remote
-0.581979	13.4808	-3.59932	0.00385742	0.0262882	-2.0704	Sgca	P82350	0.00385742	MI_IZ_vs_MI_remote
0.388868	14.7808	3.59147	0.00391235	0.0264081	-2.08443	Rpl26	P61255	0.00391235	MI_IZ_vs_MI_remote
0.531054	13.17	3.59264	0.00390408	0.0264081	-2.08233	Snrpd2	P62317	0.00390408	MI_IZ_vs_MI_remote
0.356612	15.0428	3.5951	0.00388684	0.0264081	-2.07794	Rps3a	P97351	0.00388684	MI_IZ_vs_MI_remote
-0.733529	13.3677	-3.67277	0.00391657	0.0264081	-1.98132	Col14a1	Q80X19	0.00391657	MI_IZ_vs_MI_remote
0.56243	13.9735	3.59027	0.00392078	0.0264081	-2.08656	Nono	Q99K48	0.00392078	MI_IZ_vs_MI_remote
0.440692	14.0736	3.59202	0.00390851	0.0264081	-2.08345	Rpl11	Q9CXW4	0.00390851	MI_IZ_vs_MI_remote
0.509189	14.0609	3.58743	0.0039409	0.0264738	-2.09164	Clic4	Q9QYB1	0.0039409	MI_IZ_vs_MI_remote
0.436585	13.6701	3.58674	0.00394584	0.0264738	-2.09288	Gm7324;Rbmx;Rbmxl1	Q9WV02;Q91VM5;A0A2I3BRL8	0.00394584	MI_IZ_vs_MI_remote
-0.650217	16.3183	-3.58564	0.00395362	0.0264747	-2.09484	Myom2	Q14BI5	0.00395362	MI_IZ_vs_MI_remote
-0.495961	13.9634	-3.58328	0.00397047	0.0264992	-2.09905	Lrpprc	Q6PB66	0.00397047	MI_IZ_vs_MI_remote
-0.452483	13.5722	-3.58299	0.00397258	0.0264992	-2.09958	Palld	Q9ET54	0.00397258	MI_IZ_vs_MI_remote
0.554942	12.4999	3.58021	0.0039925	0.0265809	-2.10454	Kctd12	Q6WVG3	0.0039925	MI_IZ_vs_MI_remote
-0.729235	14.4674	-3.57525	0.0040284	0.0267683	-2.11342	Micos10	Q7TNS2	0.0040284	MI_IZ_vs_MI_remote
-0.431422	12.6583	-3.57037	0.00406399	0.0269016	-2.12214	Cluh	Q5SW19	0.00406399	MI_IZ_vs_MI_remote
0.990533	11.6937	4.31346	0.00405813	0.0269016	-1.61054	Aldh1a2;Aldh1a3	Q62148;Q9JHW9	0.00405813	MI_IZ_vs_MI_remote
-0.558259	16.2816	-3.56804	0.00408107	0.0269117	-2.1263	Slc25a5	P51881	0.00408107	MI_IZ_vs_MI_remote
0.362989	13.8011	3.56882	0.00407535	0.0269117	-2.12491	Rpl4	Q9D8E6	0.00407535	MI_IZ_vs_MI_remote
0.481995	13.493	3.56473	0.00410553	0.0270216	-2.13223	Fgl2	P12804	0.00410553	MI_IZ_vs_MI_remote
-0.629774	14.076	-3.56	0.00414066	0.0270626	-2.14068	Myh15	E9Q264	0.00414066	MI_IZ_vs_MI_remote
-0.583547	14.5226	-3.56251	0.00412198	0.0270626	-2.13619	Dpysl2	O08553	0.00412198	MI_IZ_vs_MI_remote
0.43266	18.6311	3.56167	0.00412823	0.0270626	-2.13769	Gm8797;Rps27a;Uba52;Ubb;Ubc	P0CG49;P62984;P62983;A0A0A6YW67;P0CG50	0.00412823	MI_IZ_vs_MI_remote
-0.510289	12.6844	-3.63842	0.00415323	0.0270626	-2.03965	Slc30a9	Q5IRJ6	0.00415323	MI_IZ_vs_MI_remote
0.705075	12.2181	3.5576	0.00415867	0.0270626	-2.14498	Dek	Q7TNV0	0.00415867	MI_IZ_vs_MI_remote
0.739336	11.4558	3.55782	0.00415699	0.0270626	-2.14458	Zmpste24	Q80W54	0.00415699	MI_IZ_vs_MI_remote
2.15809	13.1728	3.86308	0.004195	0.0272479	-1.92988	Itgam	P05555	0.004195	MI_IZ_vs_MI_remote
0.438693	14.784	3.55169	0.00420325	0.0272503	-2.15555	Rpl7	P14148	0.00420325	MI_IZ_vs_MI_remote
-0.554859	12.5792	-3.54821	0.00422971	0.0273706	-2.16177	Sdhd	Q9CXV1	0.00422971	MI_IZ_vs_MI_remote
0.595549	12.1247	3.54651	0.0042427	0.0274034	-2.16481	Atp6v1g1	Q9CR51	0.0042427	MI_IZ_vs_MI_remote
2.40407	11.6576	4.27376	0.00425161	0.0274098	-1.57844	Pyhin1	Q8BV49	0.00425161	MI_IZ_vs_MI_remote
-0.710888	14.3011	-3.54142	0.00428184	0.0275534	-2.17391	Naca	P70670	0.00428184	MI_IZ_vs_MI_remote
-0.449127	11.9812	-3.53747	0.00431252	0.0276993	-2.18098	Supv3l1	Q80YD1	0.00431252	MI_IZ_vs_MI_remote
0.803966	12.8775	3.53363	0.00434247	0.0277373	-2.18784	Mug1;Mug2	P28665;P28666	0.00434247	MI_IZ_vs_MI_remote
0.577062	13.6465	3.53404	0.00433925	0.0277373	-2.18711	Trim28	Q62318	0.00433925	MI_IZ_vs_MI_remote
-0.45327	13.5567	-3.53377	0.00434141	0.0277373	-2.1876	Letm1	Q9Z2I0	0.00434141	MI_IZ_vs_MI_remote
-0.466979	15.6853	-3.53225	0.00435331	0.0277554	-2.19031	Atp12a;Atp1a1;Atp1a2;Atp1a3;Atp1a4;Atp4a	Q9WV27;Q8VDN2;Q9Z1W8;Q6PIC6;Q64436;Q6PIE5	0.00435331	MI_IZ_vs_MI_remote
0.602884	12.6659	3.52846	0.00438319	0.0278418	-2.19709	Ssb	P32067	0.00438319	MI_IZ_vs_MI_remote
0.469783	13.5262	3.52748	0.00439099	0.0278418	-2.19885	Hmgb1	P63158	0.00439099	MI_IZ_vs_MI_remote
-0.582446	11.9663	-3.60746	0.00437922	0.0278418	-2.0923	Tfrc	Q62351	0.00437922	MI_IZ_vs_MI_remote
-0.553354	12.7258	-3.52472	0.0044129	0.0279296	-2.20378	Perm1	Q149B8	0.0044129	MI_IZ_vs_MI_remote
-0.711012	12.2238	-3.5217	0.00443706	0.0280312	-2.20919	Trim54;Trim55;Trim63	Q38HM4;G3X8Y1;Q9ERP3	0.00443706	MI_IZ_vs_MI_remote
0.387364	12.7055	3.52034	0.00444797	0.028049	-2.21162	Hsph1	Q61699	0.00444797	MI_IZ_vs_MI_remote
1.78074	10.5991	4.59163	0.00448392	0.0282242	-1.52368	Me2	Q99KE1	0.00448392	MI_IZ_vs_MI_remote
-0.562173	12.3144	-3.59188	0.00449773	0.0282598	-2.11882	Tha1	Q6XPS7	0.00449773	MI_IZ_vs_MI_remote
0.822911	13.3191	3.51205	0.00451511	0.0282793	-2.22646	F2	P19221	0.00451511	MI_IZ_vs_MI_remote
-0.429957	13.313	-3.5118	0.00451718	0.0282793	-2.22692	Atad1	Q9D5T0	0.00451718	MI_IZ_vs_MI_remote
-0.538932	17.6036	-3.51033	0.00452916	0.0283031	-2.22954	Col6a2	Q02788	0.00452916	MI_IZ_vs_MI_remote
-0.819151	18.5664	-3.50862	0.0045432	0.028329	-2.2326	Tnni3	P48787	0.0045432	MI_IZ_vs_MI_remote
0.442259	12.2814	3.50783	0.00454966	0.028329	-2.23401	Coro1c	Q9WUM4	0.00454966	MI_IZ_vs_MI_remote
0.507557	13.7279	3.4975	0.00463546	0.0287783	-2.25251	Sri	Q6P069	0.00463546	MI_IZ_vs_MI_remote
0.735946	12.8309	3.49504	0.00465609	0.0287783	-2.25691	Sun2	Q8BJS4	0.00465609	MI_IZ_vs_MI_remote
-0.419903	13.142	-3.49414	0.00466365	0.0287783	-2.25851	Nceh1	Q8BLF1	0.00466365	MI_IZ_vs_MI_remote
0.76599	11.4887	3.78945	0.00468001	0.0287783	-1.99446	C8a	Q8K182	0.00468001	MI_IZ_vs_MI_remote
-0.632547	15.8885	-3.49546	0.00465259	0.0287783	-2.25616	Ndufc2	Q9CQ54	0.00465259	MI_IZ_vs_MI_remote
0.492556	12.1049	3.49241	0.00467834	0.0287783	-2.26163	Nop56	Q9D6Z1	0.00467834	MI_IZ_vs_MI_remote
0.987626	10.8799	3.66636	0.00466924	0.0287783	-2.10296	Brd3;Brd4	Q9ESU6;Q8K2F0	0.00466924	MI_IZ_vs_MI_remote
-0.590277	13.3719	-3.48729	0.00472182	0.0289326	-2.27079	Entpd2	O55026	0.00472182	MI_IZ_vs_MI_remote
0.420849	12.5694	3.48753	0.00471976	0.0289326	-2.27035	Cdc42	P60766	0.00471976	MI_IZ_vs_MI_remote
-0.546812	15.3339	-3.48365	0.00475307	0.0290214	-2.27731	Acsl1;Acsl5	P41216;Q8JZR0	0.00475307	MI_IZ_vs_MI_remote
-0.664391	15.0117	-3.48419	0.00474841	0.0290214	-2.27634	Fxyd1	Q9Z239	0.00474841	MI_IZ_vs_MI_remote
-0.800546	16.4203	-3.48194	0.00476775	0.0290598	-2.28037	Ndufb8	Q9D6J5	0.00476775	MI_IZ_vs_MI_remote
1.47207	11.8765	3.94162	0.00477634	0.029061	-1.89988	Inpp5d	Q9ES52	0.00477634	MI_IZ_vs_MI_remote
-0.611352	17.4538	-3.46476	0.00491832	0.029247	-2.31114	Ttn	A2ASS6	0.00491832	MI_IZ_vs_MI_remote
-0.657184	18.3903	-3.47579	0.00482112	0.029247	-2.29138	Mybpc3	O70468	0.00482112	MI_IZ_vs_MI_remote
-0.619289	18.9283	-3.4628	0.00493585	0.029247	-2.31466	Myl1;Myl3	P09542;P05977	0.00493585	MI_IZ_vs_MI_remote
-0.954954	14.0828	-3.53683	0.00494363	0.029247	-2.27167	Crmp1;Dpysl2	P97427;O08553	0.00494363	MI_IZ_vs_MI_remote
0.399029	14.3248	3.46023	0.00495885	0.029247	-2.31925	Rps5	P97461	0.00495885	MI_IZ_vs_MI_remote
0.799461	9.47202	3.63977	0.00487394	0.029247	-2.05811	Luc7l3	Q5SUF2	0.00487394	MI_IZ_vs_MI_remote
-0.560771	15.5965	-3.46022	0.00495898	0.029247	-2.31928	Pdhx	Q8BKZ9	0.00495898	MI_IZ_vs_MI_remote
0.90675	12.2566	3.63379	0.0049212	0.029247	-2.15559	Plcg2	Q8CIH5	0.0049212	MI_IZ_vs_MI_remote
-0.883463	11.7449	-3.63871	0.00488225	0.029247	-2.05979	Uqcc3	Q8K2T4	0.00488225	MI_IZ_vs_MI_remote
0.578013	15.1874	3.46804	0.00488919	0.029247	-2.30526	Hnrnpu	Q8VEK3	0.00488919	MI_IZ_vs_MI_remote
-0.80907	18.3068	-3.46047	0.00495667	0.029247	-2.31882	Myh1;Myh2;Myh4;Myh6;Myh7;Myh8	Q91Z83;G3UW82;Q02566;Q5SX39;P13542;Q5SX40	0.00495667	MI_IZ_vs_MI_remote
-0.675132	15.8743	-3.4704	0.0048684	0.029247	-2.30104	Ndufb4	Q9CQC7	0.0048684	MI_IZ_vs_MI_remote
-0.643875	18.2647	-3.47064	0.00486622	0.029247	-2.3006	Cyc1	Q9D0M3	0.00486622	MI_IZ_vs_MI_remote
0.382498	14.2705	3.46935	0.00487765	0.029247	-2.30292	Rpl34	Q9D1R9	0.00487765	MI_IZ_vs_MI_remote
-0.549117	11.7433	-3.54312	0.00489045	0.029247	-2.20191	Tmod1;Tmod4	Q9JLH8;P49813	0.00489045	MI_IZ_vs_MI_remote
0.54839	12.1623	3.47135	0.00485999	0.029247	-2.29933	4930544G11Rik;Rhoa;Rhoc	Q9QUI0;Q9CR99;Q62159	0.00485999	MI_IZ_vs_MI_remote
-0.641111	12.4253	-3.46685	0.00489973	0.029247	-2.30739	Gyg1	Q9R062	0.00489973	MI_IZ_vs_MI_remote
-0.729454	15.1999	-3.46382	0.00492668	0.029247	-2.31282	Atp1a1;Atp1a2;Atp1a3;Atp1a4	Q9WV27;Q8VDN2;Q6PIC6;Q6PIE5	0.00492668	MI_IZ_vs_MI_remote
-0.410738	14.0123	-3.45768	0.00498178	0.0293315	-2.32382	Pgm5	Q8BZF8	0.00498178	MI_IZ_vs_MI_remote
-0.682055	16.1439	-3.4562	0.00499515	0.0293603	-2.32647	Ndufs2	Q91WD5	0.00499515	MI_IZ_vs_MI_remote
0.621916	11.3802	3.45223	0.00503118	0.0295219	-2.33358	Pak2	Q8CIN4	0.00503118	MI_IZ_vs_MI_remote
-0.768038	15.7627	-3.44873	0.00506321	0.0296596	-2.33985	Ndufa8	Q9DCJ5	0.00506321	MI_IZ_vs_MI_remote
-0.581132	20.9804	-3.44601	0.00508825	0.0297559	-2.34473	Atp5f1a	Q03265	0.00508825	MI_IZ_vs_MI_remote
1.38049	13.9625	3.6074	0.00513571	0.0299828	-2.25654	Tnc	Q80YX1	0.00513571	MI_IZ_vs_MI_remote
0.627154	12.3604	3.43962	0.00514745	0.0300008	-2.35617	Cpsf6	Q6NVF9	0.00514745	MI_IZ_vs_MI_remote
0.452374	13.7862	3.43698	0.00517216	0.0300941	-2.36091	Lasp1	Q61792	0.00517216	MI_IZ_vs_MI_remote
0.892281	19.9184	3.43445	0.00519593	0.0301312	-2.36544	H2bc1;H2bc12;H2bc14;H2bc15;H2bc3;H2bc8;H2bc9;Hist1h2bp;Hist2h2bb	P10854;Q64525;Q64475;Q6ZWY9;P70696;Q64478;Q8CGP2;P10853;Q8CGP1	0.00519593	MI_IZ_vs_MI_remote
1.30315	9.96074	4.10566	0.00519217	0.0301312	-1.85951	Jpt1	P97825	0.00519217	MI_IZ_vs_MI_remote
0.379503	13.513	3.43075	0.00523088	0.0302765	-2.37207	D1Pas1;Ddx3x;Ddx3y	P16381;Q62095;Q62167	0.00523088	MI_IZ_vs_MI_remote
0.514204	12.5917	3.42995	0.00523848	0.0302765	-2.3735	Hrg	Q9ESB3	0.00523848	MI_IZ_vs_MI_remote
0.417665	11.5877	3.42775	0.00525939	0.0303467	-2.37744	Fubp3	Q3TIX6	0.00525939	MI_IZ_vs_MI_remote
0.687433	12.0165	3.4952	0.00531094	0.0305932	-2.28372	Ipo4	Q8VI75	0.00531094	MI_IZ_vs_MI_remote
-0.789495	11.5709	-3.5844	0.00533064	0.0306367	-2.14672	Camk2a	P11798	0.00533064	MI_IZ_vs_MI_remote
-0.618552	17.1548	-3.41976	0.0053362	0.0306367	-2.39177	Pdhb	Q9D051	0.0053362	MI_IZ_vs_MI_remote
-1.10511	12.5905	-3.41347	0.00539737	0.0309366	-2.40304	mt-Co3	P00416	0.00539737	MI_IZ_vs_MI_remote
1.28544	13.1244	3.48431	0.00541163	0.0309671	-2.30234	Ca2	P00920	0.00541163	MI_IZ_vs_MI_remote
-0.67266	18.8543	-3.41005	0.00543099	0.0310266	-2.40917	Atp2a1;Atp2a2	Q8R429;O55143	0.00543099	MI_IZ_vs_MI_remote
-0.618739	21.2508	-3.40904	0.005441	0.0310325	-2.41099	Myh6;Myh7	Q91Z83;Q02566	0.005441	MI_IZ_vs_MI_remote
-0.601574	20.9799	-3.40761	0.0054551	0.0310618	-2.41355	Slc25a31;Slc25a4;Slc25a5	Q3V132;P51881;P48962	0.0054551	MI_IZ_vs_MI_remote
-0.593502	18.0196	-3.40493	0.00548165	0.0311617	-2.41834	Uqcrfs1	Q9CR68	0.00548165	MI_IZ_vs_MI_remote
-0.462491	12.9603	-3.40238	0.00550711	0.0312551	-2.42292	Tfam	P40630	0.00550711	MI_IZ_vs_MI_remote
-0.603069	14.802	-3.40029	0.00552806	0.0312715	-2.42667	Fam210a	Q8BGY7	0.00552806	MI_IZ_vs_MI_remote
-0.688661	16.148	-3.40099	0.00552099	0.0312715	-2.42541	Cpt1b	Q924X2	0.00552099	MI_IZ_vs_MI_remote
1.42541	14.4677	3.39933	0.00553771	0.0312749	-2.4284	Clu	Q06890	0.00553771	MI_IZ_vs_MI_remote
-0.62583	11.3261	-3.39635	0.00556768	0.0313419	-2.43373	Obsl1	D3YYU8	0.00556768	MI_IZ_vs_MI_remote
-0.577398	15.7544	-3.39714	0.00555968	0.0313419	-2.43231	Coq9	Q8K1Z0	0.00555968	MI_IZ_vs_MI_remote
0.37528	12.4462	3.38971	0.0056352	0.0316706	-2.44563	Caprin1	Q60865	0.0056352	MI_IZ_vs_MI_remote
-0.754409	11.3312	-3.65692	0.00570927	0.0319313	-2.01061	0610012G03Rik	A0A0J9YTR2	0.00570927	MI_IZ_vs_MI_remote
-0.58353	12.0471	-3.4536	0.0057061	0.0319313	-2.35483	Acacb	E9Q4Z2	0.0057061	MI_IZ_vs_MI_remote
0.679288	12.519	3.38367	0.00569734	0.0319313	-2.45646	Cpne1	Q8C166	0.00569734	MI_IZ_vs_MI_remote
0.601263	13.6925	3.37888	0.00574714	0.0320913	-2.46505	D1Pas1;Ddx17;Ddx3x;Ddx3y;Ddx5	Q501J6;P16381;Q61656;Q62095;Q62167	0.00574714	MI_IZ_vs_MI_remote
1.05938	11.375	4.02018	0.00575699	0.0320945	-1.87236	Masp1	P98064	0.00575699	MI_IZ_vs_MI_remote
0.631281	11.5834	3.53315	0.00579326	0.0322448	-2.31881	Prkag1	O54950	0.00579326	MI_IZ_vs_MI_remote
-0.474023	12.9076	-3.3689	0.00585221	0.0325206	-2.48294	Dmd;Utrn	E9Q6R7;P11531	0.00585221	MI_IZ_vs_MI_remote
0.480563	13.5344	3.36385	0.00590611	0.0326108	-2.49199	Rpl21	O09167	0.00590611	MI_IZ_vs_MI_remote
0.374536	15.5876	3.36478	0.00589618	0.0326108	-2.49033	Rpl18	P35980	0.00589618	MI_IZ_vs_MI_remote
0.373173	16.1887	3.36395	0.00590504	0.0326108	-2.49181	Rpl6	P47911	0.00590504	MI_IZ_vs_MI_remote
-0.422286	13.9139	-3.43523	0.00589019	0.0326108	-2.38628	Myh10;Myh11	Q61879;O08638	0.00589019	MI_IZ_vs_MI_remote
0.51179	12.363	3.35776	0.00597184	0.0328486	-2.50291	Alyref;Alyref2	O08583;Q9JJW6	0.00597184	MI_IZ_vs_MI_remote
-0.652064	16.4542	-3.35723	0.00597764	0.0328486	-2.50387	Idh3g	P70404	0.00597764	MI_IZ_vs_MI_remote
0.555544	13.7157	3.35774	0.00597211	0.0328486	-2.50295	Rtn4	Q99P72	0.00597211	MI_IZ_vs_MI_remote
-0.669294	13.3062	-3.35341	0.00601925	0.0330248	-2.51071	Slc25a31	Q3V132	0.00601925	MI_IZ_vs_MI_remote
-0.758555	16.6402	-3.35131	0.00604224	0.0330985	-2.51447	Cox7a1	P56392	0.00604224	MI_IZ_vs_MI_remote
0.578868	12.9734	3.34914	0.00606611	0.0331244	-2.51836	Gm10320;Sec61b	E9PW43;Q9CQS8	0.00606611	MI_IZ_vs_MI_remote
-0.565296	13.6728	-3.34997	0.00605699	0.0331244	-2.51688	Coq7	P97478	0.00605699	MI_IZ_vs_MI_remote
0.400236	13.1485	3.34562	0.00610509	0.0332843	-2.52468	Psap	Q61207	0.00610509	MI_IZ_vs_MI_remote
-0.523802	12.3367	-3.34476	0.00611462	0.0332843	-2.52622	Mrpl18	Q9CQL5	0.00611462	MI_IZ_vs_MI_remote
0.652443	11.3763	3.34359	0.00612763	0.0333027	-2.52832	Fnbp1	Q80TY0	0.00612763	MI_IZ_vs_MI_remote
-0.826199	13.5499	-3.33846	0.00618512	0.0334418	-2.53753	Nr1h5	E9Q5A6	0.00618512	MI_IZ_vs_MI_remote
-0.699538	12.5935	-3.33951	0.00617328	0.0334418	-2.53564	Opa1;Tlr8	P58281;P58682	0.00617328	MI_IZ_vs_MI_remote
-0.577753	14.0589	-3.33791	0.0061913	0.0334418	-2.53851	Hhatl	Q9D1G3	0.0061913	MI_IZ_vs_MI_remote
-0.708583	16.7447	-3.33786	0.00619186	0.0334418	-2.5386	Pygm	Q9WUB3	0.00619186	MI_IZ_vs_MI_remote
0.562175	12.0875	3.33642	0.00620807	0.0334772	-2.54118	Slc3a2	P10852	0.00620807	MI_IZ_vs_MI_remote
0.492159	15.0325	3.33186	0.00625971	0.0337031	-2.54935	Srsf4;Srsf5;Srsf6	Q8VE97;Q3TWW8;O35326	0.00625971	MI_IZ_vs_MI_remote
-0.461687	12.7575	-3.32924	0.00628967	0.0338118	-2.55406	Pdlim3	O70209	0.00628967	MI_IZ_vs_MI_remote
1.25818	18.2358	3.32635	0.00632285	0.0338326	-2.55925	Hbb-b1;Hbb-b2;Hbb-bs	P02089;P02088;A8DUK4	0.00632285	MI_IZ_vs_MI_remote
0.710014	11.0032	3.39488	0.00631613	0.0338326	-2.45538	C5	P06684	0.00631613	MI_IZ_vs_MI_remote
0.374478	13.7043	3.32755	0.006309	0.0338326	-2.55708	Rpl13a	P19253	0.006309	MI_IZ_vs_MI_remote
-0.406163	11.8022	-3.32541	0.00633362	0.033838	-2.56092	Ppp1r12a;Ppp1r12b	Q9DBR7;Q8BG95	0.00633362	MI_IZ_vs_MI_remote
0.64015	15.1645	3.32333	0.00635767	0.0339141	-2.56466	Tgfbi	P82198	0.00635767	MI_IZ_vs_MI_remote
-1.00941	12.3766	-3.321	0.00638468	0.0340058	-2.56884	Rgs9bp	Q148R9	0.00638468	MI_IZ_vs_MI_remote
-0.589718	18.0859	-3.31982	0.00639836	0.0340263	-2.57095	Atp5pb	Q9CQQ7	0.00639836	MI_IZ_vs_MI_remote
2.20766	14.6081	3.31434	0.00646247	0.034168	-2.58078	2310050C09Rik	G5E8Z3	0.00646247	MI_IZ_vs_MI_remote
-0.582414	14.3966	-3.31333	0.00647435	0.034168	-2.58259	Ndufb1	P0DN34	0.00647435	MI_IZ_vs_MI_remote
0.487867	12.7742	3.31551	0.0064487	0.034168	-2.57867	Arf4	P61750	0.0064487	MI_IZ_vs_MI_remote
1.05392	10.5147	3.57782	0.00643554	0.034168	-2.36266	Soat1	Q61263	0.00643554	MI_IZ_vs_MI_remote
0.379084	12.953	3.31358	0.00647139	0.034168	-2.58214	Eif3f	Q9DCH4	0.00647139	MI_IZ_vs_MI_remote
0.444848	12.278	3.31204	0.0064896	0.0341962	-2.58491	Ighg1	P01869	0.0064896	MI_IZ_vs_MI_remote
-0.695768	18.8166	-3.3112	0.00649945	0.0341962	-2.5864	Ndufa4	Q62425	0.00649945	MI_IZ_vs_MI_remote
0.372037	13.1631	3.30916	0.00652365	0.034225	-2.59006	Eif2s2	Q99L45	0.00652365	MI_IZ_vs_MI_remote
-0.448007	12.8003	-3.30824	0.00653459	0.034225	-2.59171	Cops7a	Q9CZ04	0.00653459	MI_IZ_vs_MI_remote
0.414326	12.9175	3.30884	0.00652749	0.034225	-2.59064	Vars1	Q9Z1Q9	0.00652749	MI_IZ_vs_MI_remote
0.413863	15.9553	3.30348	0.00659144	0.0342295	-2.60025	Rpl23a	P62751	0.00659144	MI_IZ_vs_MI_remote
-0.933795	15.5098	-3.3032	0.00659477	0.0342295	-2.60075	Acta2;Actc1;Actg2	P63268;P62737;P68033	0.00659477	MI_IZ_vs_MI_remote
-0.981244	11.2218	-3.5639	0.00657316	0.0342295	-2.14618	Gja5	Q01231	0.00657316	MI_IZ_vs_MI_remote
-0.707809	16.2642	-3.30702	0.00654907	0.0342295	-2.5939	Ndufb2	Q9CPU2	0.00654907	MI_IZ_vs_MI_remote
0.520608	11.9577	3.30459	0.0065781	0.0342295	-2.59825	Cdc42;Rac1;Rac2;Rac3;Rhog;Rhoj;Rhoq	Q9ER71;Q8R527;P84096;P60766;P63001;P60764;Q05144	0.0065781	MI_IZ_vs_MI_remote
-0.579555	14.7443	-3.30514	0.00657158	0.0342295	-2.59728	Dpt	Q9QZZ6	0.00657158	MI_IZ_vs_MI_remote
0.356101	15.7221	3.29906	0.00664463	0.0343852	-2.60817	Rpl13	P47963	0.00664463	MI_IZ_vs_MI_remote
-0.763746	12.223	-3.36589	0.00664154	0.0343852	-2.50506	Gstt1	Q64471	0.00664154	MI_IZ_vs_MI_remote
-0.650269	16.119	-3.29783	0.00665958	0.0344111	-2.61038	Chchd3	Q9CRB9	0.00665958	MI_IZ_vs_MI_remote
-0.612648	14.1213	-3.2942	0.00670372	0.0345128	-2.61689	Coq10a	E9Q3H6	0.00670372	MI_IZ_vs_MI_remote
-0.461892	12.2306	-3.29376	0.00670916	0.0345128	-2.61769	Cspg4	Q8VHY0	0.00670916	MI_IZ_vs_MI_remote
-0.501623	12.2381	-3.29421	0.00670358	0.0345128	-2.61687	Fitm1	Q91V79	0.00670358	MI_IZ_vs_MI_remote
0.852373	11.9782	3.28492	0.00681792	0.0348717	-2.63353	Cfhr2;Cfhr4	A0A668KLU9;E9Q8B5	0.00681792	MI_IZ_vs_MI_remote
-0.522381	14.9162	-3.28653	0.00679805	0.0348717	-2.63065	Cox7a2	P48771	0.00679805	MI_IZ_vs_MI_remote
0.538252	14.912	3.28421	0.00682675	0.0348717	-2.6348	Hnrnpa3	Q8BG05	0.00682675	MI_IZ_vs_MI_remote
0.475404	12.5789	3.28602	0.00680438	0.0348717	-2.63157	Fubp1;Khsrp	Q91WJ8;Q3U0V1	0.00680438	MI_IZ_vs_MI_remote
-0.815931	11.3664	-3.34903	0.00683877	0.0348717	-2.53398	Myot	Q9JIF9	0.00683877	MI_IZ_vs_MI_remote
0.650209	14.5977	3.2832	0.00683937	0.0348717	-2.63662	Tagln2	Q9WVA4	0.00683937	MI_IZ_vs_MI_remote
-0.554815	13.1515	-3.27992	0.00688027	0.0350287	-2.64249	Sgcb	P82349	0.00688027	MI_IZ_vs_MI_remote
0.656563	12.8842	3.27796	0.00690499	0.0350514	-2.64602	Eif4a3;Eif4a3l1;Eif4a3l2	E9PV04;Q91VC3;A0A0N4SVP8	0.00690499	MI_IZ_vs_MI_remote
-1.02224	9.88526	-3.87278	0.00689696	0.0350514	-2.03628	Chrm2	Q9ERZ4	0.00689696	MI_IZ_vs_MI_remote
0.745659	13.7121	3.27527	0.00693878	0.0351714	-2.65083	Stom	P54116	0.00693878	MI_IZ_vs_MI_remote
1.15337	12.191	3.66521	0.00698231	0.0353403	-2.28294	Napsa	O09043	0.00698231	MI_IZ_vs_MI_remote
0.948835	11.6552	3.85835	0.0070213	0.0353653	-2.06577	Hck	P08103	0.0070213	MI_IZ_vs_MI_remote
-0.377618	14.0193	-3.26647	0.00705098	0.0353653	-2.66662	Ctnna1	P26231	0.00705098	MI_IZ_vs_MI_remote
-0.636558	18.356	-3.26631	0.00705301	0.0353653	-2.66691	Pdha1	P35486	0.00705301	MI_IZ_vs_MI_remote
0.855167	12.7054	3.26399	0.00708283	0.0353653	-2.67106	Snrpg	P62309	0.00708283	MI_IZ_vs_MI_remote
0.705776	13.821	3.2666	0.00704924	0.0353653	-2.66638	Ece1	Q4PZA2	0.00704924	MI_IZ_vs_MI_remote
0.56335	11.1994	3.26841	0.00702614	0.0353653	-2.66315	Tpd52	Q62393	0.00702614	MI_IZ_vs_MI_remote
0.802998	12.8688	3.26649	0.00705071	0.0353653	-2.66658	Ptbp3	Q8BHD7	0.00705071	MI_IZ_vs_MI_remote
-0.607006	15.1112	-3.26349	0.0070894	0.0353653	-2.67197	Cisd1	Q91WS0	0.0070894	MI_IZ_vs_MI_remote
0.610675	12.2651	3.41035	0.00707997	0.0353653	-2.4692	Cpn2	Q9DBB9	0.00707997	MI_IZ_vs_MI_remote
0.692751	11.5617	3.26353	0.00708881	0.0353653	-2.67189	Ybx3	Q9JKB3	0.00708881	MI_IZ_vs_MI_remote
0.540881	15.5667	3.26051	0.00712798	0.0353895	-2.67731	Calm1;Calm2;Calm3;Calml3	P0DP26;P0DP28;Q9D6P8;P0DP27	0.00712798	MI_IZ_vs_MI_remote
0.583493	14.8468	3.25996	0.00713514	0.0353895	-2.6783	Ppia	P17742	0.00713514	MI_IZ_vs_MI_remote
-0.731118	17.9102	-3.26039	0.00712955	0.0353895	-2.67753	Atp5me	Q06185	0.00712955	MI_IZ_vs_MI_remote
-0.561219	13.1631	-3.26101	0.00712151	0.0353895	-2.67642	Slc25a42	Q8R0Y8	0.00712151	MI_IZ_vs_MI_remote
0.585468	15.7107	3.2526	0.00723137	0.0354735	-2.69148	Lmnb1	P14733	0.00723137	MI_IZ_vs_MI_remote
0.384928	14.4074	3.25733	0.00716935	0.0354735	-2.68301	Rps11	P62281	0.00716935	MI_IZ_vs_MI_remote
-0.634217	12.4283	-3.25531	0.00719577	0.0354735	-2.68663	Nfia;Nfib;Nfic;Nfix	P70257;P70255;Q02780;P97863	0.00719577	MI_IZ_vs_MI_remote
-0.333542	13.3186	-3.25415	0.00721108	0.0354735	-2.68872	Camk2d	Q6PHZ2	0.00721108	MI_IZ_vs_MI_remote
-0.720869	14.9101	-3.25692	0.00717474	0.0354735	-2.68375	Adprhl1	Q8BGK2	0.00717474	MI_IZ_vs_MI_remote
0.379858	14.5033	3.25361	0.00721815	0.0354735	-2.68968	Rps19	Q9CZX8	0.00721815	MI_IZ_vs_MI_remote
-0.466436	12.7751	-3.2524	0.00723405	0.0354735	-2.69185	Agpat3	Q9D517	0.00723405	MI_IZ_vs_MI_remote
-0.501418	13.1401	-3.2554	0.00719469	0.0354735	-2.68648	Ndufaf3	Q9JKL4	0.00719469	MI_IZ_vs_MI_remote
-0.350393	12.5875	-3.24992	0.00726679	0.0355836	-2.69629	Pmpcb	Q9CXT8	0.00726679	MI_IZ_vs_MI_remote
-0.713383	15.9039	-3.24901	0.00727889	0.0355925	-2.69793	Ndufa2	Q9CQ75	0.00727889	MI_IZ_vs_MI_remote
0.36312	13.4179	3.24735	0.0073009	0.0356498	-2.7009	Eif2s1	Q6ZWX6	0.0073009	MI_IZ_vs_MI_remote
0.994298	11.3152	3.49204	0.00733452	0.0357635	-2.40429	Cd5l	Q9QWK4	0.00733452	MI_IZ_vs_MI_remote
-0.853678	15.7151	-3.24229	0.00736863	0.0358793	-2.70998	Atp5mk	Q78IK2	0.00736863	MI_IZ_vs_MI_remote
0.489266	12.8415	3.24019	0.00739691	0.0359664	-2.71375	Lta4h	P24527	0.00739691	MI_IZ_vs_MI_remote
-0.361473	13.3195	-3.2373	0.00743587	0.0360546	-2.71891	Ociad1	Q9CRD0	0.00743587	MI_IZ_vs_MI_remote
0.488806	13.2081	3.2374	0.00743462	0.0360546	-2.71875	Mvp	Q9EQK5	0.00743462	MI_IZ_vs_MI_remote
-0.532147	16.0692	-3.23448	0.00747424	0.0361899	-2.72398	Samm50	Q8BGH2	0.00747424	MI_IZ_vs_MI_remote
0.375576	14.4367	3.23281	0.00749703	0.0362205	-2.72697	Rpl7a	P12970	0.00749703	MI_IZ_vs_MI_remote
-0.668402	16.1853	-3.23249	0.00750147	0.0362205	-2.72755	Uqcrq	Q9CQ69	0.00750147	MI_IZ_vs_MI_remote
0.427199	11.4353	3.22858	0.00755509	0.0364286	-2.73456	Hnrnpul1	Q8VDM6	0.00755509	MI_IZ_vs_MI_remote
-0.637609	18.6853	-3.22547	0.00759807	0.0365849	-2.74013	Myh13;Myh4;Myh6;Myh7	Q91Z83;B1AR69;Q02566;Q5SX39	0.00759807	MI_IZ_vs_MI_remote
0.366046	14.2387	3.22015	0.00767208	0.0366861	-2.74966	Tcp1	P11983	0.00767208	MI_IZ_vs_MI_remote
-0.573024	16.6027	-3.22256	0.00763853	0.0366861	-2.74535	Prdx3	P20108	0.00763853	MI_IZ_vs_MI_remote
0.616109	12.4977	3.22085	0.00766232	0.0366861	-2.74841	Eif5a	P63242	0.00766232	MI_IZ_vs_MI_remote
0.362967	14.1163	3.22035	0.00766931	0.0366861	-2.74931	Cct6a	P80317	0.00766931	MI_IZ_vs_MI_remote
0.439412	12.6869	3.22205	0.00764554	0.0366861	-2.74626	Eif2s3x	Q9Z0N1	0.00764554	MI_IZ_vs_MI_remote
-0.584892	16.662	-3.21749	0.00770945	0.036814	-2.75444	Ech1	O35459	0.00770945	MI_IZ_vs_MI_remote
-0.606713	15.1193	-3.21426	0.00775495	0.0369293	-2.76022	Dcn	P28654	0.00775495	MI_IZ_vs_MI_remote
0.655871	12.0651	3.21498	0.00774488	0.0369293	-2.75894	Supt16h	Q920B9	0.00774488	MI_IZ_vs_MI_remote
0.621283	11.5947	3.27197	0.00781896	0.0371351	-2.72762	Pcyox1l	Q8C7K6	0.00781896	MI_IZ_vs_MI_remote
-0.481335	13.8064	-3.20896	0.00783034	0.0371351	-2.76973	Cbr4	Q91VT4	0.00783034	MI_IZ_vs_MI_remote
-0.6678	14.9035	-3.20946	0.0078232	0.0371351	-2.76883	Pcdhga2;Pcdhga3	Q91XY5;Q91XY6	0.0078232	MI_IZ_vs_MI_remote
0.472578	11.4682	3.20517	0.0078846	0.0373413	-2.77651	Pef1	Q8BFY6	0.0078846	MI_IZ_vs_MI_remote
-0.822091	18.0829	-3.20286	0.00791802	0.0373463	-2.78067	Tnnc1	P19123	0.00791802	MI_IZ_vs_MI_remote
0.476343	14.3436	3.20383	0.0079039	0.0373463	-2.77892	Actn1;Actn4	P57780;Q7TPR4	0.0079039	MI_IZ_vs_MI_remote
0.461794	12.6358	3.20338	0.00791042	0.0373463	-2.77973	Spcs3	Q6ZWQ7	0.00791042	MI_IZ_vs_MI_remote
0.360388	14.9552	3.20028	0.00795525	0.0374709	-2.78528	Psma4	Q9R1P0	0.00795525	MI_IZ_vs_MI_remote
0.898425	11.1785	3.56885	0.00799112	0.0375887	-2.41899	Ccdc86	Q9JJ89	0.00799112	MI_IZ_vs_MI_remote
0.334705	16.0116	3.1956	0.00802358	0.0376565	-2.79368	Rack1	P68040	0.00802358	MI_IZ_vs_MI_remote
0.839412	10.8073	3.56564	0.00802728	0.0376565	-2.46398	Mrto4	Q9D0I8	0.00802728	MI_IZ_vs_MI_remote
-0.520443	17.5226	-3.19317	0.00805923	0.0377552	-2.79803	Col6a3	E9PWQ3	0.00805923	MI_IZ_vs_MI_remote
0.734558	13.2222	3.19023	0.0081025	0.0378979	-2.80329	Esyt1	Q3U7R1	0.0081025	MI_IZ_vs_MI_remote
-0.709471	13.7493	-3.18962	0.00811159	0.0378979	-2.80439	Micos13	Q8R404	0.00811159	MI_IZ_vs_MI_remote
-0.735794	13.8354	-3.18637	0.00815978	0.0380697	-2.81021	Hrc	G5E8J6	0.00815978	MI_IZ_vs_MI_remote
-0.55756	12.1958	-3.2458	0.00818368	0.0380697	-2.71117	Sbk2	P0C5K1	0.00818368	MI_IZ_vs_MI_remote
0.339446	13.93	3.18425	0.0081915	0.0380697	-2.81402	Cct6a;Cct6b	P80317;Q61390	0.0081915	MI_IZ_vs_MI_remote
-0.506291	13.4917	-3.18419	0.00819236	0.0380697	-2.81412	Hk1;Hk2;Hk3	Q3TRM8;P17710;O08528	0.00819236	MI_IZ_vs_MI_remote
-0.50119	14.1892	-3.17988	0.00825697	0.0381755	-2.82183	Ryr2	E9Q401	0.00825697	MI_IZ_vs_MI_remote
0.363361	15.2477	3.18092	0.00824137	0.0381755	-2.81998	Rps15a	P62245	0.00824137	MI_IZ_vs_MI_remote
-0.40165	12.4968	-3.17974	0.00825922	0.0381755	-2.8221	Cyb5r1	Q9DB73	0.00825922	MI_IZ_vs_MI_remote
-0.389824	13.7145	-3.18122	0.00823685	0.0381755	-2.81944	Nfs1	Q9Z1J3	0.00823685	MI_IZ_vs_MI_remote
0.338109	13.733	3.17616	0.00831332	0.0383743	-2.82851	Rpl5	P47962	0.00831332	MI_IZ_vs_MI_remote
0.441493	14.0356	3.17351	0.00835367	0.0385092	-2.83326	Srsf7	Q8BL97	0.00835367	MI_IZ_vs_MI_remote
-0.541548	14.5875	-3.17188	0.00837857	0.0385726	-2.83619	Lum	P51885	0.00837857	MI_IZ_vs_MI_remote
1.36121	9.97508	3.2284	0.00843571	0.0387841	-2.74106	Pnp	P23492	0.00843571	MI_IZ_vs_MI_remote
-0.680662	19.3884	-3.1634	0.00850918	0.03907	-2.85137	Cox4i1	P19783	0.00850918	MI_IZ_vs_MI_remote
-0.593081	17.0675	-3.16068	0.00855155	0.0392125	-2.85624	Nnt	Q61941	0.00855155	MI_IZ_vs_MI_remote
0.496776	13.1902	3.15973	0.00856643	0.0392288	-2.85794	Srsf1	Q6PDM2	0.00856643	MI_IZ_vs_MI_remote
-0.512351	13.5007	-3.15539	0.00863461	0.0393322	-2.86572	Hk1;Hkdc1	P17710;Q91W97	0.00863461	MI_IZ_vs_MI_remote
-0.633585	17.1481	-3.15468	0.00864581	0.0393322	-2.86699	Ogdh	Q60597	0.00864581	MI_IZ_vs_MI_remote
-0.519229	13.6156	-3.15493	0.00864189	0.0393322	-2.86655	Ptgr3	Q8BGC4	0.00864189	MI_IZ_vs_MI_remote
-0.774116	18.373	-3.15535	0.00863528	0.0393322	-2.8658	Idh3a	Q9D6R2	0.00863528	MI_IZ_vs_MI_remote
-0.772193	15.4268	-3.15643	0.00861821	0.0393322	-2.86386	Atp1a1;Atp1a2;Atp1a4	Q9WV27;Q8VDN2;Q6PIE5	0.00861821	MI_IZ_vs_MI_remote
0.426205	13.9965	3.14974	0.00872421	0.0395254	-2.87585	Rpl3	P27659	0.00872421	MI_IZ_vs_MI_remote
-0.613394	13.342	-3.14864	0.00874175	0.0395254	-2.87782	Slc27a1	Q60714	0.00874175	MI_IZ_vs_MI_remote
1.77992	11.7559	3.28301	0.00873058	0.0395254	-2.63355	Ifi204;Ifi205a;Mnda	Q8CGE8;P0DOV1;P0DOV2	0.00873058	MI_IZ_vs_MI_remote
0.48681	13.8366	3.1503	0.00871526	0.0395254	-2.87484	Sfpq	Q8VIJ6	0.00871526	MI_IZ_vs_MI_remote
-0.512303	14.7252	-3.14841	0.00874537	0.0395254	-2.87822	Pccb	Q99MN9	0.00874537	MI_IZ_vs_MI_remote
0.959466	12.3105	3.14646	0.00877661	0.0396149	-2.88172	Itgb5	O70309	0.00877661	MI_IZ_vs_MI_remote
-0.556532	20.4132	-3.14242	0.00884155	0.039655	-2.88895	Myl3	P09542	0.00884155	MI_IZ_vs_MI_remote
0.530797	14.1039	3.13951	0.00888859	0.039655	-2.89415	Mug1	P28665	0.00888859	MI_IZ_vs_MI_remote
0.431679	11.2663	3.14008	0.00887939	0.039655	-2.89314	Rangap1	P46061	0.00887939	MI_IZ_vs_MI_remote
-0.67952	15.5009	-3.1448	0.00880321	0.039655	-2.88469	Ndufs6	P52503	0.00880321	MI_IZ_vs_MI_remote
-0.37245	11.9366	-3.19935	0.00887429	0.039655	-2.79098	Pdp1	Q3UV70	0.00887429	MI_IZ_vs_MI_remote
0.430251	11.7405	3.14136	0.00885875	0.039655	-2.89085	Ddx46	Q569Z5	0.00885875	MI_IZ_vs_MI_remote
0.487679	13.0165	3.14335	0.00882648	0.039655	-2.88728	Rpl10	Q6ZWV3	0.00882648	MI_IZ_vs_MI_remote
-0.728436	11.8314	-3.14099	0.00886465	0.039655	-2.89151	Mapk10;Mapk11;Mapk12;Mapk13;Mapk14;Mapk8;Mapk9	Q91Y86;Q61831;Q9WUI1;P47811;O08911;Q9WTU6;Q9Z1B7	0.00886465	MI_IZ_vs_MI_remote
-0.670553	13.4631	-3.14226	0.00884419	0.039655	-2.88924	Ndufs5	Q99LY9	0.00884419	MI_IZ_vs_MI_remote
-0.694856	12.0605	-3.13859	0.00890367	0.0396712	-2.89581	Mrpl46	Q9EQI8	0.00890367	MI_IZ_vs_MI_remote
-0.385988	16.9653	-3.13611	0.00894404	0.0397998	-2.90025	Trap1	Q9CQN1	0.00894404	MI_IZ_vs_MI_remote
-0.776968	15.1349	-3.12343	0.00915356	0.0405238	-2.92294	Mtco1	P00397	0.00915356	MI_IZ_vs_MI_remote
0.458306	12.3498	3.12396	0.00914483	0.0405238	-2.92201	Sf3a1	Q8K4Z5	0.00914483	MI_IZ_vs_MI_remote
0.494803	13.7901	3.12496	0.009128	0.0405238	-2.9202	Gm6133;Rpl17	Q9CPR4;B2RY53	0.009128	MI_IZ_vs_MI_remote
0.80707	9.9409	3.34859	0.00914554	0.0405238	-2.58747	Pin4	Q9CWW6	0.00914554	MI_IZ_vs_MI_remote
-1.09638	17.3456	-3.12181	0.00918079	0.0405407	-2.92585	Idh1;Idh2	O88844;P54071	0.00918079	MI_IZ_vs_MI_remote
0.48689	13.739	3.12203	0.00917705	0.0405407	-2.92546	Hnrnpd	Q60668	0.00917705	MI_IZ_vs_MI_remote
-0.520324	13.7889	-3.11521	0.00929221	0.0408394	-2.93767	Mtx2	O88441	0.00929221	MI_IZ_vs_MI_remote
0.308598	14.3543	3.11494	0.0092968	0.0408394	-2.93816	Cct8	P42932	0.0092968	MI_IZ_vs_MI_remote
-0.833321	12.0288	-3.17207	0.00930742	0.0408394	-2.83787	Fdx1	P46656	0.00930742	MI_IZ_vs_MI_remote
-0.526872	13.2562	-3.11661	0.00926838	0.0408394	-2.93516	Tmem11	Q8BK08	0.00926838	MI_IZ_vs_MI_remote
-0.613813	16.5912	-3.11615	0.00927615	0.0408394	-2.93598	Ndufv1	Q91YT0	0.00927615	MI_IZ_vs_MI_remote
-0.471953	13.7515	-3.11314	0.00932728	0.0408748	-2.94136	Map7d1	A2AJI0	0.00932728	MI_IZ_vs_MI_remote
0.325111	13.6849	3.10846	0.00940752	0.0411743	-2.94975	Elavl1	P70372	0.00940752	MI_IZ_vs_MI_remote
0.451792	14.5745	3.10673	0.00943731	0.0412525	-2.95285	Rps27;Rps27l	Q6ZWY3;Q6ZWU9	0.00943731	MI_IZ_vs_MI_remote
-0.410316	14.021	-3.1056	0.00945671	0.0412852	-2.95486	Fkbp3	Q62446	0.00945671	MI_IZ_vs_MI_remote
0.703439	11.7405	3.1572	0.00955231	0.0416379	-2.86341	Nolc1	E9Q5C9	0.00955231	MI_IZ_vs_MI_remote
-0.559576	18.0784	-3.09957	0.00956157	0.0416379	-2.96566	Pmpcb;Uqcrc1	Q9CZ13;Q9CXT8	0.00956157	MI_IZ_vs_MI_remote
0.756138	12.3037	3.09824	0.00958481	0.0416867	-2.96804	Cav2	Q9WVC3	0.00958481	MI_IZ_vs_MI_remote
0.771555	11.5898	3.2258	0.00959724	0.0416884	-2.72663	Iglv1	P01727;P01728;P01723;P01726;A0A075B663;P01729	0.00959724	MI_IZ_vs_MI_remote
-0.7526	15.5107	-3.09434	0.00965344	0.0418392	-2.97502	Actn1;Actn2;Actn3	Q7TPR4;O88990;Q9JI91	0.00965344	MI_IZ_vs_MI_remote
-0.452987	12.9281	-3.09418	0.00965613	0.0418392	-2.97529	Btf3l4	Q9CQH7	0.00965613	MI_IZ_vs_MI_remote
-0.405654	14.3767	-3.09312	0.00967495	0.0418684	-2.9772	Opa1	P58281	0.00967495	MI_IZ_vs_MI_remote
0.413113	15.3933	3.09195	0.00969563	0.0419054	-2.97929	Rps25	P62852	0.00969563	MI_IZ_vs_MI_remote
0.628753	9.80552	3.21707	0.00973713	0.0420323	-2.78466	Fbl;Fbll1	Q80WS3;P35550	0.00973713	MI_IZ_vs_MI_remote
0.483079	12.2421	3.08671	0.0097889	0.0421999	-2.98866	Nos3	P70313	0.0097889	MI_IZ_vs_MI_remote
0.98315	12.4062	3.08607	0.00980032	0.0421999	-2.9898	Rhog	P84096	0.00980032	MI_IZ_vs_MI_remote
0.390196	12.1159	3.08335	0.00984927	0.0423054	-2.99468	Rpl36a;Rpl36a-ps1	P83882;A0A2I3BPG9	0.00984927	MI_IZ_vs_MI_remote
1.17374	10.9999	3.42155	0.00984666	0.0423054	-2.67104	Mprip	P97434	0.00984666	MI_IZ_vs_MI_remote
1.14694	10.4277	3.29962	0.00986639	0.0423264	-2.79308	Uck1;Uck2	P52623;Q99PM9	0.00986639	MI_IZ_vs_MI_remote
0.647772	9.75973	3.13727	0.00989111	0.0423276	-2.89766	Vamp2;Vamp3	P63044;P63024	0.00989111	MI_IZ_vs_MI_remote
-0.446278	12.2749	-3.08152	0.00988226	0.0423276	-2.99795	Dnajc11	Q5U458	0.00988226	MI_IZ_vs_MI_remote
-0.669234	17.7136	-3.07933	0.00992185	0.0424067	-3.00186	Acadvl	P50544	0.00992185	MI_IZ_vs_MI_remote
-0.47686	12.0142	-3.13241	0.00997551	0.0425737	-2.90601	Rcn2	Q8BP92	0.00997551	MI_IZ_vs_MI_remote
-0.43422	13.0819	-3.07464	0.0100073	0.0425737	-3.01025	Mrpl9	Q99N94	0.0100073	MI_IZ_vs_MI_remote
-0.458626	12.7263	-3.07449	0.0100101	0.0425737	-3.01053	Adck1	Q9D0L4	0.0100101	MI_IZ_vs_MI_remote
-0.391502	13.3622	-3.07453	0.0100093	0.0425737	-3.01044	Tmem126a	Q9D8Y1	0.0100093	MI_IZ_vs_MI_remote
-0.602544	19.0253	-3.07272	0.0100424	0.0426586	-3.01368	Uqcrc1	Q9CZ13	0.0100424	MI_IZ_vs_MI_remote
-0.353012	11.8747	-3.07199	0.010056	0.0426639	-3.015	Clpx	Q9JHS4	0.010056	MI_IZ_vs_MI_remote
-0.437923	17.1878	-3.06862	0.010118	0.0428746	-3.02101	Slc25a11	Q9CR62	0.010118	MI_IZ_vs_MI_remote
-0.605942	16.8246	-3.06659	0.0101556	0.0429814	-3.02464	Uqcrc2	Q9DB77	0.0101556	MI_IZ_vs_MI_remote
1.37554	11.5009	3.18988	0.0101863	0.0430585	-2.82919	Faf1	P54731	0.0101863	MI_IZ_vs_MI_remote
0.389285	12.0352	3.06052	0.0102691	0.0433027	-3.03551	Rpl32	P62911	0.0102691	MI_IZ_vs_MI_remote
-1.10267	17.6297	-3.06057	0.0102681	0.0433027	-3.03542	Myh3;Myh6	Q02566;P13541	0.0102681	MI_IZ_vs_MI_remote
0.587233	11.2288	3.0597	0.0102844	0.0433144	-3.03696	Sec24d	Q6NXL1	0.0102844	MI_IZ_vs_MI_remote
-0.486211	13.6723	-3.05774	0.0103213	0.043417	-3.04046	Ctsd	P18242	0.0103213	MI_IZ_vs_MI_remote
0.301776	13.5726	3.05672	0.0103405	0.0434396	-3.04229	Kpnb1	P70168	0.0103405	MI_IZ_vs_MI_remote
-0.46268	12.5935	-3.11126	0.0103517	0.0434396	-2.94237	Myzap	Q3UIJ9	0.0103517	MI_IZ_vs_MI_remote
-0.626502	19.222	-3.0545	0.0103826	0.0434638	-3.04626	Atp2a2	O55143	0.0103826	MI_IZ_vs_MI_remote
0.443093	12.2268	3.05496	0.0103738	0.0434638	-3.04543	Plod3	Q9R0E1	0.0103738	MI_IZ_vs_MI_remote
1.26979	11.466	3.54742	0.0103974	0.0434731	-2.44974	F5	O88783	0.0103974	MI_IZ_vs_MI_remote
0.412023	11.9159	3.05086	0.010452	0.043605	-3.05277	Uggt1	Q6P5E4	0.010452	MI_IZ_vs_MI_remote
-0.558808	18.534	-3.05075	0.0104541	0.043605	-3.05297	Atp5f1c	Q91VR2	0.0104541	MI_IZ_vs_MI_remote
0.640906	12.0487	3.10296	0.0105033	0.0437572	-3.01946	Lima1;Limd2	Q8BGB5;Q9ERG0	0.0105033	MI_IZ_vs_MI_remote
0.555987	14.1641	3.04405	0.010583	0.0440363	-3.06494	Hnrnpa1;Hnrnpa3	Q8BG05;P49312	0.010583	MI_IZ_vs_MI_remote
0.358689	14.3266	3.04136	0.0106352	0.0442005	-3.06975	Rps13	P62301	0.0106352	MI_IZ_vs_MI_remote
-0.51775	18.0946	-3.04022	0.0106572	0.0442312	-3.07177	Hadh	Q61425	0.0106572	MI_IZ_vs_MI_remote
-0.545389	17.2229	-3.03966	0.0106681	0.0442312	-3.07277	Sdhb	Q9CQA3	0.0106681	MI_IZ_vs_MI_remote
-0.58072	12.1221	-3.09097	0.0107261	0.0443651	-2.97723	Acad11	Q80XL6	0.0107261	MI_IZ_vs_MI_remote
-1.09602	11.4721	-3.15941	0.010715	0.0443651	-2.83483	Myh13;Myh7	Q91Z83;B1AR69	0.010715	MI_IZ_vs_MI_remote
0.623006	11.5113	3.03603	0.0107392	0.0443665	-3.07926	Tbc1d15	Q9CXF4	0.0107392	MI_IZ_vs_MI_remote
-0.873863	11.9147	-3.1539	0.0108137	0.0446208	-2.84383	Ptgfrn	Q9WV91	0.0108137	MI_IZ_vs_MI_remote
1.77174	11.7315	3.23751	0.0108673	0.0446904	-2.79529	Aldh3b1	Q80VQ0	0.0108673	MI_IZ_vs_MI_remote
0.764715	9.31611	3.23739	0.0108692	0.0446904	-2.75804	Ddx19a;Ddx19b	Q8BZY3;Q61655	0.0108692	MI_IZ_vs_MI_remote
-0.495351	15.4371	-3.03013	0.0108557	0.0446904	-3.0898	Mpc2	Q9D023	0.0108557	MI_IZ_vs_MI_remote
-0.590349	16.8153	-3.02788	0.0109006	0.0447662	-3.09383	Srl	Q7TQ48	0.0109006	MI_IZ_vs_MI_remote
-0.454461	12.265	-3.02574	0.0109432	0.0448346	-3.09763	Pdlim4	P70271	0.0109432	MI_IZ_vs_MI_remote
-0.733489	10.4795	-3.1473	0.0109329	0.0448346	-2.95114	Palm2	Q8BR92	0.0109329	MI_IZ_vs_MI_remote
0.933303	12.8133	3.02393	0.0109796	0.0449308	-3.10088	Apoc1	P34928	0.0109796	MI_IZ_vs_MI_remote
1.01767	12.2486	3.02327	0.0109929	0.0449321	-3.10206	Tapbp	Q9R233	0.0109929	MI_IZ_vs_MI_remote
-0.501926	12.2807	-3.07416	0.0110466	0.045045	-3.00611	Cars2	Q8BYM8	0.0110466	MI_IZ_vs_MI_remote
-0.540667	15.0385	-3.02119	0.0110346	0.045045	-3.10576	Pcca	Q91ZA3	0.0110346	MI_IZ_vs_MI_remote
0.393977	13.3938	3.0136	0.011189	0.0455723	-3.11933	Grb2	Q60631	0.011189	MI_IZ_vs_MI_remote
-0.800729	10.1234	-3.06398	0.0112454	0.0457479	-3.0236	Ablim2	Q8BL65	0.0112454	MI_IZ_vs_MI_remote
0.500942	14.3928	3.00903	0.0112829	0.0458469	-3.12748	Lmnb1;Lmnb2	P21619;P14733	0.0112829	MI_IZ_vs_MI_remote
-0.323002	12.6558	-3.00643	0.0113366	0.0460108	-3.13211	Abcb10	Q9JI39	0.0113366	MI_IZ_vs_MI_remote
-0.68419	20.5057	-3.00375	0.0113923	0.0461289	-3.1369	Myh1;Myh3;Myh4;Myh6;Myh7	Q91Z83;Q02566;P13541;Q5SX39;Q5SX40	0.0113923	MI_IZ_vs_MI_remote
-0.469949	13.4215	-3.00377	0.011392	0.0461289	-3.13687	Fundc2	Q9D6K8	0.011392	MI_IZ_vs_MI_remote
0.436637	12.2865	3.00029	0.0114648	0.046368	-3.14308	Pdap1	Q3UHX2	0.0114648	MI_IZ_vs_MI_remote
-0.766393	14.2332	-2.99943	0.0114826	0.0463861	-3.1446	Cdh2	P15116	0.0114826	MI_IZ_vs_MI_remote
0.338427	14.6831	2.99822	0.0115082	0.0464352	-3.14677	Cct3	P80318	0.0115082	MI_IZ_vs_MI_remote
-1.18367	14.8125	-2.99635	0.0115476	0.0465397	-3.1501	Nppa	P05125	0.0115476	MI_IZ_vs_MI_remote
-0.473823	14.3138	-2.99408	0.0115957	0.0466402	-3.15416	Apool	Q78IK4	0.0115957	MI_IZ_vs_MI_remote
-0.671391	13.4086	-2.9934	0.0116101	0.0466402	-3.15537	Pdk1	Q8BFP9	0.0116101	MI_IZ_vs_MI_remote
-0.508613	11.9231	-2.99327	0.0116129	0.0466402	-3.1556	Dtna;Dtnb	Q9D2N4;O70585	0.0116129	MI_IZ_vs_MI_remote
-0.565668	17.6339	-2.99045	0.0116729	0.0468269	-3.16063	Col6a1	Q04857	0.0116729	MI_IZ_vs_MI_remote
0.527147	9.94982	3.0402	0.011724	0.0469233	-3.06445	Pcdh7	A0A0A6YY83	0.011724	MI_IZ_vs_MI_remote
-3.04588	12.5884	-3.30044	0.0117165	0.0469233	-2.62536	Myl4	P09541	0.0117165	MI_IZ_vs_MI_remote
1.21117	11.2372	3.18696	0.0117599	0.0470123	-2.96922	Gng2	P63213	0.0117599	MI_IZ_vs_MI_remote
0.353094	15.1308	2.98399	0.0118117	0.0471652	-3.17216	Hnrnpk	P61979	0.0118117	MI_IZ_vs_MI_remote
-0.536858	21.006	-2.9822	0.0118503	0.0472104	-3.17534	Atp5f1b	P56480	0.0118503	MI_IZ_vs_MI_remote
0.731275	12.8335	2.98241	0.0118459	0.0472104	-3.17498	Brk1	Q91VR8	0.0118459	MI_IZ_vs_MI_remote
-0.438702	12.4009	-3.09688	0.0118903	0.0473151	-2.98168	Slc25a46	Q9CQS4	0.0118903	MI_IZ_vs_MI_remote
0.458981	11.571	2.97863	0.0119281	0.047411	-3.18171	Znf207	Q9JMD0	0.0119281	MI_IZ_vs_MI_remote
0.440615	12.684	2.97787	0.0119447	0.0474225	-3.18307	Cers2	Q924Z4	0.0119447	MI_IZ_vs_MI_remote
1.05739	12.2319	3.28392	0.0119994	0.0475851	-2.79119	A1bg	Q19LI2	0.0119994	MI_IZ_vs_MI_remote
-0.351041	13.6455	-2.9693	0.0121332	0.0479052	-3.19834	Gpd1	P13707	0.0121332	MI_IZ_vs_MI_remote
0.976764	11.379	3.27574	0.0121422	0.0479052	-2.83997	Lyn	P25911	0.0121422	MI_IZ_vs_MI_remote
-0.689515	19.199	-2.96765	0.01217	0.0479052	-3.20129	Idh2	P54071	0.01217	MI_IZ_vs_MI_remote
-0.719046	16.7197	-2.96997	0.0121184	0.0479052	-3.19715	Cox6b1	P56391	0.0121184	MI_IZ_vs_MI_remote
-0.384055	15.2178	-2.96962	0.0121263	0.0479052	-3.19778	Trim72	Q1XH17	0.0121263	MI_IZ_vs_MI_remote
-0.536982	13.3697	-2.9677	0.0121688	0.0479052	-3.20119	Opa3	Q505D7	0.0121688	MI_IZ_vs_MI_remote
-0.386216	12.1158	-2.96696	0.0121854	0.0479052	-3.20252	Kank2	Q8BX02	0.0121854	MI_IZ_vs_MI_remote
0.706207	16.7569	2.96672	0.0121908	0.0479052	-3.20295	Flnc	Q8VHX6	0.0121908	MI_IZ_vs_MI_remote
-0.808037	13.3781	-2.96556	0.0122167	0.0479526	-3.20501	Suox	Q8R086	0.0122167	MI_IZ_vs_MI_remote
-0.4529	19.5395	-2.96033	0.0123341	0.0483587	-3.21433	Mtco2	P00405	0.0123341	MI_IZ_vs_MI_remote
0.309315	14.9902	2.95788	0.0123896	0.048498	-3.2187	Rpl31	P62900	0.0123896	MI_IZ_vs_MI_remote
1.14314	11.941	3.26015	0.0124194	0.048498	-2.90582	H6pd	Q8CFX1	0.0124194	MI_IZ_vs_MI_remote
-0.573327	19.3484	-2.95669	0.0124165	0.048498	-3.22082	Cs	Q9CZU6	0.0124165	MI_IZ_vs_MI_remote
-0.506933	13.854	-2.95628	0.0124257	0.048498	-3.22154	Jph2	Q9ET78	0.0124257	MI_IZ_vs_MI_remote
0.315111	13.5196	2.9533	0.0124937	0.0487084	-3.22685	Cct7	P80313	0.0124937	MI_IZ_vs_MI_remote
0.724927	11.4983	3.14742	0.012511	0.0487211	-2.89674	Celf1;Celf2	Q9Z0H4;P28659	0.012511	MI_IZ_vs_MI_remote
-0.405418	12.744	-2.95125	0.0125407	0.048782	-3.23051	Eci2	Q9WUR2	0.0125407	MI_IZ_vs_MI_remote
-0.317654	14.5502	-2.94739	0.0126296	0.0490725	-3.23739	Lamb1	P02469	0.0126296	MI_IZ_vs_MI_remote
0.399051	13.4181	2.94578	0.0126667	0.0491066	-3.24025	Rpl3;Rpl3l	P27659;E9PWZ3	0.0126667	MI_IZ_vs_MI_remote
-0.565788	13.6071	-2.94583	0.0126655	0.0491066	-3.24015	Hibadh	Q99L13	0.0126655	MI_IZ_vs_MI_remote
-0.496392	15.4659	-2.94219	0.0127502	0.0493678	-3.24664	Pfkl;Pfkm;Pfkp	P12382;P47857;Q9WUA3	0.0127502	MI_IZ_vs_MI_remote
-0.78904	15.0372	-2.94166	0.0127626	0.0493678	-3.24759	Atp5mg	Q9CPQ8	0.0127626	MI_IZ_vs_MI_remote
-0.615053	14.4153	-2.9364	0.0128861	0.0497898	-3.25696	Pkp2	Q9CQ73	0.0128861	MI_IZ_vs_MI_remote
-0.416432	12.7932	-2.93561	0.0129047	0.049806	-3.25836	Tmem65	Q4VAE3	0.0129047	MI_IZ_vs_MI_remote
-0.449217	13.4659	-2.93242	0.0129801	0.0500332	-3.26403	Gls	D3Z7P3	0.0129801	MI_IZ_vs_MI_remote
0.803512	12.5818	2.9319	0.0129925	0.0500332	-3.26496	Hmgb1;Hmgb2	P63158;P30681	0.0129925	MI_IZ_vs_MI_remote
-0.480488	12.943	-2.93002	0.0130374	0.0501504	-3.26831	Ndufaf2	Q59J78	0.0130374	MI_IZ_vs_MI_remote
-0.558948	15.2885	-2.92869	0.0130689	0.0501931	-3.27066	Oat	P29758	0.0130689	MI_IZ_vs_MI_remote
-0.395151	12.3716	-2.92834	0.0130775	0.0501931	-3.2713	Mecp2	Q9Z2D6	0.0130775	MI_IZ_vs_MI_remote
0.330356	13.1893	2.92586	0.0131368	0.0503649	-3.2757	Nudc	O35685	0.0131368	MI_IZ_vs_MI_remote
0.463858	12.2547	2.92453	0.0131689	0.0504321	-3.27808	Gnb2;Gnb4	P29387;P62880	0.0131689	MI_IZ_vs_MI_remote
0.377958	14.9642	2.92206	0.0132285	0.050498	-3.28247	Rpl27	P61358	0.0132285	MI_IZ_vs_MI_remote
-0.718948	11.7296	-3.03391	0.0132076	0.050498	-3.03973	Nfib	P97863	0.0132076	MI_IZ_vs_MI_remote
-0.563435	15.1142	-2.922	0.0132298	0.050498	-3.28257	Ndufs8	Q8K3J1	0.0132298	MI_IZ_vs_MI_remote
-0.483953	11.4241	-2.96941	0.0132747	0.0506136	-3.18597	Slco3a1	Q8R3L5	0.0132747	MI_IZ_vs_MI_remote
0.415496	12.6089	2.91932	0.013295	0.0506351	-3.28735	Fasn	P19096	0.013295	MI_IZ_vs_MI_remote
0.597694	11.8747	2.91587	0.0133791	0.0508994	-3.29348	Rac1;Rac2	P63001;Q05144	0.0133791	MI_IZ_vs_MI_remote
-0.485235	15.9199	-2.91479	0.0134055	0.0509024	-3.29539	Pfkm	P47857	0.0134055	MI_IZ_vs_MI_remote
-0.423471	13.0682	-2.91464	0.0134093	0.0509024	-3.29567	Suclg2	Q9Z2I8	0.0134093	MI_IZ_vs_MI_remote
-0.6054	16.6795	-2.91255	0.0134606	0.051041	-3.29938	Ndufa10	Q99LC3	0.0134606	MI_IZ_vs_MI_remote
-0.55819	13.5556	-2.90839	0.0135635	0.0513751	-3.30678	Calu	O35887	0.0135635	MI_IZ_vs_MI_remote
0.457061	12.6814	2.90621	0.0136176	0.0514161	-3.31065	Ddx23	D3Z0M9	0.0136176	MI_IZ_vs_MI_remote
1.49029	13.7241	2.90638	0.0136134	0.0514161	-3.31035	Dsg1a;Dsg1b;Dsg1c	Q61495;Q7TSF0;Q7TSF1	0.0136134	MI_IZ_vs_MI_remote
-0.497238	12.6415	-2.90616	0.0136189	0.0514161	-3.31074	Mrpl50	Q8VDT9	0.0136189	MI_IZ_vs_MI_remote
-0.486017	13.4374	-2.90389	0.0136754	0.051566	-3.31477	Lmod2	Q3UHZ5	0.0136754	MI_IZ_vs_MI_remote
0.429666	12.1705	2.90338	0.0136884	0.051566	-3.31569	Sf3b3	Q921M3	0.0136884	MI_IZ_vs_MI_remote
-0.789699	14.4254	-2.9027	0.0137054	0.0515739	-3.3169	Cox7b	P56393	0.0137054	MI_IZ_vs_MI_remote
1.16673	17.277	2.90147	0.0137361	0.0515848	-3.31907	Hba;Hbz	P01942;P06467	0.0137361	MI_IZ_vs_MI_remote
0.354685	13.5456	2.9014	0.0137381	0.0515848	-3.31921	Hnrnpc	Q9Z204	0.0137381	MI_IZ_vs_MI_remote
0.349843	11.9328	2.89732	0.0138408	0.0519144	-3.32645	Etf1	Q8BWY3	0.0138408	MI_IZ_vs_MI_remote
-0.424785	14.169	-2.89353	0.0139371	0.0520715	-3.33319	Hsd17b8	P50171	0.0139371	MI_IZ_vs_MI_remote
-0.501522	15.4389	-2.8933	0.0139429	0.0520715	-3.33359	Actn1;Actn2;Actn3;Actn4	P57780;Q7TPR4;O88990;Q9JI91	0.0139429	MI_IZ_vs_MI_remote
0.32352	15.5973	2.8938	0.0139303	0.0520715	-3.33271	Rps9	Q6ZWN5	0.0139303	MI_IZ_vs_MI_remote
0.307003	14.6339	2.89375	0.0139316	0.0520715	-3.3328	Rps21	Q9CQR2	0.0139316	MI_IZ_vs_MI_remote
-0.385803	13.4155	-2.89268	0.0139588	0.0520748	-3.3347	Mtch1	Q791T5	0.0139588	MI_IZ_vs_MI_remote
-0.540442	11.1952	-2.89044	0.0140161	0.0520911	-3.33868	Rabgap1l	A6H6A9	0.0140161	MI_IZ_vs_MI_remote
-0.880243	11.3986	-2.93818	0.0140234	0.0520911	-3.23954	Serpina1a;Serpina1c;Serpina1d	P07758;Q00897;Q00896	0.0140234	MI_IZ_vs_MI_remote
0.70387	11.8138	2.89063	0.0140113	0.0520911	-3.33834	Cpne2;Cpne3;Cpne4;Cpne5;Cpne6;Cpne7;Cpne8;Cpne9	Q0VE82;P59108;Q9Z140;Q8JZW4;Q1RLL3;Q8BT60;Q9DC53;Q8BLR2	0.0140113	MI_IZ_vs_MI_remote
-0.509503	20.7066	-2.89141	0.0139912	0.0520911	-3.33695	Acta1;Acta2;Actb;Actbl2;Actc1;Actg1;Actg2	Q8BFZ3;P63268;P62737;P60710;P68134;P68033;P63260	0.0139912	MI_IZ_vs_MI_remote
0.738847	11.3398	2.88798	0.0140793	0.0522428	-3.34305	Eif1a;Eif1ad10;Eif1ad11;Eif1ad12;Eif1ad13;Eif1ad14;Eif1ad15;Eif1ad16;Eif1ad17;Eif1ad18;Eif1ad2;Eif1ad3;Eif1ad4;Eif1ad7;Eif1ax	A0A1Y7VLT7;Q3UTA4;J3QPI8;Q60872;J3QQ02;A0A1Y7VJE9;A0A1Y7VNG9;Q3TQZ4;A0A1Y7VK80;Q8BMJ3;J3QMW5;J3QP87;J3QNT6;Q3UT53;Q8BX20	0.0140793	MI_IZ_vs_MI_remote
0.363144	13.3065	2.88658	0.0141155	0.0523177	-3.34554	Sarnp	Q9D1J3	0.0141155	MI_IZ_vs_MI_remote
-0.361355	14.1107	-2.88603	0.0141297	0.0523177	-3.34652	Acadsb	Q9DBL1	0.0141297	MI_IZ_vs_MI_remote
-0.709933	14.801	-2.88462	0.0141662	0.0523969	-3.34902	Acad10;Acad12	Q8K370;D3Z7X0	0.0141662	MI_IZ_vs_MI_remote
0.624229	12.3122	2.884	0.0141821	0.0523996	-3.35011	Ptbp1	P17225	0.0141821	MI_IZ_vs_MI_remote
0.571973	12.5212	2.88229	0.0142267	0.0524751	-3.35316	Dbnl	Q62418	0.0142267	MI_IZ_vs_MI_remote
0.632693	11.6374	2.92974	0.0142328	0.0524751	-3.254	Hm13	Q9D8V0	0.0142328	MI_IZ_vs_MI_remote
-0.40102	12.4019	-2.88011	0.0142834	0.0526056	-3.35702	Camk2a;Camk2b;Camk2d	P11798;Q6PHZ2;P28652	0.0142834	MI_IZ_vs_MI_remote
-0.893652	12.9037	-2.92604	0.0143256	0.0527049	-3.26034	Amer2	Q8CCJ4	0.0143256	MI_IZ_vs_MI_remote
-0.488953	12.4506	-2.87757	0.01435	0.0527386	-3.36154	Atpaf1	Q811I0	0.01435	MI_IZ_vs_MI_remote
-0.742212	18.2587	-2.87616	0.0143869	0.0527623	-3.36403	Atp2a1;Atp2a2;Atp2a3	Q8R429;Q64518;O55143	0.0143869	MI_IZ_vs_MI_remote
-0.482362	13.3057	-2.87664	0.0143743	0.0527623	-3.36318	Mrpl12	Q9DB15	0.0143743	MI_IZ_vs_MI_remote
-0.445205	12.561	-2.92192	0.0144297	0.0528438	-3.2674	Lyrm4	Q8K215	0.0144297	MI_IZ_vs_MI_remote
0.294021	16.1621	2.87416	0.0144397	0.0528438	-3.36758	Rpl15	Q9CZM2	0.0144397	MI_IZ_vs_MI_remote
-0.436159	14.9025	-2.87339	0.01446	0.0528623	-3.36895	Vdac3	Q60931	0.01446	MI_IZ_vs_MI_remote
-0.49444	16.8201	-2.87066	0.0145323	0.0528689	-3.37379	Nipsnap2	O55126	0.0145323	MI_IZ_vs_MI_remote
-0.510932	14.6312	-2.87134	0.0145145	0.0528689	-3.3726	Dip2b	Q3UH60	0.0145145	MI_IZ_vs_MI_remote
-0.325802	12.8387	-2.87044	0.0145382	0.0528689	-3.37418	Sco1	Q5SUC9	0.0145382	MI_IZ_vs_MI_remote
-0.753172	14.2562	-3.05376	0.0144963	0.0528689	-3.04167	Cd99	Q8VCN6	0.0144963	MI_IZ_vs_MI_remote
-0.480101	15.3447	-2.87134	0.0145145	0.0528689	-3.3726	Ndufa5	Q9CPP6	0.0145145	MI_IZ_vs_MI_remote
0.55743	13.7076	2.86949	0.0145634	0.0529052	-3.37587	U2af1	Q9D883	0.0145634	MI_IZ_vs_MI_remote
-0.350249	12.5761	-2.86596	0.0146578	0.0531469	-3.38213	Eif4a2	P10630	0.0146578	MI_IZ_vs_MI_remote
-0.333262	13.5754	-2.86586	0.0146607	0.0531469	-3.38232	Timm50	Q9D880	0.0146607	MI_IZ_vs_MI_remote
0.702727	11.2925	2.91227	0.0146765	0.0531485	-3.28394	Mical1	Q8VDP3	0.0146765	MI_IZ_vs_MI_remote
0.343833	11.9545	2.8643	0.0147026	0.0531873	-3.38509	Scfd1	Q8BRF7	0.0147026	MI_IZ_vs_MI_remote
-0.546754	11.0057	-2.91022	0.0147295	0.0532292	-3.28745	Cisd3	B1AR13	0.0147295	MI_IZ_vs_MI_remote
-0.390919	13.89	-2.86238	0.0147542	0.0532629	-3.38849	Coa3	Q9D2R6	0.0147542	MI_IZ_vs_MI_remote
-0.542737	15.3785	-2.86096	0.0147926	0.0532901	-3.39101	Hsdl2	Q2TPA8	0.0147926	MI_IZ_vs_MI_remote
0.3722	12.2874	2.86139	0.0147809	0.0532901	-3.39025	Iars1	Q8BU30	0.0147809	MI_IZ_vs_MI_remote
0.326575	14.3304	2.85522	0.0149486	0.0537963	-3.40119	Cct4	P80315	0.0149486	MI_IZ_vs_MI_remote
0.618073	11.5627	2.85431	0.0149735	0.0538301	-3.4028	Acly	Q91V92	0.0149735	MI_IZ_vs_MI_remote
-0.472611	14.768	-2.85029	0.015084	0.0541709	-3.40993	Uqcr10	Q8R1I1	0.015084	MI_IZ_vs_MI_remote
0.802088	11.9198	2.84924	0.0151129	0.0542186	-3.41179	Vamp8	O70404	0.0151129	MI_IZ_vs_MI_remote
0.31245	13.7092	2.84672	0.0151827	0.0544125	-3.41625	Rps10	P63325	0.0151827	MI_IZ_vs_MI_remote
-0.44814	11.2133	-2.89171	0.0152165	0.0544771	-3.31915	Aak1	Q3UHJ0	0.0152165	MI_IZ_vs_MI_remote
-0.699077	17.9043	-2.84427	0.0152509	0.054544	-3.4206	Ckmt2	Q6P8J7	0.0152509	MI_IZ_vs_MI_remote
-0.537301	12.5059	-2.84367	0.0152676	0.0545474	-3.42166	Maoa	Q64133	0.0152676	MI_IZ_vs_MI_remote
-0.416771	17.1826	-2.84298	0.015287	0.0545603	-3.42289	Hspa9	P38647	0.015287	MI_IZ_vs_MI_remote
0.656421	11.2787	2.84213	0.0153109	0.0545893	-3.4244	Ubtf	P25976	0.0153109	MI_IZ_vs_MI_remote
-0.492644	10.4516	-2.94392	0.0153542	0.0546876	-3.1868	Sdhaf1	Q3U276	0.0153542	MI_IZ_vs_MI_remote
-0.417213	12.3962	-2.83556	0.0154956	0.0551344	-3.43602	Slc12a7	Q9WVL3	0.0154956	MI_IZ_vs_MI_remote
-0.638139	16.9249	-2.83244	0.0155844	0.0552799	-3.44156	Casq2	O09161	0.0155844	MI_IZ_vs_MI_remote
1.01666	13.0577	2.93565	0.0155686	0.0552799	-3.36435	Saa1;Saa2	P05367;P05366	0.0155686	MI_IZ_vs_MI_remote
0.29009	13.8414	2.83348	0.0155547	0.0552799	-3.43971	Cct5	P80316	0.0155547	MI_IZ_vs_MI_remote
0.494489	11.1073	2.93391	0.0156141	0.0553285	-3.24925	Gmfb;Gmfg	Q9ERL7;Q9CQI3	0.0156141	MI_IZ_vs_MI_remote
-0.548428	15.7811	-2.82472	0.0158058	0.0559506	-3.45522	Acad12	D3Z7X0	0.0158058	MI_IZ_vs_MI_remote
-0.499204	21.0625	-2.82169	0.0158936	0.0561672	-3.46058	Acta1;Acta2;Actb;Actc1;Actg1;Actg2	P63268;P62737;P60710;P68134;P68033;P63260	0.0158936	MI_IZ_vs_MI_remote
0.855397	14.4228	2.82149	0.0158994	0.0561672	-3.46094	Aqp1	Q02013	0.0158994	MI_IZ_vs_MI_remote
-0.601777	19.1604	-2.81966	0.0159527	0.056298	-3.46418	Myh4;Myh6;Myh7;Myh8	Q91Z83;Q02566;Q5SX39;P13542	0.0159527	MI_IZ_vs_MI_remote
0.476475	11.7664	2.8185	0.0159867	0.0563604	-3.46624	Pak1;Pak2;Pak3	Q61036;Q8CIN4;O88643	0.0159867	MI_IZ_vs_MI_remote
0.535794	14.4654	2.8177	0.01601	0.0563853	-3.46765	Snrpa	Q62189	0.01601	MI_IZ_vs_MI_remote
0.566648	11.5242	2.81238	0.0161665	0.0568206	-3.47706	Sp100	O35892	0.0161665	MI_IZ_vs_MI_remote
0.55625	11.5228	2.81291	0.0161509	0.0568206	-3.47613	Stk24	Q99KH8	0.0161509	MI_IZ_vs_MI_remote
0.416947	13.1832	2.80967	0.0162467	0.0570446	-3.48185	Rab5c	P35278	0.0162467	MI_IZ_vs_MI_remote
0.447545	15.223	2.80797	0.0162973	0.0571644	-3.48486	Ddx17;Ddx5	Q501J6;Q61656	0.0162973	MI_IZ_vs_MI_remote
0.421704	12.0999	2.80619	0.0163503	0.0572922	-3.48801	Snrnp200	Q6P4T2	0.0163503	MI_IZ_vs_MI_remote
-0.337435	12.7482	-2.80384	0.0164207	0.0573646	-3.49216	Ppp1r12c	Q3UMT1	0.0164207	MI_IZ_vs_MI_remote
-0.935636	15.3349	-2.80399	0.0164163	0.0573646	-3.4919	Ckmt1;Ckmt2	Q6P8J7;P30275	0.0164163	MI_IZ_vs_MI_remote
-1.30356	11.3689	-2.90466	0.0163992	0.0573646	-3.25096	Slit3	Q9WVB4	0.0163992	MI_IZ_vs_MI_remote
-0.421668	13.398	-2.80076	0.0165134	0.0575724	-3.49761	Mmut	P16332	0.0165134	MI_IZ_vs_MI_remote
-0.522833	12.4295	-2.80118	0.0165006	0.0575724	-3.49686	Wars1	P32921	0.0165006	MI_IZ_vs_MI_remote
-0.502982	12.1381	-2.79952	0.0165508	0.0576447	-3.4998	Gbe1	Q9D6Y9	0.0165508	MI_IZ_vs_MI_remote
-0.330081	13.5711	-2.79862	0.0165781	0.0576818	-3.50139	Clpp	O88696	0.0165781	MI_IZ_vs_MI_remote
0.993757	14.7995	2.79663	0.0166385	0.0578337	-3.50491	Plg	P20918	0.0166385	MI_IZ_vs_MI_remote
-0.661024	14.7074	-2.7951	0.0166851	0.0579375	-3.50761	Actn1;Actn2;Actn4	P57780;Q7TPR4;Q9JI91	0.0166851	MI_IZ_vs_MI_remote
-0.746452	12.5342	-2.79252	0.0167639	0.0580949	-3.51217	Aldh1l2	Q8K009	0.0167639	MI_IZ_vs_MI_remote
0.390136	12.85	2.79272	0.0167579	0.0580949	-3.51182	Eif3g	Q9Z1D1	0.0167579	MI_IZ_vs_MI_remote
-0.385713	11.6131	-2.78926	0.0168642	0.0583838	-3.51793	Tns1;Tns2;Tns3	E9Q0S6;Q5SSZ5;Q8CGB6	0.0168642	MI_IZ_vs_MI_remote
0.40898	12.5658	2.78724	0.0169266	0.0585414	-3.52151	Dpy30	Q99LT0	0.0169266	MI_IZ_vs_MI_remote
0.33411	14.3065	2.78613	0.016961	0.0585433	-3.52347	Rps4x	P62702	0.016961	MI_IZ_vs_MI_remote
-0.413677	11.5314	-2.78661	0.0169459	0.0585433	-3.5226	Sync	Q9EPM5	0.0169459	MI_IZ_vs_MI_remote
-0.575468	15.9837	-2.78476	0.0170034	0.0586313	-3.52588	Ndufa9	Q9DC69	0.0170034	MI_IZ_vs_MI_remote
-0.276744	13.7598	-2.78272	0.0170669	0.0587916	-3.52948	Ctnnb1	Q02248	0.0170669	MI_IZ_vs_MI_remote
0.691067	11.7181	2.82525	0.0171024	0.0588552	-3.49782	Rbm22	Q8BHS3	0.0171024	MI_IZ_vs_MI_remote
0.324404	14.0771	2.78096	0.0171219	0.0588641	-3.5326	Ran;Rasl2-9	Q61820;P62827	0.0171219	MI_IZ_vs_MI_remote
0.349909	12.6099	2.77908	0.0171807	0.0589604	-3.5359	Ddx17	Q501J6	0.0171807	MI_IZ_vs_MI_remote
-0.541309	13.473	-2.77898	0.017184	0.0589604	-3.53609	Cox20	Q9D7J4	0.017184	MI_IZ_vs_MI_remote
-0.729559	12.444	-3.16263	0.017242	0.0591008	-2.92785	Met	P16056	0.017242	MI_IZ_vs_MI_remote
-0.405207	14.282	-2.77648	0.0172626	0.0591128	-3.5405	Mccc2	Q3ULD5	0.0172626	MI_IZ_vs_MI_remote
-0.382498	12.2803	-2.81786	0.0173261	0.0592718	-3.44542	Coq4	Q8BGB8	0.0173261	MI_IZ_vs_MI_remote
0.696103	14.9309	2.76928	0.0174912	0.0597773	-3.55321	Calm1;Calm2;Calm3;Tnnc2	P20801;P0DP26;P0DP28;P0DP27	0.0174912	MI_IZ_vs_MI_remote
-0.803969	16.3191	-2.76559	0.0176094	0.0601219	-3.55971	Actn2;Actn3	O88990;Q9JI91	0.0176094	MI_IZ_vs_MI_remote
-0.29569	13.4991	-2.76257	0.0177068	0.0603951	-3.56504	Ugp2	Q91ZJ5	0.0177068	MI_IZ_vs_MI_remote
0.506126	12.8963	2.7608	0.017764	0.0604116	-3.56815	Api5	O35841	0.017764	MI_IZ_vs_MI_remote
-0.622749	17.1891	-2.76087	0.0177618	0.0604116	-3.56804	Mb	P04247	0.0177618	MI_IZ_vs_MI_remote
0.921813	10.611	2.92547	0.017759	0.0604116	-3.28078	Efhd1;Efhd2	Q9D8Y0;Q9D4J1	0.017759	MI_IZ_vs_MI_remote
0.60817	11.5743	2.75446	0.017971	0.0610554	-3.57934	Cd200	O54901	0.017971	MI_IZ_vs_MI_remote
-0.579002	17.5431	-2.75096	0.0180862	0.0613866	-3.5855	Fh	P97807	0.0180862	MI_IZ_vs_MI_remote
-0.498131	12.0494	-2.74728	0.0182082	0.0617402	-3.59199	Mapt	P10637	0.0182082	MI_IZ_vs_MI_remote
0.337469	14.4042	2.74653	0.0182331	0.0617643	-3.59331	Wdr1	O88342	0.0182331	MI_IZ_vs_MI_remote
-0.346175	13.4727	-2.7458	0.0182573	0.0617858	-3.59459	Ccdc90b	Q8C3X2	0.0182573	MI_IZ_vs_MI_remote
-0.71598	18.2711	-2.74512	0.01828	0.0618021	-3.59579	Atp5pd	Q9DCX2	0.01828	MI_IZ_vs_MI_remote
-0.566161	15.72	-2.74302	0.0183504	0.0619797	-3.5995	Ndufs7	Q9DC70	0.0183504	MI_IZ_vs_MI_remote
-0.470097	11.9093	-2.83453	0.0184489	0.0622515	-3.36549	Trim54	Q9ERP3	0.0184489	MI_IZ_vs_MI_remote
0.313724	13.3365	2.73847	0.0185033	0.0623745	-3.6075	Eif3a	P23116	0.0185033	MI_IZ_vs_MI_remote
-0.534985	16.5506	-2.73769	0.0185297	0.0624026	-3.60887	Suclg1	Q9WUM5	0.0185297	MI_IZ_vs_MI_remote
1.08107	15.9249	2.73713	0.0185486	0.0624056	-3.60986	Hbb-b1;Hbb-bs	P02088;A8DUK4	0.0185486	MI_IZ_vs_MI_remote
0.687335	12.4021	2.82999	0.0185903	0.0624244	-3.37291	H2-Q10;H2-Q4;H2-Q6;H2-Q7;H2-Q8;H2-Q9	P14430;P01898;P14431;Q8HWB2;P79568;P14429	0.0185903	MI_IZ_vs_MI_remote
-0.621484	17.8672	-2.73613	0.0185826	0.0624244	-3.61162	Acadl	P51174	0.0185826	MI_IZ_vs_MI_remote
0.367022	14.0127	2.73444	0.01864	0.0625306	-3.61459	Shmt2	Q9CZN7	0.01864	MI_IZ_vs_MI_remote
0.382085	12.8793	2.73296	0.0186905	0.0625874	-3.61721	Khdrbs1	Q60749	0.0186905	MI_IZ_vs_MI_remote
-0.474308	12.4127	-2.73288	0.0186931	0.0625874	-3.61734	Tmem70	Q921N7	0.0186931	MI_IZ_vs_MI_remote
-0.847639	13.1748	-2.72985	0.0187968	0.0626923	-3.62267	Neb;Nebl	A0A571BF58;Q0II04	0.0187968	MI_IZ_vs_MI_remote
0.317217	15.5165	2.73062	0.0187704	0.0626923	-3.62131	Rps8	P62242	0.0187704	MI_IZ_vs_MI_remote
0.68607	18.5184	2.73003	0.0187905	0.0626923	-3.62235	H3-3b;H3-5;H3c11;H3c15	P84244;P02301;P84228;P68433	0.0187905	MI_IZ_vs_MI_remote
-0.57346	12.1736	-2.73044	0.0187765	0.0626923	-3.62163	Armc1	Q9D7A8	0.0187765	MI_IZ_vs_MI_remote
0.315509	13.6016	2.7284	0.0188464	0.0627286	-3.62521	Ddx3x	Q62167	0.0188464	MI_IZ_vs_MI_remote
0.505419	11.5664	2.82136	0.0188621	0.0627286	-3.55365	Pes1	Q9EQ61	0.0188621	MI_IZ_vs_MI_remote
-0.382349	14.6642	-2.72865	0.0188379	0.0627286	-3.62478	Timm9	Q9WV98	0.0188379	MI_IZ_vs_MI_remote
0.48203	15.1563	2.72685	0.0189001	0.062755	-3.62795	Srsf3	P84104	0.0189001	MI_IZ_vs_MI_remote
-0.570719	17.5465	-2.72667	0.0189063	0.062755	-3.62827	Sdha	Q8K2B3	0.0189063	MI_IZ_vs_MI_remote
0.412967	12.5169	2.72229	0.0190578	0.0631975	-3.63596	Tcea1	P10711	0.0190578	MI_IZ_vs_MI_remote
-0.410566	12.5034	-2.72076	0.0191112	0.0633072	-3.63866	Mypn	Q5DTJ9	0.0191112	MI_IZ_vs_MI_remote
0.477455	11.2682	2.72029	0.0191275	0.0633072	-3.63948	Sfxn1	Q99JR1	0.0191275	MI_IZ_vs_MI_remote
-0.323177	13.3117	-2.71798	0.0192084	0.0635143	-3.64354	Fxr1	Q61584	0.0192084	MI_IZ_vs_MI_remote
-0.619456	17.5241	-2.71404	0.019347	0.0639115	-3.65047	Myh1;Myh10;Myh11;Myh13;Myh14;Myh15;Myh2;Myh3;Myh4;Myh6;Myh7;Myh7b;Myh8;Myh9	Q91Z83;B1AR69;G3UW82;Q61879;O08638;Q6URW6;Q02566;E9Q264;P13541;Q5SX39;P13542;A2AQP0;Q8VDD5;Q5SX40	0.019347	MI_IZ_vs_MI_remote
1.12061	11.5264	2.955	0.0194311	0.0641281	-3.31067	Sting1	Q3TBT3	0.0194311	MI_IZ_vs_MI_remote
0.37933	13.9351	2.71065	0.019467	0.0641777	-3.65642	Eif3e	P60229	0.019467	MI_IZ_vs_MI_remote
0.315334	13.3043	2.7102	0.0194832	0.0641777	-3.65722	Syncrip	Q7TMK9	0.0194832	MI_IZ_vs_MI_remote
0.455711	12.6069	2.70914	0.0195206	0.0642399	-3.65907	Ap1m1	P35585	0.0195206	MI_IZ_vs_MI_remote
-0.370137	13.2678	-2.7067	0.0196077	0.0644651	-3.66336	Me1	P06801	0.0196077	MI_IZ_vs_MI_remote
0.321838	15.5751	2.70595	0.0196348	0.064493	-3.66469	Pdia3	P27773	0.0196348	MI_IZ_vs_MI_remote
0.452613	10.8263	2.74559	0.0196743	0.0645614	-3.56863	Szrd1	Q6NXN1	0.0196743	MI_IZ_vs_MI_remote
-0.615271	18.3617	-2.70103	0.0198116	0.0648538	-3.67332	Cox5a	P12787	0.0198116	MI_IZ_vs_MI_remote
-0.446276	12.2547	-2.70081	0.0198196	0.0648538	-3.6737	Mtfr1l	Q9CWE0	0.0198196	MI_IZ_vs_MI_remote
-0.517917	11.748	-2.70171	0.0197872	0.0648538	-3.67213	Echdc1	Q9D9V3	0.0197872	MI_IZ_vs_MI_remote
0.502593	10.6103	2.73977	0.0198768	0.0649797	-3.6442	Cwc15	Q9JHS9	0.0198768	MI_IZ_vs_MI_remote
0.789759	13.4589	2.78771	0.0199602	0.0651909	-3.48909	Rap1b	Q99JI6	0.0199602	MI_IZ_vs_MI_remote
-0.554412	17.5181	-2.69585	0.0199997	0.0652583	-3.68241	Ndufs1	Q91VD9	0.0199997	MI_IZ_vs_MI_remote
0.818934	10.3642	3.22143	0.0200721	0.0654327	-2.98637	Sirpa	P97797	0.0200721	MI_IZ_vs_MI_remote
-0.381365	12.9327	-2.6933	0.0200932	0.0654378	-3.6869	Dcakd	Q8BHC4	0.0200932	MI_IZ_vs_MI_remote
0.946592	11.8131	2.84725	0.0201115	0.0654378	-3.40305	Aloxe3	Q9WV07	0.0201115	MI_IZ_vs_MI_remote
-0.4533	12.8944	-2.69198	0.0201413	0.0654733	-3.6892	Rdh14	Q9ERI6	0.0201413	MI_IZ_vs_MI_remote
-0.390236	11.6426	-2.6891	0.0202476	0.0657572	-3.69426	Inpp5a	Q7TNC9	0.0202476	MI_IZ_vs_MI_remote
-0.46962	11.7169	-2.77842	0.0202748	0.0657837	-3.50431	Abcc9	P70170	0.0202748	MI_IZ_vs_MI_remote
0.726327	10.5162	2.72675	0.020337	0.0658006	-3.66643	Pycr1;Pycr2	Q922Q4;Q922W5	0.020337	MI_IZ_vs_MI_remote
-0.534515	17.9256	-2.68708	0.0203223	0.0658006	-3.6978	Atp5po	Q9DB20	0.0203223	MI_IZ_vs_MI_remote
-0.390065	13.191	-2.68736	0.0203119	0.0658006	-3.69731	Arpc1a	Q9R0Q6	0.0203119	MI_IZ_vs_MI_remote
0.466868	13.5758	2.68571	0.0203732	0.0658562	-3.70021	Snrnp70	Q62376	0.0203732	MI_IZ_vs_MI_remote
-0.598373	14.1113	-2.68451	0.0204177	0.0659384	-3.70231	Pygl;Pygm	Q9ET01;Q9WUB3	0.0204177	MI_IZ_vs_MI_remote
0.392235	15.852	2.68307	0.0204712	0.0660495	-3.70482	Hsp90aa1	P07901	0.0204712	MI_IZ_vs_MI_remote
-0.395464	12.2464	-2.68245	0.0204947	0.0660638	-3.70593	Mrpl28	Q9D1B9	0.0204947	MI_IZ_vs_MI_remote
0.302037	11.8049	2.68179	0.0205193	0.0660816	-3.70708	Sars1	P26638	0.0205193	MI_IZ_vs_MI_remote
-0.887265	11.38	-2.77045	0.0205482	0.0661134	-3.47003	Trim55	G3X8Y1	0.0205482	MI_IZ_vs_MI_remote
0.316879	13.6981	2.67934	0.0206108	0.0661304	-3.71136	Ganab	Q8BHN3	0.0206108	MI_IZ_vs_MI_remote
-0.357921	13.3961	-2.67986	0.0205913	0.0661304	-3.71045	Unc45b	Q8CGY6	0.0205913	MI_IZ_vs_MI_remote
-0.539253	14.0909	-2.6797	0.0205975	0.0661304	-3.71074	Mgst3	Q9CPU4	0.0205975	MI_IZ_vs_MI_remote
-0.569418	14.3976	-2.67636	0.0207231	0.0664291	-3.71658	Mtfp1	Q9CRB8	0.0207231	MI_IZ_vs_MI_remote
0.4268	11.8384	2.6742	0.0208049	0.0666294	-3.72037	U2af2	P26369	0.0208049	MI_IZ_vs_MI_remote
0.487751	12.8819	2.67296	0.0208523	0.0667195	-3.72255	Pgam1	Q9DBJ1	0.0208523	MI_IZ_vs_MI_remote
0.39013	11.7824	2.67224	0.0208794	0.0667231	-3.7238	Kpna4	O35343	0.0208794	MI_IZ_vs_MI_remote
-0.628664	20.3387	-2.67191	0.0208919	0.0667231	-3.72438	Myl10;Myl2	P51667;Q62082	0.0208919	MI_IZ_vs_MI_remote
0.482211	11.959	2.70702	0.0210549	0.0669692	-3.6342	Srsf5	O35326	0.0210549	MI_IZ_vs_MI_remote
0.270971	15.5207	2.66684	0.0210859	0.0669692	-3.73326	Rpsa	P14206	0.0210859	MI_IZ_vs_MI_remote
0.316586	14.1855	2.66794	0.0210438	0.0669692	-3.73134	Ppib	P24369	0.0210438	MI_IZ_vs_MI_remote
-0.726133	10.3069	-2.81794	0.0210733	0.0669692	-3.40814	Them6	Q80ZW2	0.0210733	MI_IZ_vs_MI_remote
0.634506	11.4791	2.66755	0.0210589	0.0669692	-3.73203	Ifitm3	Q9CQW9	0.0210589	MI_IZ_vs_MI_remote
0.333311	11.8748	2.66806	0.0210391	0.0669692	-3.73112	Mbnl1;Mbnl2	Q9JKP5;Q8C181	0.0210391	MI_IZ_vs_MI_remote
-0.470352	13.1291	-2.70568	0.0211044	0.0669692	-3.63647	Gys1	Q9Z1E4	0.0211044	MI_IZ_vs_MI_remote
0.457062	16.1827	2.66561	0.0211332	0.0669791	-3.73541	H2bc12;H2bc14;H2bc15;H2bc21;H2bc3;H2bc8;H2bc9;H2bu1;H2bu2;Hist1h2bp;Hist2h2bb	P10854;Q64525;Q64475;Q6ZWY9;Q64524;Q64478;Q9D2U9;Q8CGP2;Q8CGP0;P10853;Q8CGP1	0.0211332	MI_IZ_vs_MI_remote
0.527403	9.96118	2.66528	0.0211462	0.0669791	-3.736	Jagn1	Q5XKN4	0.0211462	MI_IZ_vs_MI_remote
-0.456752	12.4333	-2.66305	0.0212322	0.0671899	-3.7399	Fahd2	Q3TC72	0.0212322	MI_IZ_vs_MI_remote
-1.11093	12.1295	-2.74929	0.0212932	0.0673216	-3.50452	Ppp2r3a;Ppp2r3d	Q9Z176;B2RXC8	0.0212932	MI_IZ_vs_MI_remote
1.55352	11.8714	2.80829	0.0214001	0.0675978	-3.56565	Lgals3	P16110	0.0214001	MI_IZ_vs_MI_remote
0.422797	12.5878	2.65703	0.0214664	0.0677455	-3.75044	Prrc2c	Q3TLH4	0.0214664	MI_IZ_vs_MI_remote
-0.558415	16.822	-2.65608	0.0215033	0.0678001	-3.75209	Sucla2	Q9Z2I9	0.0215033	MI_IZ_vs_MI_remote
0.706384	11.0206	2.6932	0.0215729	0.0679574	-3.65767	Adam10	O35598	0.0215729	MI_IZ_vs_MI_remote
0.55688	11.8502	2.65268	0.0216372	0.0680721	-3.75804	Rbm25	B2RY56	0.0216372	MI_IZ_vs_MI_remote
-0.574194	19.6744	-2.65239	0.0216486	0.0680721	-3.75855	Slc25a4	P48962	0.0216486	MI_IZ_vs_MI_remote
-0.627976	16.865	-2.65036	0.0217289	0.0682627	-3.76211	Vdac1	Q60932	0.0217289	MI_IZ_vs_MI_remote
-0.532897	14.2378	-2.6475	0.0218422	0.0685563	-3.7671	Bckdha	P50136	0.0218422	MI_IZ_vs_MI_remote
-0.596737	16.0483	-2.64289	0.0220265	0.0690723	-3.77516	Ndufs3	Q9DCT2	0.0220265	MI_IZ_vs_MI_remote
-0.394367	12.1592	-2.67681	0.0222034	0.069564	-3.68547	Actl11	Q9D5V1	0.0222034	MI_IZ_vs_MI_remote
0.439418	11.4323	2.63748	0.0222443	0.0695663	-3.7846	Sf3a2	Q62203	0.0222443	MI_IZ_vs_MI_remote
-0.671834	10.9298	-2.97462	0.0222433	0.0695663	-3.17614	Fars2	Q99M01	0.0222433	MI_IZ_vs_MI_remote
-0.55	12.3395	-2.67461	0.0222894	0.0696443	-3.6892	Trdn	E9Q9K5	0.0222894	MI_IZ_vs_MI_remote
0.936289	13.5007	2.63019	0.0225416	0.0703687	-3.79733	Igkc	P01837	0.0225416	MI_IZ_vs_MI_remote
0.512041	12.0487	2.66563	0.0226438	0.0704339	-3.70441	Gpld1	O70362	0.0226438	MI_IZ_vs_MI_remote
0.812682	11.5744	2.85236	0.0226398	0.0704339	-3.46284	Ermp1	Q3UVK0	0.0226398	MI_IZ_vs_MI_remote
-0.383064	11.9482	-2.62831	0.0226189	0.0704339	-3.80061	Ptges2	Q8BWM0	0.0226189	MI_IZ_vs_MI_remote
0.512271	12.2713	2.62881	0.0225982	0.0704339	-3.79973	Bst2	Q8R2Q8	0.0225982	MI_IZ_vs_MI_remote
-0.436998	12.2136	-2.62481	0.0227633	0.0707101	-3.80671	Myh1;Myh2;Myh6;Myh7	Q91Z83;G3UW82;Q02566;Q5SX40	0.0227633	MI_IZ_vs_MI_remote
-0.496518	14.1557	-2.62457	0.0227735	0.0707101	-3.80714	Mccc1	Q99MR8	0.0227735	MI_IZ_vs_MI_remote
1.02355	18.497	2.62062	0.0229379	0.0710933	-3.81404	Hba	P01942	0.0229379	MI_IZ_vs_MI_remote
0.839612	12.0982	2.76517	0.0229254	0.0710933	-3.53139	Denr	Q9CQJ6	0.0229254	MI_IZ_vs_MI_remote
-0.319993	12.4562	-2.6147	0.0231862	0.0717985	-3.82435	Lap3	Q9CPY7	0.0231862	MI_IZ_vs_MI_remote
0.341682	12.1941	2.61126	0.0233319	0.0720562	-3.83035	Yars1	Q91WQ3	0.0233319	MI_IZ_vs_MI_remote
1.13522	11.692	2.83248	0.0233229	0.0720562	-3.53903	Nmrk2	Q9D7C9	0.0233229	MI_IZ_vs_MI_remote
0.541766	12.9725	2.61149	0.0233219	0.0720562	-3.82994	Tmem43	Q9DBS1	0.0233219	MI_IZ_vs_MI_remote
-0.370095	12.7251	-2.60948	0.0234076	0.0722255	-3.83345	Mcur1	Q9CXD6	0.0234076	MI_IZ_vs_MI_remote
-0.601301	19.1413	-2.60865	0.0234428	0.0722697	-3.83489	Aco2	Q99KI0	0.0234428	MI_IZ_vs_MI_remote
-0.523127	15.5966	-2.60627	0.0235443	0.0724279	-3.83903	Ndufv3	Q8BK30	0.0235443	MI_IZ_vs_MI_remote
-0.40217	13.5097	-2.60598	0.0235568	0.0724279	-3.83954	Coq6	Q8R1S0	0.0235568	MI_IZ_vs_MI_remote
-0.392799	12.7226	-2.60621	0.023547	0.0724279	-3.83913	Mrpl45	Q9D0Q7	0.023547	MI_IZ_vs_MI_remote
0.283841	12.727	2.60468	0.0236125	0.0725346	-3.8418	Eif5	P59325	0.0236125	MI_IZ_vs_MI_remote
-0.679684	10.921	-2.68735	0.023634	0.0725362	-3.60532	Alpk3	Q924C5	0.023634	MI_IZ_vs_MI_remote
0.753757	9.83532	2.68663	0.023663	0.0725609	-3.71015	Pds5a	Q6A026	0.023663	MI_IZ_vs_MI_remote
-0.451896	11.1755	-2.63895	0.0237305	0.0726391	-3.74955	Fsd2	Q8BZ52	0.0237305	MI_IZ_vs_MI_remote
0.515898	12.1877	2.60203	0.0237269	0.0726391	-3.84642	Tubb6	Q922F4	0.0237269	MI_IZ_vs_MI_remote
0.566136	13.083	2.59986	0.0238207	0.0727967	-3.8502	Isg15	Q64339	0.0238207	MI_IZ_vs_MI_remote
0.508805	12.5219	2.59978	0.023824	0.0727967	-3.85033	Slc25a24	Q8BMD8	0.023824	MI_IZ_vs_MI_remote
-0.469328	13.8147	-2.59846	0.0238811	0.072907	-3.85262	Ppa2	Q91VM9	0.0238811	MI_IZ_vs_MI_remote
-0.505585	14.8366	-2.596	0.0239883	0.0731695	-3.85691	Crat	P47934	0.0239883	MI_IZ_vs_MI_remote
-0.668693	12.4818	-2.59464	0.0240479	0.073188	-3.85928	Pura	P42669	0.0240479	MI_IZ_vs_MI_remote
0.798365	21.2419	2.59441	0.0240578	0.073188	-3.85967	H2ac1;H2ac11;H2ac12;H2ac13;H2ac15;H2ac20;H2ac21;H2ac4;H2ac6;H2ac7;H2ac8;H2aj;H2aw;H2ax;H2az1;H2az2;Hist1h2af;Hist1h2an;Hist1h2ao;Hist1h2ap;Hist2h2aa2	Q8CGP6;C0HKE3;Q8CGP7;Q3THW5;Q64523;C0HKE6;Q8CGP5;C0HKE8;C0HKE1;Q8R1M2;C0HKE9;C0HKE5;Q64522;Q8BFU2;C0HKE2;C0HKE7;P27661;Q8CGP4;P0C0S6;Q6GSS7;C0HKE4	0.0240578	MI_IZ_vs_MI_remote
1.00123	11.4187	2.91811	0.0240348	0.073188	-3.27145	Pygl	Q9ET01	0.0240348	MI_IZ_vs_MI_remote
-0.409059	11.1066	-2.63032	0.024093	0.073231	-3.76414	Acaca;Acacb	Q5SWU9;E9Q4Z2	0.024093	MI_IZ_vs_MI_remote
0.688686	12.1363	2.67341	0.0241958	0.0734788	-3.79788	Apon	G3X9D6	0.0241958	MI_IZ_vs_MI_remote
1.60092	12.0951	2.72962	0.0242663	0.0736283	-3.68981	Itgb3	O54890	0.0242663	MI_IZ_vs_MI_remote
-0.399462	12.1329	-2.62415	0.0243558	0.0737062	-3.77458	Lsmem2	A0A571BE98	0.0243558	MI_IZ_vs_MI_remote
0.307707	13.9418	2.58781	0.0243485	0.0737062	-3.87116	Cct2	P80314	0.0243485	MI_IZ_vs_MI_remote
-0.303802	13.7559	-2.58799	0.0243404	0.0737062	-3.87085	Acad9	Q8JZN5	0.0243404	MI_IZ_vs_MI_remote
-0.433767	13.4148	-2.62026	0.0245227	0.0741462	-3.78114	Slirp	Q9D8T7	0.0245227	MI_IZ_vs_MI_remote
-0.314937	13.7873	-2.58254	0.0245828	0.0741984	-3.88032	Itga7	Q61738	0.0245828	MI_IZ_vs_MI_remote
0.294824	12.2969	2.58297	0.0245634	0.0741984	-3.87957	Kars1	Q99MN1	0.0245634	MI_IZ_vs_MI_remote
0.806224	11.1593	2.79572	0.0246427	0.0742603	-3.36172	Rnf213	E9Q555	0.0246427	MI_IZ_vs_MI_remote
0.457472	12.8975	2.58064	0.0246676	0.0742603	-3.88362	Ewsr1	Q61545	0.0246676	MI_IZ_vs_MI_remote
0.522322	10.1164	2.6624	0.0246485	0.0742603	-3.69395	Tppp3	Q9CRB6	0.0246485	MI_IZ_vs_MI_remote
-0.390595	14.2709	-2.57913	0.0247352	0.0743991	-3.88623	Gfm1	Q8K0D5	0.0247352	MI_IZ_vs_MI_remote
-0.452141	10.3698	-2.65477	0.0249677	0.0750333	-3.70641	Vamp2	P63044	0.0249677	MI_IZ_vs_MI_remote
-0.459574	14.831	-2.57001	0.0251488	0.0755119	-3.90208	Gga3	Q8BMI3	0.0251488	MI_IZ_vs_MI_remote
0.581892	13.4741	2.56939	0.0251769	0.0755308	-3.90315	Eif4a1;Eif4a2;Eif4a3;Eif4a3l1;Eif4a3l2	P10630;E9PV04;Q91VC3;A0A0N4SVP8;P60843	0.0251769	MI_IZ_vs_MI_remote
0.300208	15.1266	2.5641	0.02542	0.0760661	-3.91232	Rps16	P14131	0.02542	MI_IZ_vs_MI_remote
0.54576	13.2934	2.56407	0.0254213	0.0760661	-3.91237	Gm7298;Mug1;Mug2	P28665;A0A0N4SVU1;P28666	0.0254213	MI_IZ_vs_MI_remote
-0.456958	11.2743	-2.6006	0.0253838	0.0760661	-3.81431	Mrpl16	Q99N93	0.0253838	MI_IZ_vs_MI_remote
-0.277091	13.6966	-2.56359	0.0254435	0.0760667	-3.9132	Timm44	O35857	0.0254435	MI_IZ_vs_MI_remote
-0.700846	15.5028	-2.56168	0.025532	0.076244	-3.91652	Cox6a2	P43023	0.025532	MI_IZ_vs_MI_remote
-0.429629	12.6952	-2.56136	0.0255468	0.076244	-3.91707	Mrpl37	Q921S7	0.0255468	MI_IZ_vs_MI_remote
-0.534461	15.4819	-2.55932	0.0256417	0.0764612	-3.92061	Oxct1	Q9D0K2	0.0256417	MI_IZ_vs_MI_remote
-0.423607	16.5999	-2.55847	0.0256811	0.076513	-3.92208	Slc25a20	Q9Z2Z6	0.0256811	MI_IZ_vs_MI_remote
0.462259	11.6241	2.6359	0.025774	0.0767237	-3.68887	Ddx3x;Ddx3y	Q62095;Q62167	0.025774	MI_IZ_vs_MI_remote
0.888905	9.29395	2.63313	0.0258947	0.0770169	-3.74167	Ppp2r2a;Ppp2r2d	Q6P1F6;Q925E7	0.0258947	MI_IZ_vs_MI_remote
-1.23282	12.2004	-2.63137	0.0259715	0.077083	-3.69622	Plekha7	Q3UIL6	0.0259715	MI_IZ_vs_MI_remote
-0.489738	18.2323	-2.55267	0.025953	0.077083	-3.93213	Vdac2	Q60930	0.025953	MI_IZ_vs_MI_remote
0.481665	11.6813	2.55202	0.0259838	0.077083	-3.93326	Ica	Q9DBD0	0.0259838	MI_IZ_vs_MI_remote
-0.472952	11.3412	-2.63008	0.026028	0.077148	-3.69831	Tmlhe	Q91ZE0	0.026028	MI_IZ_vs_MI_remote
0.446134	12.9259	2.54889	0.0261319	0.0773237	-3.93869	Col18a1	P39061	0.0261319	MI_IZ_vs_MI_remote
-0.814574	13.0682	-2.54933	0.0261111	0.0773237	-3.93793	Bdh1	Q80XN0	0.0261111	MI_IZ_vs_MI_remote
-0.55862	13.3228	-2.54608	0.0262656	0.077653	-3.94356	Cmc1	Q9CPZ8	0.0262656	MI_IZ_vs_MI_remote
0.496824	12.7586	2.54333	0.0263967	0.0779074	-3.94831	Psmb8	P28063	0.0263967	MI_IZ_vs_MI_remote
-0.538569	14.4733	-2.54356	0.0263859	0.0779074	-3.94792	Auh	Q9JLZ3	0.0263859	MI_IZ_vs_MI_remote
0.377618	11.5955	2.54087	0.026515	0.0779617	-3.95257	Parp1	P11103	0.026515	MI_IZ_vs_MI_remote
0.527785	10.5829	2.54062	0.0265272	0.0779617	-3.95301	Lrrfip1;Lrrfip2	Q3UZ39;Q91WK0	0.0265272	MI_IZ_vs_MI_remote
0.55006	11.714	2.74857	0.0264507	0.0779617	-3.57607	Cdsn	Q7TPC1	0.0264507	MI_IZ_vs_MI_remote
-0.391435	12.964	-2.5408	0.0265184	0.0779617	-3.95269	Tbrg4	Q91YM4	0.0265184	MI_IZ_vs_MI_remote
-0.25494	12.8491	-2.54061	0.0265277	0.0779617	-3.95303	Clip1	Q922J3	0.0265277	MI_IZ_vs_MI_remote
-0.501849	17.161	-2.53895	0.0266075	0.0780543	-3.95589	Acsl1	P41216	0.0266075	MI_IZ_vs_MI_remote
0.493871	11.5799	2.53855	0.0266267	0.0780543	-3.95658	Chd4;Chd5	Q6PDQ2;A2A8L1	0.0266267	MI_IZ_vs_MI_remote
-0.553724	20.6232	-2.53855	0.0266268	0.0780543	-3.95658	Myh1;Myh13;Myh2;Myh3;Myh4;Myh6;Myh7;Myh8	Q91Z83;B1AR69;G3UW82;Q02566;P13541;Q5SX39;P13542;Q5SX40	0.0266268	MI_IZ_vs_MI_remote
-0.369373	12.0213	-2.53686	0.0267086	0.0782277	-3.95951	Abcb7	Q61102	0.0267086	MI_IZ_vs_MI_remote
-0.422017	13.7799	-2.53333	0.0268799	0.0786629	-3.9656	Echdc3	Q9D7J9	0.0268799	MI_IZ_vs_MI_remote
0.337037	14.0355	2.53079	0.0270043	0.0789601	-3.97	Rpl14	Q9CR57	0.0270043	MI_IZ_vs_MI_remote
0.33287	13.0043	2.52473	0.0273027	0.0797655	-3.98047	Eif3c	Q8R1B4	0.0273027	MI_IZ_vs_MI_remote
0.39487	12.6241	2.52358	0.0273596	0.0798641	-3.98246	Ftl1;Ftl2	P49945;P29391	0.0273596	MI_IZ_vs_MI_remote
-0.55602	14.3667	-2.59951	0.027404	0.0799264	-3.85273	Vps16	Q920Q4	0.027404	MI_IZ_vs_MI_remote
-0.532224	11.3002	-2.52209	0.0274336	0.0799455	-3.98503	Dmd;Drp2;Utrn	E9Q6R7;Q05AA6;P11531	0.0274336	MI_IZ_vs_MI_remote
0.744948	11.3422	2.55091	0.0276967	0.0806441	-3.89795	F13b	Q07968	0.0276967	MI_IZ_vs_MI_remote
0.397152	13.1725	2.51539	0.027769	0.0807869	-3.9966	Clta	O08585	0.027769	MI_IZ_vs_MI_remote
0.331702	11.2467	2.51485	0.0277961	0.0807977	-3.99753	Tomm34	Q9CYG7	0.0277961	MI_IZ_vs_MI_remote
1.10118	12.3423	2.5141	0.0278341	0.0808064	-3.99883	F10	O88947	0.0278341	MI_IZ_vs_MI_remote
0.588969	12.332	2.51386	0.0278458	0.0808064	-3.99923	Ncstn	P57716	0.0278458	MI_IZ_vs_MI_remote
-0.637132	16.6914	-2.51198	0.0279412	0.0810154	-4.00249	Atp2a2;Atp2a3	Q64518;O55143	0.0279412	MI_IZ_vs_MI_remote
-0.6024	19.1235	-2.51085	0.027998	0.0810443	-4.00442	Hadhb	Q99JY0	0.027998	MI_IZ_vs_MI_remote
0.399475	12.2585	2.51125	0.0279779	0.0810443	-4.00374	Spcs2	Q9CYN2	0.0279779	MI_IZ_vs_MI_remote
0.296276	13.2819	2.5103	0.028026	0.0810577	-4.00537	Gart	Q64737	0.028026	MI_IZ_vs_MI_remote
0.303217	13.3991	2.50841	0.0281222	0.0810651	-4.00863	Capns1	O88456	0.0281222	MI_IZ_vs_MI_remote
-0.442798	11.543	-2.50873	0.0281058	0.0810651	-4.00808	Ptcd3	Q14C51	0.0281058	MI_IZ_vs_MI_remote
1.07538	11.9233	2.54255	0.0281054	0.0810651	-3.97903	Arg1	Q61176	0.0281054	MI_IZ_vs_MI_remote
-0.390784	11.9273	-2.54346	0.0280605	0.0810651	-3.91044	Mrps26	Q80ZS3	0.0280605	MI_IZ_vs_MI_remote
-0.873665	10.1085	-2.58347	0.0281546	0.081091	-3.7738	Chchd1	Q9CQA6	0.0281546	MI_IZ_vs_MI_remote
-0.486893	17.6311	-2.50728	0.0281798	0.081096	-4.01058	Atp5pf	P97450	0.0281798	MI_IZ_vs_MI_remote
0.84396	10.8837	2.63555	0.0282128	0.0811237	-3.73388	Cyba	Q61462	0.0282128	MI_IZ_vs_MI_remote
0.356068	17.8381	2.50195	0.0284534	0.0817473	-4.01977	Hspa1a;Hspa1b;Hspa1l;Hspa2;Hspa5;Hspa8	Q61696;P63017;P17156;P20029;P17879;P16627	0.0284534	MI_IZ_vs_MI_remote
1.42957	10.651	2.93245	0.0285665	0.0818439	-3.23117	Gnai1;Gnai2	P08752;B2RSH2	0.0285665	MI_IZ_vs_MI_remote
0.349658	12.8795	2.49947	0.0285815	0.0818439	-4.02405	Xpo1	Q6P5F9	0.0285815	MI_IZ_vs_MI_remote
-0.52292	14.0975	-2.50045	0.0285306	0.0818439	-4.02235	Maob	Q8BW75	0.0285306	MI_IZ_vs_MI_remote
-0.533574	15.0315	-2.49987	0.0285605	0.0818439	-4.02335	Fam162a	Q9D6U8	0.0285605	MI_IZ_vs_MI_remote
0.561317	11.9437	2.49721	0.0286984	0.0821106	-4.02793	Larp4	Q8BWW4	0.0286984	MI_IZ_vs_MI_remote
-1.00078	11.8312	-2.69079	0.0288545	0.082489	-3.49187	Mdm1	Q9D067	0.0288545	MI_IZ_vs_MI_remote
0.318441	12.7938	2.49337	0.0288986	0.0825157	-4.03454	Pdia4	P08003	0.0288986	MI_IZ_vs_MI_remote
-0.303302	15.7172	-2.49313	0.0289115	0.0825157	-4.03496	Cd36	Q08857	0.0289115	MI_IZ_vs_MI_remote
-0.525459	19.0054	-2.48918	0.0291187	0.0829703	-4.04175	Cox5b	P19536	0.0291187	MI_IZ_vs_MI_remote
-0.651354	16.9008	-2.4894	0.0291073	0.0829703	-4.04138	Ndufs4	Q9CXZ1	0.0291073	MI_IZ_vs_MI_remote
-0.517998	20.5529	-2.48849	0.029155	0.0830055	-4.04293	Myh6	Q02566	0.029155	MI_IZ_vs_MI_remote
0.361927	14.2902	2.48653	0.029259	0.0831866	-4.04632	Calr	P14211	0.029259	MI_IZ_vs_MI_remote
1.91729	13.5137	2.7757	0.0292667	0.0831866	-3.46399	Ctsg	P28293	0.0292667	MI_IZ_vs_MI_remote
0.916036	12.7169	2.67786	0.0294226	0.0835035	-3.72251	Ptx3	P48759	0.0294226	MI_IZ_vs_MI_remote
0.361728	12.1921	2.48338	0.0294264	0.0835035	-4.05174	Mthfd1	Q922D8	0.0294264	MI_IZ_vs_MI_remote
1.05627	10.4653	2.67631	0.0294915	0.083608	-3.68316	Gvin1	Q80SU7	0.0294915	MI_IZ_vs_MI_remote
-0.428759	12.6846	-2.48178	0.0295116	0.083608	-4.05448	Septin8	Q8CHH9	0.0295116	MI_IZ_vs_MI_remote
-0.358303	13.1365	-2.47579	0.0298329	0.0844493	-4.06477	Timm8b	P62077	0.0298329	MI_IZ_vs_MI_remote
-0.546081	18.2432	-2.47231	0.0300213	0.0848446	-4.07075	Got2	P05202	0.0300213	MI_IZ_vs_MI_remote
-0.321601	13.1796	-2.47231	0.0300216	0.0848446	-4.07076	Acad8	Q9D7B6	0.0300216	MI_IZ_vs_MI_remote
0.337397	12.1538	2.46858	0.0302248	0.0853494	-4.07716	Mesd	Q9ERE7	0.0302248	MI_IZ_vs_MI_remote
0.382678	12.0994	2.46621	0.0303544	0.0856454	-4.08122	Ppp1ca	P62137	0.0303544	MI_IZ_vs_MI_remote
0.579822	13.2779	2.46491	0.0304257	0.085707	-4.08345	Cd9	P40240	0.0304257	MI_IZ_vs_MI_remote
-0.501861	12.6438	-2.46498	0.0304218	0.085707	-4.08332	Dnaja4	Q9JMC3	0.0304218	MI_IZ_vs_MI_remote
0.544092	11.1502	2.46061	0.0306633	0.086306	-4.09083	Stxbp3	Q60770	0.0306633	MI_IZ_vs_MI_remote
-0.735296	10.9925	-2.53131	0.0307403	0.0863388	-3.85804	Rhot2	Q8JZN7	0.0307403	MI_IZ_vs_MI_remote
-0.397567	12.2701	-2.45858	0.0307759	0.0863388	-4.0943	Scamp1	Q8K021	0.0307759	MI_IZ_vs_MI_remote
0.448224	12.3283	2.45815	0.0307997	0.0863388	-4.09504	Eif1;Eif1b	Q9CXU9;P48024	0.0307997	MI_IZ_vs_MI_remote
1.11961	11.2623	2.74091	0.03072	0.0863388	-3.49016	Anp32b	Q9EST5	0.03072	MI_IZ_vs_MI_remote
0.281266	12.9601	2.45859	0.0307754	0.0863388	-4.09429	Hnrnpab;Hnrnpdl	Q9Z130;Q99020	0.0307754	MI_IZ_vs_MI_remote
0.366557	12.5029	2.45579	0.0309316	0.0866385	-4.09909	Mta2	Q9R190	0.0309316	MI_IZ_vs_MI_remote
-0.428962	13.0716	-2.45182	0.0311543	0.0871751	-4.10589	Cgnl1	Q6AW69	0.0311543	MI_IZ_vs_MI_remote
-0.36087	12.3258	-2.45148	0.0311735	0.0871751	-4.10648	Serhl	Q9EPB5	0.0311735	MI_IZ_vs_MI_remote
-0.577217	11.1597	-2.48171	0.0312663	0.0872935	-4.0138	Amacr	O09174	0.0312663	MI_IZ_vs_MI_remote
-0.470009	15.1899	-2.44989	0.0312629	0.0872935	-4.10919	Aifm1	Q9Z0X1	0.0312629	MI_IZ_vs_MI_remote
0.388849	12.7193	2.44876	0.0313269	0.0873923	-4.11113	Snrpa1	P57784	0.0313269	MI_IZ_vs_MI_remote
-0.498894	15.5634	-2.44773	0.0313851	0.0874841	-4.11289	Ndufa7	Q9Z1P6	0.0313851	MI_IZ_vs_MI_remote
-0.580265	12.5706	-2.56738	0.0314748	0.0875931	-3.88881	Lamc1;Lamc3	P02468;Q9R0B6	0.0314748	MI_IZ_vs_MI_remote
0.283566	14.4204	2.44649	0.0314558	0.0875931	-4.11502	Pdia6	Q922R8	0.0314558	MI_IZ_vs_MI_remote
0.411799	12.3077	2.44016	0.0318174	0.0882641	-4.12585	Apex1	P28352	0.0318174	MI_IZ_vs_MI_remote
0.459046	11.696	2.44068	0.0317873	0.0882641	-4.12496	Arhgef1	Q61210	0.0317873	MI_IZ_vs_MI_remote
0.376333	13.6372	2.44015	0.0318179	0.0882641	-4.12587	Eng	Q63961	0.0318179	MI_IZ_vs_MI_remote
0.463724	11.9834	2.47282	0.0317567	0.0882641	-4.02864	Baz1b	Q9Z277	0.0317567	MI_IZ_vs_MI_remote
0.794516	12.2215	2.43853	0.0319113	0.0884524	-4.12864	Rab27a	Q9ERI2	0.0319113	MI_IZ_vs_MI_remote
0.497468	11.67	2.43757	0.0319667	0.0885349	-4.13028	Rbm8a;Rbm8a2	Q9CWZ3;A0A0N4SUH6	0.0319667	MI_IZ_vs_MI_remote
0.276543	12.9711	2.43529	0.0320985	0.0888289	-4.13418	Eif3d	O70194	0.0320985	MI_IZ_vs_MI_remote
1.2111	12.1503	2.50358	0.0322099	0.0890659	-4.00889	Hal	P35492	0.0322099	MI_IZ_vs_MI_remote
0.58351	11.0817	2.46399	0.0322508	0.0891081	-4.04335	Hnrnpd;Hnrnpdl;Rbm31y	Q9Z130;Q60668;Q9D3U4	0.0322508	MI_IZ_vs_MI_remote
-0.918348	11.8621	-2.43168	0.0323079	0.0891944	-4.14034	Sntb1	Q99L88	0.0323079	MI_IZ_vs_MI_remote
0.710683	12.1133	2.42735	0.0325614	0.0896173	-4.14774	Cdc5l;Gm32717;Gm9044;Gm9045;Gm9046;Gm9048	A0A1W2P6Q8;A0A1W2P7S8;A0A1W2P7H4;Q6A068;A0A1W2P7Z8;A0A1W2P855	0.0325614	MI_IZ_vs_MI_remote
-0.482339	11.9321	-2.45917	0.0325236	0.0896173	-4.05137	Abat	P61922	0.0325236	MI_IZ_vs_MI_remote
-0.483692	12.1805	-2.45845	0.0325646	0.0896173	-4.05257	Nfia	Q02780	0.0325646	MI_IZ_vs_MI_remote
-0.395492	11.1109	-2.4597	0.0324936	0.0896173	-4.0505	Pbxip1	Q3TVI8	0.0324936	MI_IZ_vs_MI_remote
-0.302954	11.1953	-2.45762	0.0326118	0.089676	-4.05395	Sgce	O70258	0.0326118	MI_IZ_vs_MI_remote
-0.331416	13.1551	-2.42279	0.0328306	0.0902059	-4.15553	Myh10	Q61879	0.0328306	MI_IZ_vs_MI_remote
0.680638	14.6168	2.42057	0.0329621	0.0904954	-4.15931	Apoa2	P09813	0.0329621	MI_IZ_vs_MI_remote
0.460637	14.4777	2.4194	0.0330317	0.0905429	-4.1613	Tmpo	Q61033	0.0330317	MI_IZ_vs_MI_remote
0.500419	11.3235	2.45066	0.0330111	0.0905429	-4.06553	Chd3;Chd4;Chd5	Q6PDQ2;B1AR17;A2A8L1	0.0330111	MI_IZ_vs_MI_remote
0.304967	14.1478	2.4157	0.0332531	0.0910777	-4.16762	Rpl30	P62889	0.0332531	MI_IZ_vs_MI_remote
-0.754291	12.3725	-2.41399	0.0333559	0.0912871	-4.17054	Stard10	Q9JMD3	0.0333559	MI_IZ_vs_MI_remote
-0.352686	13.0831	-2.41299	0.033416	0.0913794	-4.17224	Plin3	Q9DBG5	0.033416	MI_IZ_vs_MI_remote
0.443238	14.0304	2.41115	0.0335269	0.0914701	-4.17538	Itih4	A6X935	0.0335269	MI_IZ_vs_MI_remote
0.462728	14.2105	2.41112	0.0335285	0.0914701	-4.17542	Ptgis	O35074	0.0335285	MI_IZ_vs_MI_remote
-0.25948	15.8227	-2.41132	0.0335165	0.0914701	-4.17508	Lamc1	P02468	0.0335165	MI_IZ_vs_MI_remote
-0.607396	16.2995	-2.41046	0.0335684	0.0915068	-4.17654	Ndufb3	Q9CQZ6	0.0335684	MI_IZ_vs_MI_remote
-0.511188	17.5874	-2.40884	0.0336667	0.0916094	-4.17931	Atp5f1e	P56382	0.0336667	MI_IZ_vs_MI_remote
-0.4894	16.9957	-2.40853	0.0336854	0.0916094	-4.17983	Uqcrh	P99028	0.0336854	MI_IZ_vs_MI_remote
0.760439	10.5181	2.47761	0.0336494	0.0916094	-3.99382	Cstb	Q62426	0.0336494	MI_IZ_vs_MI_remote
-0.42672	11.6063	-2.43733	0.0337896	0.0917488	-4.08771	Fxr1;Fxr2	Q61584;Q9WVR4	0.0337896	MI_IZ_vs_MI_remote
0.698254	15.8523	2.40708	0.0337739	0.0917488	-4.18231	Macroh2a1;Macroh2a2	Q8CCK0;Q9QZQ8	0.0337739	MI_IZ_vs_MI_remote
-0.367237	11.6041	-2.40465	0.033922	0.092036	-4.18645	Prxl2b	Q9DB60	0.033922	MI_IZ_vs_MI_remote
0.37371	13.1281	2.40292	0.0340279	0.0922511	-4.18939	Atp6v1a	P50516	0.0340279	MI_IZ_vs_MI_remote
-0.571784	19.206	-2.40023	0.0341934	0.0926271	-4.19398	Cox6c	Q9CPQ1	0.0341934	MI_IZ_vs_MI_remote
-0.653396	13.587	-2.39955	0.0342351	0.0926494	-4.19513	Tnnt1;Tnnt2	O88346;P50752	0.0342351	MI_IZ_vs_MI_remote
-0.286149	13.8887	-2.39922	0.0342551	0.0926494	-4.19568	Bcam	Q9R069	0.0342551	MI_IZ_vs_MI_remote
-0.724199	15.0081	-2.39839	0.0343068	0.0927167	-4.1971	Pygb;Pygm	Q9WUB3;Q8CI94	0.0343068	MI_IZ_vs_MI_remote
-0.382547	12.1658	-2.42725	0.0343894	0.092837	-4.10443	Ckb	Q04447	0.0343894	MI_IZ_vs_MI_remote
-0.499918	16.478	-2.3968	0.0344049	0.092837	-4.1998	Ivd	Q9JHI5	0.0344049	MI_IZ_vs_MI_remote
0.430032	12.8567	2.3957	0.0344729	0.092948	-4.20167	Atp1b3	P97370	0.0344729	MI_IZ_vs_MI_remote
-0.363713	13.4101	-2.39448	0.0345488	0.0929888	-4.20374	Ryr2;Ryr3	A2AGL3;E9Q401	0.0345488	MI_IZ_vs_MI_remote
1.63906	11.0028	2.78034	0.0345686	0.0929888	-3.52474	Fyb1	O35601	0.0345686	MI_IZ_vs_MI_remote
-0.602977	12.4179	-2.57181	0.0345414	0.0929888	-3.68583	Grb14	Q9JLM9	0.0345414	MI_IZ_vs_MI_remote
0.333454	13.9654	2.39309	0.0346358	0.0930971	-4.20612	Rps12	P63323	0.0346358	MI_IZ_vs_MI_remote
-0.366656	11.8682	-2.39126	0.0347501	0.093332	-4.20923	Lama1;Lama2	P19137;Q60675	0.0347501	MI_IZ_vs_MI_remote
0.473682	11.8448	2.39024	0.0348137	0.0934303	-4.21095	Snx9	Q91VH2	0.0348137	MI_IZ_vs_MI_remote
-0.457487	13.0823	-2.38589	0.0350873	0.0940916	-4.21834	Stab1	Q8R4Y4	0.0350873	MI_IZ_vs_MI_remote
0.413993	11.1176	2.385	0.0351436	0.0941367	-4.21985	Sec24b	Q80ZX0	0.0351436	MI_IZ_vs_MI_remote
0.32466	14.2072	2.38434	0.0351857	0.0941367	-4.22098	Hnrnpl	Q8R081	0.0351857	MI_IZ_vs_MI_remote
-0.53594	16.1974	-2.38454	0.0351731	0.0941367	-4.22064	Uqcrb	Q9D855	0.0351731	MI_IZ_vs_MI_remote
-0.492712	18.4655	-2.38054	0.0354272	0.0947096	-4.22744	Hadha	Q8BMS1	0.0354272	MI_IZ_vs_MI_remote
-0.386033	14.9096	-2.37747	0.0356233	0.0951604	-4.23264	Hspb8	Q9JK92	0.0356233	MI_IZ_vs_MI_remote
0.438237	12.3729	2.4057	0.0357081	0.0953135	-4.14016	Hprt1	P00493	0.0357081	MI_IZ_vs_MI_remote
0.488359	12.0857	2.4046	0.035777	0.0954237	-4.14199	Twf2	Q9Z0P5	0.035777	MI_IZ_vs_MI_remote
0.455609	13.9135	2.37407	0.0358419	0.0955231	-4.23841	Calm1;Calm2;Calm3	P0DP26;P0DP28;P0DP27	0.0358419	MI_IZ_vs_MI_remote
-0.556309	15.609	-2.3723	0.0359561	0.095754	-4.24141	Nop53	Q8BK35	0.0359561	MI_IZ_vs_MI_remote
0.629489	11.8414	2.37159	0.0360021	0.0958026	-4.24261	Iqgap1;Iqgap2;Iqgap3	Q9JKF1;F8VQ29;Q3UQ44	0.0360021	MI_IZ_vs_MI_remote
-0.538322	11.968	-2.39971	0.0360831	0.0959445	-4.15007	Hint3	Q9CPS6	0.0360831	MI_IZ_vs_MI_remote
0.562671	11.5132	2.39802	0.0361897	0.096154	-4.15286	Slk;Stk10	O55098;O54988	0.0361897	MI_IZ_vs_MI_remote
0.446724	12.1404	2.36295	0.0365654	0.0970033	-4.25724	Tcerg1	Q8CGF7	0.0365654	MI_IZ_vs_MI_remote
-0.416229	11.8103	-2.39236	0.0365489	0.0970033	-4.16223	Mrpl44	Q9CY73	0.0365489	MI_IZ_vs_MI_remote
-0.255543	13.4504	-2.35904	0.0368235	0.0976132	-4.26387	Psmb5	O55234	0.0368235	MI_IZ_vs_MI_remote
0.30855	14.6297	2.35641	0.0369975	0.0979996	-4.26831	Rpl12	P35979	0.0369975	MI_IZ_vs_MI_remote
0.708036	19.8827	2.35163	0.0373167	0.0987497	-4.27639	H2bc1;H2bc12;H2bc14;H2bc15;H2bc21;H2bc3;H2bc8;H2bc9;H2bu1;H2bu2;Hist1h2bp;Hist2h2bb	P10854;Q64525;Q64475;Q6ZWY9;P70696;Q64524;Q64478;Q9D2U9;Q8CGP2;Q8CGP0;P10853;Q8CGP1	0.0373167	MI_IZ_vs_MI_remote
-0.42648	13.2425	-2.34877	0.0375089	0.0987497	-4.28123	Nedd8	P29595	0.0375089	MI_IZ_vs_MI_remote
-0.502044	17.1817	-2.349	0.0374932	0.0987497	-4.28083	Des;Gfap;Vim	P31001;P03995;P20152	0.0374932	MI_IZ_vs_MI_remote
-0.376606	16.8234	-2.3493	0.0374728	0.0987497	-4.28032	Tuba4a	P68368	0.0374728	MI_IZ_vs_MI_remote
-0.481744	12.0539	-2.34913	0.0374848	0.0987497	-4.28062	Taco1	Q8K0Z7	0.0374848	MI_IZ_vs_MI_remote
-0.480428	10.818	-2.37923	0.0373949	0.0987497	-4.18391	Mrpl47	Q8K2Y7	0.0373949	MI_IZ_vs_MI_remote
-0.256493	12.851	-2.34976	0.0374421	0.0987497	-4.27955	Dync1li1	Q8R1Q8	0.0374421	MI_IZ_vs_MI_remote
-0.395736	11.6673	-2.37797	0.0374772	0.0987497	-4.18599	Nagk	Q9QZ08	0.0374772	MI_IZ_vs_MI_remote
0.86338	11.4025	2.51608	0.0375891	0.0988856	-3.96348	Plbd1	Q8VCI0	0.0375891	MI_IZ_vs_MI_remote
0.275053	16.9832	2.34171	0.0379869	0.0998563	-4.29314	Hnrnpa2b1	O88569	0.0379869	MI_IZ_vs_MI_remote
0.984267	13.0907	2.50684	0.0381203	0.100131	-3.97723	C4bpa	P08607	0.0381203	MI_IZ_vs_MI_remote
-0.505306	16.6195	-2.33838	0.0382148	0.100151	-4.29876	Atp5mf	P56135	0.0382148	MI_IZ_vs_MI_remote
-0.428841	16.8317	-2.33874	0.0381903	0.100151	-4.29816	Myh1;Myh15;Myh2;Myh3;Myh4;Myh6;Myh7;Myh8	Q91Z83;G3UW82;Q02566;E9Q264;P13541;Q5SX39;P13542;Q5SX40	0.0381903	MI_IZ_vs_MI_remote
0.370157	12.7427	2.33904	0.0381693	0.100151	-4.29764	Prpf8	Q99PV0	0.0381693	MI_IZ_vs_MI_remote
-0.309227	12.7065	-2.33767	0.0382636	0.100194	-4.29996	Rab12	P35283	0.0382636	MI_IZ_vs_MI_remote
0.334194	12.042	2.3373	0.0382889	0.100194	-4.30058	Snw1	Q9CSN1	0.0382889	MI_IZ_vs_MI_remote
-0.272168	12.954	-2.33634	0.0383549	0.10029	-4.3022	Dnaja3	Q99M87	0.0383549	MI_IZ_vs_MI_remote
-0.873088	9.21117	-2.58102	0.0384481	0.100458	-3.66851	Mrpl14	Q9D1I6	0.0384481	MI_IZ_vs_MI_remote
0.349728	12.4385	2.33179	0.0386691	0.100919	-4.30987	Sf3b2	Q3UJB0	0.0386691	MI_IZ_vs_MI_remote
-0.537252	19.1498	-2.3316	0.0386826	0.100919	-4.3102	Acaa2	Q8BWT1	0.0386826	MI_IZ_vs_MI_remote
0.835917	11.4732	2.57588	0.0387281	0.100961	-3.73672	Mcm2	P97310	0.0387281	MI_IZ_vs_MI_remote
-0.339971	12.804	-2.32716	0.0389916	0.101572	-4.31767	Diablo	Q9JIQ3	0.0389916	MI_IZ_vs_MI_remote
0.406747	13.9904	2.32626	0.0390543	0.101659	-4.31918	Capza1;Capza2	P47754;P47753	0.0390543	MI_IZ_vs_MI_remote
0.716078	18.9875	2.32511	0.0391352	0.101793	-4.32113	Apoa1	Q00623	0.0391352	MI_IZ_vs_MI_remote
-0.484558	12.5653	-2.32376	0.03923	0.101963	-4.3234	Rtn4ip1	Q924D0	0.03923	MI_IZ_vs_MI_remote
0.434977	11.1598	2.38557	0.0392817	0.10202	-4.09172	Col4a2;Col4a6	B1AVK5;P08122	0.0392817	MI_IZ_vs_MI_remote
0.347594	14.0009	2.32203	0.0393521	0.102127	-4.32632	Cp	Q61147	0.0393521	MI_IZ_vs_MI_remote
-0.256077	13.0251	-2.32096	0.0394275	0.102246	-4.32811	Lnpep	Q8C129	0.0394275	MI_IZ_vs_MI_remote
-0.408006	12.2281	-2.31858	0.0395961	0.102606	-4.33212	Ank3	G5E8K5	0.0395961	MI_IZ_vs_MI_remote
-0.721428	15.0595	-2.31695	0.0397117	0.102675	-4.33486	Ndufa1	O35683	0.0397117	MI_IZ_vs_MI_remote
0.352903	13.1967	2.31713	0.0396988	0.102675	-4.33455	Atp6v1b2	P62814	0.0396988	MI_IZ_vs_MI_remote
-0.698473	14.9458	-2.3176	0.0396651	0.102675	-4.33375	Ndufb9	Q9CQJ8	0.0396651	MI_IZ_vs_MI_remote
0.918807	10.8795	2.55614	0.0398236	0.102811	-3.91601	C9	P06683	0.0398236	MI_IZ_vs_MI_remote
0.723356	12.3769	2.37749	0.0398187	0.102811	-4.1046	Hook2	Q7TMK6	0.0398187	MI_IZ_vs_MI_remote
0.600915	12.7014	2.31373	0.0399412	0.102846	-4.34027	Gc	P21614	0.0399412	MI_IZ_vs_MI_remote
-0.305265	11.4372	-2.34184	0.0399109	0.102846	-4.24548	Ppp1r13l	Q5I1X5	0.0399109	MI_IZ_vs_MI_remote
0.479319	11.3202	2.31353	0.039956	0.102846	-4.34061	Ifitm2	Q99J93	0.039956	MI_IZ_vs_MI_remote
0.503373	10.7104	2.31466	0.0398748	0.102846	-4.3387	Rnps1	Q99M28	0.0398748	MI_IZ_vs_MI_remote
-0.464434	17.3432	-2.31056	0.0401686	0.103316	-4.34559	Dld	O08749	0.0401686	MI_IZ_vs_MI_remote
-0.637308	13.9922	-2.30756	0.040385	0.103796	-4.35063	Acot1;Acot2	Q9QYR9;O55137	0.040385	MI_IZ_vs_MI_remote
0.334532	14.4901	2.30674	0.0404445	0.10386	-4.35201	Hnrnpm	Q9D0E1	0.0404445	MI_IZ_vs_MI_remote
0.546555	10.9127	2.36782	0.0404701	0.10386	-4.22792	Dnajb1;Dnajb4	Q9D832;Q9QYJ3	0.0404701	MI_IZ_vs_MI_remote
0.368197	12.2029	2.30427	0.0406234	0.104156	-4.35615	Atp6v1e1	P50518	0.0406234	MI_IZ_vs_MI_remote
0.495534	12.3832	2.30397	0.0406457	0.104156	-4.35666	Rps15	P62843	0.0406457	MI_IZ_vs_MI_remote
0.434362	13.0793	2.30347	0.0406817	0.104172	-4.35749	Hnrnph1;Hnrnph2;Hnrnph3	D3Z3N4;P70333;O35737	0.0406817	MI_IZ_vs_MI_remote
-0.890432	16.1468	-2.30266	0.0407411	0.104177	-4.35886	Pln	P61014	0.0407411	MI_IZ_vs_MI_remote
-0.407	15.5849	-2.30262	0.0407438	0.104177	-4.35893	Slc25a12;Slc25a13	Q9QXX4;Q8BH59	0.0407438	MI_IZ_vs_MI_remote
0.466529	11.8012	2.30151	0.0408251	0.104307	-4.36079	Icam2	P35330	0.0408251	MI_IZ_vs_MI_remote
0.427948	11.081	2.53691	0.0409217	0.104477	-3.94302	Uap1	Q91YN5	0.0409217	MI_IZ_vs_MI_remote
0.356792	13.1831	2.29862	0.0410362	0.104692	-4.36563	Rbm14	Q8C2Q3	0.0410362	MI_IZ_vs_MI_remote
0.241602	13.6134	2.29721	0.0411399	0.104879	-4.36799	Rpl24	Q8BP67	0.0411399	MI_IZ_vs_MI_remote
-0.524345	18.3948	-2.29643	0.0411972	0.104948	-4.3693	Myh1;Myh13;Myh2;Myh4;Myh6;Myh7;Myh8	Q91Z83;B1AR69;G3UW82;Q02566;Q5SX39;P13542;Q5SX40	0.0411972	MI_IZ_vs_MI_remote
0.36561	11.994	2.29421	0.0413611	0.105288	-4.37302	Dazap1	Q9JII5	0.0413611	MI_IZ_vs_MI_remote
0.356866	12.2473	2.29152	0.0415605	0.105718	-4.37752	Eftud2	O08810	0.0415605	MI_IZ_vs_MI_remote
-0.578736	12.2393	-2.29087	0.0416089	0.105764	-4.37861	Cdh2;Cdh4	P15116;P39038	0.0416089	MI_IZ_vs_MI_remote
0.595532	12.5185	2.35049	0.0416647	0.105828	-4.19769	Snrpd1	P62315	0.0416647	MI_IZ_vs_MI_remote
-0.673984	12.1755	-2.28962	0.0417023	0.105846	-4.38071	Mtnd5	P03921	0.0417023	MI_IZ_vs_MI_remote
1.02543	20.2445	2.28753	0.0418587	0.106141	-4.38422	Hbb-bs	A8DUK4	0.0418587	MI_IZ_vs_MI_remote
0.649492	10.7507	2.28697	0.0419003	0.106141	-4.38515	Pla2g4a	P47713	0.0419003	MI_IZ_vs_MI_remote
-0.443311	12.8874	-2.34698	0.0419109	0.106141	-4.20329	Col4a3	Q9QZS0	0.0419109	MI_IZ_vs_MI_remote
-0.597426	13.0697	-2.28388	0.0421325	0.106625	-4.39032	Apobec2	Q9WV35	0.0421325	MI_IZ_vs_MI_remote
0.783423	12.1718	2.38533	0.0421718	0.106646	-4.22989	Serpina3a;Serpina3n	Q6P4P1;Q91WP6	0.0421718	MI_IZ_vs_MI_remote
1.01704	11.8456	2.51398	0.0422722	0.106744	-3.82162	Mcm7	Q61881	0.0422722	MI_IZ_vs_MI_remote
-0.651367	10.252	-2.342	0.0422624	0.106744	-4.161	Col26a1	Q91VF6	0.0422624	MI_IZ_vs_MI_remote
0.34027	12.6875	2.28074	0.0423698	0.106896	-4.39558	Dhx9	O70133	0.0423698	MI_IZ_vs_MI_remote
-0.472721	14.0934	-2.28042	0.0423939	0.106896	-4.39611	mt-Nd3	P03899	0.0423939	MI_IZ_vs_MI_remote
0.868667	10.3718	2.38094	0.0424707	0.107011	-4.08533	Vps4b	P46467	0.0424707	MI_IZ_vs_MI_remote
-0.286469	12.6423	-2.27753	0.0426129	0.107291	-4.40093	Chchd4	Q8VEA4	0.0426129	MI_IZ_vs_MI_remote
0.40141	12.6839	2.27672	0.042675	0.10737	-4.40229	Nsf	P46460	0.042675	MI_IZ_vs_MI_remote
0.288399	11.3104	2.27361	0.0429125	0.107502	-4.40748	Sec24c	G3X972	0.0429125	MI_IZ_vs_MI_remote
0.525165	10.9923	2.27359	0.0429139	0.107502	-4.40751	H2-D1;H2-L;H2-Q4	P01897;Q8HWB2;P14427	0.0429139	MI_IZ_vs_MI_remote
0.314541	13.7591	2.27394	0.0428875	0.107502	-4.40694	P4hb	P09103	0.0428875	MI_IZ_vs_MI_remote
0.434734	11.921	2.30146	0.0428126	0.107502	-4.31165	Stat1	P42225	0.0428126	MI_IZ_vs_MI_remote
-0.349285	13.689	-2.27506	0.0428014	0.107502	-4.40506	Clybl	Q8R4N0	0.0428014	MI_IZ_vs_MI_remote
-0.343119	14.7842	-2.27459	0.0428373	0.107502	-4.40584	Ak2	Q9WTP6	0.0428373	MI_IZ_vs_MI_remote
-0.697391	10.0471	-2.42819	0.0429648	0.107552	-4.09412	Retreg1	Q8VE91	0.0429648	MI_IZ_vs_MI_remote
-0.328573	11.6411	-2.27142	0.0430806	0.107624	-4.41114	Lrpap1	P55302	0.0430806	MI_IZ_vs_MI_remote
0.486609	12.0273	2.27164	0.0430635	0.107624	-4.41077	Hcfc1	Q61191	0.0430635	MI_IZ_vs_MI_remote
-0.476161	17.1341	-2.27134	0.0430867	0.107624	-4.41127	Etfdh	Q921G7	0.0430867	MI_IZ_vs_MI_remote
-0.296679	13.238	-2.27057	0.0431463	0.107695	-4.41257	Pabpc4	Q6PHQ9	0.0431463	MI_IZ_vs_MI_remote
-0.444264	17.3069	-2.2698	0.0432057	0.107765	-4.41385	Tufm	Q8BFR5	0.0432057	MI_IZ_vs_MI_remote
-0.305073	12.7727	-2.26753	0.0433807	0.108124	-4.41763	Mrps30	Q9D0G0	0.0433807	MI_IZ_vs_MI_remote
0.557646	17.3127	2.26367	0.0436804	0.108714	-4.42407	Hspb1	P14602	0.0436804	MI_IZ_vs_MI_remote
0.73986	11.507	2.32238	0.0436762	0.108714	-4.36904	Cnn2	Q08093	0.0436762	MI_IZ_vs_MI_remote
-0.317058	13.8661	-2.2613	0.0438654	0.109096	-4.42801	Atp1a2;Atp1a3	Q6PIC6;Q6PIE5	0.0438654	MI_IZ_vs_MI_remote
0.363764	11.7922	2.26003	0.0439651	0.109205	-4.43014	Puf60	Q3UEB3	0.0439651	MI_IZ_vs_MI_remote
0.488658	11.9175	2.28606	0.0439721	0.109205	-4.33679	Cfi	Q61129	0.0439721	MI_IZ_vs_MI_remote
0.275628	13.6406	2.25945	0.0440109	0.109223	-4.43111	Tardbp	Q921F2	0.0440109	MI_IZ_vs_MI_remote
-0.298407	12.8134	-2.25439	0.0444096	0.110133	-4.43953	Mtx1	P47802	0.0444096	MI_IZ_vs_MI_remote
0.316462	13.9668	2.25358	0.0444739	0.110135	-4.44088	Rpl28	P41105	0.0444739	MI_IZ_vs_MI_remote
-0.276461	15.5281	-2.25369	0.0444649	0.110135	-4.44069	Lamb2	Q61292	0.0444649	MI_IZ_vs_MI_remote
0.645345	11.5135	2.31034	0.0445664	0.110216	-4.38831	Saa1	P05366	0.0445664	MI_IZ_vs_MI_remote
-0.356234	14.1693	-2.25236	0.0445704	0.110216	-4.4429	Cpt1a;Cpt1b	P97742;Q924X2	0.0445704	MI_IZ_vs_MI_remote
-0.533696	12.6085	-2.24949	0.0447993	0.110703	-4.44769	Postn	Q62009	0.0447993	MI_IZ_vs_MI_remote
-0.500223	12.1658	-2.27255	0.045014	0.111154	-4.3588	Homer2	Q9QWW1	0.045014	MI_IZ_vs_MI_remote
-0.357941	13.1697	-2.24619	0.0450639	0.111198	-4.45318	Mtnd4	P03911	0.0450639	MI_IZ_vs_MI_remote
-0.332057	15.9917	-2.24509	0.045152	0.111257	-4.455	Phb2	O35129	0.045152	MI_IZ_vs_MI_remote
-0.316806	12.0171	-2.27086	0.0451456	0.111257	-4.36154	Oxa1l	Q8BGA9	0.0451456	MI_IZ_vs_MI_remote
0.313323	15.4846	2.24415	0.0452275	0.111364	-4.45656	Rpl10a	P53026	0.0452275	MI_IZ_vs_MI_remote
-0.360713	11.7048	-2.24332	0.0452942	0.111449	-4.45794	Gphn	Q8BUV3	0.0452942	MI_IZ_vs_MI_remote
-0.33238	11.6591	-2.26709	0.0454414	0.111732	-4.36767	Ptpmt1	Q66GT5	0.0454414	MI_IZ_vs_MI_remote
-0.30886	13.0889	-2.26646	0.0454913	0.111775	-4.3687	Chpt1	Q8C025	0.0454913	MI_IZ_vs_MI_remote
0.291548	12.6831	2.23942	0.0456102	0.111987	-4.46442	Srrt	Q99MR6	0.0456102	MI_IZ_vs_MI_remote
0.560565	11.3278	2.38724	0.0457298	0.112202	-4.03802	Gsdmd	Q9D8T2	0.0457298	MI_IZ_vs_MI_remote
0.66832	11.7506	2.23535	0.0459421	0.112643	-4.47118	Ighv1-15;Ighv1-18;Ighv1-22;Ighv1-23;Ighv1-26;Ighv1-31;Ighv1-34;Ighv1-81	A0A0A6YVW3;A0A075B5U4;A0A075B5V0;A0A075B5V1;A0A075B5V2;A0A075B5Y4;A0A0A6YXA5;A0A075B5U7	0.0459421	MI_IZ_vs_MI_remote
0.643237	12.0895	2.25602	0.0463208	0.113491	-4.38565	Tgm1	Q9JLF6	0.0463208	MI_IZ_vs_MI_remote
-0.388729	13.8522	-2.22907	0.0464588	0.113748	-4.4816	Sdr39u1	Q5M8N4	0.0464588	MI_IZ_vs_MI_remote
-0.411469	11.4429	-2.28371	0.0465997	0.113985	-4.25319	Dnah3;Dnah7a;Dnah7b;Dnah7c	L7N1Y0;E9Q0T8;A0A087WR13;Q8BW94	0.0465997	MI_IZ_vs_MI_remote
0.561813	10.9111	2.28269	0.0466792	0.113985	-4.43248	C1qb	P14106	0.0466792	MI_IZ_vs_MI_remote
0.724346	11.6946	2.22604	0.0467098	0.113985	-4.48662	Cemip2	Q5FWI3	0.0467098	MI_IZ_vs_MI_remote
0.411896	12.6093	2.22702	0.0466283	0.113985	-4.485	Rbms1;Rbms2	Q8VC70;Q91W59	0.0466283	MI_IZ_vs_MI_remote
0.525013	10.3457	2.44354	0.04672	0.113985	-4.07429	Ubap2	Q91VX2	0.04672	MI_IZ_vs_MI_remote
0.293959	12.1911	2.22179	0.0470643	0.114744	-4.49366	Rab35	Q6PHN9	0.0470643	MI_IZ_vs_MI_remote
0.414003	10.6083	2.24556	0.0471676	0.114915	-4.40264	Ccar2	Q8VDP4	0.0471676	MI_IZ_vs_MI_remote
-0.587499	11.7985	-2.21973	0.0472368	0.114922	-4.49707	Ryr1;Ryr2;Ryr3	A2AGL3;E9Q401;E9PZQ0	0.0472368	MI_IZ_vs_MI_remote
0.98867	11.5904	2.21998	0.0472155	0.114922	-4.49665	Mgp	P19788	0.0472155	MI_IZ_vs_MI_remote
-0.305853	13.8041	-2.21898	0.0472995	0.114994	-4.4983	Vps26a	P40336	0.0472995	MI_IZ_vs_MI_remote
0.983819	11.2112	2.3129	0.0473768	0.11502	-4.23365	Rab8b	P61028	0.0473768	MI_IZ_vs_MI_remote
-0.407614	11.4021	-2.24315	0.0473645	0.11502	-4.40654	Vamp5	Q9Z2P8	0.0473645	MI_IZ_vs_MI_remote
0.398458	11.8549	2.21674	0.047488	0.115209	-4.50201	Atic	Q9CWJ9	0.047488	MI_IZ_vs_MI_remote
0.25828	14.2053	2.21329	0.0477805	0.115612	-4.50772	Pcbp1	P60335	0.0477805	MI_IZ_vs_MI_remote
0.621213	9.80782	2.23866	0.0477339	0.115612	-4.41382	Txlna	Q6PAM1	0.0477339	MI_IZ_vs_MI_remote
0.418754	14.6118	2.21322	0.0477864	0.115612	-4.50784	Nrap	Q80XB4	0.0477864	MI_IZ_vs_MI_remote
-0.49247	10.7458	-2.30752	0.0477877	0.115612	-4.19769	Mrpl19	Q9D338	0.0477877	MI_IZ_vs_MI_remote
0.813619	11.7058	2.5268	0.0478372	0.115651	-3.84526	Rap2a;Rap2b;Rap2c	Q80ZJ1;P61226;Q8BU31	0.0478372	MI_IZ_vs_MI_remote
-0.514406	17.6588	-2.21131	0.0479486	0.115801	-4.51099	Ldhb	P16125	0.0479486	MI_IZ_vs_MI_remote
-0.308662	14.0317	-2.21075	0.0479962	0.115801	-4.51191	Dhrs4	Q99LB2	0.0479962	MI_IZ_vs_MI_remote
0.467991	13.4284	2.21071	0.0479994	0.115801	-4.51197	Ssr1	Q9CY50	0.0479994	MI_IZ_vs_MI_remote
0.33514	12.0617	2.20344	0.0486239	0.117226	-4.52399	Tcof1	O08784	0.0486239	MI_IZ_vs_MI_remote
-0.481918	12.4089	-2.20157	0.0487854	0.117533	-4.52707	Myh1;Myh13;Myh2;Myh6;Myh7;Myh8	Q91Z83;B1AR69;G3UW82;Q02566;P13542;Q5SX40	0.0487854	MI_IZ_vs_MI_remote
-0.322604	14.6306	-2.20035	0.0488912	0.117543	-4.52909	Ephx2	P34914	0.0488912	MI_IZ_vs_MI_remote
0.500289	12.945	2.20072	0.0488591	0.117543	-4.52848	Nucks1	Q80XU3	0.0488591	MI_IZ_vs_MI_remote
-0.52263	12.0937	-2.25533	0.0488656	0.117543	-4.29785	Uqcc2	Q9CQY6	0.0488656	MI_IZ_vs_MI_remote
-0.405964	11.8967	-2.19811	0.0490861	0.117929	-4.53278	Scn5a	Q9JJV9	0.0490861	MI_IZ_vs_MI_remote
-0.312147	12.2686	-2.19736	0.0491509	0.118003	-4.53401	Akap1	O08715	0.0491509	MI_IZ_vs_MI_remote
0.428572	12.0819	2.19545	0.0493176	0.118321	-4.53715	Gfpt1;Gfpt2	P47856;Q9Z2Z9	0.0493176	MI_IZ_vs_MI_remote
0.376093	11.8316	2.2478	0.0494844	0.118639	-4.30967	Dhdh	Q9DBB8	0.0494844	MI_IZ_vs_MI_remote
0.421818	11.9049	2.19069	0.0497358	0.119077	-4.54499	Chd4	Q6PDQ2	0.0497358	MI_IZ_vs_MI_remote
0.620067	11.7523	2.24503	0.0497136	0.119077	-4.42347	Blvrb	Q923D2	0.0497136	MI_IZ_vs_MI_remote
0.370399	11.5492	2.21324	0.0498764	0.119289	-4.45489	Ythdf1;Ythdf2;Ythdf3	Q91YT7;Q8BYK6;P59326	0.0498764	MI_IZ_vs_MI_remote
-0.320188	11.8992	-2.18891	0.0498931	0.119289	-4.54793	Pfkp	Q9WUA3	0.0498931	MI_IZ_vs_MI_remote
0.36329	13.3597	2.18406	0.0503242	0.120236	-4.55591	Tra2b	P62996	0.0503242	MI_IZ_vs_MI_remote
0.255921	18.965	2.18251	0.0504625	0.120406	-4.55846	Hspa1a;Hspa1b;Hspa1l;Hspa2;Hspa8	Q61696;P63017;P17156;P17879;P16627	0.0504625	MI_IZ_vs_MI_remote
0.329891	12.0919	2.18248	0.0504648	0.120406	-4.5585	Pspc1	Q8R326	0.0504648	MI_IZ_vs_MI_remote
-0.322003	13.075	-2.18057	0.0506363	0.120732	-4.56165	Hibch	Q8QZS1	0.0506363	MI_IZ_vs_MI_remote
-0.455265	14.1148	-2.1787	0.0508042	0.121013	-4.56472	Myh1;Myh15;Myh2;Myh3;Myh4;Myh6;Myh8	G3UW82;Q02566;E9Q264;P13541;Q5SX39;P13542;Q5SX40	0.0508042	MI_IZ_vs_MI_remote
-0.49442	16.9121	-2.17782	0.0508837	0.121013	-4.56617	Ldha;Ldhc	P00342;P06151	0.0508837	MI_IZ_vs_MI_remote
0.539267	14.935	2.17748	0.0509139	0.121013	-4.56672	Apoa4	P06728	0.0509139	MI_IZ_vs_MI_remote
-0.607086	10.8296	-2.202	0.050853	0.121013	-4.473	Mrpl11	Q9CQF0	0.050853	MI_IZ_vs_MI_remote
-0.539899	11.1276	-2.17693	0.050964	0.121013	-4.56763	Tomm6	Q9CQN3	0.050964	MI_IZ_vs_MI_remote
-0.292602	14.0068	-2.1771	0.0509483	0.121013	-4.56734	Ehd3;Ehd4	Q9QXY6;Q9EQP2	0.0509483	MI_IZ_vs_MI_remote
-0.405618	11.9705	-2.17156	0.0514502	0.122084	-4.57643	Gstm5	P48774	0.0514502	MI_IZ_vs_MI_remote
-0.282624	12.5092	-2.17116	0.0514871	0.122088	-4.5771	Pacsin3	Q99JB8	0.0514871	MI_IZ_vs_MI_remote
-0.3232	11.8205	-2.22229	0.0516381	0.122362	-4.40058	Abcd3	P55096	0.0516381	MI_IZ_vs_MI_remote
-0.542045	11.9152	-2.16809	0.0517672	0.122584	-4.58212	Plod1	Q9R0E2	0.0517672	MI_IZ_vs_MI_remote
-0.389013	9.61252	-2.30452	0.0518772	0.122761	-4.23303	Mindy2	Q6PDI6	0.0518772	MI_IZ_vs_MI_remote
0.307729	15.2899	2.1658	0.0519773	0.122833	-4.58588	S100a10	P08207	0.0519773	MI_IZ_vs_MI_remote
-0.412434	12.1672	-2.21835	0.0519789	0.122833	-4.35579	Ndufaf1	Q9CWX2	0.0519789	MI_IZ_vs_MI_remote
0.514877	12.6726	2.3664	0.0521513	0.123157	-4.18273	Sh3bp1	P55194	0.0521513	MI_IZ_vs_MI_remote
0.279231	15.1621	2.16278	0.052256	0.123236	-4.59083	Rps14	P62264	0.052256	MI_IZ_vs_MI_remote
0.435532	13.8332	2.16308	0.0522285	0.123236	-4.59034	Rpl19	P84099	0.0522285	MI_IZ_vs_MI_remote
0.325596	13.4084	2.1613	0.0523931	0.123391	-4.59325	Rps28	P62858	0.0523931	MI_IZ_vs_MI_remote
0.802433	11.4663	2.29812	0.052386	0.123391	-4.16811	Pabpc1;Pabpc2	Q62029;P29341	0.052386	MI_IZ_vs_MI_remote
-0.253959	13.7019	-2.15801	0.0526988	0.124027	-4.59864	Rab18	P35293	0.0526988	MI_IZ_vs_MI_remote
0.466036	11.0705	2.20927	0.0527725	0.124116	-4.47987	Gmppb	Q8BTZ7	0.0527725	MI_IZ_vs_MI_remote
0.308203	13.0025	2.15441	0.0530353	0.124567	-4.60453	Pabpc1;Pabpc2;Pabpc4;Pabpc6	Q6PHQ9;Q62029;Q9D4E6;P29341	0.0530353	MI_IZ_vs_MI_remote
-0.412872	12.5661	-2.15439	0.0530365	0.124567	-4.60455	Dnajc19	Q9CQV7	0.0530365	MI_IZ_vs_MI_remote
-0.223108	12.4252	-2.15175	0.0532852	0.125067	-4.60888	Trip10	Q8CJ53	0.0532852	MI_IZ_vs_MI_remote
-0.241499	13.2147	-2.15014	0.0534371	0.125338	-4.61151	Prkar1a	Q9DBC7	0.0534371	MI_IZ_vs_MI_remote
0.357662	13.1026	2.14557	0.0538695	0.126259	-4.61896	Rap1a	P62835	0.0538695	MI_IZ_vs_MI_remote
0.307101	13.7159	2.14523	0.0539026	0.126259	-4.61953	Copa	Q8CIE6	0.0539026	MI_IZ_vs_MI_remote
0.270568	12.4011	2.14187	0.0542231	0.126849	-4.62501	Csde1	Q91W50	0.0542231	MI_IZ_vs_MI_remote
-0.379722	11.2383	-2.14182	0.0542279	0.126849	-4.62509	Parva	Q9EPC1	0.0542279	MI_IZ_vs_MI_remote
0.287232	14.9335	2.1401	0.0543925	0.126977	-4.62789	Gnai1;Gnai2;Gnai3;Gnal;Gnao1;Gnas;Gnat1;Gnat2;Gnat3	P08752;P18872;Q3V3I2;Q8CGK7;Q9DC51;B2RSH2;Q6R0H7;P20612;P50149	0.0543925	MI_IZ_vs_MI_remote
0.426461	13.2729	2.14069	0.0543358	0.126977	-4.62693	Rbm39	Q8VH51	0.0543358	MI_IZ_vs_MI_remote
-0.522439	16.2661	-2.14024	0.0543786	0.126977	-4.62766	Acot13	Q9CQR4	0.0543786	MI_IZ_vs_MI_remote
-0.383187	15.1554	-2.1392	0.0544786	0.127092	-4.62936	Cpt2	P52825	0.0544786	MI_IZ_vs_MI_remote
-0.23671	15.8577	-2.1375	0.0546429	0.127389	-4.63214	Nid1	P10493	0.0546429	MI_IZ_vs_MI_remote
0.326315	12.1745	2.13712	0.0546794	0.127389	-4.63275	Sf3a3	Q9D554	0.0546794	MI_IZ_vs_MI_remote
-0.3129	11.8466	-2.13427	0.0549544	0.127943	-4.63739	Rbm24;Rbm38	Q62176;D3Z4I3	0.0549544	MI_IZ_vs_MI_remote
0.477481	11.159	2.18125	0.0552959	0.128652	-4.52387	Tacc1	Q6Y685	0.0552959	MI_IZ_vs_MI_remote
-0.392186	12.1573	-2.128	0.0555654	0.129192	-4.64759	Rhot1	Q8BG51	0.0555654	MI_IZ_vs_MI_remote
0.365144	11.3627	2.1474	0.0558645	0.129714	-4.63007	Nap1l1	P28656	0.0558645	MI_IZ_vs_MI_remote
-0.316587	11.9566	-2.14778	0.0558278	0.129714	-4.55991	Timm29	Q8BGX2	0.0558278	MI_IZ_vs_MI_remote
0.505661	12.3848	2.12344	0.0560144	0.1298	-4.65502	Epb41	P48193	0.0560144	MI_IZ_vs_MI_remote
-0.390321	14.3771	-2.12368	0.0559907	0.1298	-4.65463	Dbt	P53395	0.0559907	MI_IZ_vs_MI_remote
-0.576085	10.5006	-2.17371	0.0559946	0.1298	-4.42537	Ilvbl	Q8BU33	0.0559946	MI_IZ_vs_MI_remote
0.338491	12.5277	2.12299	0.0560589	0.129817	-4.65575	Eif3h	Q91WK2	0.0560589	MI_IZ_vs_MI_remote
0.539167	11.4642	2.17146	0.0562051	0.130068	-4.42887	G6pd2;G6pdx	Q00612;P97324	0.0562051	MI_IZ_vs_MI_remote
0.373631	11.5898	2.12011	0.0563435	0.130301	-4.66042	Ddx6	P54823	0.0563435	MI_IZ_vs_MI_remote
0.249258	16.7427	2.1196	0.0563941	0.130331	-4.66125	Ahnak	E9Q616	0.0563941	MI_IZ_vs_MI_remote
0.276927	12.2006	2.11503	0.0568494	0.131219	-4.66866	Lsm6	P62313	0.0568494	MI_IZ_vs_MI_remote
0.40422	11.7757	2.13717	0.056854	0.131219	-4.57683	Snrnp40	Q6PE01	0.056854	MI_IZ_vs_MI_remote
-0.751137	11.6283	-2.13489	0.0570773	0.131647	-4.58046	Sparc	P07214	0.0570773	MI_IZ_vs_MI_remote
0.400543	11.4151	2.11196	0.0571575	0.131744	-4.67364	Snrpb2	Q9CQI7	0.0571575	MI_IZ_vs_MI_remote
0.3148	13.5353	2.10813	0.0575438	0.132458	-4.67985	Eif4a1;Eif4a2	P10630;P60843	0.0575438	MI_IZ_vs_MI_remote
-0.313419	12.4176	-2.10827	0.05753	0.132458	-4.67963	Eml2	Q7TNG5	0.05753	MI_IZ_vs_MI_remote
-0.759426	13.2692	-2.10683	0.0576764	0.132675	-4.68197	Cav3	P51637	0.0576764	MI_IZ_vs_MI_remote
0.443728	12.2651	2.23433	0.0577416	0.132737	-4.33591	Isy1	Q69ZQ2	0.0577416	MI_IZ_vs_MI_remote
0.35908	13.0991	2.10524	0.0578378	0.13287	-4.68454	Prmt1	Q9JIF0	0.0578378	MI_IZ_vs_MI_remote
-0.634393	10.5686	-2.29249	0.0579663	0.133076	-4.10181	Commd3	Q63829	0.0579663	MI_IZ_vs_MI_remote
-0.55934	10.672	-2.2271	0.0583814	0.133941	-4.34646	Mmgt1	Q8K273	0.0583814	MI_IZ_vs_MI_remote
0.512835	11.8003	2.09886	0.0584899	0.134101	-4.69486	Prpf6	Q91YR7	0.0584899	MI_IZ_vs_MI_remote
-0.466491	12.1776	-2.0979	0.0585884	0.134149	-4.69641	Mrpl58	Q8R035	0.0585884	MI_IZ_vs_MI_remote
-0.448357	16.0846	-2.09825	0.0585527	0.134149	-4.69585	Gatd3	Q9D172	0.0585527	MI_IZ_vs_MI_remote
-0.258832	13.7594	-2.09627	0.0587569	0.134446	-4.69905	Pdcd10	Q8VE70	0.0587569	MI_IZ_vs_MI_remote
0.385531	12.8005	2.09555	0.0588307	0.134526	-4.70021	Tia1;Tial1	P70318;P52912	0.0588307	MI_IZ_vs_MI_remote
-0.494485	18.5061	-2.09164	0.0592362	0.134944	-4.70653	Acadm	P45952	0.0592362	MI_IZ_vs_MI_remote
0.258722	12.6683	2.09254	0.0591426	0.134944	-4.70507	Sumo2;Sumo3	P61957;Q9Z172	0.0591426	MI_IZ_vs_MI_remote
0.310025	14.6866	2.09118	0.0592838	0.134944	-4.70726	Gnb1;Gnb2	P62874;P62880	0.0592838	MI_IZ_vs_MI_remote
-0.423767	11.8263	-2.11449	0.0591088	0.134944	-4.61288	Yars2	Q8BYL4	0.0591088	MI_IZ_vs_MI_remote
0.36948	14.2132	2.09329	0.0590649	0.134944	-4.70386	Tmed9	Q99KF1	0.0590649	MI_IZ_vs_MI_remote
0.309381	14.4875	2.09116	0.0592864	0.134944	-4.7073	Rrbp1	Q99PL5	0.0592864	MI_IZ_vs_MI_remote
-0.746151	10.4901	-2.14016	0.0592077	0.134944	-4.52879	Clip1;Clip2	Q9Z0H8;Q922J3	0.0592077	MI_IZ_vs_MI_remote
0.218864	13.4763	2.09026	0.0593805	0.135069	-4.70876	Eif3l	Q8QZY1	0.0593805	MI_IZ_vs_MI_remote
0.884682	10.7798	2.16875	0.0596967	0.135699	-4.56326	Ighv1-20;Ighv1-22;Ighv1-26;Ighv1-31;Ighv1-34;Ighv1-42;Ighv1-43	A0A075B5U6;P06330;A0A075B5V0;A0A075B5V1;A0A075B5V2;A0A075B5U7;A0A075B5V6;A0A075B5V7	0.0596967	MI_IZ_vs_MI_remote
-0.31461	11.4732	-2.10446	0.0601323	0.136574	-4.62876	Spg7	Q3ULF4	0.0601323	MI_IZ_vs_MI_remote
-0.322598	12.3647	-2.08282	0.0601604	0.136574	-4.72075	Chchd6	Q91VN4	0.0601604	MI_IZ_vs_MI_remote
0.286396	11.9917	2.08179	0.0602692	0.136731	-4.72241	Gcn1	E9PVA8	0.0602692	MI_IZ_vs_MI_remote
0.673507	12.4912	2.07815	0.0606554	0.137427	-4.72828	Ighg3	P03987;A0A1Y7VJN6	0.0606554	MI_IZ_vs_MI_remote
-0.218279	12.4535	-2.07828	0.0606417	0.137427	-4.72807	Tars2	Q3UQ84	0.0606417	MI_IZ_vs_MI_remote
-0.237379	13.7825	-2.07761	0.0607125	0.137467	-4.72914	Fermt2	Q8CIB5	0.0607125	MI_IZ_vs_MI_remote
0.305309	11.3096	2.0765	0.0608309	0.137645	-4.73093	Srsf4	Q8VE97	0.0608309	MI_IZ_vs_MI_remote
0.364408	12.2106	2.07568	0.0609184	0.137753	-4.73225	Alyref	O08583	0.0609184	MI_IZ_vs_MI_remote
-0.402199	11.5494	-2.07525	0.0609639	0.137766	-4.73294	Pcolce	Q61398	0.0609639	MI_IZ_vs_MI_remote
0.635044	12.8366	2.07368	0.0611328	0.138057	-4.73548	Cotl1	Q9CQI6	0.0611328	MI_IZ_vs_MI_remote
0.518271	11.4214	2.09268	0.061356	0.138468	-4.64738	Fbl	P35550	0.061356	MI_IZ_vs_MI_remote
0.558382	11.3253	2.11832	0.0613947	0.138468	-4.56262	Cd63	P41731	0.0613947	MI_IZ_vs_MI_remote
-0.452792	14.0329	-2.06974	0.0615559	0.138741	-4.7418	Myh13	B1AR69	0.0615559	MI_IZ_vs_MI_remote
-0.416004	11.8687	-2.11604	0.0616274	0.138812	-4.51457	Cmbl	Q8R1G2	0.0616274	MI_IZ_vs_MI_remote
0.262509	13.4349	2.06866	0.0616724	0.138823	-4.74354	Serbp1	Q9CY58	0.0616724	MI_IZ_vs_MI_remote
-0.232812	13.0214	-2.06768	0.0617787	0.138972	-4.74512	Htra2	Q9JIY5	0.0617787	MI_IZ_vs_MI_remote
-0.616428	16.9266	-2.08765	0.0618854	0.139032	-4.65532	Ndufb11	O09111	0.0618854	MI_IZ_vs_MI_remote
0.306984	14.0937	2.06669	0.0618856	0.139032	-4.7467	Fus;Taf15	P56959;Q8BQ46	0.0618856	MI_IZ_vs_MI_remote
0.432703	12.0277	2.06603	0.0619572	0.139102	-4.74776	Tor1aip1	Q921T2	0.0619572	MI_IZ_vs_MI_remote
-0.30695	11.0863	-2.08565	0.0620979	0.139328	-4.65848	Synj2bp	Q9D6K5	0.0620979	MI_IZ_vs_MI_remote
0.489116	13.4817	2.06385	0.0621939	0.139333	-4.75126	M6pr	P24668	0.0621939	MI_IZ_vs_MI_remote
-0.509081	10.801	-2.14325	0.0621815	0.139333	-4.44626	Fam98a	Q3TJZ6	0.0621815	MI_IZ_vs_MI_remote
1.37523	11.204	2.24309	0.0622211	0.139333	-4.19358	Atp2a3	Q64518	0.0622211	MI_IZ_vs_MI_remote
0.356394	12.5717	2.14222	0.0622839	0.139384	-4.60355	Trim47	Q8C0E3	0.0622839	MI_IZ_vs_MI_remote
0.467856	11.6969	2.08298	0.0623812	0.139421	-4.66269	Pxdn	Q3UQ28	0.0623812	MI_IZ_vs_MI_remote
0.399762	12.1851	2.06243	0.0623485	0.139421	-4.75354	Smc1a	Q9CU62	0.0623485	MI_IZ_vs_MI_remote
0.356109	11.5267	2.1071	0.0625478	0.139703	-4.6394	Arih1	Q9Z1K5	0.0625478	MI_IZ_vs_MI_remote
-0.510952	15.9846	-2.06001	0.0626133	0.13976	-4.75742	Sod2	P09671	0.0626133	MI_IZ_vs_MI_remote
-0.345253	14.5884	-2.05814	0.0628188	0.140128	-4.76042	Col4a1	P02463	0.0628188	MI_IZ_vs_MI_remote
-0.489472	11.3089	-2.10267	0.0630086	0.140461	-4.58678	Dcaf8	Q8N7N5	0.0630086	MI_IZ_vs_MI_remote
0.303862	13.6272	2.05431	0.0632413	0.140854	-4.76656	Psmb1	O09061	0.0632413	MI_IZ_vs_MI_remote
-0.457266	14.854	-2.05384	0.0632932	0.140854	-4.76732	Pfkl;Pfkm	P12382;P47857	0.0632932	MI_IZ_vs_MI_remote
0.357598	13.6226	2.05371	0.0633069	0.140854	-4.76751	Dnajb11	Q99KV1	0.0633069	MI_IZ_vs_MI_remote
0.257855	13.6774	2.05166	0.0635349	0.141213	-4.77081	Eif4b	Q8BGD9	0.0635349	MI_IZ_vs_MI_remote
-0.864988	10.8877	-2.1715	0.0635497	0.141213	-4.42751	Filip1	Q9CS72	0.0635497	MI_IZ_vs_MI_remote
-0.280432	12.8317	-2.05058	0.0636547	0.141355	-4.77253	Gsk3b	Q9WV60	0.0636547	MI_IZ_vs_MI_remote
0.300365	12.9228	2.04901	0.0638301	0.141563	-4.77505	Rpl10;Rpl10l	Q6ZWV3;P86048	0.0638301	MI_IZ_vs_MI_remote
0.25364	13.2261	2.04937	0.0637899	0.141563	-4.77447	Psmb2	Q9R1P3	0.0637899	MI_IZ_vs_MI_remote
0.56039	12.5802	2.12543	0.0639777	0.141751	-4.62898	Saa2	P05367	0.0639777	MI_IZ_vs_MI_remote
-0.247674	12.7505	-2.04752	0.0639967	0.141751	-4.77743	Ppp1cb	P62141	0.0639967	MI_IZ_vs_MI_remote
-0.606403	11.105	-2.0928	0.0640476	0.141773	-4.60199	Myh1	Q5SX40	0.0640476	MI_IZ_vs_MI_remote
0.225019	19.1013	2.04653	0.0641064	0.141812	-4.779	Eef1a1;Eef1a2	P10126;P62631	0.0641064	MI_IZ_vs_MI_remote
-0.624641	10.6993	-2.12219	0.0643093	0.14217	-4.3113	Klhl31	Q8BWA5	0.0643093	MI_IZ_vs_MI_remote
-0.241602	15.5817	-2.04328	0.0644714	0.142438	-4.7842	Ehd4	Q9EQP2	0.0644714	MI_IZ_vs_MI_remote
0.402818	12.5152	2.04226	0.0645864	0.142601	-4.78583	Sec11a	Q9R0P6	0.0645864	MI_IZ_vs_MI_remote
0.387596	11.9191	2.04032	0.0648055	0.142993	-4.78892	Pigs	Q6PD26	0.0648055	MI_IZ_vs_MI_remote
0.50162	11.0676	2.08361	0.06503	0.143397	-4.67572	Cope	O89079	0.06503	MI_IZ_vs_MI_remote
-0.288759	15.927	-2.03631	0.0652607	0.143632	-4.79532	Phb1	P67778	0.0652607	MI_IZ_vs_MI_remote
-0.306533	11.9645	-2.03653	0.0652359	0.143632	-4.79498	Mrpl53	Q9D1H8	0.0652359	MI_IZ_vs_MI_remote
-0.379563	12.8549	-2.03668	0.0652188	0.143632	-4.79474	Ppie;Ppif	Q9QZH3;Q99KR7	0.0652188	MI_IZ_vs_MI_remote
-0.318701	12.7966	-2.03553	0.0653503	0.143737	-4.79658	Anp32a;Anp32c	Q64G17;O35381	0.0653503	MI_IZ_vs_MI_remote
0.400355	11.3115	2.05527	0.0654014	0.143759	-4.70626	Crk	Q64010	0.0654014	MI_IZ_vs_MI_remote
0.5544	13.7091	2.03368	0.0655611	0.143927	-4.79952	Ttr	P07309	0.0655611	MI_IZ_vs_MI_remote
-0.338748	12.0952	-2.03379	0.0655489	0.143927	-4.79935	Isoc1	Q91V64	0.0655489	MI_IZ_vs_MI_remote
-0.480553	11.2742	-2.15056	0.0656128	0.143949	-4.45794	Get4	Q9D1H7	0.0656128	MI_IZ_vs_MI_remote
0.295727	12.4547	2.03167	0.0657914	0.144183	-4.80272	Hras;Kras;Nras	P08556;P32883;Q61411	0.0657914	MI_IZ_vs_MI_remote
0.351325	10.9893	2.03157	0.0658028	0.144183	-4.80288	Rprd1b	Q9CSU0	0.0658028	MI_IZ_vs_MI_remote
0.562928	10.8937	2.10414	0.0661894	0.144755	-4.50473	Sin3a	Q60520	0.0661894	MI_IZ_vs_MI_remote
0.285853	14.0513	2.02855	0.0661505	0.144755	-4.8077	Rpn1	Q91YQ5	0.0661505	MI_IZ_vs_MI_remote
-0.348239	12.5654	-2.04885	0.0661207	0.144755	-4.71632	Naalad2	Q9CZR2	0.0661207	MI_IZ_vs_MI_remote
0.470508	12.6767	2.0277	0.0662492	0.144795	-4.80906	Ddx39b	Q9Z1N5	0.0662492	MI_IZ_vs_MI_remote
0.257912	12.7407	2.02457	0.0666109	0.145493	-4.81403	Sugt1	Q9CX34	0.0666109	MI_IZ_vs_MI_remote
0.349496	12.8696	2.04322	0.0667574	0.14563	-4.72513	Fus	P56959	0.0667574	MI_IZ_vs_MI_remote
0.346676	12.3352	2.0234	0.0667466	0.14563	-4.81589	Lima1	Q9ERG0	0.0667466	MI_IZ_vs_MI_remote
-0.530698	16.3448	-2.02286	0.0668104	0.145653	-4.81676	Ndufb10	Q9DCS9	0.0668104	MI_IZ_vs_MI_remote
-0.506206	18.506	-2.01899	0.0672613	0.146544	-4.8229	Mdh2	P08249	0.0672613	MI_IZ_vs_MI_remote
0.497298	13.8905	2.01753	0.0674329	0.146826	-4.82522	Fabp5	Q05816	0.0674329	MI_IZ_vs_MI_remote
0.53756	11.303	2.13194	0.0675019	0.146883	-4.40865	Ranbp1	P34022	0.0675019	MI_IZ_vs_MI_remote
-0.591217	10.3645	-2.1301	0.0676913	0.147203	-4.29665	Lsmem1	Q3UQS2	0.0676913	MI_IZ_vs_MI_remote
-0.698699	10.6495	-2.08861	0.0678498	0.147455	-4.52786	Mfn2	Q80U63	0.0678498	MI_IZ_vs_MI_remote
-0.260307	14.7382	-2.0136	0.0678964	0.147464	-4.83147	Col15a1	O35206	0.0678964	MI_IZ_vs_MI_remote
0.666357	8.25845	2.0852	0.0682198	0.148	-4.63014	Smarcc1	P97496	0.0682198	MI_IZ_vs_MI_remote
-0.273739	13.877	-2.01079	0.068229	0.148	-4.83592	Rtn3	Q9ES97	0.068229	MI_IZ_vs_MI_remote
0.391124	10.2948	2.12409	0.068315	0.148094	-4.41993	Spata5	Q3UMC0	0.068315	MI_IZ_vs_MI_remote
0.359685	11.7452	2.029	0.0683913	0.148167	-4.74734	Cmpk1	Q9DBP5	0.0683913	MI_IZ_vs_MI_remote
-0.371079	12.5531	-2.00906	0.0684344	0.148167	-4.83866	Septin7;Septin9	Q80UG5;O55131	0.0684344	MI_IZ_vs_MI_remote
0.459047	11.3414	2.00758	0.0686114	0.148458	-4.84102	Atp6v1h	Q8BVE3	0.0686114	MI_IZ_vs_MI_remote
-0.31144	12.6844	-2.00217	0.0692596	0.149767	-4.84958	Hccs	P53702	0.0692596	MI_IZ_vs_MI_remote
0.282784	11.5587	2.0017	0.0693162	0.149796	-4.85032	Gm7324;Rbmxl1	Q91VM5;A0A2I3BRL8	0.0693162	MI_IZ_vs_MI_remote
-0.418568	19.5264	-2.00054	0.0694555	0.150003	-4.85215	Col1a2	Q01149	0.0694555	MI_IZ_vs_MI_remote
-0.645125	12.6019	-2.0182	0.0696563	0.150343	-4.76415	Ace	P09470	0.0696563	MI_IZ_vs_MI_remote
0.296258	13.2933	1.9982	0.0697392	0.150428	-4.85586	Idh1	O88844	0.0697392	MI_IZ_vs_MI_remote
0.382343	12.519	1.99227	0.0704602	0.151889	-4.86522	Wasf2	Q8BH43	0.0704602	MI_IZ_vs_MI_remote
0.432298	12.3156	2.0642	0.0705409	0.151968	-4.66155	Sptb;Sptbn1;Sptbn2	P15508;Q68FG2;Q62261	0.0705409	MI_IZ_vs_MI_remote
-0.410268	13.1602	-1.98962	0.0707855	0.1524	-4.86941	Syne2	Q6ZWQ0	0.0707855	MI_IZ_vs_MI_remote
0.532444	12.2493	2.09911	0.0709654	0.152693	-4.6293	Myh10;Myh14;Myh9	Q61879;Q6URW6;Q8VDD5	0.0709654	MI_IZ_vs_MI_remote
-0.334995	13.4768	-1.9867	0.0711451	0.152984	-4.87402	Dglucy	Q8BH86	0.0711451	MI_IZ_vs_MI_remote
0.376108	12.3	1.98629	0.0711959	0.152998	-4.87466	Atp6v0d1	P51863	0.0711959	MI_IZ_vs_MI_remote
0.717006	12.7957	1.98492	0.0713651	0.153267	-4.87682	Cfh;Cfhr2	A0A668KLU9;P06909	0.0713651	MI_IZ_vs_MI_remote
-0.251082	13.2798	-1.9838	0.0715036	0.153469	-4.87858	Ptpn11	P35235	0.0715036	MI_IZ_vs_MI_remote
-0.30579	12.487	-2.00197	0.0716011	0.153566	-4.78937	Pam16	Q9CQV1	0.0716011	MI_IZ_vs_MI_remote
0.344723	13.3117	1.98272	0.0716373	0.153566	-4.88028	Ipo7	Q9EPL8	0.0716373	MI_IZ_vs_MI_remote
0.324093	14.0656	1.98164	0.071772	0.153569	-4.88199	Rpl36	P47964	0.071772	MI_IZ_vs_MI_remote
0.524362	12.0117	1.98224	0.0716973	0.153569	-4.88104	Stim1	P70302	0.0716973	MI_IZ_vs_MI_remote
-0.505771	18.6516	-1.98198	0.0717295	0.153569	-4.88145	Cs;Csl	Q80X68;Q9CZU6	0.0717295	MI_IZ_vs_MI_remote
-0.350242	12.9686	-1.99835	0.0720415	0.15405	-4.79498	Mrps28	Q9CY16	0.0720415	MI_IZ_vs_MI_remote
-0.277183	12.7782	-1.97808	0.0722166	0.154139	-4.8876	Cacna2d1	O08532	0.0722166	MI_IZ_vs_MI_remote
0.261971	13.7787	1.97866	0.0721432	0.154139	-4.88667	Rab7a	P51150	0.0721432	MI_IZ_vs_MI_remote
-0.456001	12.6372	-1.9781	0.0722137	0.154139	-4.88756	Coq3	Q8BMS4	0.0722137	MI_IZ_vs_MI_remote
-0.300086	13.1581	-1.97489	0.072617	0.154898	-4.89262	Grpel1	Q99LP6	0.072617	MI_IZ_vs_MI_remote
0.733822	10.9329	2.01393	0.0729585	0.155531	-4.78256	Erp29	P57759	0.0729585	MI_IZ_vs_MI_remote
0.199168	13.4024	1.97057	0.0731616	0.155868	-4.8994	Dars1	Q922B2	0.0731616	MI_IZ_vs_MI_remote
0.290749	12.9182	1.96949	0.0732993	0.155996	-4.9011	Ybx1	P62960	0.0732993	MI_IZ_vs_MI_remote
0.681432	12.2963	2.01099	0.0733117	0.155996	-4.67488	Fbll1	Q80WS3	0.0733117	MI_IZ_vs_MI_remote
0.570133	13.5844	2.12825	0.0733822	0.15605	-4.32558	Eml5	Q8BQM8	0.0733822	MI_IZ_vs_MI_remote
0.223164	14.7259	1.96521	0.0738439	0.156935	-4.90781	Pabpc1;Pabpc1l;Pabpc2;Pabpc4;Pabpc6	Q6PHQ9;Q62029;A2A5N3;Q9D4E6;P29341	0.0738439	MI_IZ_vs_MI_remote
0.349227	14.8419	1.96354	0.0740573	0.157059	-4.91043	Ywhaz	P63101	0.0740573	MI_IZ_vs_MI_remote
0.231972	11.7198	1.96334	0.0740834	0.157059	-4.91075	Arhgap1	Q5FWK3	0.0740834	MI_IZ_vs_MI_remote
0.336052	12.3905	1.96339	0.0740767	0.157059	-4.91067	Cnn2;Cnn3	Q9DAW9;Q08093	0.0740767	MI_IZ_vs_MI_remote
0.572979	10.8944	1.98226	0.0740296	0.157059	-4.81985	Sart1	Q9Z315	0.0740296	MI_IZ_vs_MI_remote
-0.359695	12.3178	-1.96239	0.0742044	0.157219	-4.91223	Steap3	Q8CI59	0.0742044	MI_IZ_vs_MI_remote
-0.193397	12.4187	-1.95761	0.0748207	0.158428	-4.91972	Appl1	Q8K3H0	0.0748207	MI_IZ_vs_MI_remote
0.294714	13.6635	1.95672	0.0749362	0.158575	-4.92112	Ddost	O54734	0.0749362	MI_IZ_vs_MI_remote
-0.399373	11.1747	-1.97379	0.0750971	0.158819	-4.83292	Timm8a1;Timm8a2	Q9WVA2;Q4FZG7	0.0750971	MI_IZ_vs_MI_remote
-0.35405	15.1277	-1.95413	0.0752714	0.158993	-4.92516	Hint2	Q9D0S9	0.0752714	MI_IZ_vs_MI_remote
-0.463561	17.8089	-1.95433	0.0752463	0.158993	-4.92486	Etfb	Q9DCW4	0.0752463	MI_IZ_vs_MI_remote
-0.501018	13.5557	-1.95298	0.0754219	0.159203	-4.92697	Crmp1;Dpysl2;Dpysl3	P97427;O08553;Q62188	0.0754219	MI_IZ_vs_MI_remote
-0.424062	11.9012	-1.95266	0.0754626	0.159203	-4.92746	Ecpas	Q6PDI5	0.0754626	MI_IZ_vs_MI_remote
-0.347124	17.0408	-1.95189	0.0755629	0.159317	-4.92866	Ldha	P06151	0.0755629	MI_IZ_vs_MI_remote
-0.534883	10.2995	-2.0563	0.0757461	0.159606	-4.59404	Nek7	Q9ES74	0.0757461	MI_IZ_vs_MI_remote
-0.369091	16.7773	-1.94958	0.0758653	0.15976	-4.93227	Acat1	Q8QZT1	0.0758653	MI_IZ_vs_MI_remote
0.760545	12.3575	2.10337	0.0760563	0.159968	-4.38442	Mcm5	P49718	0.0760563	MI_IZ_vs_MI_remote
0.275945	12.1863	1.94837	0.0760239	0.159968	-4.93416	Abce1	P61222	0.0760239	MI_IZ_vs_MI_remote
0.25838	14.0018	1.94769	0.0761129	0.15999	-4.93522	Myo1c	Q9WTI7	0.0761129	MI_IZ_vs_MI_remote
-0.424015	14.349	-1.9472	0.0761778	0.160029	-4.93599	Ndufb7	Q9CR61	0.0761778	MI_IZ_vs_MI_remote
-0.458308	16.464	-1.94551	0.0764006	0.1604	-4.93864	Atp12a;Atp1a1;Atp1a2;Atp1a3;Atp1a4	Q9WV27;Q8VDN2;Q9Z1W8;Q6PIC6;Q6PIE5	0.0764006	MI_IZ_vs_MI_remote
0.258388	13.4132	1.94489	0.0764825	0.160474	-4.93961	Akap12	Q9WTQ5	0.0764825	MI_IZ_vs_MI_remote
0.709683	13.3774	1.96212	0.0765914	0.160605	-4.85087	H2-Q6;H2-Q7;H2-Q8;H2-Q9	P14430;P14431;P79568;P14429	0.0765914	MI_IZ_vs_MI_remote
-0.308465	16.4164	-1.94294	0.0767399	0.160819	-4.94264	Hspd1	P63038	0.0767399	MI_IZ_vs_MI_remote
-0.290527	15.7362	-1.9384	0.0773432	0.161986	-4.94972	Bsg	P18572	0.0773432	MI_IZ_vs_MI_remote
-0.384225	14.7346	-1.93787	0.0774137	0.162035	-4.95054	Aldh4a1	Q8CHT0	0.0774137	MI_IZ_vs_MI_remote
0.267183	13.7652	1.93665	0.0775772	0.162181	-4.95245	Psme1	P97371	0.0775772	MI_IZ_vs_MI_remote
0.359279	12.0391	1.9369	0.0775425	0.162181	-4.95205	Srsf10	Q9R0U0	0.0775425	MI_IZ_vs_MI_remote
-0.288417	11.9205	-1.93457	0.0778558	0.162665	-4.95569	Mrpl21	Q9D1N9	0.0778558	MI_IZ_vs_MI_remote
0.451136	11.2638	1.97392	0.0779172	0.162696	-4.78307	Rhoa;Rhoc	Q9QUI0;Q62159	0.0779172	MI_IZ_vs_MI_remote
0.379347	10.7236	1.97334	0.0779912	0.162752	-4.78394	Ube2i	P63280	0.0779912	MI_IZ_vs_MI_remote
-0.314	14.2001	-1.9307	0.0783754	0.163455	-4.9617	Ndufb6	Q3UIU2	0.0783754	MI_IZ_vs_MI_remote
1.62027	12.101	1.99727	0.0784596	0.163532	-4.7088	Gm5478	A0A2R8VHP3	0.0784596	MI_IZ_vs_MI_remote
-0.281293	13.3435	-1.92857	0.0786643	0.16386	-4.96502	Dlg1	Q811D0	0.0786643	MI_IZ_vs_MI_remote
0.281652	11.9622	1.92545	0.0790872	0.164569	-4.96986	Gspt1	Q8R050	0.0790872	MI_IZ_vs_MI_remote
0.40279	13.2857	1.92536	0.0790994	0.164569	-4.97	Khdrbs1;Khdrbs2;Khdrbs3	Q9R226;Q60749;Q9WU01	0.0790994	MI_IZ_vs_MI_remote
0.345248	11.5979	1.92234	0.0795113	0.165326	-4.97468	Pnn	O35691	0.0795113	MI_IZ_vs_MI_remote
0.775462	11.636	1.9214	0.0796401	0.165495	-4.97614	Irgm1	Q60766	0.0796401	MI_IZ_vs_MI_remote
-0.40196	10.9529	-1.95904	0.0798405	0.165698	-4.753	Gstp1	P19157	0.0798405	MI_IZ_vs_MI_remote
0.512599	10.5554	1.92018	0.0798081	0.165698	-4.97804	Ythdf2	Q91YT7	0.0798081	MI_IZ_vs_MI_remote
0.26647	13.1157	1.91964	0.0798814	0.165698	-4.97887	Eif3i	Q9QZD9	0.0798814	MI_IZ_vs_MI_remote
0.312091	12.088	1.91745	0.0801829	0.165928	-4.98226	Tpr	F6ZDS4	0.0801829	MI_IZ_vs_MI_remote
0.377704	12.0719	1.91744	0.080184	0.165928	-4.98227	Capns1;Capns2	O88456;Q9D7J7	0.080184	MI_IZ_vs_MI_remote
0.297173	13.5878	1.91757	0.0801662	0.165928	-4.98208	Actn4	P57780	0.0801662	MI_IZ_vs_MI_remote
-0.286769	12.8708	-1.91826	0.0800718	0.165928	-4.98101	Rcn3	Q8BH97	0.0800718	MI_IZ_vs_MI_remote
-0.421108	14.8709	-1.91603	0.0803793	0.166232	-4.98447	Acads	Q07417	0.0803793	MI_IZ_vs_MI_remote
0.806621	10.4407	1.93088	0.0807294	0.166857	-4.8987	Srsf4;Srsf6	Q8VE97;Q3TWW8	0.0807294	MI_IZ_vs_MI_remote
0.247917	12.0117	1.91268	0.0808427	0.166991	-4.98965	Anxa4	P97429	0.0808427	MI_IZ_vs_MI_remote
0.365413	12.4582	1.91205	0.0809304	0.167073	-4.99062	Rps27l	Q6ZWY3	0.0809304	MI_IZ_vs_MI_remote
-0.357512	13.3051	-1.9117	0.0809787	0.167073	-4.99116	Nampt	Q99KQ4	0.0809787	MI_IZ_vs_MI_remote
-0.721815	11.3613	-1.97561	0.0812007	0.167431	-4.69452	Rock1;Rock2	P70336;P70335	0.0812007	MI_IZ_vs_MI_remote
0.434776	12.1268	1.94348	0.0819002	0.168773	-4.95972	Gfpt2	Q9Z2Z9	0.0819002	MI_IZ_vs_MI_remote
0.369841	13.8522	1.90466	0.0819642	0.168804	-5.00205	Pcbp1;Pcbp2;Pcbp3	Q61990;P60335;P57722	0.0819642	MI_IZ_vs_MI_remote
-0.278908	13.1741	-1.9026	0.0822547	0.169302	-5.00523	Dnpep	Q9Z2W0	0.0822547	MI_IZ_vs_MI_remote
0.420021	11.5382	1.90163	0.0823918	0.16945	-5.00673	Luc7l;Luc7l2	Q7TNC4;Q9CYI4	0.0823918	MI_IZ_vs_MI_remote
-0.321692	12.3454	-1.91851	0.0824244	0.16945	-4.91754	Mrpl13	Q9D1P0	0.0824244	MI_IZ_vs_MI_remote
0.542326	11.2827	1.99699	0.082895	0.170316	-4.72482	Cad;Cps1	Q8C196;B2RQC6	0.082895	MI_IZ_vs_MI_remote
-0.472506	15.6633	-1.89688	0.0830652	0.17047	-5.01405	Csrp3	P50462	0.0830652	MI_IZ_vs_MI_remote
0.413436	11.4399	1.89686	0.0830685	0.17047	-5.01409	Wbp11	Q923D5	0.0830685	MI_IZ_vs_MI_remote
0.315897	11.8218	1.89628	0.0831505	0.170537	-5.01497	Prpsap1;Prpsap2	Q9D0M1;Q8R574	0.0831505	MI_IZ_vs_MI_remote
0.615717	15.5906	1.89282	0.0836443	0.171449	-5.02029	Tf	Q921I1	0.0836443	MI_IZ_vs_MI_remote
-0.331674	12.5853	-1.90746	0.0839669	0.172008	-4.93433	Coro6	Q920M5	0.0839669	MI_IZ_vs_MI_remote
-0.491688	9.9947	-1.90681	0.0840573	0.172091	-4.9353	Golph3l	Q8R088	0.0840573	MI_IZ_vs_MI_remote
0.221743	14.2436	1.88737	0.0844296	0.172751	-5.02869	Gnb1;Gnb2;Gnb3;Gnb4	P29387;P62874;Q61011;P62880	0.0844296	MI_IZ_vs_MI_remote
0.499857	11.1599	1.90298	0.084599	0.172996	-4.94111	Tap1	P21958	0.084599	MI_IZ_vs_MI_remote
0.665317	18.2817	1.88076	0.0853896	0.174509	-5.03883	Hbb-b1;Hbb-b2;Hbb-bs;Hbb-y	P02104;P02089;P02088;A8DUK4	0.0853896	MI_IZ_vs_MI_remote
-0.318029	15.2003	-1.87776	0.0858282	0.175302	-5.04343	Ywhag	P61982	0.0858282	MI_IZ_vs_MI_remote
-0.280725	12.1976	-1.87522	0.0862019	0.175935	-5.04732	Stxbp1	O08599	0.0862019	MI_IZ_vs_MI_remote
-0.19995	12.5715	-1.87427	0.0863414	0.175935	-5.04877	Tjp1	P39447	0.0863414	MI_IZ_vs_MI_remote
-0.576081	10.5662	-1.93715	0.0862953	0.175935	-4.75052	Pxn	Q8VI36	0.0862953	MI_IZ_vs_MI_remote
0.401477	11.4423	1.91127	0.0863254	0.175935	-4.9373	Map3k20	Q9ESL4	0.0863254	MI_IZ_vs_MI_remote
-0.262155	11.8325	-1.87256	0.086594	0.176346	-5.05139	Ccdc51	Q3URS9	0.086594	MI_IZ_vs_MI_remote
0.268645	13.0127	1.87205	0.0866707	0.176399	-5.05218	Ipo5	Q8BKC5	0.0866707	MI_IZ_vs_MI_remote
0.389178	11.5121	1.87075	0.0868627	0.176685	-5.05416	Sec61a1	P61620	0.0868627	MI_IZ_vs_MI_remote
0.511478	12.8476	1.87033	0.0869253	0.176709	-5.05481	Plp2	Q9R1Q7	0.0869253	MI_IZ_vs_MI_remote
-0.293662	13.9363	-1.86948	0.0870511	0.176861	-5.05611	Ctnna1;Ctnna2	Q61301;P26231	0.0870511	MI_IZ_vs_MI_remote
0.364921	14.3356	1.869	0.0871223	0.176902	-5.05684	Klhl41	A2AUC9	0.0871223	MI_IZ_vs_MI_remote
0.23949	11.6767	1.86824	0.0872359	0.177029	-5.05801	Atxn2l	Q7TQH0	0.0872359	MI_IZ_vs_MI_remote
-0.285862	12.0742	-1.86678	0.0874538	0.177263	-5.06024	Huwe1	Q7TMY8	0.0874538	MI_IZ_vs_MI_remote
-0.292658	12.6924	-1.86703	0.0874155	0.177263	-5.05985	Timm21	Q8CCM6	0.0874155	MI_IZ_vs_MI_remote
0.34053	13.6543	1.96065	0.0875959	0.177343	-4.73053	Ier5	O89113	0.0875959	MI_IZ_vs_MI_remote
0.291224	12.0694	1.86615	0.0875479	0.177343	-5.0612	Smc3	Q9CW03	0.0875479	MI_IZ_vs_MI_remote
-0.245122	12.6659	-1.863	0.0880185	0.178095	-5.066	Eml1	Q05BC3	0.0880185	MI_IZ_vs_MI_remote
0.335494	12.9514	1.86253	0.0880903	0.178136	-5.06673	Hnrnpul2	Q00PI9	0.0880903	MI_IZ_vs_MI_remote
-0.40024	19.4533	-1.8619	0.0881837	0.178221	-5.06768	Col1a1	P11087	0.0881837	MI_IZ_vs_MI_remote
0.298917	11.1427	1.85863	0.0886767	0.179113	-5.07266	Atl3	Q91YH5	0.0886767	MI_IZ_vs_MI_remote
-0.626283	11.4378	-1.89279	0.0889636	0.179587	-4.8514	Grsf1	Q8C5Q4	0.0889636	MI_IZ_vs_MI_remote
0.371066	13.4454	1.99401	0.089019	0.179594	-4.70176	Fubp1;Fubp3;Khsrp	Q91WJ8;Q3U0V1;Q3TIX6	0.089019	MI_IZ_vs_MI_remote
0.300205	15.4651	1.85406	0.0893702	0.179995	-5.07963	Gsn	P13020	0.0893702	MI_IZ_vs_MI_remote
-0.422467	12.7667	-1.85421	0.0893471	0.179995	-5.0794	Aldh5a1	Q8BWF0	0.0893471	MI_IZ_vs_MI_remote
-0.273793	13.8966	-1.85404	0.0893734	0.179995	-5.07966	Ssbp1	Q9CYR0	0.0893734	MI_IZ_vs_MI_remote
0.549001	10.8755	1.88767	0.0897069	0.180561	-4.85894	Rheb	Q921J2	0.0897069	MI_IZ_vs_MI_remote
0.337713	11.8556	1.88727	0.089766	0.180575	-4.85953	Gar1	Q9CY66	0.089766	MI_IZ_vs_MI_remote
-0.235166	12.3265	-1.85076	0.0898745	0.180688	-5.08466	Utrn	E9Q6R7	0.0898745	MI_IZ_vs_MI_remote
0.219086	15.061	1.85007	0.0899802	0.180796	-5.08571	Rps2	P25444	0.0899802	MI_IZ_vs_MI_remote
0.256458	12.0423	1.84771	0.0903425	0.181419	-5.0893	Marcks	P26645	0.0903425	MI_IZ_vs_MI_remote
0.291997	14.3018	1.84553	0.0906772	0.181985	-5.0926	Gm7324;Rbmx;Rbmxl1;Rbmxl2	Q9WV02;Q91VM5;Q9DAE2;A0A2I3BRL8	0.0906772	MI_IZ_vs_MI_remote
0.43986	10.9196	1.93702	0.0907897	0.182105	-4.76395	Lypd8l	Q6YI28	0.0907897	MI_IZ_vs_MI_remote
0.360124	11.0378	1.84419	0.0908847	0.18219	-5.09464	Ppil1	Q9D0W5	0.0908847	MI_IZ_vs_MI_remote
0.512287	9.57366	1.90298	0.0910756	0.182467	-4.9596	Lyar	Q08288	0.0910756	MI_IZ_vs_MI_remote
0.278981	12.4379	1.83904	0.0916834	0.183579	-5.10245	Pgrmc1;Pgrmc2	Q80UU9;O55022	0.0916834	MI_IZ_vs_MI_remote
-0.225735	12.0932	-1.85397	0.091815	0.183736	-5.01488	Mrpl39	Q9JKF7	0.091815	MI_IZ_vs_MI_remote
-0.39231	12.154	-1.85187	0.0921369	0.184274	-5.01803	Tmem201	A2A8U2	0.0921369	MI_IZ_vs_MI_remote
-0.385781	11.2572	-1.89389	0.0923889	0.184564	-4.64051	Nt5c1a	A3KFX0	0.0923889	MI_IZ_vs_MI_remote
-0.436778	19.3555	-1.83469	0.0923643	0.184564	-5.10904	Myh1;Myh13;Myh2;Myh3;Myh4;Myh6;Myh7;Myh7b;Myh8	Q91Z83;B1AR69;G3UW82;Q02566;P13541;Q5SX39;P13542;A2AQP0;Q5SX40	0.0923643	MI_IZ_vs_MI_remote
0.469667	10.8311	1.89185	0.0926851	0.185049	-4.81594	Strn	O55106	0.0926851	MI_IZ_vs_MI_remote
-0.444254	15.0249	-1.83161	0.0928477	0.185267	-5.11369	Acss1	Q99NB1	0.0928477	MI_IZ_vs_MI_remote
0.238012	14.114	1.83115	0.0929201	0.185305	-5.11439	Rps7	P62082	0.0929201	MI_IZ_vs_MI_remote
-0.481878	11.2503	-1.88973	0.0929958	0.185349	-4.819	Sec16a	E9QAT4	0.0929958	MI_IZ_vs_MI_remote
-0.339797	13.7979	-1.82779	0.0934522	0.186152	-5.11948	Gcdh	Q60759	0.0934522	MI_IZ_vs_MI_remote
-1.27091	19.9639	-1.82526	0.0938542	0.186845	-5.1233	Tpm1;Tpm2;Tpm3;Tpm3-rs7	P58774;P58771;P21107;D3Z2H9	0.0938542	MI_IZ_vs_MI_remote
0.435566	12.6428	1.82244	0.0943038	0.187632	-5.12755	Plscr3	Q9JIZ9	0.0943038	MI_IZ_vs_MI_remote
-0.236202	12.8179	-1.81952	0.0947722	0.188456	-5.13196	L2hgdh	Q91YP0	0.0947722	MI_IZ_vs_MI_remote
0.370156	11.6878	1.81706	0.0951678	0.189025	-5.13566	Srp72	F8VQC1	0.0951678	MI_IZ_vs_MI_remote
-0.400891	15.3497	-1.81726	0.0951346	0.189025	-5.13535	Eci1	P42125	0.0951346	MI_IZ_vs_MI_remote
0.334294	12.5789	1.832	0.0952317	0.189044	-5.04766	Ambp	Q07456	0.0952317	MI_IZ_vs_MI_remote
0.389086	14.8901	1.80978	0.0963474	0.191149	-5.14661	Tuba1a;Tuba1b;Tuba1c;Tuba3b	P05213;P68373;P05214;P68369	0.0963474	MI_IZ_vs_MI_remote
-0.591471	12.4278	-1.80841	0.0965719	0.191484	-5.14868	Plin2	P43883	0.0965719	MI_IZ_vs_MI_remote
0.581922	10.0981	1.93639	0.0967119	0.191652	-4.58398	Fnta	Q61239	0.0967119	MI_IZ_vs_MI_remote
-0.342016	13.804	-1.80642	0.0968973	0.19191	-5.15166	Hspb2	Q99PR8	0.0968973	MI_IZ_vs_MI_remote
0.374636	12.4856	1.81853	0.0973818	0.192759	-5.06764	Bclaf1	Q8K019	0.0973818	MI_IZ_vs_MI_remote
-0.358759	11.0647	-1.80151	0.0977042	0.193271	-5.15902	Rala	P63321	0.0977042	MI_IZ_vs_MI_remote
0.237822	10.5494	1.80122	0.0977521	0.193271	-5.15946	Ago1;Ago2	Q8CJG0;Q8CJG1	0.0977521	MI_IZ_vs_MI_remote
0.201053	14.2077	1.80039	0.0978899	0.193433	-5.16071	Rplp0	P14869	0.0978899	MI_IZ_vs_MI_remote
0.351564	12.1677	1.79913	0.0980973	0.193732	-5.16259	Rhoa	Q9QUI0	0.0980973	MI_IZ_vs_MI_remote
0.501041	11.6476	1.85051	0.0989064	0.195219	-5.0356	Hexb	P20060	0.0989064	MI_IZ_vs_MI_remote
-0.260423	11.3952	-1.80742	0.0991898	0.195562	-5.08407	Phldb1	Q6PDH0	0.0991898	MI_IZ_vs_MI_remote
-0.361825	11.715	-1.80706	0.0992486	0.195562	-5.0846	Pank4	Q80YV4	0.0992486	MI_IZ_vs_MI_remote
0.530308	13.4662	1.79221	0.0992498	0.195562	-5.17294	Hpx	Q91X72	0.0992498	MI_IZ_vs_MI_remote
-0.249019	12.5255	-1.7907	0.0995035	0.195839	-5.1752	Bnip1	Q6QD59	0.0995035	MI_IZ_vs_MI_remote
-0.255356	13.1529	-1.79072	0.0995001	0.195839	-5.17517	Synpo	Q8CC35	0.0995001	MI_IZ_vs_MI_remote
-0.358852	17.1892	-1.78729	0.100077	0.196814	-5.18028	Decr1	Q9CQ62	0.100077	MI_IZ_vs_MI_remote
0.782528	12.244	1.96915	0.100113	0.196814	-4.56208	Rab32	Q9CZE3	0.100113	MI_IZ_vs_MI_remote
0.255914	12.8956	1.78624	0.100255	0.196982	-5.18186	Capn1	O35350	0.100255	MI_IZ_vs_MI_remote
0.372186	14.0322	1.78536	0.100403	0.197161	-5.18316	Lamp2	P17047	0.100403	MI_IZ_vs_MI_remote
0.344437	12.5046	1.79758	0.100816	0.197749	-5.09858	H2-K1	P01901	0.100816	MI_IZ_vs_MI_remote
0.381181	11.0887	1.78316	0.100777	0.197749	-5.18645	Lsm3	P62311	0.100777	MI_IZ_vs_MI_remote
-0.394035	12.9688	-1.78167	0.10103	0.198055	-5.18867	Mt-Cyb	P00158	0.10103	MI_IZ_vs_MI_remote
-0.276412	13.8606	-1.77859	0.101555	0.198972	-5.19326	Timm13	P62075	0.101555	MI_IZ_vs_MI_remote
0.210594	12.1272	1.77797	0.10166	0.199064	-5.19417	Ppid	Q9CR16	0.10166	MI_IZ_vs_MI_remote
-0.254635	13.0522	-1.77711	0.101808	0.199243	-5.19546	Fis1	Q9CQ92	0.101808	MI_IZ_vs_MI_remote
0.575909	11.7282	1.80827	0.102016	0.199458	-4.97473	Itga1	Q3V3R4	0.102016	MI_IZ_vs_MI_remote
-0.472183	10.6387	-1.8598	0.102034	0.199458	-4.69919	Snap91	Q61548	0.102034	MI_IZ_vs_MI_remote
0.333774	13.8227	1.76856	0.103283	0.201786	-5.20816	Pecam1	Q08481	0.103283	MI_IZ_vs_MI_remote
-0.488131	20.4736	-1.768	0.103379	0.201811	-5.20899	Acta1;Acta2;Actc1;Actg2	P63268;P62737;P68134;P68033	0.103379	MI_IZ_vs_MI_remote
-0.481205	13.1269	-1.78218	0.103412	0.201811	-5.12121	Tmod1;Tmod2;Tmod3	Q9JKK7;P49813;Q9JHJ0	0.103412	MI_IZ_vs_MI_remote
0.200052	13.9467	1.76726	0.103508	0.201885	-5.21009	Anxa7	Q07076	0.103508	MI_IZ_vs_MI_remote
-0.214564	13.1359	-1.76641	0.103655	0.202058	-5.21134	Gnas	Q6R0H7	0.103655	MI_IZ_vs_MI_remote
0.287529	14.3153	1.76587	0.10375	0.202129	-5.21215	Rpl23	P62830	0.10375	MI_IZ_vs_MI_remote
-0.418296	16.5345	-1.76549	0.103815	0.202142	-5.2127	Echs1	Q8BH95	0.103815	MI_IZ_vs_MI_remote
0.252414	12.197	1.76479	0.103939	0.202155	-5.21375	G3bp2	P97379	0.103939	MI_IZ_vs_MI_remote
-0.291273	11.0547	-1.76512	0.103881	0.202155	-5.21326	Rcsd1	Q3UZA1	0.103881	MI_IZ_vs_MI_remote
0.266564	14.5275	1.76414	0.104051	0.202194	-5.2147	Eno1	P17182	0.104051	MI_IZ_vs_MI_remote
1.36334	12.9034	1.88533	0.104076	0.202194	-4.65189	A2m;Pzp	Q6GQT1;Q61838	0.104076	MI_IZ_vs_MI_remote
-0.3825	12.4688	-1.76334	0.104191	0.202305	-5.21589	Ryr1;Ryr2	E9Q401;E9PZQ0	0.104191	MI_IZ_vs_MI_remote
-0.663312	16.1842	-1.77691	0.104313	0.202428	-5.12892	Myh3	P13541	0.104313	MI_IZ_vs_MI_remote
-0.383384	16.8041	-1.76146	0.10452	0.202716	-5.21867	Tubb4a;Tubb4b	Q9D6F9;P68372	0.10452	MI_IZ_vs_MI_remote
-0.288483	11.7506	-1.7909	0.10491	0.20313	-4.99975	Gfm2	Q8R2Q4	0.10491	MI_IZ_vs_MI_remote
0.226798	12.3625	1.75938	0.104887	0.20313	-5.22176	St13	Q99L47	0.104887	MI_IZ_vs_MI_remote
0.322163	11.3369	1.79102	0.104889	0.20313	-5.11398	Mcee	Q9D1I5	0.104889	MI_IZ_vs_MI_remote
0.277803	13.1274	1.75544	0.105582	0.204318	-5.22758	Prpf19	Q99KP6	0.105582	MI_IZ_vs_MI_remote
0.742793	18.372	1.7549	0.105677	0.204373	-5.22837	H1-4	P43274	0.105677	MI_IZ_vs_MI_remote
0.348725	13.8252	1.75461	0.105728	0.204373	-5.2288	Mlec	Q6ZQI3	0.105728	MI_IZ_vs_MI_remote
0.378946	11.9175	1.75341	0.105942	0.204671	-5.23058	Eif4e	P63073	0.105942	MI_IZ_vs_MI_remote
0.272356	12.7323	1.75148	0.106284	0.205218	-5.23342	Nup93	Q8BJ71	0.106284	MI_IZ_vs_MI_remote
0.341112	10.8104	1.74868	0.106785	0.20607	-5.23756	Bax	Q07813	0.106785	MI_IZ_vs_MI_remote
0.490909	10.5693	1.86663	0.106909	0.206194	-4.87551	Pdcl3	Q8BVF2	0.106909	MI_IZ_vs_MI_remote
0.658023	18.5292	1.74597	0.107271	0.206662	-5.24155	Alb	P07724	0.107271	MI_IZ_vs_MI_remote
-0.298304	13.222	-1.74617	0.107234	0.206662	-5.24124	Gstm1;Gstm3;Gstm7	P10649;P19639;Q80W21	0.107234	MI_IZ_vs_MI_remote
0.386396	13.7562	1.74264	0.107869	0.207699	-5.24644	Entpd1	P55772	0.107869	MI_IZ_vs_MI_remote
0.321827	11.0341	1.74165	0.108048	0.207928	-5.2479	Rpa2	Q62193	0.108048	MI_IZ_vs_MI_remote
0.663417	14.7725	1.73693	0.108905	0.20946	-5.25484	Ighg2b	P01867	0.108905	MI_IZ_vs_MI_remote
0.422561	12.159	1.73622	0.109033	0.209591	-5.25587	Apom	Q9Z1R3	0.109033	MI_IZ_vs_MI_remote
-0.442114	12.45	-1.73444	0.109359	0.2101	-5.25849	Prkar1a;Prkar1b	P12849;Q9DBC7	0.109359	MI_IZ_vs_MI_remote
-0.334621	11.9077	-1.73334	0.109559	0.210368	-5.2601	Cops8	Q8VBV7	0.109559	MI_IZ_vs_MI_remote
-0.270588	12.6647	-1.73166	0.109867	0.210842	-5.26256	Tomm40	Q9QYA2	0.109867	MI_IZ_vs_MI_remote
0.388343	11.4748	1.7599	0.110263	0.211375	-5.23037	Eif5b	Q05D44	0.110263	MI_IZ_vs_MI_remote
0.320568	12.3971	1.72934	0.110293	0.211375	-5.26596	Ssr4	Q62186	0.110293	MI_IZ_vs_MI_remote
0.321305	10.9253	1.72916	0.110328	0.211375	-5.26623	Eif5a;Eif5a2	Q8BGY2;P63242	0.110328	MI_IZ_vs_MI_remote
-0.358045	15.9443	-1.72334	0.111404	0.213318	-5.27475	Hsd17b10	O08756	0.111404	MI_IZ_vs_MI_remote
0.644863	12.4094	1.75197	0.11167	0.21371	-5.17016	Ptpn1	P35821	0.11167	MI_IZ_vs_MI_remote
-0.458775	11.8874	-1.72004	0.112017	0.214256	-5.27956	Smpx	Q9DC77	0.112017	MI_IZ_vs_MI_remote
0.41293	12.2491	1.71805	0.112389	0.214849	-5.28246	Hspa4;Hsph1	Q61316;Q61699	0.112389	MI_IZ_vs_MI_remote
0.775429	11.9738	1.82973	0.112722	0.215365	-4.67784	Me2;Me3	Q99KE1;Q8BMF3	0.112722	MI_IZ_vs_MI_remote
0.241618	13.7873	1.71495	0.112972	0.215724	-5.28699	Psmb4	P99026	0.112972	MI_IZ_vs_MI_remote
-0.377237	11.9808	-1.71426	0.113101	0.215852	-5.28799	Lancl1	O89112	0.113101	MI_IZ_vs_MI_remote
-0.423049	14.145	-1.71305	0.11333	0.21617	-5.28976	Myh1;Myh11;Myh13;Myh2;Myh3;Myh4;Myh6;Myh7;Myh7b;Myh8	Q91Z83;B1AR69;G3UW82;O08638;Q02566;P13541;Q5SX39;P13542;A2AQP0;Q5SX40	0.11333	MI_IZ_vs_MI_remote
0.550032	11.4973	1.70765	0.114352	0.217998	-5.29761	Blmh	Q8R016	0.114352	MI_IZ_vs_MI_remote
0.178762	13.5033	1.70394	0.11506	0.219227	-5.30301	Eif4g1	Q6NZJ6	0.11506	MI_IZ_vs_MI_remote
0.183009	13.3161	1.70349	0.115145	0.219269	-5.30365	Pdcd6ip	Q9WU78	0.115145	MI_IZ_vs_MI_remote
0.508917	12.4089	1.70246	0.115342	0.219523	-5.30515	Pon1	P52430	0.115342	MI_IZ_vs_MI_remote
0.784987	10.8916	1.81326	0.115414	0.219539	-4.74692	Mbl2	P41317	0.115414	MI_IZ_vs_MI_remote
-0.378361	16.4013	-1.69816	0.116169	0.220854	-5.31138	Cycs	P62897	0.116169	MI_IZ_vs_MI_remote
0.374193	12.3849	1.74613	0.116402	0.221176	-5.18408	Alox12b	O70582	0.116402	MI_IZ_vs_MI_remote
0.241298	12.3917	1.6949	0.116799	0.221687	-5.3161	Psme2	P97372	0.116799	MI_IZ_vs_MI_remote
-0.591044	10.9497	-1.77006	0.116776	0.221687	-4.8209	Shroom3	Q9QXN0	0.116776	MI_IZ_vs_MI_remote
0.245535	11.9396	1.69375	0.117022	0.22199	-5.31777	Bub3	Q9WVA3	0.117022	MI_IZ_vs_MI_remote
-0.314153	11.8317	-1.70627	0.117108	0.222031	-5.23118	Smim8	Q9CQQ0	0.117108	MI_IZ_vs_MI_remote
-0.700523	12.8906	-1.72122	0.117291	0.222135	-5.15253	Myh1;Myh2	G3UW82;Q5SX40	0.117291	MI_IZ_vs_MI_remote
0.218993	11.967	1.70564	0.117229	0.222135	-5.23208	Gnai1;Gnai2;Gnai3	P08752;Q9DC51;B2RSH2	0.117229	MI_IZ_vs_MI_remote
-0.377749	12.1095	-1.71931	0.117649	0.222568	-5.15523	Kif1a;Kif1b;Kif1c	P33173;Q60575;O35071	0.117649	MI_IZ_vs_MI_remote
-0.42343	17.5541	-1.69068	0.117619	0.222568	-5.32221	Etfa	Q99LC5	0.117619	MI_IZ_vs_MI_remote
-0.442513	12.0182	-1.70102	0.118113	0.223325	-5.23868	Tmem161a	Q8VCA6	0.118113	MI_IZ_vs_MI_remote
-0.501101	11.9814	-1.71505	0.118449	0.223838	-5.1076	Ggt5	Q9Z2A9	0.118449	MI_IZ_vs_MI_remote
-0.260029	12.2701	-1.69619	0.119045	0.224599	-5.24558	Pdpr	Q7TSQ8	0.119045	MI_IZ_vs_MI_remote
0.360504	10.831	1.75721	0.119046	0.224599	-4.81123	Vps35l	Q8BWQ6	0.119046	MI_IZ_vs_MI_remote
0.473401	10.8257	1.7119	0.119045	0.224599	-5.16569	Hnrnpll	Q921F4	0.119045	MI_IZ_vs_MI_remote
0.385836	13.1294	1.68202	0.119318	0.224988	-5.3347	Eif4a3	Q91VC3	0.119318	MI_IZ_vs_MI_remote
0.32312	12.6483	1.67925	0.119867	0.2259	-5.33869	Smarcc1;Smarcc2	Q6PDG5;P97496	0.119867	MI_IZ_vs_MI_remote
-0.224573	13.6985	-1.67829	0.120057	0.226136	-5.34008	Bag3	Q9JLV1	0.120057	MI_IZ_vs_MI_remote
0.963608	11.0539	1.74857	0.120596	0.227028	-5.02548	Rab27a;Rab27b	Q99P58;Q9ERI2	0.120596	MI_IZ_vs_MI_remote
-0.239095	16.3592	-1.67404	0.120904	0.227484	-5.34619	Lmna	P48678	0.120904	MI_IZ_vs_MI_remote
-0.913074	12.4799	-1.71967	0.121272	0.228052	-4.88204	Inmt	P40936	0.121272	MI_IZ_vs_MI_remote
-0.419239	15.6896	-1.66677	0.122363	0.229854	-5.35661	Aldoa;Aldoart1	P05064;A6ZI46	0.122363	MI_IZ_vs_MI_remote
0.255181	11.9732	1.69474	0.122335	0.229854	-5.1898	Nrdc	Q8BHG1	0.122335	MI_IZ_vs_MI_remote
-0.326242	13.4813	-1.66631	0.122456	0.229904	-5.35727	Usp5	P56399	0.122456	MI_IZ_vs_MI_remote
-0.241057	11.7247	-1.67728	0.122757	0.230345	-5.27248	Mrpl41	Q9CQN7	0.122757	MI_IZ_vs_MI_remote
0.682572	11.2579	1.7333	0.123381	0.230978	-5.04622	Rps6ka1;Rps6ka2;Rps6ka3	P18654;P18653;Q9WUT3	0.123381	MI_IZ_vs_MI_remote
0.49955	11.3885	1.70865	0.123355	0.230978	-5.12133	Srm	Q64674	0.123355	MI_IZ_vs_MI_remote
-0.224146	12.3588	-1.6628	0.123166	0.230978	-5.36229	Lpp	Q8BFW7	0.123166	MI_IZ_vs_MI_remote
-0.374736	11.6195	-1.67391	0.123429	0.230978	-5.27725	Maip1	Q8BHE8	0.123429	MI_IZ_vs_MI_remote
-0.286829	12.2475	-1.6617	0.123392	0.230978	-5.36388	Isyna1	Q9JHU9	0.123392	MI_IZ_vs_MI_remote
-0.295428	11.8686	-1.66074	0.123586	0.23113	-5.36524	Dhodh	O35435	0.123586	MI_IZ_vs_MI_remote
-0.261458	12.5691	-1.67284	0.123643	0.23113	-5.27877	AW551984;Vwa5a	Q8BGF0;Q99KC8	0.123643	MI_IZ_vs_MI_remote
-0.479766	19.9782	-1.66006	0.123726	0.23116	-5.36622	Myl3;Myl4	P09542;P09541	0.123726	MI_IZ_vs_MI_remote
-0.368791	11.4698	-1.67065	0.124083	0.231702	-5.28187	Tmed1	Q3V009	0.124083	MI_IZ_vs_MI_remote
-0.235375	12.3171	-1.65563	0.124631	0.232599	-5.37254	Sgta	Q8BJU0	0.124631	MI_IZ_vs_MI_remote
0.257716	11.8897	1.65339	0.125091	0.233332	-5.37573	Ralb	Q9JIW9	0.125091	MI_IZ_vs_MI_remote
0.619263	10.5809	1.66529	0.125163	0.23334	-5.28943	S100a14	Q9D2Q8	0.125163	MI_IZ_vs_MI_remote
-0.280557	12.1135	-1.65064	0.125659	0.234139	-5.37966	Acox1	Q9R0H0	0.125659	MI_IZ_vs_MI_remote
0.503947	9.45174	1.69421	0.126136	0.234903	-5.09372	Gbp2	Q9Z0E6	0.126136	MI_IZ_vs_MI_remote
-0.225371	12.6639	-1.64247	0.127358	0.23705	-5.39128	Hnrnph3	D3Z3N4	0.127358	MI_IZ_vs_MI_remote
0.450699	11.2994	1.66718	0.127796	0.237609	-5.36198	Colgalt1	Q8K297	0.127796	MI_IZ_vs_MI_remote
-0.44029	11.4563	-1.64042	0.127787	0.237609	-5.39419	Cenpv	Q9CXS4	0.127787	MI_IZ_vs_MI_remote
-0.196237	12.7571	-1.63801	0.128293	0.238279	-5.3976	Pmpca	Q9DC61	0.128293	MI_IZ_vs_MI_remote
-0.250097	13.259	-1.63826	0.128242	0.238279	-5.39725	Papln	Q9EPX2	0.128242	MI_IZ_vs_MI_remote
0.303548	12.2211	1.63523	0.12888	0.23924	-5.40154	Ywhaq	P68254	0.12888	MI_IZ_vs_MI_remote
-0.38564	11.7518	-1.64626	0.12907	0.239464	-5.31622	Prkar2a;Prkar2b	P12367;P31324	0.12907	MI_IZ_vs_MI_remote
-0.323804	12.5772	-1.6426	0.129833	0.240751	-5.32135	Acp6	Q8BP40	0.129833	MI_IZ_vs_MI_remote
0.740228	11.2695	1.69404	0.130821	0.242454	-4.89499	Ppp2ca;Ppp2cb;Ppp4c	P63330;P97470;P62715	0.130821	MI_IZ_vs_MI_remote
0.351032	11.6433	1.62445	0.131176	0.24298	-5.41677	Podxl	Q9R0M4	0.131176	MI_IZ_vs_MI_remote
0.277736	12.4897	1.62397	0.131279	0.243041	-5.41745	Srrm2	Q8BTI8	0.131279	MI_IZ_vs_MI_remote
0.418189	11.6411	1.64903	0.131509	0.243337	-5.1995	Rab3d;Rap1a;Rap1b	P35276;P62835;Q99JI6	0.131509	MI_IZ_vs_MI_remote
0.378208	13.2719	1.68686	0.132227	0.2445	-5.15633	Cfh;Cfhr4	E9Q8B5;P06909	0.132227	MI_IZ_vs_MI_remote
-0.340248	13.7265	-1.61901	0.132349	0.2445	-5.42444	Reep5	Q60870	0.132349	MI_IZ_vs_MI_remote
0.365399	13.5268	1.61912	0.132324	0.2445	-5.42428	Arhgdia	Q99PT1	0.132324	MI_IZ_vs_MI_remote
-0.260327	13.7936	-1.63031	0.132427	0.244513	-5.33853	Itgb6	Q9Z0T9	0.132427	MI_IZ_vs_MI_remote
0.388466	10.8622	1.61492	0.133236	0.245762	-5.43019	Pepd	Q11136	0.133236	MI_IZ_vs_MI_remote
-0.447756	11.1721	-1.71276	0.133245	0.245762	-4.82901	Myh10;Myh14	Q61879;Q6URW6	0.133245	MI_IZ_vs_MI_remote
-0.210703	12.7505	-1.60608	0.135173	0.249053	-5.4426	Ywhag;Ywhah	P61982;P68510	0.135173	MI_IZ_vs_MI_remote
0.287619	14.0098	1.60636	0.135111	0.249053	-5.4422	Tubb5	P99024	0.135111	MI_IZ_vs_MI_remote
-0.328198	10.7512	-1.64703	0.135626	0.249753	-5.15791	Dennd10	Q9D8N2	0.135626	MI_IZ_vs_MI_remote
-0.332604	11.9992	-1.60354	0.135732	0.249816	-5.44614	Tns2	Q8CGB6	0.135732	MI_IZ_vs_MI_remote
0.231896	15.6875	1.60174	0.136132	0.250021	-5.44867	Eef2	P58252	0.136132	MI_IZ_vs_MI_remote
-0.339186	11.5185	-1.61322	0.136109	0.250021	-5.36228	Tmem177	Q8BPE4	0.136109	MI_IZ_vs_MI_remote
0.203827	12.4952	1.61356	0.136035	0.250021	-5.36181	Mtap	Q9CQ65	0.136035	MI_IZ_vs_MI_remote
0.676618	8.49552	1.69856	0.135969	0.250021	-4.84714	Mrpl30	Q9D7N6	0.135969	MI_IZ_vs_MI_remote
0.386316	11.977	1.6667	0.136247	0.250099	-5.13578	Cars1	Q9ER72	0.136247	MI_IZ_vs_MI_remote
0.31735	12.2013	1.59927	0.13668	0.250374	-5.45211	Bak1	O08734	0.13668	MI_IZ_vs_MI_remote
0.277468	10.4291	1.62437	0.136712	0.250374	-5.28737	Gfpt1	P47856	0.136712	MI_IZ_vs_MI_remote
0.364339	12.4236	1.60011	0.136493	0.250374	-5.45094	Sec23a;Sec23b	Q01405;Q9D662	0.136493	MI_IZ_vs_MI_remote
0.191482	13.1856	1.59931	0.136672	0.250374	-5.45206	Eif3b	Q8JZQ9	0.136672	MI_IZ_vs_MI_remote
-0.425539	16.5808	-1.59892	0.136758	0.250374	-5.4526	Ndufab1	Q9CR21	0.136758	MI_IZ_vs_MI_remote
-0.412024	14.8814	-1.59696	0.137195	0.251042	-5.45534	Col3a1	P08121	0.137195	MI_IZ_vs_MI_remote
0.413067	11.4084	1.63804	0.137508	0.25148	-4.99156	Kyat1	Q8BTY1	0.137508	MI_IZ_vs_MI_remote
0.289164	11.6007	1.60598	0.137697	0.251633	-5.37231	Gnaq	P21279	0.137697	MI_IZ_vs_MI_remote
-0.245908	11.2949	-1.59454	0.137737	0.251633	-5.45872	Aebp1	Q640N1	0.137737	MI_IZ_vs_MI_remote
0.222803	13.6385	1.59366	0.137933	0.251859	-5.45994	Psma5	Q9Z2U1	0.137933	MI_IZ_vs_MI_remote
-0.208342	13.4222	-1.59284	0.138118	0.252063	-5.46108	Sar1b	Q9CQC9	0.138118	MI_IZ_vs_MI_remote
-0.278332	12.2725	-1.59241	0.138214	0.252106	-5.46168	Gm56451	A0A338P6I9	0.138214	MI_IZ_vs_MI_remote
-0.29647	12.5592	-1.61654	0.138402	0.252315	-5.29809	Mrps36	Q9CQX8	0.138402	MI_IZ_vs_MI_remote
-0.281041	11.2463	-1.60088	0.138824	0.252686	-5.37934	Rap1gds1	E9Q912	0.138824	MI_IZ_vs_MI_remote
0.651785	11.6986	1.65464	0.138707	0.252686	-5.15184	Cyfip1	Q7TMB8	0.138707	MI_IZ_vs_MI_remote
-0.190025	12.7208	-1.58976	0.138811	0.252686	-5.46537	Agk	Q9ESW4	0.138811	MI_IZ_vs_MI_remote
-0.332224	12.0707	-1.5883	0.139141	0.252998	-5.46741	Fkbp1a	P26883	0.139141	MI_IZ_vs_MI_remote
-0.327268	12.2743	-1.59974	0.139078	0.252998	-5.38092	Rcn1	Q05186	0.139078	MI_IZ_vs_MI_remote
-0.33412	15.4516	-1.58711	0.13941	0.253353	-5.46905	Ndrg2	Q9QYG0	0.13941	MI_IZ_vs_MI_remote
0.272887	11.0439	1.59715	0.139653	0.253662	-5.45681	Nucb2	P81117	0.139653	MI_IZ_vs_MI_remote
0.368356	11.7488	1.6271	0.139827	0.253844	-5.34841	Saa4	P31532	0.139827	MI_IZ_vs_MI_remote
-0.240519	12.946	-1.58314	0.140313	0.254592	-5.47458	Afg1l	Q3V384	0.140313	MI_IZ_vs_MI_remote
0.305389	12.3879	1.58276	0.140397	0.254612	-5.47509	Mcu	Q3UMR5	0.140397	MI_IZ_vs_MI_remote
0.528773	11.5164	1.57965	0.141108	0.255768	-5.47941	Ces1c	P23953	0.141108	MI_IZ_vs_MI_remote
0.474361	11.5379	1.57781	0.141529	0.256396	-5.48195	Mta1;Mta2;Mta3	Q8K4B0;Q9R190;Q924K8	0.141529	MI_IZ_vs_MI_remote
-0.214007	11.944	-1.57628	0.141882	0.25666	-5.48408	Vti1b	O88384	0.141882	MI_IZ_vs_MI_remote
-0.302199	10.8384	-1.57602	0.141941	0.25666	-5.48443	Pfkl;Pfkp	P12382;Q9WUA3	0.141941	MI_IZ_vs_MI_remote
0.245314	11.6115	1.57589	0.141971	0.25666	-5.48462	Stt3b	Q3TDQ1	0.141971	MI_IZ_vs_MI_remote
0.28971	13.3936	1.57636	0.141862	0.25666	-5.48396	Pcbp2;Pcbp3	Q61990;P57722	0.141862	MI_IZ_vs_MI_remote
0.233019	14.2303	1.57259	0.142731	0.257887	-5.48917	Copb2	O55029	0.142731	MI_IZ_vs_MI_remote
0.229976	14.9261	1.57198	0.142873	0.257887	-5.49002	Lmna;Lmnb1;Lmnb2	P21619;P48678;P14733	0.142873	MI_IZ_vs_MI_remote
-0.235315	12.4315	-1.57225	0.14281	0.257887	-5.48965	Mypn;Palld	Q5DTJ9;Q9ET54	0.14281	MI_IZ_vs_MI_remote
0.227641	12.3804	1.57159	0.142963	0.257914	-5.49056	Rras2	P62071	0.142963	MI_IZ_vs_MI_remote
0.265017	13.3226	1.5685	0.14368	0.259073	-5.49483	Cndp2	Q9D1A2	0.14368	MI_IZ_vs_MI_remote
0.360345	10.5389	1.60893	0.14376	0.259082	-5.20909	Spart	Q8R1X6	0.14376	MI_IZ_vs_MI_remote
-0.373033	10.9546	-1.56675	0.144087	0.259536	-5.49724	Lrba	Q9ESE1	0.144087	MI_IZ_vs_MI_remote
0.504099	12.794	1.65605	0.144443	0.260042	-4.97744	Cd68	P31996	0.144443	MI_IZ_vs_MI_remote
0.268658	11.6782	1.56472	0.14456	0.260119	-5.50003	Ube2l3	P68037	0.14456	MI_IZ_vs_MI_remote
0.21201	12.5821	1.56404	0.144721	0.260137	-5.50098	Ubl4a	P21126	0.144721	MI_IZ_vs_MI_remote
0.354215	11.2626	1.5749	0.144697	0.260137	-5.415	Synj1	Q8CHC4	0.144697	MI_IZ_vs_MI_remote
-0.275418	10.8282	-1.56252	0.145076	0.260504	-5.50306	Ctnna1;Ctnna3	P26231;Q65CL1	0.145076	MI_IZ_vs_MI_remote
0.410052	11.6069	1.57333	0.145058	0.260504	-5.41715	Pdlim7	Q3TJD7	0.145058	MI_IZ_vs_MI_remote
-0.531087	13.2601	-1.56007	0.145652	0.261403	-5.50644	Acsl6	Q91WC3	0.145652	MI_IZ_vs_MI_remote
0.312509	11.1051	1.55872	0.145968	0.261835	-5.50828	Vbp1	P61759	0.145968	MI_IZ_vs_MI_remote
-0.232813	11.6789	-1.56732	0.146451	0.262566	-5.42534	Mat2b	Q99LB6	0.146451	MI_IZ_vs_MI_remote
-0.533082	16.2188	-1.55598	0.146615	0.262724	-5.51205	Fhl2	O70433	0.146615	MI_IZ_vs_MI_remote
0.265677	11.8776	1.55466	0.146928	0.263147	-5.51386	Prep	Q9QUR6	0.146928	MI_IZ_vs_MI_remote
0.189445	15.0259	1.55376	0.147142	0.263394	-5.51509	Rpl27a	P14115	0.147142	MI_IZ_vs_MI_remote
0.335547	11.3545	1.55306	0.147308	0.263555	-5.51605	Nes	Q6P5H2	0.147308	MI_IZ_vs_MI_remote
0.426346	11.6907	1.56293	0.147474	0.263717	-5.50379	Cfhr4	E9Q8B5	0.147474	MI_IZ_vs_MI_remote
-0.220142	11.8605	-1.54933	0.148197	0.264873	-5.52117	Afdn	Q9QZQ1	0.148197	MI_IZ_vs_MI_remote
0.257262	13.6785	1.54859	0.148372	0.265049	-5.52217	Prex2	Q3LAC4	0.148372	MI_IZ_vs_MI_remote
-0.36482	12.6378	-1.54822	0.148461	0.265071	-5.52268	Txnrd2	Q9JLT4	0.148461	MI_IZ_vs_MI_remote
-0.176262	12.8923	-1.54728	0.148686	0.265335	-5.52396	Pnpt1	Q8K1R3	0.148686	MI_IZ_vs_MI_remote
0.355752	12.8153	1.54593	0.149011	0.265778	-5.52582	Rasip1	Q3U0S6	0.149011	MI_IZ_vs_MI_remote
-0.216969	12.1923	-1.54346	0.149605	0.2667	-5.52919	Mrrf	Q9D6S7	0.149605	MI_IZ_vs_MI_remote
0.180718	14.7362	1.54285	0.149751	0.266823	-5.53002	Stip1	Q60864	0.149751	MI_IZ_vs_MI_remote
0.276972	11.1942	1.5407	0.150269	0.267472	-5.53295	Znf326	O88291	0.150269	MI_IZ_vs_MI_remote
-0.283365	11.5019	-1.55137	0.150203	0.267472	-5.447	Rmdn3	Q3UJU9	0.150203	MI_IZ_vs_MI_remote
0.29325	11.9933	1.53907	0.150663	0.267956	-5.53517	Dpm1	O70152	0.150663	MI_IZ_vs_MI_remote
0.159999	13.3154	1.53893	0.150696	0.267956	-5.53536	Psma3	O70435	0.150696	MI_IZ_vs_MI_remote
-0.283955	10.8555	-1.5464	0.151389	0.268676	-5.45371	Cd81	P35762	0.151389	MI_IZ_vs_MI_remote
0.385985	11.3977	1.54631	0.151411	0.268676	-5.45384	Fdxr	Q61578	0.151411	MI_IZ_vs_MI_remote
0.32612	12.1476	1.53671	0.151236	0.268676	-5.53839	Aldh9a1	Q9JLJ2	0.151236	MI_IZ_vs_MI_remote
0.228041	10.4519	1.54654	0.151357	0.268676	-5.45353	Tmed2	Q9R0Q3	0.151357	MI_IZ_vs_MI_remote
0.23271	13.2436	1.53411	0.15187	0.269352	-5.54193	Ncln	Q8VCM8	0.15187	MI_IZ_vs_MI_remote
-0.374135	11.713	-1.55605	0.152096	0.269613	-5.32552	Ncam1	P13595	0.152096	MI_IZ_vs_MI_remote
-0.24553	11.9633	-1.54222	0.152394	0.270004	-5.45936	Dmac2l	Q9CRA7	0.152394	MI_IZ_vs_MI_remote
-0.336241	13.0623	-1.53105	0.152617	0.270262	-5.54609	Col5a1	O88207	0.152617	MI_IZ_vs_MI_remote
-0.225404	12.2594	-1.52844	0.153256	0.271206	-5.54962	Gfer	P56213	0.153256	MI_IZ_vs_MI_remote
0.212645	10.9414	1.53844	0.153307	0.271206	-5.46445	Ube2o	Q6ZPJ3	0.153307	MI_IZ_vs_MI_remote
0.320745	12.8623	1.52667	0.153692	0.271747	-5.55202	Pcbp1;Pcbp2;Pcbp3;Pcbp4	Q61990;P60335;P57722;P57724	0.153692	MI_IZ_vs_MI_remote
-0.265654	11.7571	-1.54797	0.154014	0.272177	-5.33628	Mtres1	Q9CQF4	0.154014	MI_IZ_vs_MI_remote
-0.280494	11.5466	-1.53456	0.154247	0.272451	-5.46966	Coa7	Q921H9	0.154247	MI_IZ_vs_MI_remote
-0.195246	12.5028	-1.52344	0.154489	0.272465	-5.55639	Lnpk	Q7TQ95	0.154489	MI_IZ_vs_MI_remote
0.470576	11.1177	1.53292	0.154649	0.272465	-5.47188	Manf	Q9CXI5	0.154649	MI_IZ_vs_MI_remote
-0.324618	14.9585	-1.52334	0.154516	0.272465	-5.55654	Aldh6a1	Q9EQ20	0.154516	MI_IZ_vs_MI_remote
-0.311982	10.3949	-1.5232	0.15455	0.272465	-5.55672	Pfn2	Q9JJV2	0.15455	MI_IZ_vs_MI_remote
-0.46572	14.016	-1.5228	0.154649	0.272465	-5.55726	Ehd1;Ehd2	Q9WVK4;Q8BH64	0.154649	MI_IZ_vs_MI_remote
-0.844807	11.6533	-1.57918	0.155054	0.273041	-5.29904	Polr2e	Q80UW8	0.155054	MI_IZ_vs_MI_remote
-0.331028	11.4238	-1.54313	0.155173	0.273111	-5.34271	Cox7a2l	Q61387	0.155173	MI_IZ_vs_MI_remote
-0.397148	14.2314	-1.52028	0.155275	0.273152	-5.56068	Eci2;Eci3	Q9WUR2;Q78JN3	0.155275	MI_IZ_vs_MI_remote
0.358097	12.5534	1.51935	0.155506	0.273419	-5.56193	Rac1	P63001	0.155506	MI_IZ_vs_MI_remote
0.269133	12.6501	1.5186	0.155691	0.273606	-5.56294	Stt3a	P46978	0.155691	MI_IZ_vs_MI_remote
0.195364	13.0135	1.51598	0.156346	0.274617	-5.56648	Hnrnpdl	Q9Z130	0.156346	MI_IZ_vs_MI_remote
-0.267041	12.4604	-1.51411	0.156816	0.275162	-5.56901	Hmgb3	O54879	0.156816	MI_IZ_vs_MI_remote
-0.22676	11.3869	-1.51436	0.156752	0.275162	-5.56866	Arpc5l	Q9D898	0.156752	MI_IZ_vs_MI_remote
0.411121	11.4365	1.52216	0.157293	0.275612	-5.48629	Btf3	Q64152	0.157293	MI_IZ_vs_MI_remote
-0.427857	10.731	-1.53465	0.157221	0.275612	-5.40836	Oxsm	Q9D404	0.157221	MI_IZ_vs_MI_remote
0.244592	12.737	1.51213	0.15731	0.275612	-5.57166	Ybx1;Ybx2;Ybx3	Q9Z2C8;P62960;Q9JKB3	0.15731	MI_IZ_vs_MI_remote
0.472369	10.2565	1.54776	0.157746	0.276236	-5.39243	Pus1	Q9WU56	0.157746	MI_IZ_vs_MI_remote
0.851446	9.69019	1.59326	0.157882	0.276333	-5.23595	Luc7l	Q9CYI4	0.157882	MI_IZ_vs_MI_remote
0.228169	10.2935	1.50938	0.158005	0.276408	-5.57537	Srrm1	Q52KI8	0.158005	MI_IZ_vs_MI_remote
0.305926	11.2379	1.50527	0.159044	0.278082	-5.58089	Erlin1;Erlin2	Q8BFZ9;Q91X78	0.159044	MI_IZ_vs_MI_remote
0.280867	11.4229	1.50479	0.159167	0.278082	-5.58154	Sec62	Q8BU14	0.159167	MI_IZ_vs_MI_remote
0.232965	13.4312	1.50465	0.159202	0.278082	-5.58173	Gng12	Q9DAS9	0.159202	MI_IZ_vs_MI_remote
0.397319	11.6134	1.50392	0.159387	0.278264	-5.5827	Nasp	Q99MD9	0.159387	MI_IZ_vs_MI_remote
0.286417	12.1698	1.5247	0.159656	0.278566	-5.42153	Ubxn4	Q8VCH8	0.159656	MI_IZ_vs_MI_remote
-0.233414	12.7907	-1.51242	0.159721	0.278566	-5.49929	Afg3l1;Afg3l2	Q920A7;Q8JZQ2	0.159721	MI_IZ_vs_MI_remote
0.235724	11.8617	1.50196	0.159885	0.278712	-5.58533	Itgav	P43406	0.159885	MI_IZ_vs_MI_remote
-0.33309	12.4586	-1.51101	0.160075	0.278762	-5.50117	Aldh1a1;Aldh1a7	O35945;P24549	0.160075	MI_IZ_vs_MI_remote
0.303625	11.2288	1.50147	0.160011	0.278762	-5.58599	Aldh18a1	Q9Z110	0.160011	MI_IZ_vs_MI_remote
0.323977	12.1827	1.4982	0.160846	0.279964	-5.59037	Usp7	Q6A4J8	0.160846	MI_IZ_vs_MI_remote
-0.209799	11.6258	-1.49666	0.161242	0.280512	-5.59243	Lin7a;Lin7b;Lin7c	O88951;O88952;Q8JZS0	0.161242	MI_IZ_vs_MI_remote
-0.254478	12.3666	-1.49562	0.161508	0.280694	-5.59382	Snx3	O70492	0.161508	MI_IZ_vs_MI_remote
-0.175687	12.8013	-1.4957	0.161489	0.280694	-5.59372	Bzw2	Q91VK1	0.161489	MI_IZ_vs_MI_remote
-0.279189	14.0747	-1.49525	0.161603	0.280718	-5.59431	Gstk1	Q9DCM2	0.161603	MI_IZ_vs_MI_remote
0.217187	13.9359	1.49411	0.161898	0.281088	-5.59584	Hnrnph1	O35737	0.161898	MI_IZ_vs_MI_remote
-0.229661	12.5711	-1.49366	0.162014	0.281148	-5.59644	Pdxdc1	Q99K01	0.162014	MI_IZ_vs_MI_remote
0.189237	15.8627	1.49078	0.162758	0.282157	-5.60029	Cavin1	O54724	0.162758	MI_IZ_vs_MI_remote
0.313058	13.3677	1.491	0.162702	0.282157	-5.6	Anp32a;Anp32b;Anp32c	Q64G17;Q9EST5;O35381	0.162702	MI_IZ_vs_MI_remote
0.439944	10.4379	1.5233	0.16367	0.283596	-5.42447	S100a16	Q9D708	0.16367	MI_IZ_vs_MI_remote
0.286659	11.7317	1.48666	0.163827	0.283726	-5.60578	Mgst1	Q91VS7	0.163827	MI_IZ_vs_MI_remote
[truncated: 1,521 more rows]

## Sheet: Fig 5D
source	score	p_value
MYC TARGETS V1	6.89047	6.57929e-12
COAGULATION	6.74717	1.76014e-11
ALLOGRAFT REJECTION	6.68329	2.71255e-11
E2F TARGETS	5.42753	6.10702e-08
COMPLEMENT	5.41925	6.39417e-08
G2M CHECKPOINT	4.41539	1.0391e-05
INFLAMMATORY RESPONSE	4.06302	4.95171e-05
INTERFERON GAMMA RESPONSE	3.91577	9.18527e-05
APICAL JUNCTION	3.36255	0.000780658
FATTY ACID METABOLISM	-4.55659	5.37878e-06
ADIPOGENESIS	-6.67021	2.96234e-11
MYOGENESIS	-7.95693	2.36906e-15
OXIDATIVE PHOSPHORYLATION	-12.5094	3.77724e-35

## Sheet: Fig 5E
gene	Specificity (snRNA-seq)	Log2 fold-change (Proteomics)
Npr3	6.4732	-0.269776
Cdh11	5.2079	-0.255494
Vwf	4.42818	1.39408
Vcam1	3.92655	0.751979
Ptgs1	4.15431	-0.0824333
Col4a4	3.37787	-0.11544
Enpp6	5.60596	0.244628
Fabp5	3.62482	0.497298
Col4a3	3.57765	-0.443311
Dpp4	4.94294	-0.0472691
Plvap	4.59049	0.202668
Megf6	4.36684	0.125465
Ahsg	6.59968	0.474365
Rab27a	2.90787	0.794516
Pdlim3	2.9595	-0.461687
Rbp1	2.71525	0.120058
Mmrn2	2.1382	0.29171
Ephx1	2.22152	-0.0975567
Cmas	2.2997	-0.0495431
Ncam1	2.74001	-0.374135
Icam2	2.17859	0.466529
Pgrmc1	2.49589	0.0687405
Lum	2.07101	-0.541548
Reck	2.04791	-0.259756
Dmtn	2.78708	0.329816
Adh1	2.4198	0.659326
Trim47	1.80506	0.356394
Ifitm2	1.36368	0.479319
Tppp	2.87329	0.1079
Ephx2	2.26702	-0.322604
Sorbs3	1.43162	-0.0797163
Cav2	1.10299	0.756138
Mgst1	1.9651	0.286659
Hsph1	0.464498	0.387364
Rpl7	1.23256	0.438693
Bst2	1.40904	0.512271
Abat	2.44009	-0.482339
Plcg2	1.17954	0.90675
Gsta4	3.39118	-0.0822515
Rps23	1.36407	0.507062
Rps3	1.38376	0.379064
Rpl19	0.946707	0.435532
Rpl26	1.28541	0.388868
Mfge8	1.04351	0.0448208
Rpl21	1.09876	0.480563
Nucb1	1.45954	-0.0550955
Thbd	1.37291	-0.975298
Crip1	1.24239	0.819734
Rpl18a	1.16058	0.472451
Dhrs7	1.58273	-0.143014
Rpl14	1.03003	0.337037
Rpl18	1.07738	0.374536
Rps4x	1.0874	0.33411
Tmed4	1.90377	-0.177056
Slc44a2	1.0613	0.0881006
Rps6	1.33792	0.406455
Mapk3	1.06353	-0.0292011
Ecm1	1.11183	1.61788
Rps25	1.16266	0.413113
Lrpap1	1.22299	-0.328573
Rps5	0.821555	0.399029
Rps11	1.23875	0.384928
Rabac1	1.0093	0.0320358
Tubb4b	0.990539	-0.386319
Tinagl1	0.623361	0.211397
Clu	0.618764	1.42541
Soat1	0.686769	1.05392
Rps10	1.13083	0.31245
Sord	1.67728	0.0784452
Arhgdib	0.530607	2.18337
Ddah2	1.24269	0.0818302
Slc29a1	0.998256	-0.130594
Gstm1	0.966463	-0.105498
Icam1	0.292197	1.11246
Rps7	1.06651	0.238012
Fis1	0.860568	-0.254635
Pcyox1	1.2414	-0.0778945
Rps19	1.00826	0.379858
Hnrnpa0	1.01793	0.119532
S100a16	0.765687	0.439944
Tubb5	0.90698	0.287619
Caskin2	0.798078	0.106427
Mettl7a1	1.49675	-0.159428
Ptk7	1.28766	-0.0658348
Cox7a2l	1.24739	-0.331028
Abhd16a	1.0228	-0.229649
Rpl28	0.701549	0.316462
Gng5	1.17883	-0.106647
Fgl2	0.905277	0.481995
Ndrg1	0.569944	0.282357
Prelp	1.08423	-0.865343
Rpl13a	0.76019	0.374478
Paics	1.11016	-0.15771
Lgals9	0.475996	-0.0185553
Txndc5	0.965192	0.0646187
Rpl29	0.878107	-0.141102
Emilin1	0.529324	-0.161595
Erap1	0.731708	-0.141745
Ssr3	0.719575	0.0245559
Anpep	0.542642	-0.134119
Sod1	0.944405	0.215077
Psmb9	0.745357	0.246254
Rps20	0.44625	0.165967
Rpl24	0.80494	0.241602
Rpl17	0.602832	0.464593
Rcn1	0.955736	-0.327268
Rras	1.15456	-0.172848
Arl1	1.19582	0.305759
Cyb5r3	0.946777	-0.218619
Ppp1ca	0.675434	0.382678
Gbp2	0.463648	0.503947
Irgm1	0.672398	0.775462
Sfxn1	0.89854	0.477455
Rpl4	0.693013	0.362989
Ddrgk1	1.17263	-0.217934
Rcn3	0.795282	-0.286769
Col18a1	0.889564	0.446134
Mfap5	0.301662	0.401662
Lbr	0.509771	1.20006
Gstt1	0.716805	-0.763746
Uqcrb	1.0587	-0.53594
Tmed3	1.07165	-0.513876
Slc3a2	0.720096	0.562175
Lta4h	0.741214	0.489266
Psmb8	0.4254	0.496824
Tomm20	0.90086	-0.128539
Selenbp1	0.734942	-0.180152
Csrp2	0.919252	0.234641
Tmed7	0.924195	0.0111068
Rpl39	0.813561	0.371425
Fmo5	0.954695	-0.208476
Gsdmd	0.788748	0.560565
Hbb-bs	1.77895	1.02543
Sh3bgrl3	0.639379	0.550686
Tmem205	1.3092	-0.225971
Rcn2	0.699171	-0.47686
Acly	0.789802	0.618073
Eef1d	0.660123	0.0755156
Dad1	0.613353	0.253095
Ppib	0.618785	0.316586
Blvrb	0.885708	0.620067
Rpl30	0.938679	0.304967
Bcap31	0.608517	0.175257
Cacybp	0.663834	0.474755
Pebp1	0.881111	-0.265296
Tmem109	0.687394	-0.0039258
Rps17	1.02921	0.267937
Nid2	0.443498	-0.247071
Rpl35a	0.639158	0.444692
Kctd12	0.394381	0.554942
Psma6	0.79409	0.0833546
Spcs2	0.711052	0.399475
Pnp	0.816376	1.36121
Gvin1	0.12915	1.05627
M6pr	0.813457	0.489116
Spcs1	1.26493	0.368197
Ctsz	0.313442	0.83118
Impa1	1.03762	0.14544
Sec13	0.749998	-0.0176267
Snrpd2	0.596763	0.531054
Arf5	0.759366	0.136457
Ptbp1	0.557157	0.624229
Tomm34	0.590832	0.331702
Rpl32	0.284897	0.389285
Dctn3	1.09635	-0.116376
Csrp1	0.316881	-0.0761022
Copb2	0.688404	0.233019
Tamm41	1.28362	-0.0803956
Cwc15	0.956639	0.502593
Sub1	0.636413	0.901286
Srp14	1.01045	-0.237205
Slc25a5	1.33869	-0.558259
Aldh3a2	0.994956	-0.0316426
Ctnnd1	0.778172	0.12245
Vamp2	0.561554	-0.452141
Gpd2	0.455403	0.128789
Agrn	0.8782	-0.0805666
Sec22b	0.61355	-0.00156925
Tmed9	0.347352	0.36948
Rpl34	0.62864	0.382498
Vat1	0.993717	-0.030977
Ppic	0.394561	0.283265
Ssr4	0.961582	0.320568
Ruvbl1	0.879957	0.43889
Gimap4	0.314141	-0.0842686
S100a11	0.475411	0.897237
Rpl11	0.619096	0.440692
Atp6v1g1	0.463666	0.595549
Pcbp1	0.546655	0.25828
Mrpl18	1.54095	-0.523802
0610012G03Rik	1.38738	-0.754409
Plscr3	0.32366	0.435566
Rps16	0.315827	0.300208
Pmpcb	1.20427	-0.350393
Eml2	0.597503	-0.313419
Naga	0.707251	0.671118
Maoa	0.787903	-0.537301
Lman2	0.670013	0.139277
Upf1	0.4963	0.0952142
Ppp2r1a	0.519567	-0.131336
Ahsa1	0.890301	-0.0502318
Vps26b	0.599929	-0.018316
Gpx1	0.570624	0.704637
Emc3	0.513449	-0.0788082
Ckap4	0.534101	-0.0302011
Snrnp200	0.524056	0.421704
Ap2s1	0.189237	0.205301
S100a1	0.947697	-0.515682
Mrps26	0.636306	-0.390784
Vps29	0.438004	-0.186762
Gna11	0.219247	-0.205153
Rplp0	0.560756	0.201053
Psme1	0.266671	0.267183
Mrpl28	0.59647	-0.395464
Prpf8	0.287088	0.370157
Fkbp8	0.571949	-0.231476
Ahnak2	0.736423	-0.117596
Ndufb11	0.57166	-0.616428
Tmx1	0.69915	-0.179585
Dhdh	1.42072	0.376093
Gclm	0.39829	0.0657024
Sri	0.562203	0.507557
Cdc37	0.673242	-0.0381684
Swi5	0.605579	0.279458
Rpl37a	0.328641	0.329824
Eif3b	0.155544	0.191482
Cdipt	0.269763	-0.128064
Lman1	0.551666	-0.0574825
Tcea1	0.578809	0.412967
Eif5a	0.483202	0.616109
Use1	0.776123	0.0417917
Anp32b	0.395784	1.11961
Lamtor1	0.468018	-0.158897
Prdx2	0.589805	-0.0947125
Rer1	0.856308	-0.150074
Ndufa2	0.765256	-0.713383
Tmco1	0.544114	0.123994
Ndufc2	0.600183	-0.632547
Mat2b	0.443524	-0.232813
Glod4	0.73513	0.0715112
Ndufa8	0.569071	-0.768038
Sec23ip	0.398576	0.129275
Surf4	0.48915	-0.014913
Tollip	0.638994	0.0778432
Wdr82	0.305327	0.352258
Ndufa7	0.381179	-0.498894
Snw1	0.251299	0.334194
Psmb4	0.204472	0.241618
Ap2a1	0.292094	0.00765961
Aip	0.933829	0.101689
Sptlc1	0.537343	0.478046
Ndufa6	0.471709	-0.723058
Hint1	0.294238	-0.143183
Pdcd6	0.787544	0.0954168
Copg1	0.353866	0.0911495
Ndufb10	0.64415	-0.530698
Ube2m	0.659896	-0.0482897
Cbx3	0.268621	0.899112
Glo1	0.471499	-0.231982
Arhgap1	0.669904	0.231972
Wbp11	0.30012	0.413436
Ywhah	0.167315	0.101302
Abhd10	0.676063	-0.915293
Tap1	0.139208	0.499857
Timm13	0.125362	-0.276412
Ghitm	0.533705	-0.591796
Snrpe	0.448396	-0.123649
Ppp1r7	0.472934	0.194849
Rab1b	0.782487	-0.0382334
Pbxip1	0.166931	-0.395492
Hnrnpab	0.317854	0.707233
Rab8a	0.340312	0.124893
Atp6v1e1	0.577208	0.368197
Echdc1	0.428452	-0.517917
Ndufs7	1.03045	-0.566161
Txndc17	0.773393	0.22519
Scamp2	0.37209	0.28668
Fdx1	1.2593	-0.833321
Ncstn	0.272588	0.588969
Rbbp7	0.157677	0.243311
Ppat	0.873951	-0.267194
Sar1a	0.104208	-0.232075
Cox6c	0.324241	-0.571784
Uqcrfs1	0.452994	-0.593502
Mrps7	0.524023	-0.00685368
Mta2	0.242021	0.366557
Poldip3	0.386968	0.286554
Rbm22	0.58535	0.691067
Mcur1	0.277793	-0.370095
Kpnb1	0.189897	0.301776
Plxnb2	0.643539	0.0586222
Tecr	0.532923	-0.0110156
Eml5	1.23958	0.570133
Zmpste24	0.327633	0.739336
Cct2	0.239918	0.307707
Ccdc47	0.669631	0.0380327
Rpl22	0.208026	0.124013
Rab18	0.401823	-0.253959
Fkbp4	0.68649	-0.0560941
Ndufb7	0.500438	-0.424015
Acp1	0.655949	-0.0181309
Puf60	0.476903	0.363764
Dynlrb1	0.719074	0.255632
Bub3	0.390337	0.245535
Snap29	0.440498	0.186088
Get4	0.53339	-0.480553
Pdia6	0.453016	0.283566
Polr2e	0.715237	-0.844807
Set	0.30551	0.943624
Prkcsh	0.234496	0.067038
Ccdc90b	0.274835	-0.346175
Sh3glb2	0.352451	-0.05777
Ak3	0.505115	-0.06698
Mrpl4	0.615378	-0.0316832
Rbm3	0.384013	1.1745
Plcd1	0.705058	-0.0346326
Pdap1	0.330024	0.436637
Nedd8	0.29101	-0.42648
Aldh7a1	0.293175	-0.082586
Cops8	0.567114	-0.334621
Slc25a11	0.477156	-0.437923
Msrb2	0.836204	0.177001
Mrpl9	0.768648	-0.43422
Rps28	0.214486	0.325596
Psma7	0.255586	0.124834
Ndufa11	0.229715	-0.0263832
Hint3	0.540916	-0.538322
Psmd5	0.818695	0.105502
Nucb2	0.170877	0.272887
Sgta	0.397236	-0.235375
Me2	0.428308	1.78074
Rpa1	0.265063	0.679184
Acad12	0.905533	-0.548428
Iah1	0.171401	0.0307188
Cops7a	0.39699	-0.448007
Snrpd1	0.169057	0.595532
Dap3	0.489493	-0.317338
Mcee	0.383266	0.322163
Parp1	0.119894	0.377618
Hagh	0.431752	-0.282196
Ppp3r1	0.551207	0.0252308
Serhl	0.904237	-0.36087
Hdgf	0.214317	0.189537
Hcfc1	0.385461	0.486609
Pfdn2	0.259342	0.00954892
Sart3	0.370497	0.181495
Prpf19	0.461515	0.277803
Nubpl	0.462256	0.0187073
Sar1b	0.26253	-0.208342
Pdia5	0.512653	0.150442
Igbp1	0.175426	-0.0272272
Park7	0.217738	-0.0653739
Eif2b4	0.168836	0.134362
Ndufa4	0.373032	-0.695768
Dpy30	0.274632	0.40898
Prdx6	0.532803	0.0920902
Cope	0.277652	0.50162
Commd3	0.406214	-0.634393
Rab35	0.242622	0.293959
Armc1	0.189041	-0.57346
Mrpl10	0.311025	-0.318068
Erh	0.312094	0.744204
Diablo	0.309004	-0.339971
Cyb5r1	0.172159	-0.40165
Eif2s3x	0.666981	0.439412
Hspa12a	0.411436	-0.107848
Pmpca	0.284822	-0.196237
Sirt5	0.56447	-0.10431
Uqcr10	0.413372	-0.472611
Cd63	0.107348	0.558382
Ppm1g	0.292886	0.21105
Ndufaf2	0.555553	-0.480488
Apmap	0.943793	0.180773
Cirbp	0.420582	-0.0904373
Tcp1	0.168754	0.366046
Timm22	0.175378	-0.750861
Lancl1	0.193994	-0.377237
Psmd3	0.589543	-0.108978
Strap	0.340588	0.0504633
Mrpl24	0.487197	-0.513009
Ap1m1	0.615614	0.455711
Ssbp1	0.174509	-0.273793
Nup133	0.425944	0.302054
Cyc1	0.405958	-0.643875
Polr2b	0.152075	0.304655
Arfgap2	0.125121	-0.10894
Mavs	0.177899	-0.11651
Hspe1	0.549282	-0.338286
Arpp19	0.252538	0.199477
Gstz1	0.121577	0.274804
Lin7c	0.324415	-0.0874602
Pfkl	0.420929	-0.164135
Gdpd1	1.36522	0.310784
Hccs	0.132375	-0.31144
Mrps10	0.190083	-0.30819
Usp5	0.581112	-0.326242
Cct5	0.125273	0.29009
Tars2	0.139209	-0.218279
Ndufb9	0.123654	-0.698473
Pdhx	0.363591	-0.560771
Ech1	0.327841	-0.584892
Ppp5c	0.126437	-0.0827236
Sart1	0.373232	0.572979
Chchd6	0.111492	-0.322598
Plin3	0.133306	-0.352686
Nsfl1c	0.153421	0.164038
Tmem126a	0.349386	-0.391502
Ndufaf5	0.102367	-0.115609
Timm44	0.213901	-0.277091
Coq10a	0.244027	-0.612648
Psma4	0.225509	0.360388
Ddx1	0.127426	0.165433
Nadk2	0.283738	-0.145973
Aifm1	0.334257	-0.470009
Pdha1	0.260311	-0.636558
Ak2	0.350776	-0.343119
Tmx4	0.241907	-0.221999
Echs1	0.256215	-0.418296
Cox6a2	0.250908	-0.700846
Spcs3	0.398474	0.461794
Trappc3	0.206415	0.00734908
Ppa2	0.153976	-0.469328
Dnajb11	0.277018	0.357598
Tmem161a	0.223341	-0.442513

## Sheet: Figure 5F
gene	sample	exp	group
Vcam1	s_1_control_r1	12.3538	Control
Vcam1	s_2_control_r2	12.4811	Control
Vcam1	s_3_control_r3	12.0429	Control
Vcam1	s_4_MI_IZ_r1	13.2667	MI_IZ
Vcam1	s_5_MI_IZ_r2	13.4211	MI_IZ
Vcam1	s_6_MI_IZ_r3	13.5436	MI_IZ
Vcam1	s_7_MI_IZ_r4	13.603	MI_IZ
Vcam1	s_8_MI_remote_r1	12.6174	MI_remote
Vcam1	s_9_MI_remote_r2	13.0193	MI_remote
Vcam1	s_10_MI_remote_r3	12.5284	MI_remote
Vcam1	s_11_MI_remote_r4	12.6614	MI_remote
Cdh11	s_1_control_r1	12.5499	Control
Cdh11	s_2_control_r2	12.493	Control
Cdh11	s_3_control_r3	12.0815	Control
Cdh11	s_4_MI_IZ_r1	11.7666	MI_IZ
Cdh11	s_5_MI_IZ_r2	11.7983	MI_IZ
Cdh11	s_6_MI_IZ_r3	12.0677	MI_IZ
Cdh11	s_7_MI_IZ_r4	12.3678	MI_IZ
Cdh11	s_8_MI_remote_r1	11.9786	MI_remote
Cdh11	s_9_MI_remote_r2	12.3996	MI_remote
Cdh11	s_10_MI_remote_r3	12.1638	MI_remote
Cdh11	s_11_MI_remote_r4	12.4803	MI_remote
Vwf	s_1_control_r1	12.9062	Control
Vwf	s_2_control_r2	12.8971	Control
Vwf	s_3_control_r3	12.7829	Control
Vwf	s_4_MI_IZ_r1	13.8019	MI_IZ
Vwf	s_5_MI_IZ_r2	14.1282	MI_IZ
Vwf	s_6_MI_IZ_r3	15.2409	MI_IZ
Vwf	s_7_MI_IZ_r4	14.563	MI_IZ
Vwf	s_8_MI_remote_r1	12.8371	MI_remote
Vwf	s_9_MI_remote_r2	13.3444	MI_remote
Vwf	s_10_MI_remote_r3	12.9229	MI_remote
Vwf	s_11_MI_remote_r4	13.0531	MI_remote

## Sheet: Figure 5I
Sample	Group	Normalized Expression
sample13_Donor	Donor	2.90851
sample32_Donor	Donor	2.49972
sample33_Donor	Donor	2.14162
sample34_Donor	Donor	2.89121
sample39_Donor	Donor	2.9546
sample41_Donor	Donor	3.2628
sample4_AMI	AMI	3.7197
sample5_AMI	AMI	3.78411
sample8_AMI	AMI	3.93032
sample42_AMI	AMI	3.19776
