# Supplementary material for: Spatial multiomics of acute myocardial infarction reveals immune cell infiltration through the endocardium
Source: Springer Nature journal article supplement (doi:10.1038/s44161-025-00717-y), 2025-10-03
Supplement: MOESM8 [file 44161_2025_717_MOESM8_ESM.xlsx]

## Sheet: Fig 6B
Replicate	MFI vWF	Ccr2+ cells per mm^2
infarct_1	348.553	1279.6
infarct_1	324.297	947.46
infarct_1	1010.8	4540.2
infarct_1	398.378	594.77
infarct_1	368.863	1035.7
infarct_1	255.622	435.23
infarct_1	354.305	1242.6
infarct_1	256.219	449.45
infarct_1	424.227	1407.4
infarct_1	418.837	2497.4
infarct_1	1341.86	1368.4
infarct_1	332.326	530.7
infarct_1	308.428	511.75
infarct_1	1034.32	832.31
infarct_1	1228.96	3814.6
infarct_1	300.67	1539.5
infarct_1	644.815	2072.1
infarct_1	652.835	848.06
infarct_1	375.107	2717.7
infarct_1	294.704	1266.4
infarct_1	1988.24	4733.8
infarct_1	274.734	1621.2
infarct_1	622.868	2130.5
infarct_1	319.226	825.74
infarct_1	296.737	721.42
infarct_1	282.511	1299.5
infarct_1	246.913	526.67
infarct_1	477.691	987.85
infarct_1	348.691	1554.8
infarct_1	381.697	1683.2
infarct_1	237.431	909.2
infarct_1	542.01	920.32
infarct_1	512.19	1826.4
infarct_1	1892.92	5042
infarct_1	290.334	1454.8
infarct_1	342.395	909.28
infarct_1	719.848	2981.2
infarct_1	288.458	429.37
infarct_1	345.17	1041.4
infarct_1	1066.73	3625.4
infarct_1	332.015	0
infarct_1	320.051	2058.1
infarct_1	1703.64	5308.6
infarct_1	288.311	0
infarct_1	273.598	523.16
infarct_1	1061.05	961.25
infarct_1	380.195	905.33
infarct_1	410.861	470.81
infarct_1	342.623	1874.8
infarct_1	477.878	1151.8
infarct_1	783.141	2084.4
infarct_1	308.812	1552.9
infarct_1	824.789	1473.4
infarct_1	264.456	570.87

## Sheet: Fig 6D
region	control				anti-vWF
endo	803.593	714.627	702.659		349.071	262.993	143.347
core	54.5341	46.8392	124.796		152.079	98.198	45.3625
epi	90.9296	331.981	203.398		187.455	305.873	86.6598
BZ	177.277	243.905	307.755		370.731	277.98	425.082

## Sheet: Fig 6G-L
LV EF	control	anti-vWF		HW / BW	control	anti-vWF
in %	30.4757	28.9308		in mg/g	5.50459	5.68889
	36.8994	28.9211			4.74576	5.59633
	33.6565	21.0159			5.37736	6.95652
	42.8847	32.9029			5.11312	5.62791
	34.8666	26.5724			5.15695	5.13393
	32.4945	26.3167			5.23605	5.61576
	39.6827	20.5318			5.27273	6.08696
	37.9766	27.4175			5.19915	5.71429
LV EDV	control	anti-vWF		infarct thickness	control	anti-vWF
in µl	77.7876	92.7978		in µm	181	158
	55.3837	74.0147			212	211
	53.6701	120.399			213	154
	46.2134	46.5308			173	210
	57.3474	52.292			273	193
	60.4494	60.8952			241	189
	36.5725	126.184			197	152
	44.7916	62.6406			207	149
LV ESV	control	anti-vWF		global longitudinal strain	control	anti-vWF
in µl	53.9837	66.0056		in -%	8.9	7.09
	34.917	52.9848			11.4	8.742
	35.5027	95.6553			7.25	3.695
	26.2628	31.2262			10.42	9.65
	38.0095	38.3692			7.5	8.68
	40.7757	44.8687			7.855	5.6
	22.0931	100.356			12.195	6.195
	28.5887	45.5317			8.54	6.22
