# Supplementary material for: Spatial multiomics of acute myocardial infarction reveals immune cell infiltration through the endocardium
Source: Springer Nature journal article supplement (doi:10.1038/s44161-025-00717-y), 2025-10-03
Supplement: MOESM9 [file 44161_2025_717_MOESM9_ESM.xlsx]

## Sheet: Extended Data Figure 2B+C
	mean_iou	std_iou	mean_dice	std_dice	mean_precision	std_precision	mean_recall	std_recall	mean_f1	std_f1	catastrophes	splits	merges	true_positives	false_positives	false_negatives
mesmer_nuclear	0.685783	0.0411656	0.810136	0.0289865	0.464378	0.102213	0.295778	0.0647174	0.359547	0.0745839	2	9	12	353	400	855
mesmer_wholecell	0.691973	0.0296552	0.812433	0.0211241	0.514992	0.127723	0.46944	0.131542	0.489629	0.127563	38	31	49	567	515	641
cellpose_cyto	0.760009	0.0888041	0.857364	0.0597573	0.692103	0.256389	0.417566	0.186859	0.515992	0.215975	5	3	28	521	194	687
cellpose_custom	0.822116	0.0334554	0.898709	0.0211995	0.902489	0.0527938	0.933976	0.0566603	0.917574	0.0513455	2	6	4	1124	124	84

## Sheet: Extended Data Figure 2D
Segmentation coverage										Percent spot assigned
sample	segmentation_method	cardiac_area	cardiac_area_mm2	segmented_area	segmented_area_mm2	coverage	num_cells	r_coverage		sample_id	segmentation_method	total_cells	avg_area	total_spots	spot_assign_per_cell	spot_assign_total	spot_assign_percent	duplicated_total	labels_total	labels_below_thresh	labels_above_thresh
Control_12	mesmer_nuclear	327158740	17.3067	63163670	3.34136	19.3067	56119	0.193067		4h_r1_s1	mesmer_nuclear	12275	3374.99	3036550	85.2	1045793	34.44	553	12299	24	0
Control_12	mesmer_wholecell	327158740	17.3067	157904286	8.35314	48.2653	68092	0.482653		2d_r2_s1	mesmer_nuclear	7553	3566.74	1055456	48.44	365841	34.66	53	7564	11	0
Control_12	cellpose_cyto	327158740	17.3067	177294163	9.37886	54.1921	41392	0.541921		4h_r2_s2	mesmer_nuclear	10901	2808.51	2131735	53.03	578044	27.12	418	10909	8	0
Control_12	cellpose_custom	327158740	17.3067	289845313	15.3328	88.5947	67790	0.885947		control_r2_s1	mesmer_nuclear	10123	3103.13	4657591	136.25	1379216	29.61	30	10134	11	0
Control_13	mesmer_nuclear	320015608	16.9288	69855755	3.69537	21.8289	55754	0.218289		2d_r1_s1	mesmer_nuclear	9527	3287.95	940758	46.62	444116	47.21	30	9539	12	0
Control_13	mesmer_wholecell	320015608	16.9288	162203606	8.58057	50.6862	66120	0.506862		control_r1_s1	mesmer_nuclear	10597	3152.32	5557917	151.38	1604179	28.86	143	10613	16	0
Control_13	cellpose_cyto	320015608	16.9288	108873369	5.7594	34.0213	27230	0.340213		4d_r2_s1	mesmer_nuclear	13543	2940.62	1231209	43.98	595582	48.37	0	13561	18	0
Control_13	cellpose_custom	320015608	16.9288	282220519	14.9295	88.1896	66815	0.881896		4d_r1_s1	mesmer_nuclear	14198	3178.69	4988023	129.57	1839649	36.88	155	14209	11	0
Control_14	mesmer_nuclear	405283516	21.4395	69935785	3.6996	17.256	63233	0.17256		4d_r2_s1	mesmer_wholecell	16650	4910.9	1231209	61.82	1029222	83.59	0	16659	9	0
Control_14	mesmer_wholecell	405283516	21.4395	197153429	10.4294	48.6458	78190	0.486458		2d_r2_s1	mesmer_wholecell	12341	6604.99	1055456	58.59	722999	68.5	53	12348	7	0
Control_14	cellpose_cyto	405283516	21.4395	220126079	11.6447	54.3141	49816	0.543141		4h_r1_s1	mesmer_wholecell	16814	6511.16	3036550	129.93	2184726	71.95	553	16821	7	0
Control_14	cellpose_custom	405283516	21.4395	366597657	19.393	90.4546	79510	0.904546		control_r2_s1	mesmer_wholecell	12715	6297.98	4657591	242.62	3084896	66.23	30	12718	3	0
4h_96	mesmer_nuclear	237621411	12.5702	48812737	2.58219	20.5422	41449	0.205422		4d_r1_s1	mesmer_wholecell	17775	5353.23	4988023	195.48	3474584	69.66	155	17786	11	0
4h_96	mesmer_wholecell	237621411	12.5702	97540883	5.15991	41.0489	47667	0.410489		4h_r2_s2	mesmer_wholecell	15538	7334.13	2131735	102.95	1599650	75.04	418	15540	2	0
4h_96	cellpose_cyto	237621411	12.5702	83879509	4.43723	35.2996	22736	0.352996		2d_r1_s1	mesmer_wholecell	13627	6091.65	940758	57.02	777065	82.6	30	13630	3	0
4h_96	cellpose_custom	237621411	12.5702	206576198	10.9279	86.935	52832	0.86935		control_r1_s1	mesmer_wholecell	12575	6242.97	5557917	270.7	3404017	61.25	143	12582	7	0
4h_97	mesmer_nuclear	321343257	16.9991	52582336	2.78161	16.3633	52266	0.163633		2d_r2_s1	cellpose_cyto	3836	3971.69	1055456	59.18	227021	21.51	53	4424	588	0
4h_97	mesmer_wholecell	321343257	16.9991	115006065	6.08382	35.7892	61088	0.357892		control_r1_s1	cellpose_cyto	6827	2929.84	5557917	137.17	936488	16.85	143	7446	619	0
4h_97	cellpose_cyto	321343257	16.9991	92486626	4.89254	28.7813	29170	0.287813		4h_r1_s1	cellpose_cyto	7997	3585.86	3036550	96.28	769979	25.36	553	8997	1000	0
4h_97	cellpose_custom	321343257	16.9991	284339587	15.0416	88.4847	67926	0.884847		4h_r2_s2	cellpose_cyto	4813	6455.05	2131735	115.55	556132	26.09	418	6468	1655	0
24h_83	mesmer_nuclear	264125939	13.9723	53739216	2.8428	20.3461	46415	0.203461		4d_r1_s1	cellpose_cyto	7447	3038.16	4988023	120.62	898272	18.01	155	7858	411	0
24h_83	mesmer_wholecell	264125939	13.9723	120045824	6.35042	45.4502	54754	0.454502		control_r2_s1	cellpose_cyto	6908	3767.89	4657591	148.41	1025195	22.01	30	8049	1141	0
24h_83	cellpose_cyto	264125939	13.9723	89368195	4.72758	33.8354	22777	0.338354		2d_r1_s1	cellpose_cyto	4803	3319.7	940758	59.98	288061	30.62	30	5197	394	0
24h_83	cellpose_custom	264125939	13.9723	231341758	12.238	87.5877	58429	0.875877		4d_r2_s1	cellpose_cyto	5505	2708.29	1231209	39.4	216899	17.62	0	5832	327	0
24h_86	mesmer_nuclear	336270684	17.7887	68396299	3.61816	20.3397	57343	0.203397		4d_r2_s1	cellpose_custom	13444	7684.31	1231209	74.86	1006361	81.74	0	47589	34145	0
24h_86	mesmer_wholecell	336270684	17.7887	146842820	7.76799	43.668	66390	0.43668		control_r2_s1	cellpose_custom	10811	10326.4	4657591	378.52	4092216	87.86	30	27728	16917	0
24h_86	cellpose_cyto	336270684	17.7887	124952108	6.60997	37.1582	32537	0.371582		control_r1_s1	cellpose_custom	11037	10465.5	5557917	427.07	4713613	84.81	143	40185	29148	0
24h_86	cellpose_custom	336270684	17.7887	294070552	15.5563	87.4505	67068	0.874505		4d_r1_s1	cellpose_custom	14837	7592.68	4988023	273.64	4059978	81.39	155	40741	25904	0
48h_76	mesmer_nuclear	187143747	9.8999	38580627	2.04092	20.6155	34051	0.206155		4h_r1_s1	cellpose_custom	15413	8811.61	3036550	170.95	2634913	86.77	553	33392	17979	0
48h_76	mesmer_wholecell	187143747	9.8999	73218534	3.87326	39.1242	38209	0.391242		4h_r2_s2	cellpose_custom	14163	10102.5	2131735	133.45	1890070	88.66	418	47028	32865	0
48h_76	cellpose_cyto	187143747	9.8999	70597470	3.73461	37.7237	20587	0.377237		2d_r1_s1	cellpose_custom	13062	8204.8	940758	61	796732	84.69	30	36829	23767	0
48h_76	cellpose_custom	187143747	9.8999	163828994	8.66655	87.5418	40934	0.875418		2d_r2_s1	cellpose_custom	11401	8746.19	1055456	78.98	900398	85.31	53	30583	19182	0
48h_79	mesmer_nuclear	282543754	14.9466	55004855	2.90976	19.4677	49633	0.194677
48h_79	mesmer_wholecell	282543754	14.9466	109771239	5.8069	38.8511	56770	0.388511
48h_79	cellpose_cyto	282543754	14.9466	53486720	2.82945	18.9304	17733	0.189304
48h_79	cellpose_custom	282543754	14.9466	249225133	13.184	88.2076	69856	0.882076
				Combined information with std
				segmentation_method	mean_spot	std_spot	mean_area	std_area
				cellpose_custom	85.1538	2.62969	88.1607	1.01713
				cellpose_cyto	22.2587	4.83519	37.1396	11.2448
				mesmer_nuclear	35.8937	8.0557	19.5629	1.73393
				mesmer_wholecell	72.3525	7.75996	43.5032	5.13426
