# Supplementary material for: Spatial multiomics of acute myocardial infarction reveals immune cell infiltration through the endocardium
Source: Springer Nature journal article supplement (doi:10.1038/s44161-025-00717-y), 2025-10-03
Supplement: MOESM10 [file 44161_2025_717_MOESM10_ESM.xlsx]

## Sheet: Extended Data Figure 3B
Cell type	Timepoint	Sample ID	n_cells	percent_cells
Cardiac fibroblasts	control	sample_control_r1_s1	755	7.19664
Cardiac fibroblasts	control	sample_control_r2_s1	608	5.97015
Cardiac fibroblasts	4h	sample_4h_r1_s1	1127	11.036
Cardiac fibroblasts	4h	sample_4h_r2_s2	840	8.44815
Cardiac fibroblasts	2d	sample_2d_r1_s1	1243	22.6206
Cardiac fibroblasts	2d	sample_2d_r2_s1	681	18.4653
Cardiac fibroblasts	4d	sample_4d_r1_s1	2505	21.758
Cardiac fibroblasts	4d	sample_4d_r2_s1	2991	39.8694
Cardiomyocytes	control	sample_control_r1_s1	5990	57.0966
Cardiomyocytes	control	sample_control_r2_s1	5979	58.7097
Cardiomyocytes	4h	sample_4h_r1_s1	4463	43.7035
Cardiomyocytes	4h	sample_4h_r2_s2	4402	44.2724
Cardiomyocytes	2d	sample_2d_r1_s1	567	10.3185
Cardiomyocytes	2d	sample_2d_r2_s1	608	16.4859
Cardiomyocytes	4d	sample_4d_r1_s1	1989	17.2761
Cardiomyocytes	4d	sample_4d_r2_s1	195	2.59931
Cardiomyocytes Nppa+	control	sample_control_r1_s1	552	5.26165
Cardiomyocytes Nppa+	control	sample_control_r2_s1	544	5.34171
Cardiomyocytes Nppa+	4h	sample_4h_r1_s1	552	5.40541
Cardiomyocytes Nppa+	4h	sample_4h_r2_s2	511	5.13929
Cardiomyocytes Nppa+	2d	sample_2d_r1_s1	641	11.6652
Cardiomyocytes Nppa+	2d	sample_2d_r2_s1	798	21.6377
Cardiomyocytes Nppa+	4d	sample_4d_r1_s1	2070	17.9797
Cardiomyocytes Nppa+	4d	sample_4d_r2_s1	433	5.77179
Endocardial cells	control	sample_control_r1_s1	83	0.791154
Endocardial cells	control	sample_control_r2_s1	26	0.255302
Endocardial cells	4h	sample_4h_r1_s1	83	0.812769
Endocardial cells	4h	sample_4h_r2_s2	100	1.00573
Endocardial cells	2d	sample_2d_r1_s1	43	0.78253
Endocardial cells	2d	sample_2d_r2_s1	27	0.732104
Endocardial cells	4d	sample_4d_r1_s1	13	0.112916
Endocardial cells	4d	sample_4d_r2_s1	2	0.0266596
Endothelial cells	control	sample_control_r1_s1	2189	20.8655
Endothelial cells	control	sample_control_r2_s1	2123	20.8464
Endothelial cells	4h	sample_4h_r1_s1	2898	28.3784
Endothelial cells	4h	sample_4h_r2_s2	3042	30.5944
Endothelial cells	2d	sample_2d_r1_s1	979	17.8162
Endothelial cells	2d	sample_2d_r2_s1	640	17.3536
Endothelial cells	4d	sample_4d_r1_s1	1656	14.3837
Endothelial cells	4d	sample_4d_r2_s1	1193	15.9024
Lymphoid cells	control	sample_control_r1_s1	9	0.0857878
Lymphoid cells	control	sample_control_r2_s1	8	0.0785546
Lymphoid cells	4h	sample_4h_r1_s1	49	0.479828
Lymphoid cells	4h	sample_4h_r2_s2	70	0.704013
Lymphoid cells	2d	sample_2d_r1_s1	60	1.0919
Lymphoid cells	2d	sample_2d_r2_s1	42	1.13883
Lymphoid cells	4d	sample_4d_r1_s1	80	0.694867
Lymphoid cells	4d	sample_4d_r2_s1	66	0.879765
Myeloid cells	control	sample_control_r1_s1	416	3.9653
Myeloid cells	control	sample_control_r2_s1	436	4.28123
Myeloid cells	4h	sample_4h_r1_s1	490	4.79828
Myeloid cells	4h	sample_4h_r2_s2	449	4.51574
Myeloid cells	2d	sample_2d_r1_s1	1752	31.8835
Myeloid cells	2d	sample_2d_r2_s1	734	19.9024
Myeloid cells	4d	sample_4d_r1_s1	2617	22.7308
Myeloid cells	4d	sample_4d_r2_s1	2473	32.9645
Pericytes	control	sample_control_r1_s1	318	3.03117
Pericytes	control	sample_control_r2_s1	298	2.92616
Pericytes	4h	sample_4h_r1_s1	389	3.80924
Pericytes	4h	sample_4h_r2_s2	295	2.96691
Pericytes	2d	sample_2d_r1_s1	122	2.2202
Pericytes	2d	sample_2d_r2_s1	86	2.33189
Pericytes	4d	sample_4d_r1_s1	251	2.18014
Pericytes	4d	sample_4d_r2_s1	45	0.59984
Smooth muscle cells	control	sample_control_r1_s1	179	1.70622
Smooth muscle cells	control	sample_control_r2_s1	162	1.59073
Smooth muscle cells	4h	sample_4h_r1_s1	161	1.57658
Smooth muscle cells	4h	sample_4h_r2_s2	234	2.35341
Smooth muscle cells	2d	sample_2d_r1_s1	88	1.60146
Smooth muscle cells	2d	sample_2d_r2_s1	72	1.95228
Smooth muscle cells	4d	sample_4d_r1_s1	332	2.8837
Smooth muscle cells	4d	sample_4d_r2_s1	104	1.3863
