# Supplementary material for: Spatial multiomics of acute myocardial infarction reveals immune cell infiltration through the endocardium
Source: Springer Nature journal article supplement (doi:10.1038/s44161-025-00717-y), 2025-10-03
Supplement: MOESM11 [file 44161_2025_717_MOESM11_ESM.xlsx]

## Sheet: Extended Data Figure 4B
Pixel cluster	ANKRD1	aSMA	CCR2	CD31	CD45	CD68	MPO	PDGFRa	TNNT2	TREM2
Ankrd1+ pixels	2.43279	-0.344202	-0.29717	0.047112	-0.470771	-0.509204	-0.284204	-0.594602	0.121451	-0.451161
Mpo+ pixels	-0.142819	-0.376293	-0.300421	-0.728685	0.00058131	-0.306076	2.58642	-0.482671	-0.66934	-0.354549
aSMA+ pixels	-0.825907	2.66559	-0.569233	0.877362	-0.535976	-0.513967	-0.52044	-0.160223	-0.338004	-0.520628
Pdgfra+ pixels	-0.302507	-0.288783	-0.540058	-0.352112	-0.542249	-0.446686	-0.43779	2.56159	0.256089	-0.457069
Cd45+ pixels	-0.109162	-0.294034	0.170916	-0.0634539	2.55725	-0.0882201	0.166932	-0.14274	-0.416909	-0.188549
Ccr2+ pixels	-0.628682	-0.363199	2.58433	-0.717965	0.202187	0.351732	-0.044946	0.18248	-0.887175	0.497451
Trem2+ Cd68+ pixels	-0.32368	-0.33837	-0.0536287	-0.66667	-0.115946	2.5518	-0.371885	-0.146987	-0.708357	2.52171
Cd31+ pixels	-0.670737	-0.332044	-0.489264	2.27225	-0.590015	-0.520711	-0.531637	-0.536167	0.224761	-0.508418
Tnnt2+ pixels	0.570707	-0.328669	-0.505473	-0.667833	-0.505063	-0.518668	-0.562445	-0.680677	2.41748	-0.538783

## Sheet: Extended Data Figure 4C
Sample ID	Timepoint	Pixel_cluster	n_pixel	Percent
12	Control	Ankrd1+	14010045	0.0440403
12	Control	Ccr2+	43787	0.000137644
12	Control	Cd31+	45314489	0.142445
12	Control	Cd45+	42051	0.000132186
12	Control	Mpo+	3292329	0.0103494
12	Control	Pdgfra+	6304038	0.0198166
12	Control	Tnnt2+	248074029	0.779816
12	Control	Trem2+ Cd68+	143072	0.000449744
12	Control	aSMA+	894928	0.00281319
13	Control	Ankrd1+	1963513	0.00615865
13	Control	Ccr2+	166541	0.000522363
13	Control	Cd31+	60520786	0.189826
13	Control	Cd45+	136902	0.000429399
13	Control	Mpo+	208576	0.000654208
13	Control	Pdgfra+	19349519	0.0606906
13	Control	Tnnt2+	233260711	0.731633
13	Control	Trem2+ Cd68+	660889	0.00207291
13	Control	aSMA+	2554671	0.00801284
14	Control	Ankrd1+	740913	0.0018441
14	Control	Ccr2+	39481	9.82663e-05
14	Control	Cd31+	25050859	0.0623504
14	Control	Cd45+	33064	8.22947e-05
14	Control	Mpo+	46116	0.00011478
14	Control	Pdgfra+	6890783	0.0171508
14	Control	Tnnt2+	365014982	0.908504
14	Control	Trem2+ Cd68+	569828	0.00141827
14	Control	aSMA+	3389637	0.00843664
76	48h	Ankrd1+	31648381	0.0891672
76	48h	Ccr2+	8160515	0.0229917
76	48h	Cd31+	40355734	0.1137
76	48h	Cd45+	1344075	0.00378684
76	48h	Mpo+	6798771	0.0191551
76	48h	Pdgfra+	17852017	0.0502969
76	48h	Tnnt2+	238772049	0.672725
76	48h	Trem2+ Cd68+	7377398	0.0207853
76	48h	aSMA+	2623931	0.00739275
79	48h	Ankrd1+	36198008	0.131755
79	48h	Ccr2+	7985805	0.029067
79	48h	Cd31+	49079659	0.178642
79	48h	Cd45+	1605280	0.00584295
79	48h	Mpo+	4412068	0.0160592
79	48h	Pdgfra+	25996808	0.094624
79	48h	Tnnt2+	140729198	0.51223
79	48h	Trem2+ Cd68+	6606929	0.0240481
79	48h	aSMA+	2124309	0.00773212
83	24h	Ankrd1+	62132454	0.240522
83	24h	Ccr2+	5030676	0.0194744
83	24h	Cd31+	24401561	0.0944615
83	24h	Cd45+	546792	0.0021167
83	24h	Mpo+	8407580	0.0325468
83	24h	Pdgfra+	11168814	0.0432359
83	24h	Tnnt2+	143303427	0.554745
83	24h	Trem2+ Cd68+	861148	0.00333361
83	24h	aSMA+	2470437	0.00956337
86	24h	Ankrd1+	48620752	0.144761
86	24h	Ccr2+	1994279	0.00593765
86	24h	Cd31+	29584431	0.0880829
86	24h	Cd45+	227531	0.000677437
86	24h	Mpo+	7572886	0.0225471
86	24h	Pdgfra+	9122876	0.0271619
86	24h	Tnnt2+	236006732	0.702672
86	24h	Trem2+ Cd68+	527504	0.00157056
86	24h	aSMA+	2213219	0.00658951
96	4h	Ankrd1+	51953055	0.220666
96	4h	Ccr2+	188540	0.000800807
96	4h	Cd31+	17278365	0.0733883
96	4h	Cd45+	372910	0.0015839
96	4h	Mpo+	3648429	0.0154964
96	4h	Pdgfra+	5392737	0.0229052
96	4h	Tnnt2+	154642455	0.65683
96	4h	Trem2+ Cd68+	317171	0.00134716
96	4h	aSMA+	1643922	0.00698241
97	4h	Ankrd1+	31942825	0.100263
97	4h	Ccr2+	389729	0.00122329
97	4h	Cd31+	29180856	0.0915934
97	4h	Cd45+	272578	0.000855573
97	4h	Mpo+	4694561	0.0147354
97	4h	Pdgfra+	8437566	0.026484
97	4h	Tnnt2+	240777900	0.755758
97	4h	Trem2+ Cd68+	453162	0.00142239
97	4h	aSMA+	2441980	0.00766493
