# Supplementary material for: Spatial multiomics of acute myocardial infarction reveals immune cell infiltration through the endocardium
Source: Springer Nature journal article supplement (doi:10.1038/s44161-025-00717-y), 2025-10-03
Supplement: MOESM12 [file 44161_2025_717_MOESM12_ESM.xlsx]

## Sheet: Extended Data Figure 5B+C
Absolute cell count per region
Endocardial IZ					Infarct core					Epicardial IZ					Border zone
pre	4h	1d	2d		pre	4h	1d	2d		pre	4h	1d	2d		pre	4h	1d	2d
1	8	381	370		8	7	130	454		1	2	9	384		1	44	292	1014
7	33	421	205		15	29	134	731		0	0	24	406		47	41	309	608
0	32	456	279		39	58	133	489		1	22	34	233		43	55	473	399
Relative cell count in cells / mm^2
Endocardial IZ					Infarct core					Epicardial IZ					Border zone
pre	4h	1d	2d		pre	4h	1d	2d		pre	4h	1d	2d		pre	4h	1d	2d
3.12309	43.5002	1000.45	959.673		6.01554	4.77582	81.6702	159.736		7.31544	7.61854	33.9828	775.166		1.1569	26.9	130.472	573.616
49.4017	97.6697	1406.18	643.527		12.5366	9.45368	82.3432	295.264		0	0	104.305	763.849		19.0592	27.8935	195.206	434.146
0	109.424	1412.51	848.699		19.549	18.1701	68.9081	144.329		6.07933	51.5048	111.249	541.262		22.1736	22.9967	195.913	308.032
