# Supplementary material for: Spatial multiomics of acute myocardial infarction reveals immune cell infiltration through the endocardium
Source: Springer Nature journal article supplement (doi:10.1038/s44161-025-00717-y), 2025-10-03
Supplement: MOESM13 [file 44161_2025_717_MOESM13_ESM.xlsx]

## Sheet: Extended Data Figure 6B
FOV	timepoint	lumen_bin	mono_per_mm2	endothelial_per_mm2
24h_83	24h	1	1817.36	70.2845
24h_83	24h	2	1156	511.788
24h_83	24h	3	774.317	689.511
24h_83	24h	4	599.87	654.404
24h_86	24h	1	667.58	54.373
24h_86	24h	2	428.07	258.626
24h_86	24h	3	361.669	265.224
24h_86	24h	4	269.096	296.933
48h_76	48h	1	560.086	185.771
48h_76	48h	2	380.568	663.11
48h_76	48h	3	532.098	880.713
48h_76	48h	4	669.788	777.716
48h_79	48h	1	468.237	178.376
48h_79	48h	2	509.573	817.386
48h_79	48h	3	529.332	1010.54
48h_79	48h	4	551.509	1130.32
4h_96	4h	1	306.033	83.0661
4h_96	4h	2	31.9962	553.077
4h_96	4h	3	18.7975	643.814
4h_96	4h	4	19.5584	601.419
4h_97	4h	1	208.135	79.2894
4h_97	4h	2	70.1227	390.684
4h_97	4h	3	39.9809	569.728
4h_97	4h	4	60.4295	599.26
Control_12	Control	1	0	281.944
Control_12	Control	2	4.77751	630.631
Control_12	Control	3	9.53412	824.701
Control_12	Control	4	0	763.938
Control_13	Control	1	4.60413	570.912
Control_13	Control	2	0	1126.48
Control_13	Control	3	18.7688	1154.28
Control_13	Control	4	9.68604	1351.2
Control_14	Control	1	8.12374	93.423
Control_14	Control	2	3.72067	126.503
Control_14	Control	3	3.67505	102.902
Control_14	Control	4	0	220.9
