# Supplementary material for: Spatial multiomics of acute myocardial infarction reveals immune cell infiltration through the endocardium
Source: Springer Nature journal article supplement (doi:10.1038/s44161-025-00717-y), 2025-10-03
Supplement: MOESM14 [file 44161_2025_717_MOESM14_ESM.xlsx]

## Sheet: Extended Data Figure 7A+B
male	endocardium healthy	endocardium remote	endocardium infarct	endothel core	endothel epicardial layer
mouse_1	309.936	475.538	1147	457.838	219.693
mouse_2	287.374	446.645	1056.32	162.511	155.21
mouse_3	290.537	309.145	823	263.96	148.312
female	endocardium healthy	endocardium remote	endocardium infarct	endothel core	endothel epicardial layer
mouse_1	313.363	437.51	952.559	415.429	407.32
mouse_2	323.692	565.987	1550.12	481.653	459.854
mouse_3	312.292	583.519	1195.58	341.34	443.064

## Sheet: Extended Data Figure 7D+E
MFI vWF	control	IR remote	IR IZ
	482.034	538.318	800.644
	529.652	575.155	775.599
	482.244	275.621	663.442
		400.197	669.844
CCR2+ cells / mm^2	control	IR remote	IR IZ
	52.5273	49.0689	5295.66
	422.375	149.929	2263.31
	382.624	46.8636	2266.27
		40.0758	3229.86
